# Supplementary material for: Centrifuge: rapid and sensitive classification of metagenomic sequences
Source: Genome Res. 2016 Dec;26(12):1721–9. doi: 10.1101/gr.210641.116 (PMC5131823; doi:10.1101/gr.210641.116)
Supplement: Supplemental Material [file supp_gr.210641.116_Supplemental_Table_S2.xlsx]

## Sheet: centrifuge
						Correct: assignment is unique and correct
						Multi+Correct: assignment is not unique and one the assignments is correct
						Incorrect: assignment is unique and incorrect
						Multi+incorrect: assignment is not unique and all of the assignments are incorrect
Sequence Id	Taxonomy Id	Scientific Name	Genome Size	# of reads from 10M	# of reads from 10K	Genus_Correct	Genus_Multi+Correct	Genus_Incorrect	Genus_Multi+Incorrect	Species_Correct	Species_Multi+Correct	Species_Incorrect	Species_Multi+Incorrect	Chosen	Genus_Correct	Genus_Multi+Correct	Genus_Wrong	Genus_Multi+Wrong
NZ_CP009261.1	672	Vibrio vulnificus	5127345	3296	2	1	0	0	0	1	0	0	0	1	1	0	0	0
NC_017253.1	713601	Buchnera aphidicola str. JF99 (Acyrthosiphon pisum)	641716	404	2	1	0	0	0	1	0	0	0	1	1	0	0	0
NZ_CP008984.1	272556	Aggregatibacter actinomycetemcomitans HK1651	2105380	1274	0	0	0	0	0	0	0	0	0	0	0	0	0	0
NZ_CP006823.1	1382923	Helicobacter pylori oki154	1599700	1012	1	1	0	0	0	1	0	0	0	0	1	0	0	0
NZ_LN907858.1	76936	Helicobacter typhlonius	1920832	1203	4	4	0	0	0	3	1	0	0	1	4	0	0	0
NC_018101.1	996634	Corynebacterium ulcerans 0102	2579188	1629	2	2	0	0	0	2	0	0	0	0	0	0	0	0
NC_017262.1	555217	Zymomonas mobilis subsp. mobilis ATCC 10988	2143461	1355	1	1	0	0	0	1	0	0	0	1	1	0	0	0
NZ_CP010276.1	96345	Flavobacterium psychrophilum	2850626	1802	0	0	0	0	0	0	0	0	0	0	0	0	0	0
NZ_CP009408.1	319705	Mycobacterium abscessus subsp. bolletii	5064190	3210	1	1	0	0	0	1	0	0	0	1	1	0	0	0
NZ_CP007566.1	1418110	Aeromonas hydrophila AL09-71	5023861	3240	0	0	0	0	0	0	0	0	0	0	0	0	0	0
NZ_CP007793.1	192	Azospirillum brasilense	7391279	4635	2	2	0	0	0	2	0	0	0	1	2	0	0	0
NC_004631.1	209261	Salmonella enterica subsp. enterica serovar Typhi str. Ty2	4791961	3091	1	1	0	0	0	1	0	0	0	0	1	0	0	0
NC_014501.1	497965	Cyanothece sp. PCC 7822	7841948	4979	1	1	0	0	0	1	0	0	0	1	1	0	0	0
NZ_CP007505.1	1003191	Salmonella enterica subsp. enterica serovar Tennessee str. TXSC_TXSC08-19	4864410	3245	0	0	0	0	0	0	0	0	0	1	0	0	0	0
NZ_CP011004.1	1639	Listeria monocytogenes	2911639	1912	5	5	0	0	0	5	0	0	0	1	5	0	0	0
NZ_HF572917.1	562	Escherichia coli	5443340	3383	5	2	3	0	0	2	3	0	0	1	2	2	1	0
NC_017027.1	1132496	Pasteurella multocida subsp. multocida str. HN06	2407578	1563	0	0	0	0	0	0	0	0	0	1	0	0	0	0
NZ_CP009847.1	670	Vibrio parahaemolyticus	5171661	3214	4	4	0	0	0	3	1	0	0	1	4	0	0	0
NC_016516.1	1114966	Propionibacterium acnes TypeIA2 P.acn33	2489623	1579	2	2	0	0	0	1	0	1	0	0	2	0	0	0
NC_014925.1	937773	Staphylococcus pseudintermedius HKU10-03	2617381	1631	2	2	0	0	0	2	0	0	0	1	2	0	0	0
NC_014318.1	749927	Amycolatopsis mediterranei U32	10236715	6655	3	3	0	0	0	3	0	0	0	0	0	0	0	0
NZ_CP007806.1	1042163	Brevibacillus laterosporus LMG 15441	5153859	3387	4	4	0	0	0	4	0	0	0	1	4	0	0	0
NZ_LN774769.1	297352	Lactococcus piscium MKFS47	2503066	1546	2	2	0	0	0	2	0	0	0	0	0	0	0	0
NZ_CP012370.1	1525	Moorella thermoacetica	2623349	1698	1	1	0	0	0	1	0	0	0	1	1	0	0	0
NC_022529.1	1347340	Campylobacter jejuni 4031	1669329	1073	0	0	0	0	0	0	0	0	0	1	0	0	0	0
NC_022196.1	469604	Fusobacterium nucleatum subsp. vincentii 3_1_36A2	2268272	1507	0	0	0	0	0	0	0	0	0	1	0	0	0	0
NC_018527.1	1229785	Burkholderia pseudomallei BPC006	7155061	4684	2	2	0	0	0	0	2	0	0	1	2	0	0	0
NC_017214.1	552531	Bifidobacterium animalis subsp. lactis BB-12	1942198	1274	1	1	0	0	0	1	0	0	0	0	1	0	0	0
NC_014494.1	574093	Streptococcus pneumoniae AP200	2130580	1369	3	3	0	0	0	3	0	0	0	0	3	0	0	0
NC_017904.1	1168287	Mycobacterium sp. MOTT36Y	5613626	3605	3	2	0	1	0	0	2	1	0	0	1	0	1	0
NZ_CP011572.1	550	Enterobacter cloacae	5006987	3096	2	2	0	0	0	2	0	0	0	0	1	0	1	0
NZ_CP009298.1	360118	Burkholderia pseudomallei 406e	7271506	4787	5	4	0	0	0	3	1	0	0	1	4	0	0	0
NC_018937.1	1234365	Helicobacter pylori Rif1	1667883	1097	2	2	0	0	0	2	0	0	0	1	2	0	0	0
NC_017251.1	204722	Brucella suis 1330	3315163	2077	1	1	0	0	0	0	0	0	0	0	1	0	0	0
NC_012440.1	123214	Persephonella marina EX-H1	1983966	1280	1	1	0	0	0	1	0	0	0	1	1	0	0	0
NC_010943.1	522373	Stenotrophomonas maltophilia K279a	4851126	3054	4	3	0	1	0	3	0	1	0	1	4	0	0	0
NZ_CP006758.1	1345705	Yersinia pestis 1522	4738644	3091	4	4	0	0	0	0	4	0	0	0	4	0	0	0
NZ_CP011246.1	358	Agrobacterium tumefaciens	5668655	3645	6	6	0	0	0	5	1	0	0	1	6	0	0	0
NZ_CP010409.1	56458	Xanthomonas sacchari	5006106	3095	4	4	0	0	0	4	0	0	0	0	0	0	1	0
NZ_CP006711.1	1385938	Bifidobacterium breve 12L	2244624	1458	2	2	0	0	0	1	1	0	0	0	2	0	0	0
NC_021878.1	1036172	Arcobacter butzleri 7h1h	2253233	1480	3	3	0	0	0	3	0	0	0	1	3	0	0	0
NC_003062.2	176299	Agrobacterium fabrum str. C58	5674258	3670	8	8	0	0	0	7	1	0	0	1	8	0	0	0
NZ_CP009503.1	1434103	Methanosarcina sp. WWM596	4137337	2676	3	2	0	0	0	0	2	0	0	0	1	0	0	0
NC_010280.2	471473	Chlamydia trachomatis L2b/UCH-1/proctitis	1038863	672	1	1	0	0	0	1	0	0	0	0	1	0	0	0
NC_015930.1	420889	Lactococcus garvieae ATCC 49156	1950135	1238	0	0	0	0	0	0	0	0	0	0	0	0	0	0
NC_007333.1	269800	Thermobifida fusca YX	3642249	2245	2	2	0	0	0	2	0	0	0	1	2	0	0	0
NC_004070.1	198466	Streptococcus pyogenes MGAS315	1900521	1237	2	2	0	0	0	1	1	0	0	0	2	0	0	0
NZ_CP009428.1	189426	Paenibacillus odorifer	6812473	4185	3	3	0	0	0	3	0	0	0	0	1	0	0	0
NZ_CP012559.1	1074467	Lactobacillus heilongjiangensis	2790548	1697	1	1	0	0	0	1	0	0	0	0	0	0	0	0
NC_017617.1	423211	Streptococcus suis GZ1	2038034	1295	0	0	0	0	0	0	0	0	0	0	0	0	0	0
NZ_CP010907.1	1235990	Candidatus Pantoea carbekii	1196948	799	1	1	0	0	0	1	0	0	0	1	1	0	0	0
NC_017525.1	1081094	Legionella pneumophila subsp. pneumophila str. Hextuple_2q	2682626	1712	3	3	0	0	0	3	0	0	0	1	3	0	0	0
NZ_CP007584.1	1454585	Salmonella enterica subsp. enterica serovar Anatum str. USDA-ARS-USMARC-1735	4844415	3151	2	2	0	0	0	2	0	0	0	0	2	0	0	0
NC_012673.1	360911	Exiguobacterium sp. AT1b	2999895	1905	2	2	0	0	0	2	0	0	0	1	2	0	0	0
NC_013441.1	526226	Gordonia bronchialis DSM 43247	5290012	3415	4	4	0	0	0	4	0	0	0	1	4	0	0	0
NC_021351.1	1232381	Corynebacterium glutamicum SCgG1	3350620	2199	2	2	0	0	0	1	1	0	0	0	2	0	0	0
NZ_AP014565.1	996633	Salmonella enterica subsp. enterica serovar Typhimurium str. L-3553	5184452	3379	4	4	0	0	0	3	1	0	0	0	4	0	0	0
NC_009436.1	399742	Enterobacter sp. 638	4676461	3017	2	2	0	0	0	2	0	0	0	0	0	0	0	0
NZ_AP014683.1	1469502	Burkholderiales bacterium GJ-E10	3276549	0	0	0	0	0	0	0	0	0	0	0	0	0	0	0
NC_008531.1	203120	Leuconostoc mesenteroides subsp. mesenteroides ATCC 8293	2075763	1278	1	1	0	0	0	1	0	0	0	1	1	0	0	0
NC_011852.1	557723	Haemophilus parasuis SH0165	2269156	1414	1	1	0	0	0	1	0	0	0	0	0	0	0	0
NC_002505.1	243277	Vibrio cholerae O1 biovar El Tor str. N16961	4033464	2629	4	4	0	0	0	4	0	0	0	0	4	0	0	0
NZ_CP009751.1	743277	Bordetella pertussis B1917	4102186	2621	0	0	0	0	0	0	0	0	0	1	0	0	0	0
NC_004061.1	198804	Buchnera aphidicola str. Sg (Schizaphis graminum)	641454	411	0	0	0	0	0	0	0	0	0	0	0	0	0	0
NC_010117.1	360115	Coxiella burnetii RSA 331	2053744	1337	3	3	0	0	0	3	0	0	0	1	3	0	0	0
NC_017954.1	1184251	Thermogladius cellulolyticus 1633	1356318	855	0	0	0	0	0	0	0	0	0	1	0	0	0	0
NC_015945.1	886377	Muricauda ruestringensis DSM 13258	3842422	2497	3	3	0	0	0	3	0	0	0	1	3	0	0	0
NC_011831.1	326427	Chloroflexus aggregans DSM 9485	4684931	3036	5	4	0	0	0	4	0	0	0	1	5	0	0	0
NZ_CP008711.1	13373	Burkholderia mallei	5647769	3644	3	3	0	0	0	0	2	0	1	0	3	0	0	0
NC_002607.1	64091	Halobacterium sp. NRC-1	2571010	1675	1	1	0	0	0	1	0	0	0	1	1	0	0	0
NC_014006.1	452662	Sphingobium japonicum UT26S	4424862	2818	4	4	0	0	0	3	1	0	0	1	4	0	0	0
NC_018013.1	746697	Aequorivita sublithincola DSM 14238	3520671	2288	4	4	0	0	0	4	0	0	0	1	4	0	0	0
NZ_CP011295.1	1833	Rhodococcus erythropolis	6865205	4436	3	2	0	0	0	2	0	0	0	0	2	0	0	0
NC_015663.1	1028307	Enterobacter aerogenes KCTC 2190	5280350	3433	1	1	0	0	0	1	0	0	0	1	1	0	0	0
NZ_CP010850.1	29461	Brucella suis	3315086	2071	0	0	0	0	0	0	0	0	0	0	0	0	0	0
NZ_CP011618.1	571	Klebsiella oxytoca	6673117	4321	4	3	0	0	0	3	0	0	0	0	0	1	0	0
NC_007297.2	293653	Streptococcus pyogenes MGAS5005	1838562	1186	0	0	0	0	0	0	0	0	0	0	0	0	0	0
NC_016811.1	933093	Legionella pneumophila subsp. pneumophila ATCC 43290	3359001	2230	2	2	0	0	0	2	0	0	0	1	2	0	0	0
NC_018491.1	1217984	Bacillus cereus FRI-35	5382319	3460	4	3	0	0	0	2	1	0	0	0	3	0	0	0
NZ_CP012372.1	543737	Francisella tularensis subsp. tularensis MA00-2987	1892645	1272	2	2	0	0	0	2	0	0	0	1	2	0	0	0
NZ_CP009524.1	1434099	Methanosarcina sp. Kolksee	4553495	2833	4	4	0	0	0	2	2	0	0	0	0	0	0	0
NC_017763.1	1074252	Staphylococcus aureus subsp. aureus HO 5096 0412	2832299	1763	3	3	0	0	0	3	0	0	0	0	3	0	0	0
NZ_CP007055.1	797299	Halostagnicola larsenii XH-48	4131176	2546	3	2	0	0	0	2	0	0	0	1	2	0	0	0
NC_016633.1	158190	Sphaerochaeta pleomorpha str. Grapes	3590853	2321	4	4	0	0	0	4	0	0	0	1	4	0	0	0
NC_013406.1	481743	Paenibacillus sp. Y412MC10	7121665	4588	1	1	0	0	0	1	0	0	0	0	0	0	0	0
NC_015311.1	767031	Prevotella denticola F0289	2937589	1819	0	0	0	0	0	0	0	0	0	1	0	0	0	0
NZ_LN794158.1	1581680	Candidatus Methylopumilus turicensis	1754988	1186	0	0	0	0	0	0	0	0	0	1	0	0	0	0
NZ_CP011956.1	129394	Xanthomonas oryzae pv. oryzicola	4790622	3124	4	3	0	0	0	3	0	0	0	0	4	0	0	0
NC_005364.2	272632	Mycoplasma mycoides subsp. mycoides SC str. PG1	1211703	804	1	1	0	0	0	1	0	0	0	0	0	0	0	0
NZ_CP009613.1	319705	Mycobacterium abscessus subsp. bolletii	5049258	3221	3	3	0	0	0	3	0	0	0	0	3	0	0	0
NZ_CP007477.1	1249654	Ehrlichia chaffeensis str. Osceola	1175197	717	1	1	0	0	0	1	0	0	0	1	1	0	0	0
NZ_CP010539.1	1213463	Mycoplasma pneumoniae 19294	817313	515	0	0	0	0	0	0	0	0	0	1	0	0	0	0
NC_017279.1	567106	Campylobacter jejuni subsp. jejuni IA3902	1672219	1048	3	3	0	0	0	2	1	0	0	0	3	0	0	0
NC_017238.1	390236	Borrelia afzelii PKo	1404288	913	3	3	0	0	0	3	0	0	0	1	3	0	0	0
NC_008596.1	246196	Mycobacterium smegmatis str. MC2 155	6988209	4496	2	2	0	0	0	2	0	0	0	1	2	0	0	0
NZ_CP009042.1	686	Vibrio cholerae O1 biovar El Tor	4091935	2650	4	4	0	0	0	4	0	0	0	0	4	0	0	0
NC_002528.1	107806	Buchnera aphidicola str. APS (Acyrthosiphon pisum)	655725	415	3	3	0	0	0	3	0	0	0	1	3	0	0	0
NC_022606.1	1266845	Carnobacterium inhibens subsp. gilichinskyi	2497115	1536	1	1	0	0	0	1	0	0	0	1	1	0	0	0
NZ_CP010890.1	1280	Staphylococcus aureus	2810810	1731	2	2	0	0	0	2	0	0	0	1	2	0	0	0
NZ_CP013334.1	1307444	Fusobacterium hwasookii ChDC F300	2527063	1603	0	0	0	0	0	0	0	0	0	1	0	0	0	0
NC_013162.1	521097	Capnocytophaga ochracea DSM 7271	2612925	1699	2	2	0	0	0	1	1	0	0	1	2	0	0	0
NC_009523.1	357808	Roseiflexus sp. RS-1	5801598	3733	7	6	0	0	0	6	0	0	0	1	6	0	0	0
NZ_CP007666.1	261591	Bacillus anthracis str. Vollum	5506189	3525	8	8	0	0	0	0	8	0	0	1	8	0	0	0
NC_009954.1	397948	Caldivirga maquilingensis IC-167	2077567	1299	1	1	0	0	0	1	0	0	0	1	1	0	0	0
NC_010742.1	430066	Brucella abortus S19	3283936	2098	3	3	0	0	0	0	0	0	1	1	3	0	0	0
NZ_CP009464.1	1392	Bacillus anthracis	5505665	3536	3	3	0	0	0	0	3	0	0	1	3	0	0	0
NC_017080.1	1142394	Phycisphaera mikurensis NBRC 102666	3884382	2470	3	3	0	0	0	3	0	0	0	1	3	0	0	0
NC_008817.1	167542	Prochlorococcus marinus str. MIT 9515	1704176	1123	3	3	0	0	0	3	0	0	0	0	2	0	0	0
NZ_CP008921.1	1214179	Streptococcus suis 6407	2292360	1460	1	1	0	0	0	1	0	0	0	1	1	0	0	0
NZ_LN868200.1	470	Acinetobacter baumannii	3819158	2446	3	3	0	0	0	3	0	0	0	0	3	0	0	0
NZ_CP007067.1	1033991	Rhizobium leguminosarum bv. trifolii CB782	6703653	4146	4	4	0	0	0	4	0	0	0	1	4	0	0	0
NZ_CP006692.1	1382510	Salmonella bongori serovar 48:z41:-- str. RKS3044	4394500	2884	1	1	0	0	0	0	1	0	0	1	1	0	0	0
NC_014625.1	880591	Ketogulonicigenium vulgare Y25	3288404	2082	3	3	0	0	0	3	0	0	0	1	3	0	0	0
NC_014125.1	423212	Legionella pneumophila 2300/99 Alcoy	3516334	2238	0	0	0	0	0	0	0	0	0	1	0	0	0	0
NC_002944.2	262316	Mycobacterium avium subsp. paratuberculosis K-10	4829781	3181	3	3	0	0	0	3	0	0	0	1	3	0	0	0
NZ_CP010954.1	484429	Sphingobium sp. YBL2	5427419	3378	5	4	0	0	0	4	0	0	0	0	0	0	0	0
NZ_CP009631.1	1449978	Burkholderia vietnamiensis LMG 10929	6930496	4470	8	8	0	0	0	2	3	2	0	1	8	0	0	0
NZ_CP011456.1	1647413	Anabaena sp. wa102	5782034	3702	6	6	0	0	0	5	1	0	0	0	4	0	0	0
NC_020945.1	1071773	Chlamydia trachomatis L2b/8200/07	1046364	682	1	1	0	0	0	1	0	0	0	1	1	0	0	0
NC_017504.1	722438	Mycoplasma pneumoniae FH	811088	513	1	1	0	0	0	1	0	0	0	0	1	0	0	0
NZ_CP009607.1	1450527	Francisella tularensis subsp. novicida D9876	1870206	1211	3	3	0	0	0	2	1	0	0	0	3	0	0	0
NC_014391.1	644283	Micromonospora aurantiaca ATCC 27029	7025559	4573	6	6	0	0	0	3	3	0	0	1	6	0	0	0
NZ_CP009704.1	632	Yersinia pestis	4709246	2945	6	5	0	0	0	2	3	0	0	0	5	0	0	0
NZ_CP007420.1	1412458	Salmonella enterica subsp. enterica serovar Enteritidis str. EC20100103	4735383	3078	5	5	0	0	0	5	0	0	0	1	5	0	0	0
NC_005043.1	182082	Chlamydophila pneumoniae TW-183	1225935	831	1	1	0	0	0	1	0	0	0	1	1	0	0	0
NC_011999.1	458233	Macrococcus caseolyticus JCSC5402	2219737	1394	1	1	0	0	0	1	0	0	0	1	1	0	0	0
NC_017094.1	1162668	Leptospirillum ferrooxidans C2-3	2559538	1626	3	3	0	0	0	3	0	0	0	1	3	0	0	0
NZ_CP009092.1	149539	Salmonella enterica subsp. enterica serovar Enteritidis	4709890	3092	5	5	0	0	0	5	0	0	0	1	5	0	0	0
NC_017045.1	693978	Riemerella anatipestifer ATCC 11845 = DSM 15868	2164087	1464	2	2	0	0	0	2	0	0	0	1	2	0	0	0
NC_021291.1	1260251	Spiribacter salinus M19-40	1739487	1141	3	3	0	0	0	3	0	0	0	1	3	0	0	0
NC_021838.1	1639	Listeria monocytogenes	3091600	1944	0	0	0	0	0	0	0	0	0	0	0	0	0	0
NC_017735.1	1163745	Helicobacter cetorum MIT 99-5656	1847790	1246	0	0	0	0	0	0	0	0	0	0	0	0	0	0
NC_000922.1	115713	Chlamydophila pneumoniae CWL029	1230230	789	1	1	0	0	0	1	0	0	0	1	1	0	0	0
NC_017621.1	1004952	Streptococcus suis D12	2183059	1410	1	1	0	0	0	1	0	0	0	0	1	0	0	0
NC_021659.1	1348660	Serratia plymuthica S13	5467306	3536	4	3	1	0	0	3	0	0	1	1	4	0	0	0
NC_002162.1	273119	Ureaplasma parvum serovar 3 str. ATCC 700970	751719	523	0	0	0	0	0	0	0	0	0	1	0	0	0	0
NC_010322.1	76869	Pseudomonas putida GB-1	6078430	3974	5	5	0	0	0	5	0	0	0	1	5	0	0	0
NC_015722.1	696127	Candidatus Midichloria mitochondrii IricVA	1183732	728	1	1	0	0	0	1	0	0	0	1	1	0	0	0
NZ_CP007633.1	126738	Thermotoga sp. RQ7	1851618	1180	1	1	0	0	0	0	1	0	0	1	1	0	0	0
NC_022905.1	1423891	Brucella ceti TE10759-12	3278034	2119	3	3	0	0	0	0	0	0	0	0	3	0	0	0
NZ_CP012148.1	1597	Lactobacillus paracasei	3076437	2001	0	0	0	0	0	0	0	0	0	1	0	0	0	0
NZ_CP004117.1	1249662	Burkholderia thailandensis E444	6651696	4235	6	6	0	0	0	4	1	0	0	1	6	0	0	0
NC_018419.1	1199245	secondary endosymbiont of Ctenarytaina eucalypti	1441139	0	0	0	0	0	0	0	0	0	0	0	0	0	0	0
NC_012560.1	322710	Azotobacter vinelandii DJ	5365318	3444	3	3	0	0	0	3	0	0	0	1	3	0	0	0
NZ_CP009706.1	1453496	Hafnia alvei FB1	4712721	2992	2	2	0	0	0	2	0	0	0	1	2	0	0	0
NC_017249.1	1037409	Bradyrhizobium japonicum USDA 6	9207384	5859	8	8	0	0	0	7	1	0	0	1	7	0	0	0
NZ_CBVU010000001.1	1407064	Erwinia amylovora LA637	3869546	2419	0	0	0	0	0	0	0	0	0	1	0	0	0	0
NC_008740.1	351348	Marinobacter hydrocarbonoclasticus VT8	4779762	2979	2	1	1	0	0	1	1	0	0	0	1	0	1	0
NZ_CP013106.1	1178482	Halomonas huangheensis	4757486	3120	6	6	0	0	0	6	0	0	0	1	6	0	0	0
NZ_CP012070.1	1658671	Arsenicicoccus sp. oral taxon 190	3525271	2301	3	3	0	0	0	3	0	0	0	1	3	0	0	0
NZ_CP008852.1	484770	Pelosinus sp. UFO1	5115410	3247	4	3	0	0	0	3	0	0	0	1	3	0	0	0
NC_008698.1	368408	Thermofilum pendens Hrk 5	1813393	1124	5	4	0	0	0	4	0	0	0	1	4	0	0	0
NC_011658.1	405534	Bacillus cereus AH187	5599857	3550	3	3	0	0	0	2	1	0	0	1	3	0	0	0
NC_017453.1	510831	Francisella tularensis subsp. tularensis NE061598	1892681	1231	3	3	0	0	0	3	0	0	0	0	3	0	0	0
NC_014207.1	666681	Methylotenera versatilis 301	3059871	1972	2	2	0	0	0	2	0	0	0	1	2	0	0	0
NC_020063.1	693444	Enterobacteriaceae bacterium strain FGI 57	4762179	0	0	0	0	0	0	0	0	0	0	0	0	0	0	0
NC_009901.1	398579	Shewanella pealeana ATCC 700345	5174581	3346	3	3	0	0	0	3	0	0	0	1	3	0	0	0
NC_014830.1	710696	Intrasporangium calvum DSM 43043	4024382	2556	1	1	0	0	0	1	0	0	0	1	1	0	0	0
NZ_CP011051.1	1423	Bacillus subtilis	4031727	2540	4	4	0	0	0	3	1	0	0	1	4	0	0	0
NC_008346.1	335541	Syntrophomonas wolfei subsp. wolfei str. Goettingen G311	2936195	1817	2	2	0	0	0	2	0	0	0	1	2	0	0	0
NC_021879.1	1184253	Anaplasma phagocytophilum str. HZ2	1477581	959	3	3	0	0	0	3	0	0	0	1	3	0	0	0
NC_010994.1	491916	Rhizobium etli CIAT 652	6448048	4103	3	3	0	0	0	3	0	0	0	0	0	0	0	0
NZ_ABIZ01000001.1	240016	Verrucomicrobium spinosum DSM 4136 = JCM 18804	8220857	5267	4	4	0	0	0	4	0	0	0	1	4	0	0	0
NC_017513.1	935599	Neisseria meningitidis G2136	2184862	1420	0	0	0	0	0	0	0	0	0	1	0	0	0	0
NZ_CP009227.1	1539298	Treponema sp. OMZ 838	2708067	1736	0	0	0	0	0	0	0	0	0	0	0	0	0	0
NC_016593.1	1111068	Geobacillus thermoleovorans CCB_US3_UF5	3596620	2270	2	1	0	0	0	0	1	0	0	0	2	0	0	0
NZ_CP007035.1	929713	Niabella soli DSM 19437	4697343	3035	3	3	0	0	0	3	0	0	0	1	3	0	0	0
NC_010655.1	349741	Akkermansia muciniphila ATCC BAA-835	2664102	1626	1	1	0	0	0	1	0	0	0	1	1	0	0	0
NC_011663.1	407976	Shewanella baltica OS223	5358884	3322	5	5	0	0	0	5	0	0	0	1	5	0	0	0
NZ_CP009104.1	562	Escherichia coli	4995948	3167	1	0	1	0	0	0	1	0	0	1	0	1	0	0
NC_022442.1	1201010	Staphylococcus aureus subsp. aureus SA957	2789538	1755	1	1	0	0	0	1	0	0	0	1	1	0	0	0
NC_009455.1	216389	Dehalococcoides mccartyi BAV1	1341892	873	0	0	0	0	0	0	0	0	0	1	0	0	0	0
NC_020125.1	1271752	Riemerella anatipestifer RA-CH-2	2166321	1398	0	0	0	0	0	0	0	0	0	1	0	0	0	0
NC_018018.1	880071	Flexibacter litoralis DSM 6794	4919337	3178	1	1	0	0	0	1	0	0	0	1	1	0	0	0
NC_010287.1	471472	Chlamydia trachomatis 434/Bu	1038842	710	0	0	0	0	0	0	0	0	0	1	0	0	0	0
NC_017048.1	1105098	Rickettsia prowazekii str. GvV257	1111969	686	1	1	0	0	0	1	0	0	0	0	0	0	0	0
NZ_CP008905.1	1333849	Enterobacter cloacae ECR091	4959888	3171	2	2	0	0	0	2	0	0	0	1	2	0	0	0
NZ_CP007051.1	694431	Desulfurella acetivorans A63	1819992	1141	0	0	0	0	0	0	0	0	0	1	0	0	0	0
NC_018528.1	880633	Lactobacillus helveticus R0052	2129206	1390	0	0	0	0	0	0	0	0	0	0	0	0	0	0
NC_010717.2	360094	Xanthomonas oryzae pv. oryzae PXO99A	5238555	3336	5	5	0	0	0	5	0	0	0	1	5	0	0	0
NC_015259.1	991905	Polymorphum gilvum SL003B-26A1	4718963	3030	0	0	0	0	0	0	0	0	0	1	0	0	0	0
NC_008571.1	411154	Gramella forsetii KT0803	3798465	2486	2	2	0	0	0	2	0	0	0	1	2	0	0	0
NC_020300.1	1094489	Bartonella australis Aust/NH1	1596490	1019	0	0	0	0	0	0	0	0	0	1	0	0	0	0
NC_007705.1	342109	Xanthomonas oryzae pv. oryzae MAFF 311018	4940217	3094	8	8	0	0	0	8	0	0	0	0	8	0	0	0
NC_015684.1	504832	Oligotropha carboxidovorans OM5	3896074	2460	0	0	0	0	0	0	0	0	0	1	0	0	0	0
NZ_CP010433.1	28025	Bifidobacterium animalis	1958651	1247	3	3	0	0	0	3	0	0	0	0	3	0	0	0
NZ_CP008704.1	13373	Burkholderia mallei	5625292	3576	5	4	0	0	0	0	2	1	1	0	5	0	0	0
NC_017911.1	1037911	Pseudomonas fluorescens A506	6019547	3721	7	7	0	0	0	7	0	0	0	1	7	0	0	0
NC_012704.1	645127	Corynebacterium kroppenstedtii DSM 44385	2446804	1638	1	1	0	0	0	1	0	0	0	1	1	0	0	0
NZ_CP006911.1	1125411	Candidatus Thioglobus singularis PS1	1714148	1085	3	3	0	0	0	3	0	0	0	1	3	0	0	0
NC_018011.1	679935	Alistipes finegoldii DSM 17242	3734239	2405	2	1	0	0	0	1	0	0	0	1	1	0	0	0
NC_009663.1	387093	Sulfurovum sp. NBC37-1	2562277	1674	2	2	0	0	0	2	0	0	0	1	2	0	0	0
NC_017308.1	1087454	Corynebacterium pseudotuberculosis 1/06-A	2279118	1438	2	2	0	0	0	2	0	0	0	0	2	0	0	0
NZ_CP007495.1	1172205	Bordetella holmesii 44057	3697138	2507	3	3	0	0	0	3	0	0	0	1	3	0	0	0
NC_007168.1	279808	Staphylococcus haemolyticus JCSC1435	2697861	1851	1	1	0	0	0	1	0	0	0	1	1	0	0	0
NZ_CP010298.1	1280	Staphylococcus aureus	2872779	1840	0	0	0	0	0	0	0	0	0	1	0	0	0	0
NC_013282.2	693216	Siccibacter turicensis z3032	4599092	3071	2	2	0	0	0	2	0	0	0	1	2	0	0	0
NZ_CP011574.1	548	Enterobacter aerogenes	5138968	3201	2	2	0	0	0	2	0	0	0	0	2	0	0	0
NC_015474.1	342949	Pyrococcus sp. NA2	1861320	1197	1	1	0	0	0	1	0	0	0	1	1	0	0	0
NC_014934.1	688270	Cellulophaga algicola DSM 14237	4888353	3196	4	4	0	0	0	4	0	0	0	1	4	0	0	0
NZ_CP012359.1	1697052	Pseudomonadaceae bacterium C6819	2272143	0	0	0	0	0	0	0	0	0	0	0	0	0	0	0
NZ_CP013146.1	1719	Corynebacterium pseudotuberculosis	2337845	1558	0	0	0	0	0	0	0	0	0	0	0	0	0	0
NC_010079.1	451516	Staphylococcus aureus subsp. aureus USA300_TCH1516	2903081	1956	2	1	0	0	0	1	0	0	0	1	2	0	0	0
NC_020509.1	1248726	Helicobacter pylori OK310	1595436	1023	0	0	0	0	0	0	0	0	0	1	0	0	0	0
NC_015563.1	742013	Delftia sp. Cs1-4	6685842	4261	7	7	0	0	0	4	3	0	0	1	7	0	0	0
NC_021744.1	326425	Lactobacillus helveticus CNRZ32	2225962	1466	4	4	0	0	0	4	0	0	0	1	4	0	0	0
NC_012779.2	634503	Edwardsiella ictaluri 93-146	3812301	2456	0	0	0	0	0	0	0	0	0	0	0	0	0	0
NZ_CP010541.1	1263758	Mycoplasma pneumoniae 51494	816404	497	2	2	0	0	0	2	0	0	0	1	2	0	0	0
NZ_CP009997.1	28152	Yersinia kristensenii	4496569	2870	8	7	0	0	0	0	7	0	0	0	1	0	0	1
NZ_CP002427.1	767456	Lactobacillus helveticus H9	1871119	1206	2	2	0	0	0	2	0	0	0	1	2	0	0	0
NC_007335.2	59920	Prochlorococcus marinus str. NATL2A	1842899	1180	1	1	0	0	0	1	0	0	0	0	0	0	0	0
NC_018140.1	91891	Legionella pneumophila subsp. pneumophila	3492535	2164	0	0	0	0	0	0	0	0	0	0	0	0	0	0
NZ_HG969191.1	38323	Bartonella henselae	1975503	1213	2	2	0	0	0	2	0	0	0	0	2	0	0	0
NC_014212.1	526227	Meiothermus silvanus DSM 9946	3721669	2300	2	2	0	0	0	2	0	0	0	1	2	0	0	0
NC_009675.1	404589	Anaeromyxobacter sp. Fw109-5	5277990	3488	3	2	0	0	0	2	0	0	0	1	2	0	0	0
NC_015571.1	1030843	Porphyromonas gingivalis TDC60	2339898	1512	0	0	0	0	0	0	0	0	0	1	0	0	0	0
NC_016612.1	1006551	Klebsiella oxytoca KCTC 1686	5974109	3783	5	5	0	0	0	5	0	0	0	0	0	0	1	0
NC_009440.1	399549	Metallosphaera sedula DSM 5348	2191517	1358	4	3	0	0	0	3	0	0	0	0	3	0	0	0
NC_012108.1	177437	Desulfobacterium autotrophicum HRM2	5657782	3657	5	5	0	0	0	5	0	0	0	1	5	0	0	0
NC_012438.1	204536	Sulfurihydrogenibium azorense Az-Fu1	1640877	1072	4	3	0	0	0	3	0	0	0	1	3	0	0	0
NZ_CP009925.1	813	Chlamydia trachomatis	1046364	702	0	0	0	0	0	0	0	0	0	0	0	0	0	0
NZ_CP012252.1	244366	Klebsiella variicola	5090052	3304	3	3	0	0	0	0	3	0	0	0	1	0	0	0
NC_000961.1	70601	Pyrococcus horikoshii OT3	1738505	1148	0	0	0	0	0	0	0	0	0	0	0	0	0	0
NZ_CP004388.1	1123366	Thalassospira xiamenensis M-5 = DSM 17429	4768950	3219	3	3	0	0	0	3	0	0	0	1	3	0	0	0
NZ_AP014680.1	1193095	Lactobacillus hokkaidonensis	2400586	1448	1	1	0	0	0	1	0	0	0	1	1	0	0	0
NC_021834.1	1338035	Campylobacter jejuni 32488	1702398	1076	1	1	0	0	0	1	0	0	0	1	1	0	0	0
NZ_CP007581.1	90371	Salmonella enterica subsp. enterica serovar Typhimurium	5025357	3191	2	2	0	0	0	2	0	0	0	1	2	0	0	0
NZ_CP011254.1	47917	Serratia fonticola	6000511	3810	2	2	0	0	0	2	0	0	0	0	0	0	0	0
NC_020966.1	1071753	Chlamydia trachomatis A/363	1051528	696	0	0	0	0	0	0	0	0	0	1	0	0	0	0
NZ_CP008804.1	480	Moraxella catarrhalis	1941566	1238	1	1	0	0	0	1	0	0	0	1	1	0	0	0
NC_011884.1	395961	Cyanothece sp. PCC 7425	5786110	3744	3	3	0	0	0	3	0	0	0	0	0	0	0	0
NC_012962.1	291112	Photorhabdus asymbiotica	5094138	3292	4	4	0	0	0	4	0	0	0	1	4	0	0	0
NC_019745.1	1173026	Gloeocapsa sp. PCC 7428	5882710	3649	4	4	0	0	0	4	0	0	0	1	4	0	0	0
NZ_CP007763.1	224914	Brucella melitensis bv. 1 str. 16M	3294775	2119	4	4	0	0	0	0	1	0	1	0	4	0	0	0
NZ_CP010432.1	1579	Lactobacillus acidophilus	1991969	1265	0	0	0	0	0	0	0	0	0	1	0	0	0	0
NC_008369.1	393011	Francisella tularensis subsp. holarctica OSU18	1895727	1209	0	0	0	0	0	0	0	0	0	0	0	0	0	0
NC_012687.1	672161	Chlamydia trachomatis B/TZ1A828/OT	1044282	700	0	0	0	0	0	0	0	0	0	1	0	0	0	0
NZ_CP007032.1	871968	Desulfitobacterium metallireducens DSM 15288	3176073	2101	2	2	0	0	0	2	0	0	0	1	2	0	0	0
NC_020291.1	931276	Clostridium saccharoperbutylacetonicum N1-4(HMT)	6666445	4209	2	2	0	0	0	2	0	0	0	0	0	0	0	0
NC_021900.1	1076934	Streptococcus lutetiensis 033	1975547	1289	1	1	0	0	0	1	0	0	0	1	1	0	0	0
NZ_CP009693.1	119857	Francisella tularensis subsp. holarctica	1892782	1146	3	1	0	0	0	1	0	0	0	0	2	0	0	0
NC_015856.1	1005048	Collimonas fungivorans Ter331	5186898	3349	4	4	0	0	0	3	1	0	0	1	4	0	0	0
NC_013418.2	600809	Blattabacterium sp. (Periplaneta americana) str. BPLAN	640442	408	1	1	0	0	0	1	0	0	0	0	0	0	0	0
NC_020453.1	1245469	Bradyrhizobium oligotrophicum S58	8264165	5327	5	4	0	1	0	4	0	1	0	1	4	0	1	0
NZ_CP012022.1	1719	Corynebacterium pseudotuberculosis	2325749	1483	2	2	0	0	0	2	0	0	0	1	2	0	0	0
NC_021726.1	1096995	Acinetobacter baumannii BJAB07104	4042229	2486	1	1	0	0	0	1	0	0	0	0	1	0	0	0
NZ_CP009101.1	1773	Mycobacterium tuberculosis	4411515	2781	4	4	0	0	0	0	4	0	0	1	4	0	0	0
NC_009512.1	351746	Pseudomonas putida F1	5959964	3708	3	3	0	0	0	3	0	0	0	0	2	0	0	0
NZ_CP007563.1	1163752	Candidatus Portiera aleyrodidarum MED (Bemisia tabaci)	357461	248	0	0	0	0	0	0	0	0	0	1	0	0	0	0
NZ_CP007332.1	1412570	Salmonella enterica subsp. enterica serovar Enteritidis str. EC20120916	4807994	3035	4	4	0	0	0	4	0	0	0	0	4	0	0	0
NZ_CP009753.1	1133671	Francisella tularensis subsp. tularensis WY-00W4114	1899252	1207	3	3	0	0	0	2	1	0	0	1	3	0	0	0
NZ_CP011955.1	129394	Xanthomonas oryzae pv. oryzicola	4794316	3062	1	1	0	0	0	1	0	0	0	0	1	0	0	0
NZ_CP009559.1	54388	Salmonella enterica subsp. enterica serovar Paratyphi A	4612373	2926	5	5	0	0	0	5	0	0	0	1	5	0	0	0
NC_018485.1	187303	Methylocystis sp. SC2	3773444	2398	3	3	0	0	0	3	0	0	0	1	3	0	0	0
NZ_AFRZ01000001.1	929558	Sulfurimonas gotlandica GD1	2952682	1932	1	1	0	0	0	1	0	0	0	1	1	0	0	0
NC_016914.1	1105100	Rickettsia rickettsii str. Hino	1269837	863	0	0	0	0	0	0	0	0	0	1	0	0	0	0
NC_015676.1	679901	Methanosalsum zhilinae DSM 4017	2138444	1312	3	3	0	0	0	3	0	0	0	1	3	0	0	0
NC_002946.2	242231	Neisseria gonorrhoeae FA 1090	2153922	1399	2	2	0	0	0	1	1	0	0	0	2	0	0	0
NZ_AGIY02000001.1	882090	Methanolinea tarda NOBI-1	2052856	1378	4	4	0	0	0	4	0	0	0	1	4	0	0	0
NZ_CP012171.1	1690248	Arthrobacter sp. LS16	3851242	2479	1	1	0	0	0	1	0	0	0	0	0	0	0	0
NZ_CP009091.1	149539	Salmonella enterica subsp. enterica serovar Enteritidis	4671261	3020	0	0	0	0	0	0	0	0	0	1	0	0	0	0
NC_009725.1	326423	Bacillus methylotrophicus FZB42	3918589	2490	4	4	0	0	0	0	4	0	0	1	4	0	0	0
NZ_CP011347.1	492670	Bacillus methylotrophicus	4006637	2584	1	1	0	0	0	0	1	0	0	1	1	0	0	0
NC_022441.1	1234369	Chlamydia pecorum P787	1106409	711	1	1	0	0	0	1	0	0	0	1	1	0	0	0
NC_022198.1	1348662	Corynebacterium argentoratense DSM 44202	2031902	1248	0	0	0	0	0	0	0	0	0	1	0	0	0	0
NC_012982.1	582402	Hirschia baltica ATCC 49814	3540114	2270	3	3	0	0	0	3	0	0	0	1	3	0	0	0
NC_017309.1	718251	Edwardsiella tarda FL6-60	3728801	2323	1	1	0	0	0	0	1	0	0	1	1	0	0	0
NC_017138.1	1006007	Bacillus megaterium WSH-002	5075293	3233	4	4	0	0	0	4	0	0	0	0	0	0	0	0
NZ_CP010812.1	666	Vibrio cholerae	4077462	2647	1	1	0	0	0	1	0	0	0	1	1	0	0	0
NC_013887.1	644281	Methanocaldococcus sp. FS406-22	1773136	1141	0	0	0	0	0	0	0	0	0	1	0	0	0	0
NC_016605.1	701521	Pediococcus claussenii ATCC BAA-344	1978793	1261	1	1	0	0	0	1	0	0	0	1	1	0	0	0
NC_014837.1	592316	Pantoea sp. At-9b	6312783	4054	4	4	0	0	0	4	0	0	0	0	0	0	0	1
NC_010681.1	398527	Burkholderia phytofirmans PsJN	8214658	5362	1	1	0	0	0	1	0	0	0	1	1	0	0	0
NC_012686.1	580049	Chlamydia trachomatis B/Jali20/OT	1044352	680	2	2	0	0	0	2	0	0	0	0	2	0	0	0
NZ_CP010361.1	573	Klebsiella pneumoniae	5620801	3608	6	6	0	0	0	4	2	0	0	0	6	0	0	0
NZ_CP007027.1	1437856	Mycobacterium tuberculosis H37RvSiena	4410911	2790	2	2	0	0	0	0	2	0	0	0	2	0	0	0
NC_022222.1	1392476	Staphylococcus aureus subsp. aureus 6850	2736560	1779	1	1	0	0	0	1	0	0	0	1	1	0	0	0
NZ_CP010804.1	34021	Candidatus Liberibacter asiaticus	1233514	775	0	0	0	0	0	0	0	0	0	1	0	0	0	0
NZ_CP011931.1	214675	Leptospira interrogans serovar Manilae	4667405	3007	1	1	0	0	0	1	0	0	0	0	1	0	0	0
NC_017254.1	713600	Buchnera aphidicola str. JF98 (Acyrthosiphon pisum)	641771	404	2	2	0	0	0	2	0	0	0	1	2	0	0	0
NC_013422.1	555778	Halothiobacillus neapolitanus c2	2582886	1671	0	0	0	0	0	0	0	0	0	1	0	0	0	0
NZ_CP006704.1	1392005	Comamonas testosteroni TK102	6062703	3824	5	5	0	0	0	5	0	0	0	1	5	0	0	0
NC_009937.1	438753	Azorhizobium caulinodans ORS 571	5369772	3354	1	1	0	0	0	1	0	0	0	1	1	0	0	0
NC_003030.1	272562	Clostridium acetobutylicum ATCC 824	4132880	2671	2	2	0	0	0	2	0	0	0	1	2	0	0	0
NZ_CP008808.1	1240980	Campylobacter fetus subsp. fetus 04/554	1826626	1177	0	0	0	0	0	0	0	0	0	0	0	0	0	0
NC_007946.1	364106	Escherichia coli UTI89	5179971	3448	2	2	0	0	0	2	0	0	0	1	2	0	0	0
NZ_AP014595.1	931202	Candidatus Liberibacter asiaticus str. Ishi-1	1190853	751	0	0	0	0	0	0	0	0	0	1	0	0	0	0
NZ_CP006568.1	2342	Candidatus Sodalis pierantonius str. SOPE	4513140	2848	4	3	0	0	0	3	0	0	0	1	3	0	0	0
NZ_CP007145.1	1227739	Hymenobacter swuensis DY53	5252070	3373	5	5	0	0	0	5	0	0	0	1	5	0	0	0
NC_013851.1	572477	Allochromatium vinosum DSM 180	3669074	2380	2	2	0	0	0	2	0	0	0	1	2	0	0	0
NC_013854.1	137722	Azospirillum sp. B510	7599738	4858	6	5	0	0	0	5	0	0	0	0	0	0	0	0
NZ_ABCY02000001.1	445987	Borrelia valaisiana VS116	1258864	802	0	0	0	0	0	0	0	0	0	0	0	0	0	0
NC_011205.1	439851	Salmonella enterica subsp. enterica serovar Dublin str. CT_02021853	4917459	3051	4	3	0	0	0	3	0	0	0	0	3	0	0	0
NC_015320.1	693661	Archaeoglobus veneficus SNP6	1901943	1192	1	1	0	0	0	1	0	0	0	1	1	0	0	0
NZ_CP010571.1	813	Chlamydia trachomatis	1049505	661	0	0	0	0	0	0	0	0	0	0	0	0	0	0
NZ_CP009300.1	1454382	Bacillus cereus D17	5590358	3480	3	2	0	0	0	1	1	0	0	1	2	0	0	0
NZ_CP007245.1	1412470	Salmonella enterica subsp. enterica serovar Enteritidis str. EC20120008	4711924	2979	5	5	0	0	0	5	0	0	0	0	5	0	0	0
NC_021084.1	1236908	Wolbachia endosymbiont of Drosophila simulans wNo	1301823	822	0	0	0	0	0	0	0	0	0	0	0	0	0	0
NC_012488.1	568819	Listeria monocytogenes serotype 4b str. CLIP 80459	2912690	1849	2	2	0	0	0	1	1	0	0	0	2	0	0	0
NZ_CP011770.1	1348774	Croceicoccus naphthovorans	3863562	2483	2	2	0	0	0	2	0	0	0	1	2	0	0	0
NC_010816.1	205913	Bifidobacterium longum DJO10A	2389526	1547	1	1	0	0	0	1	0	0	0	1	1	0	0	0
NC_006834.1	291331	Xanthomonas oryzae pv. oryzae KACC 10331	4941439	3162	2	2	0	0	0	2	0	0	0	1	2	0	0	0
NC_020888.1	1298593	Thalassolituus oleivorans MIL-1	3920328	2521	5	5	0	0	0	5	0	0	0	1	5	0	0	0
NZ_CP006965.1	582419	Thermococcus paralvinellae	1957742	1208	1	1	0	0	0	1	0	0	0	0	0	0	0	0
NC_016856.1	588858	Salmonella enterica subsp. enterica serovar Typhimurium str. 14028S	4964097	3129	3	3	0	0	0	3	0	0	0	0	3	0	0	0
NZ_CP008929.1	573	Klebsiella pneumoniae	5990738	3806	4	2	0	0	0	2	0	0	0	0	2	1	0	0
NC_008347.1	394221	Maricaulis maris MCS10	3368780	2162	1	1	0	0	0	1	0	0	0	1	1	0	0	0
NC_011593.1	391904	Bifidobacterium longum subsp. infantis ATCC 15697 = JCM 1222 = DSM 20088	2832748	1871	1	1	0	0	0	1	0	0	0	1	1	0	0	0
NC_018720.1	1147128	Bifidobacterium asteroides PRL2011	2167304	1368	2	2	0	0	0	2	0	0	0	1	2	0	0	0
NC_016641.1	985665	Paenibacillus terrae HPL-003	6083395	3898	4	4	0	0	0	4	0	0	0	0	0	0	0	0
NZ_CP007699.1	1403539	Streptomyces lydicus A02	9300149	5899	4	3	0	0	0	3	0	0	0	0	0	0	1	0
NZ_CP011790.1	149539	Salmonella enterica subsp. enterica serovar Enteritidis	4678365	2976	7	7	0	0	0	7	0	0	0	0	7	0	0	0
NZ_CP011394.1	696867	Salmonella enterica subsp. enterica serovar Enteritidis str. 18569	4745329	2971	3	3	0	0	0	3	0	0	0	0	3	0	0	0
NC_014370.1	553174	Prevotella melaninogenica ATCC 25845	3168282	2148	3	3	0	0	0	2	1	0	0	0	1	0	0	0
NZ_CP009598.1	1449979	Bacillus anthracis str. V770-NP-1R	5410397	3454	6	6	0	0	0	1	4	0	1	1	6	0	0	0
NC_018609.1	1228997	Riemerella anatipestifer RA-CH-1	2309519	1486	3	3	0	0	0	3	0	0	0	0	3	0	0	0
NC_016795.1	1104320	Brucella abortus A13334	3286032	2144	1	1	0	0	0	0	0	0	0	0	1	0	0	0
NC_016627.1	720554	[Clostridium] clariflavum DSM 19732	4897678	3150	1	1	0	0	0	1	0	0	0	0	0	0	0	0
NZ_AP014573.1	1445606	Mycobacterium tuberculosis str. Kurono	4415078	2784	1	1	0	0	0	0	1	0	0	1	1	0	0	0
NC_017056.1	1105096	Rickettsia prowazekii str. BuV67-CWPP	1111445	662	0	0	0	0	0	0	0	0	0	0	0	0	0	0
NC_010471.1	349519	Leuconostoc citreum KM20	1896614	1230	0	0	0	0	0	0	0	0	0	0	0	0	0	0
NZ_CP011371.1	413882	[Polyangium] brachysporum	6476147	0	0	0	0	0	0	0	0	0	0	0	0	0	0	0
NC_017526.1	1081095	Legionella pneumophila subsp. pneumophila str. Hextuple_3a	2682626	1721	2	2	0	0	0	2	0	0	0	0	2	0	0	0
NZ_CP009043.1	1244531	Campylobacter iguaniorum	1754638	1044	1	1	0	0	0	1	0	0	0	0	0	0	0	0
NC_017846.1	694569	Aggregatibacter actinomycetemcomitans D7S-1	2309073	1520	2	2	0	0	0	2	0	0	0	1	2	0	0	0
NC_021284.1	1276229	Spiroplasma syrphidicola EA-1	1107344	724	0	0	0	0	0	0	0	0	0	0	0	0	0	0
NC_012892.2	469008	Escherichia coli BL21(DE3)	4558947	2861	5	3	2	0	0	3	2	0	0	1	3	2	0	0
NC_012588.1	427317	Sulfolobus islandicus M.14.25	2608832	1712	2	2	0	0	0	2	0	0	0	1	2	0	0	0
NC_021880.1	1173064	Anaplasma phagocytophilum str. JM	1481598	922	0	0	0	0	0	0	0	0	0	1	0	0	0	0
NC_014217.1	639283	Starkeya novella DSM 506	4765023	3090	3	3	0	0	0	3	0	0	0	1	3	0	0	0
NC_017436.1	759364	Chlamydia trachomatis D-LC	1050013	698	1	1	0	0	0	1	0	0	0	0	1	0	0	0
NZ_AGTD01000001.1	1050617	Escherichia coli UMNF18	5635305	3580	4	0	1	0	0	0	1	0	0	0	2	2	0	0
NZ_CP010778.1	1452	Bacillus atrophaeus	4174830	2765	5	4	0	0	0	4	0	0	0	1	4	0	0	0
NC_014225.1	716544	Waddlia chondrophila WSU 86-1044	2131905	1423	3	3	0	0	0	3	0	0	0	1	3	0	0	0
NZ_CP009968.1	288681	Bacillus cereus E33L	5846781	3710	2	2	0	0	0	1	1	0	0	0	2	0	0	0
NC_016010.1	981368	Xanthomonas axonopodis pv. citrumelo F1	4967469	3155	5	5	0	0	0	2	3	0	0	1	5	0	0	0
NC_013062.1	531844	Flavobacteriaceae bacterium 3519-10	2768102	0	0	0	0	0	0	0	0	0	0	0	0	0	0	0
NC_013892.1	406818	Xenorhabdus bovienii SS-2004	4225498	2707	0	0	0	0	0	0	0	0	0	1	0	0	0	0
NC_021004.1	869312	Streptococcus pneumoniae SPN033038	2133496	1367	1	1	0	0	0	0	1	0	0	1	1	0	0	0
NZ_CP006820.1	1382920	Helicobacter pylori oki102	1633212	991	0	0	0	0	0	0	0	0	0	0	0	0	0	0
NC_021721.1	1318635	Lactobacillus casei LOCK919	3143369	1994	2	2	0	0	0	0	2	0	0	1	2	0	0	0
NC_011420.2	414684	Rhodospirillum centenum SW	4355543	2727	1	1	0	0	0	1	0	0	0	1	1	0	0	0
NC_019896.1	1192196	Bacillus subtilis subsp. subtilis str. BSP1	4043754	2599	1	1	0	0	0	0	1	0	0	0	1	0	0	0
NC_017374.1	985081	Helicobacter pylori 2017	1548238	989	0	0	0	0	0	0	0	0	0	0	0	0	0	0
NC_002516.2	208964	Pseudomonas aeruginosa PAO1	6264404	4003	7	7	0	0	0	6	1	0	0	0	7	0	0	0
NC_015673.1	662755	Corynebacterium resistens DSM 45100	2601311	1676	1	1	0	0	0	1	0	0	0	0	0	0	0	0
NC_008782.1	232721	Acidovorax sp. JS42	4585154	2988	4	4	0	0	0	4	0	0	0	1	4	0	0	0
NZ_CP012300.1	72407	Klebsiella pneumoniae subsp. pneumoniae	5088873	3263	2	2	0	0	0	0	2	0	0	0	1	0	0	0
NZ_CP009448.1	562971	Achromobacter xylosoxidans C54	6131060	3959	2	2	0	0	0	2	0	0	0	1	2	0	0	0
NC_000907.1	71421	Haemophilus influenzae Rd KW20	1830138	1175	0	0	0	0	0	0	0	0	0	0	0	0	0	0
NZ_CP010049.1	1505597	Blochmannia endosymbiont of Camponotus (Colobopsis) obliquus	773940	501	0	0	0	0	0	0	0	0	0	1	0	0	0	0
NZ_AP014648.1	1384459	Methyloceanibacter caenitepidi	3424964	2215	3	3	0	0	0	3	0	0	0	1	3	0	0	0
NC_021237.1	1124983	Pseudomonas protegens CHA0	6867980	4464	2	2	0	0	0	2	0	0	0	1	2	0	0	0
NZ_CP009976.1	1348584	Cellulophaga baltica 18	4635105	2958	2	2	0	0	0	2	0	0	0	1	2	0	0	0
NC_009348.1	382245	Aeromonas salmonicida subsp. salmonicida A449	5040536	3286	1	1	0	0	0	1	0	0	0	0	1	0	0	0
NC_016943.1	1146883	Blastococcus saxobsidens DD2	4875340	3159	4	4	0	0	0	4	0	0	0	1	4	0	0	0
NC_017042.1	1105113	Rickettsia rhipicephali str. 3-7-female6-CWPP	1305467	853	0	0	0	0	0	0	0	0	0	1	0	0	0	0
NC_022600.1	1183438	Gloeobacter kilaueensis JS1	4724791	3020	6	6	0	0	0	6	0	0	0	1	6	0	0	0
NC_013203.1	521095	Atopobium parvulum DSM 20469	1543805	994	0	0	0	0	0	0	0	0	0	1	0	0	0	0
NC_017075.1	983917	Rubrivivax gelatinosus IL144	5043253	3249	3	3	0	0	0	3	0	0	0	1	3	0	0	0
NC_021353.1	1295009	Candidatus Methanomassiliicoccus intestinalis Issoire-Mx1	1931651	1289	3	2	0	0	0	2	0	0	0	1	2	0	0	0
NZ_HG004426.1	688354	Campylobacter fetus subsp. venerealis str. 84-112	1988028	1287	1	1	0	0	0	1	0	0	0	0	1	0	0	0
NZ_CP006908.1	1408283	Clostridium botulinum CDC_1436	4365669	2739	3	3	0	0	0	3	0	0	0	0	2	0	0	0
NZ_CP011512.1	59893	Paenibacillus peoriae	6006533	3903	2	2	0	0	0	1	1	0	0	0	2	0	0	0
NZ_CP012126.1	562	Escherichia coli	4612363	2962	6	3	3	0	0	3	3	0	0	0	3	3	0	0
NC_014408.1	79929	Methanothermobacter marburgensis str. Marburg	1639135	1006	0	0	0	0	0	0	0	0	0	1	0	0	0	0
NC_007958.1	316057	Rhodopseudomonas palustris BisB5	4892717	3241	4	4	0	0	0	4	0	0	0	1	4	0	0	0
NZ_ABYG01000001.1	564419	Chlamydia trachomatis 70s	1046064	686	1	1	0	0	0	1	0	0	0	1	1	0	0	0
NC_004829.2	710127	Mycoplasma gallisepticum str. R(low)	1012800	619	0	0	0	0	0	0	0	0	0	1	0	0	0	0
NC_018642.1	882094	Listeria monocytogenes L312	2912346	1933	1	1	0	0	0	1	0	0	0	1	1	0	0	0
NC_016012.1	1041504	Candidatus Arthromitus sp. SFB-rat-Yit	1515556	949	1	1	0	0	0	1	0	0	0	0	0	0	0	0
NC_014762.1	709032	Sulfuricurvum kujiense DSM 16994	2819357	1767	3	3	0	0	0	3	0	0	0	1	3	0	0	0
NC_021915.1	1224163	Corynebacterium maris DSM 45190	2833547	1853	1	1	0	0	0	1	0	0	0	0	0	0	0	0
NC_007292.1	291272	Candidatus Blochmannia pennsylvanicus str. BPEN	791654	467	0	0	0	0	0	0	0	0	0	0	0	0	0	0
NC_013061.1	485917	Pedobacter heparinus DSM 2366	5167383	3279	0	0	0	0	0	0	0	0	0	1	0	0	0	0
NC_002978.6	163164	Wolbachia endosymbiont of Drosophila melanogaster	1267782	778	0	0	0	0	0	0	0	0	0	1	0	0	0	0
NC_011080.1	423368	Salmonella enterica subsp. enterica serovar Newport str. SL254	5007719	3199	5	4	0	0	0	3	1	0	0	0	4	0	0	0
NC_012563.1	536232	Clostridium botulinum A2 str. Kyoto	4155278	2664	2	2	0	0	0	1	1	0	0	1	2	0	0	0
NC_020246.1	1028566	Sulfolobus acidocaldarius N8	2176362	1431	2	2	0	0	0	2	0	0	0	0	0	0	0	0
NZ_CP007329.2	1412466	Salmonella enterica subsp. enterica serovar Enteritidis str. EC20120002	4679418	2979	2	2	0	0	0	2	0	0	0	1	2	0	0	0
NZ_CP007576.1	1418107	Aeromonas hydrophila pc104A	5023829	3194	4	4	0	0	0	4	0	0	0	1	4	0	0	0
NC_015057.1	1198114	Granulicella tundricola MP5ACTX9	5503984	3512	3	3	0	0	0	3	0	0	0	1	3	0	0	0
NC_017061.1	1155777	Bacillus methylotrophicus YAU B9601-Y2	4242774	2735	2	2	0	0	0	0	2	0	0	1	2	0	0	0
NC_008319.1	64471	Synechococcus sp. CC9311	2606748	1731	1	1	0	0	0	1	0	0	0	1	1	0	0	0
NC_022794.1	1399115	Exiguobacterium sp. MH3	3164195	2008	4	4	0	0	0	4	0	0	0	0	0	0	0	0
NC_015434.1	263358	Verrucosispora maris AB-18-032	6732271	4352	5	5	0	0	0	5	0	0	0	1	5	0	0	0
NC_008148.1	266117	Rubrobacter xylanophilus DSM 9941	3225748	2068	5	5	0	0	0	5	0	0	0	1	5	0	0	0
NC_011060.1	324925	Pelodictyon phaeoclathratiforme BU-1	3018238	1914	2	2	0	0	0	2	0	0	0	1	2	0	0	0
NC_013355.1	622759	Zymomonas mobilis subsp. mobilis NCIMB 11163	2223520	1417	1	1	0	0	0	1	0	0	0	0	0	0	0	0
NZ_LN846980.1	83558	Chlamydia pneumoniae	1228125	793	1	1	0	0	0	1	0	0	0	1	1	0	0	0
NC_015730.1	391595	Roseobacter litoralis Och 149	4745450	3047	1	1	0	0	0	1	0	0	0	1	1	0	0	0
NC_011772.1	405531	Bacillus cereus G9842	5736823	3643	2	2	0	0	0	2	0	0	0	0	1	0	0	0
NZ_CP006019.1	1343739	Palaeococcus pacificus DY20341	1859370	1244	1	1	0	0	0	1	0	0	0	1	1	0	0	0
NC_011296.1	289376	Thermodesulfovibrio yellowstonii DSM 11347	2003803	1287	2	2	0	0	0	2	0	0	0	1	2	0	0	0
NZ_CP006010.1	1337396	Rickettsia rickettsii str. Morgan	1269809	850	1	1	0	0	0	1	0	0	0	1	1	0	0	0
NC_009342.1	340322	Corynebacterium glutamicum R	3363299	2075	0	0	0	0	0	0	0	0	0	0	0	0	0	0
NZ_CM001161.1	992186	Rhodobacter sphaeroides WS8N	4417788	2932	1	0	0	0	0	0	0	0	0	0	0	0	0	0
NC_008313.1	381666	Ralstonia eutropha H16	7416678	4637	3	3	0	0	0	3	0	0	0	1	3	0	0	0
NC_004572.3	203267	Tropheryma whipplei str. Twist	927303	601	0	0	0	0	0	0	0	0	0	1	0	0	0	0
NC_020247.1	1028567	Sulfolobus acidocaldarius Ron12/I	2223983	1448	3	3	0	0	0	3	0	0	0	0	0	0	0	0
NC_022080.4	1345697	Geobacillus sp. JF8	3486308	2313	2	2	0	0	0	2	0	0	0	0	0	0	0	0
NC_009487.1	359786	Staphylococcus aureus subsp. aureus JH9	2937129	1875	3	3	0	0	0	3	0	0	0	1	3	0	0	0
NC_004344.2	36870	Wigglesworthia glossinidia endosymbiont of Glossina brevipalpis	703004	435	0	0	0	0	0	0	0	0	0	1	0	0	0	0
NZ_CP007222.1	1454603	Salmonella enterica subsp. enterica serovar Montevideo str. USDA-ARS-USMARC-1903	4565462	2952	2	2	0	0	0	1	1	0	0	1	2	0	0	0
NZ_CP009608.1	83560	Chlamydia muridarum	1072952	680	1	1	0	0	0	1	0	0	0	0	1	0	0	0
NC_012731.1	484021	Klebsiella pneumoniae subsp. pneumoniae NTUH-K2044	5472672	3540	4	4	0	0	0	4	0	0	0	0	3	0	0	0
NZ_CP012648.1	1302	Streptococcus gordonii	2283306	1492	1	1	0	0	0	1	0	0	0	0	1	0	0	0
NZ_CP009685.1	511145	Escherichia coli str. K-12 substr. MG1655	4636831	3006	5	2	2	0	0	2	2	0	0	1	2	3	0	0
NC_011149.1	454166	Salmonella enterica subsp. enterica serovar Agona str. SL483	4836638	3077	4	4	0	0	0	4	0	0	0	0	3	0	0	0
NC_021355.1	224719	Methanobrevibacter sp. AbM4	1998189	1273	1	1	0	0	0	1	0	0	0	1	1	0	0	0
NC_009802.1	360104	Campylobacter concisus 13826	2099413	1337	1	1	0	0	0	1	0	0	0	0	0	0	0	0
NC_004557.1	212717	Clostridium tetani E88	2873333	1808	1	1	0	0	0	1	0	0	0	1	1	0	0	0
NZ_CP011786.1	1437605	Bifidobacterium actinocoloniiforme DSM 22766	1830060	1138	1	1	0	0	0	1	0	0	0	1	1	0	0	0
NZ_CP009859.1	562	Escherichia coli	5559642	3609	3	2	1	0	0	2	1	0	0	0	1	2	0	0
NZ_CP006636.1	1358422	Escherichia coli PCN061	4901825	3162	7	1	5	1	0	1	5	1	0	1	4	3	0	0
NC_020832.1	1302650	Bacillus subtilis subsp. subtilis str. BAB-1	4021944	2550	3	3	0	0	0	1	2	0	0	1	3	0	0	0
NC_018508.1	1217737	Bacillus thuringiensis HD-789	6334630	4038	5	4	0	0	0	2	2	0	0	1	4	0	0	0
NC_019780.1	13035	Dactylococcopsis salina PCC 8305	3781008	2236	1	1	0	0	0	1	0	0	0	1	1	0	0	0
NC_015733.1	1042876	Pseudomonas putida S16	5984790	3953	3	3	0	0	0	0	2	1	0	1	3	0	0	0
NZ_CP007242.1	1292358	Bacillus amyloliquefaciens KHG19	3953361	2505	1	1	0	0	0	0	1	0	0	1	1	0	0	0
NZ_CP012364.1	1698448	Pseudomonadaceae bacterium E1148	2377259	0	0	0	0	0	0	0	0	0	0	0	0	0	0	0
NZ_CP009614.1	44454	Mycobacterium avium subsp. avium	5011264	3132	5	4	0	0	0	4	0	0	0	0	5	0	0	0
NZ_CP007607.1	570416	Bacillus thuringiensis serovar kurstaki str. YBT-1520	6520413	4134	4	4	0	0	0	2	2	0	0	1	4	0	0	0
NZ_CP012681.1	90371	Salmonella enterica subsp. enterica serovar Typhimurium	5088186	3239	3	3	0	0	0	3	0	0	0	0	3	0	0	0
NC_017353.1	1034809	Staphylococcus lugdunensis N920143	2595888	1709	2	2	0	0	0	2	0	0	0	1	2	0	0	0
NZ_CP012332.1	1391653	Vulgatibacter incomptus	4350553	2779	2	2	0	0	0	2	0	0	0	1	2	0	0	0
NZ_CP007570.1	1311	Streptococcus agalactiae	2243708	1459	0	0	0	0	0	0	0	0	0	0	0	0	0	0
NZ_CP009961.1	1550241	Thermofilum sp. 1807-2	1611988	1063	1	1	0	0	0	1	0	0	0	0	0	0	0	0
NC_018267.1	100901	Wolbachia endosymbiont of Onchocerca ochengi	957990	624	1	1	0	0	0	1	0	0	0	1	1	0	0	0
NC_013037.1	471854	Dyadobacter fermentans DSM 18053	6967790	4462	3	3	0	0	0	3	0	0	0	1	3	0	0	0
NC_002967.9	243275	Treponema denticola ATCC 35405	2843201	1805	1	1	0	0	0	1	0	0	0	0	0	0	0	0
NZ_CP011396.1	935705	Salmonella enterica subsp. enterica serovar Thompson str. ATCC 8391	4690430	2988	2	2	0	0	0	2	0	0	0	1	2	0	0	0
NZ_CP004023.1	1249474	Burkholderia pseudomallei MSHR511	7316085	4642	4	3	0	1	0	0	2	2	0	0	2	0	2	0
NZ_CP009795.1	350701	Burkholderia dolosa AU0158	6409095	4135	3	3	0	0	0	0	2	1	0	1	2	0	0	0
NZ_CP010803.1	1486262	Martelella endophytica	4817335	3093	3	3	0	0	0	3	0	0	0	1	3	0	0	0
NZ_AP014510.1	1408160	Thermotoga profunda AZM34c06	2187612	1414	1	1	0	0	0	1	0	0	0	0	0	0	0	0
NC_004113.1	197221	Thermosynechococcus elongatus BP-1	2593857	1671	1	1	0	0	0	1	0	0	0	1	1	0	0	0
NC_014537.1	572478	Vulcanisaeta distributa DSM 14429	2374137	1546	0	0	0	0	0	0	0	0	0	1	0	0	0	0
NZ_CP013021.1	680279	Agarivorans gilvus	4416600	2830	4	4	0	0	0	4	0	0	0	1	4	0	0	0
NZ_CP011365.1	90371	Salmonella enterica subsp. enterica serovar Typhimurium	4759372	2986	2	2	0	0	0	2	0	0	0	0	2	0	0	0
NC_011244.1	412418	Borrelia recurrentis A1	1242163	849	2	2	0	0	0	0	2	0	0	1	2	0	0	0
NC_016913.1	1105104	Rickettsia rickettsii str. Brazil	1255681	792	0	0	0	0	0	0	0	0	0	1	0	0	0	0
NC_018149.1	1197325	Mycoplasma wenyonii str. Massachusetts	650228	419	0	0	0	0	0	0	0	0	0	1	0	0	0	0
NZ_CP009720.1	1428	Bacillus thuringiensis	5291389	3472	3	3	0	0	0	0	2	1	0	0	3	0	0	0
NC_022665.1	1340847	Streptococcus suis T15	2240234	1385	3	3	0	0	0	3	0	0	0	0	3	0	0	0
NZ_CP012187.1	1597	Lactobacillus paracasei	2973347	1944	3	3	0	0	0	1	2	0	0	1	3	0	0	0
NC_005071.1	74547	Prochlorococcus marinus str. MIT 9313	2410873	1439	5	5	0	0	0	5	0	0	0	0	0	0	0	0
NZ_CP011976.1	1284798	Klebsiella pneumoniae DMC1097	5710688	3621	2	2	0	0	0	2	0	0	0	1	2	0	0	0
NC_022592.1	1341692	Clostridium autoethanogenum DSM 10061	4352205	2721	4	4	0	0	0	2	2	0	0	1	4	0	0	0
NZ_CP007155.1	1449976	Kutzneria albida DSM 43870	9874926	6374	7	7	0	0	0	7	0	0	0	1	7	0	0	0
NZ_CP006714.1	1385941	Bifidobacterium breve NCFB 2258	2315904	1493	2	2	0	0	0	2	0	0	0	0	0	0	0	0
NZ_CP013219.1	264445	Streptomyces hygroscopicus subsp. limoneus	10537932	6714	5	4	0	0	0	4	0	0	0	1	4	0	0	0
NZ_CP011070.1	1580092	Candidatus Nitrosopumilus sp. NF5	1803090	1214	3	2	0	0	0	2	0	0	0	1	2	0	0	0
NC_018585.1	879088	Listeria monocytogenes SLCC2378	2941360	1781	3	3	0	0	0	2	1	0	0	0	3	0	0	0
NC_017491.1	1088720	Lactobacillus rhamnosus ATCC 8530	2960339	1851	0	0	0	0	0	0	0	0	0	0	0	0	0	0
NC_012483.1	240015	Acidobacterium capsulatum ATCC 51196	4127356	2704	1	1	0	0	0	1	0	0	0	1	1	0	0	0
NZ_AP014524.1	1420885	Vibrio cholerae MS6	4030944	2601	4	4	0	0	0	4	0	0	0	0	4	0	0	0
NZ_CP006741.1	1300227	Bifidobacterium longum subsp. longum GT15	2337521	1394	1	1	0	0	0	1	0	0	0	1	1	0	0	0
NC_021885.1	669502	Candidatus Profftella armatura	464857	275	1	0	0	0	0	0	0	0	0	1	0	0	0	0
NC_005835.1	262724	Thermus thermophilus HB27	2127482	1333	1	1	0	0	0	1	0	0	0	1	1	0	0	0
NC_008769.1	410289	Mycobacterium bovis BCG str. Pasteur 1173P2	4374522	2796	2	2	0	0	0	0	2	0	0	0	2	0	0	0
NC_014158.1	521096	Tsukamurella paurometabola DSM 20162	4479724	2998	2	2	0	0	0	2	0	0	0	1	2	0	0	0
NZ_CP010028.1	1182571	Deinococcus swuensis	3531443	2236	4	4	0	0	0	4	0	0	0	1	4	0	0	0
NC_010376.1	334413	Finegoldia magna ATCC 29328	1986740	1209	0	0	0	0	0	0	0	0	0	1	0	0	0	0
NC_013532.1	574556	Anaplasma centrale str. Israel	1206806	762	3	3	0	0	0	1	2	0	0	0	0	0	0	0
NC_014539.1	640512	Burkholderia sp. CCGE1003	7043595	4613	2	2	0	0	0	2	0	0	0	1	2	0	0	0
NC_019897.1	717605	Thermobacillus composti KWC4	4355525	2815	3	3	0	0	0	3	0	0	0	1	3	0	0	0
NZ_CP011117.1	294	Pseudomonas fluorescens	6694199	4266	7	5	0	0	0	5	0	0	0	0	3	0	0	0
NZ_CP011364.1	1578828	Edwardsiella sp. EA181011	3934167	2567	1	1	0	0	0	0	1	0	0	0	0	0	0	0
NC_010501.1	390235	Pseudomonas putida W619	5774330	3685	5	4	0	0	0	4	0	0	0	0	2	0	0	0
NC_020059.1	698761	Rhizobium tropici CIAT 899	6686334	4357	5	5	0	0	0	5	0	0	0	1	5	0	0	0
NZ_CP006632.1	1001989	Escherichia coli PCN033	5156873	3341	0	0	0	0	0	0	0	0	0	0	0	0	0	0
NC_017186.1	713604	Amycolatopsis mediterranei S699	10236779	6535	4	3	0	1	0	3	0	1	0	0	0	0	0	0
NC_010002.1	398578	Delftia acidovorans SPH-1	6767514	4327	7	7	0	0	0	4	3	0	0	1	7	0	0	0
NC_007722.1	314225	Erythrobacter litoralis HTCC2594	3052398	1943	2	1	0	1	0	1	0	1	0	1	1	0	0	0
NC_018622.1	1218356	Chlamydia psittaci WS/RT/E30	1148342	701	2	2	0	0	0	2	0	0	0	1	2	0	0	0
NZ_CP009364.1	1454377	Yersinia frederiksenii Y225	4550894	2973	4	4	0	0	0	0	4	0	0	0	0	0	0	0
NZ_CP011636.1	571	Klebsiella oxytoca	7227285	4620	5	4	1	0	0	4	0	0	1	0	0	0	0	1
NZ_CP007663.1	235	Brucella abortus	3280310	2006	1	1	0	0	0	0	0	0	0	1	1	0	0	0
NC_013714.1	401473	Bifidobacterium dentium Bd1	2636367	1687	2	2	0	0	0	2	0	0	0	0	0	0	0	0
NC_020537.1	1074919	Staphylococcus aureus subsp. aureus ST228	2783022	1833	0	0	0	0	0	0	0	0	0	0	0	0	0	0
NC_016791.1	755731	Clostridium sp. BNL1100	4613747	3010	4	4	0	0	0	4	0	0	0	1	4	0	0	0
NC_002952.2	282458	Staphylococcus aureus subsp. aureus MRSA252	2902619	1817	4	4	0	0	0	3	1	0	0	1	4	0	0	0
NZ_CP004360.1	1296990	Komagataeibacter xylinus E25	3905082	2486	3	3	0	0	0	3	0	0	0	1	3	0	0	0
NC_007503.1	246194	Carboxydothermus hydrogenoformans Z-2901	2401520	1532	3	3	0	0	0	3	0	0	0	1	3	0	0	0
NZ_CP006975.1	1434773	Chlamydia muridarum str. Nigg CM972	1072952	673	0	0	0	0	0	0	0	0	0	1	0	0	0	0
NC_011035.1	521006	Neisseria gonorrhoeae NCCP11945	2236178	1395	0	0	0	0	0	0	0	0	0	1	0	0	0	0
NZ_CP012384.1	53345	Enterococcus durans	3071879	1987	1	1	0	0	0	1	0	0	0	1	1	0	0	0
NC_012791.1	543728	Variovorax paradoxus S110	6754997	4296	2	2	0	0	0	2	0	0	0	1	2	0	0	0
NZ_LM995447.1	29343	[Clostridium] cellulosi	2229578	1432	4	4	0	0	0	4	0	0	0	1	4	0	0	0
NZ_CP011854.1	316	Pseudomonas stutzeri	4650155	2985	4	4	0	0	0	4	0	0	0	1	4	0	0	0
NZ_CP009798.1	339670	Burkholderia ambifaria AMMD	7528578	4896	8	7	0	1	0	6	1	1	0	1	7	1	0	0
NZ_CP008941.1	91604	Candidatus Paracaedibacter acanthamoebae	2485110	1571	3	3	0	0	0	3	0	0	0	1	3	0	0	0
NC_020833.1	1249531	Mannheimia haemolytica USDA-ARS-USMARC-183	2658332	1725	2	2	0	0	0	2	0	0	0	0	2	0	0	0
NZ_CP008801.1	1435461	Escherichia coli KLY	4718545	2972	5	0	4	0	0	0	4	0	0	1	0	4	0	0
NC_017456.1	1009464	Gardnerella vaginalis HMP9231	1726519	1035	0	0	0	0	0	0	0	0	0	1	0	0	0	0
NZ_CP007422.1	1412462	Salmonella enterica subsp. enterica serovar Enteritidis str. EC20090531	4734890	3021	2	2	0	0	0	2	0	0	0	0	2	0	0	0
NZ_CP004379.1	884204	Burkholderia pseudomallei 1026b	7237672	4655	4	4	0	0	0	1	3	0	0	1	4	0	0	0
NZ_CP011494.1	330734	Marinobacter psychrophilus	3998597	2534	3	3	0	0	0	3	0	0	0	0	0	0	0	0
NZ_HG738867.1	1403831	Escherichia coli str. K-12 substr. MC4100	4527247	2943	3	0	3	0	0	0	3	0	0	1	1	2	0	0
NC_017125.1	634455	Acetobacter pasteurianus IFO 3283-22	3339649	2102	2	2	0	0	0	2	0	0	0	1	2	0	0	0
NC_014414.1	314260	Parvularcula bermudensis HTCC2503	2902643	1861	2	2	0	0	0	2	0	0	0	1	2	0	0	0
NZ_CP009407.1	1299325	Mycobacterium abscessus subsp. bolletii 103	5051394	3165	1	1	0	0	0	1	0	0	0	0	1	0	0	0
NZ_CP010848.1	145458	Rathayibacter toxicus	2328288	1551	2	2	0	0	0	2	0	0	0	1	2	0	0	0
NC_020307.1	1267753	Salmonella enterica subsp. enterica serovar Javiana str. CFSAN001992	4675267	2936	4	4	0	0	0	4	0	0	0	1	4	0	0	0
NC_016582.1	749414	Streptomyces bingchenggensis BCW-1	11936683	7611	8	7	0	0	0	6	1	0	0	0	1	1	1	0
NZ_CP011073.1	817	Bacteroides fragilis	5282232	3396	2	2	0	0	0	2	0	0	0	0	2	0	0	0
NC_022239.1	862971	Streptococcus anginosus C238	2233640	1367	3	2	0	0	0	2	0	0	0	1	2	0	0	0
NC_011094.1	439843	Salmonella enterica subsp. enterica serovar Schwarzengrund str. CVM19633	4823887	3033	2	2	0	0	0	2	0	0	0	1	2	0	0	0
NC_017618.1	945704	Streptococcus suis JS14	2137435	1356	2	2	0	0	0	2	0	0	0	1	2	0	0	0
NC_015711.1	483219	Myxococcus fulvus HW-1	9003593	5623	6	6	0	0	0	5	0	1	0	1	6	0	0	0
NZ_CP002882.1	1010835	Mycobacterium tuberculosis BT2	4401899	2825	2	2	0	0	0	0	2	0	0	0	2	0	0	0
NZ_CP005286.1	1223515	Corynebacterium humireducens NBRC 106098 = DSM 45392	2681312	1737	1	1	0	0	0	1	0	0	0	0	0	0	0	0
NC_014365.1	644282	Desulfarculus baarsii DSM 2075	3655731	2358	3	3	0	0	0	3	0	0	0	1	3	0	0	0
NZ_CP012037.1	264	Francisella tularensis subsp. novicida	1898140	1222	2	2	0	0	0	2	0	0	0	0	2	0	0	0
NC_021717.1	1300256	Alteromonas macleodii str. 'Ionian Sea U7'	4442936	2850	2	2	0	0	0	2	0	0	0	1	2	0	0	0
NZ_AP012273.1	1076588	Thiolapillus brandeum	3153637	2011	1	1	0	0	0	1	0	0	0	1	1	0	0	0
NZ_CP010867.1	1311	Streptococcus agalactiae	2092071	1288	1	1	0	0	0	1	0	0	0	1	1	0	0	0
NC_015734.1	979982	Leuconostoc sp. C2	1877273	1187	0	0	0	0	0	0	0	0	0	0	0	0	0	0
NC_007350.1	342451	Staphylococcus saprophyticus subsp. saprophyticus ATCC 15305	2577899	1634	0	0	0	0	0	0	0	0	0	1	0	0	0	0
NC_021831.1	754503	Mycoplasma hyopneumoniae 7422	898495	610	1	1	0	0	0	1	0	0	0	1	1	0	0	0
NZ_CP008889.1	1274	Dermacoccus nishinomiyaensis	3113642	1978	3	3	0	0	0	3	0	0	0	1	3	0	0	0
NZ_CP007593.1	1313	Streptococcus pneumoniae	2287774	1436	4	4	0	0	0	2	2	0	0	1	4	0	0	0
NC_001263.1	243230	Deinococcus radiodurans R1	3284156	2104	2	1	0	0	0	1	0	0	0	1	1	0	0	0
NC_021825.1	1639	Listeria monocytogenes	2981886	1892	0	0	0	0	0	0	0	0	0	0	0	0	0	0
NC_014103.1	592022	Bacillus megaterium DSM 319	5097447	3306	4	4	0	0	0	4	0	0	0	0	0	0	0	0
NZ_CP007778.1	1453988	Campylobacter lari RM16712	1565009	1003	0	0	0	0	0	0	0	0	0	1	0	0	0	0
NC_012416.1	66084	Wolbachia sp. wRi	1445873	896	1	1	0	0	0	0	1	0	0	0	1	0	0	0
NZ_LK021130.1	55601	Vibrio anguillarum	4373835	2800	0	0	0	0	0	0	0	0	0	1	0	0	0	0
NZ_CP009281.1	1536770	Paenibacillus sp. FSL R5-0345	6787172	4369	7	7	0	0	0	7	0	0	0	1	7	0	0	0
NC_014166.1	572480	Arcobacter nitrofigilis DSM 7299	3192235	2025	1	1	0	0	0	1	0	0	0	0	0	0	0	0
NC_023063.1	1423892	Ehrlichia muris AS145	1196717	773	0	0	0	0	0	0	0	0	0	1	0	0	0	0
NZ_CP010050.1	1360	Lactococcus lactis subsp. lactis	2488699	1687	2	2	0	0	0	2	0	0	0	1	2	0	0	0
NZ_CP009242.1	1639	Listeria monocytogenes	2918502	1855	3	3	0	0	0	3	0	0	0	0	2	0	0	0
NZ_CP009280.1	1536769	Paenibacillus sp. FSL P4-0081	8423054	5384	7	7	0	0	0	6	1	0	0	1	7	0	0	0
NC_017568.1	984892	Staphylococcus pseudintermedius ED99	2572216	1593	3	3	0	0	0	3	0	0	0	1	3	0	0	0
NC_015574.1	868131	Methanobacterium paludis	2546541	1685	2	2	0	0	0	2	0	0	0	0	0	0	0	0
NZ_CP009610.1	727	Haemophilus influenzae	1850897	1153	1	1	0	0	0	1	0	0	0	1	1	0	0	0
NZ_CP006851.1	1408176	Campylobacter jejuni subsp. jejuni F38011	1691939	1087	0	0	0	0	0	0	0	0	0	1	0	0	0	0
NC_018608.1	1229492	Staphylococcus aureus 08BA02176	2782313	1751	0	0	0	0	0	0	0	0	0	0	0	0	0	0
NZ_CP007446.1	1196094	Snodgrassella alvi wkB2	2527978	1621	1	1	0	0	0	1	0	0	0	1	1	0	0	0
NZ_CP009838.1	630	Yersinia enterocolitica	4603945	2980	5	5	0	0	0	5	0	0	0	0	4	0	0	0
NC_006512.1	283942	Idiomarina loihiensis L2TR	2839318	1761	3	3	0	0	0	3	0	0	0	1	3	0	0	0
NC_002662.1	272623	Lactococcus lactis subsp. lactis Il1403	2365589	1489	0	0	0	0	0	0	0	0	0	0	0	0	0	0
NC_017068.1	927704	Selenomonas ruminantium subsp. lactilytica TAM6421	3631933	2420	3	3	0	0	0	3	0	0	0	1	3	0	0	0
NC_017039.1	1080230	Synechocystis sp. PCC 6803 substr. PCC-P	3570114	2235	3	3	0	0	0	3	0	0	0	1	3	0	0	0
NZ_CP009514.1	1434113	Methanosarcina mazei C16	4166241	2592	2	2	0	0	0	2	0	0	0	1	2	0	0	0
NZ_LM997412.1	875453	Peptoniphilus sp. 1-1	1601846	982	0	0	0	0	0	0	0	0	0	1	0	0	0	0
NZ_CP009436.1	28110	Francisella philomiragia	2049711	1279	1	1	0	0	0	1	0	0	0	0	1	0	0	0
NC_016023.1	345219	Bacillus coagulans 36D1	3552226	2273	2	2	0	0	0	2	0	0	0	0	1	0	0	0
NZ_CP008922.1	1719	Corynebacterium pseudotuberculosis	2338139	1488	1	1	0	0	0	1	0	0	0	0	1	0	0	0
NC_017248.1	1029825	Brucella melitensis NI	3294475	2095	0	0	0	0	0	0	0	0	0	1	0	0	0	0
NZ_CP010975.1	914150	Kangiella geojedonensis	2495242	1553	3	3	0	0	0	3	0	0	0	1	3	0	0	0
NC_000913.3	511145	Escherichia coli str. K-12 substr. MG1655	4641652	2960	1	0	1	0	0	0	1	0	0	0	1	0	0	0
NZ_CP008834.1	28450	Burkholderia pseudomallei	7231385	4594	5	5	0	0	0	1	4	0	0	1	5	0	0	0
NC_012472.1	572264	Bacillus cereus 03BB102	5449308	3534	3	3	0	0	0	0	3	0	0	1	3	0	0	0
NC_020419.1	471821	uncultured Termite group 1 bacterium phylotype Rs-D17	1148570	0	0	0	0	0	0	0	0	0	0	0	0	0	0	0
NC_017581.1	1051074	Streptococcus thermophilus JIM 8232	1929905	1243	0	0	0	0	0	0	0	0	0	1	0	0	0	0
NC_015315.1	999630	Thermoproteus uzoniensis 768-20	1936063	1282	0	0	0	0	0	0	0	0	0	1	0	0	0	0
NC_003912.7	195099	Campylobacter jejuni RM1221	1777831	1151	2	2	0	0	0	2	0	0	0	1	2	0	0	0
NC_017121.1	634454	Acetobacter pasteurianus IFO 3283-07	3338426	2167	0	0	0	0	0	0	0	0	0	1	0	0	0	0
NZ_CP012687.1	305	Ralstonia solanacearum	5411683	3555	3	3	0	0	0	3	0	0	0	0	3	0	0	0
NC_015145.1	930171	Arthrobacter phenanthrenivorans Sphe3	4535320	2859	0	0	0	0	0	0	0	0	0	1	0	0	0	0
NZ_CP009850.1	550	Enterobacter cloacae	4946444	3077	4	4	0	0	0	4	0	0	0	0	1	0	1	0
NZ_CP010438.1	83333	Escherichia coli K-12	4619729	2970	3	0	3	0	0	0	3	0	0	0	1	2	0	0
NC_014804.1	391623	Thermococcus barophilus MP	2064237	1316	3	3	0	0	0	3	0	0	0	0	0	0	1	0
NZ_CP011447.1	520	Bordetella pertussis	4109548	2633	1	1	0	0	0	0	1	0	0	0	1	0	0	0
NZ_CP000574.1	427140	Leuconostoc mesenteroides KFRI-MG	1896413	1199	3	1	0	0	0	1	0	0	0	0	0	0	0	0
NC_021026.1	869306	Streptococcus pneumoniae SPN994038	2026239	1279	4	4	0	0	0	2	2	0	0	0	3	0	0	0
NC_018623.1	1218357	Chlamydia psittaci M56	1168938	728	0	0	0	0	0	0	0	0	0	1	0	0	0	0
NZ_AP012327.1	1150460	Bifidobacterium kashiwanohense JCM 15439 = DSM 21854	2337234	1522	3	3	0	0	0	1	2	0	0	0	0	0	1	0
NC_016749.1	1116231	Streptococcus macedonicus ACA-DC 198	2142762	1333	1	1	0	0	0	1	0	0	0	1	1	0	0	0
NC_017366.1	102608	Helicobacter pylori F32	1581461	1003	2	2	0	0	0	2	0	0	0	1	2	0	0	0
NC_017534.1	909952	Propionibacterium acnes 266	2494578	1653	0	0	0	0	0	0	0	0	0	1	0	0	0	0
NC_017960.1	333849	Enterococcus faecium DO	3052572	2030	1	1	0	0	0	1	0	0	0	0	1	0	0	0
NC_013523.1	479434	Sphaerobacter thermophilus DSM 20745	3993764	2599	4	4	0	0	0	4	0	0	0	1	4	0	0	0
NZ_CP007521.1	2113	Mycoplasma californicum	793841	532	1	0	0	0	0	0	0	0	0	1	0	0	0	0
NC_010321.1	340099	Thermoanaerobacter pseudethanolicus ATCC 33223	2362816	1482	1	0	1	0	0	0	1	0	0	0	0	1	0	0
NC_007086.1	314565	Xanthomonas campestris pv. campestris str. 8004	5148708	3316	2	2	0	0	0	2	0	0	0	1	2	0	0	0
NC_010730.1	436114	Sulfurihydrogenibium sp. YO3AOP1	1838442	1178	0	0	0	0	0	0	0	0	0	1	0	0	0	0
NC_006300.1	221988	Mannheimia succiniciproducens MBEL55E	2314078	1460	0	0	0	0	0	0	0	0	0	1	0	0	0	0
NZ_CP007501.1	576611	Polynucleobacter necessarius subsp. asymbioticus	2026292	1279	0	0	0	0	0	0	0	0	0	1	0	0	0	0
NC_015875.1	1054460	Streptococcus pseudopneumoniae IS7493	2195458	1429	1	1	0	0	0	0	1	0	0	1	1	0	0	0
NC_014323.1	757424	Herbaspirillum seropedicae SmR1	5513887	3565	3	3	0	0	0	3	0	0	0	1	3	0	0	0
NC_017274.1	555311	Sulfolobus solfataricus 98/2	2668974	1698	4	4	0	0	0	4	0	0	0	0	4	0	0	0
NZ_CP007026.1	1410606	Candidatus Nitrosopelagicus brevis	1232128	807	0	0	0	0	0	0	0	0	0	1	0	0	0	0
NZ_CP009165.1	1439855	Burkholderia pseudomallei A79A	7272441	4657	4	4	0	0	0	1	2	0	1	1	4	0	0	0
NC_022443.1	1194085	Staphylococcus aureus subsp. aureus SA40	2728308	1706	0	0	0	0	0	0	0	0	0	0	0	0	0	0
NC_015318.1	760142	Hippea maritima DSM 10411	1694430	1112	1	1	0	0	0	1	0	0	0	1	1	0	0	0
NC_021670.1	1321369	Staphylococcus aureus Bmb9393	2983456	1956	5	5	0	0	0	5	0	0	0	0	5	0	0	0
NC_013530.1	446471	Xylanimonas cellulosilytica DSM 15894	3831380	2477	5	4	0	0	0	4	0	0	0	1	4	0	0	0
NC_013132.1	485918	Chitinophaga pinensis DSM 2588	9127347	5834	6	5	0	0	0	5	0	0	0	1	6	0	0	0
NZ_CP009361.1	46170	Staphylococcus aureus subsp. aureus	2806345	1812	0	0	0	0	0	0	0	0	0	0	0	0	0	0
NZ_CP008706.1	470	Acinetobacter baumannii	4066980	2672	4	4	0	0	0	4	0	0	0	1	4	0	0	0
NZ_CP007215.1	1235834	Kosakonia sacchari SP1	4902024	3140	4	3	0	1	0	3	0	1	0	1	3	0	1	0
NC_007517.1	269799	Geobacter metallireducens GS-15	4011182	2592	1	1	0	0	0	1	0	0	0	0	0	0	0	0
NZ_CP012120.1	46170	Staphylococcus aureus subsp. aureus	2926535	1945	1	1	0	0	0	1	0	0	0	0	1	0	0	0
NZ_CP009762.1	1295	Staphylococcus schleiferi	2419762	1580	2	2	0	0	0	2	0	0	0	0	0	0	0	0
NZ_CP007060.1	751944	Halobacterium sp. DL1	3162560	2006	4	3	0	0	0	3	0	0	0	0	0	0	0	0
NC_010473.1	316385	Escherichia coli str. K-12 substr. DH10B	4686137	2984	2	1	1	0	0	1	1	0	0	0	0	2	0	0
NC_017546.1	393126	Listeria monocytogenes FSL R2-561	2973801	1919	2	2	0	0	0	2	0	0	0	1	2	0	0	0
NC_008554.1	335543	Syntrophobacter fumaroxidans MPOB	4990251	3263	3	2	0	0	0	2	0	0	0	1	3	0	0	0
NC_012997.1	377629	Teredinibacter turnerae T7901	5193164	3290	3	3	0	0	0	3	0	0	0	1	3	0	0	0
NC_008526.1	321967	Lactobacillus casei ATCC 334	2924325	1942	3	3	0	0	0	0	3	0	0	1	3	0	0	0
NC_018747.1	1234596	Borrelia garinii NMJW1	902789	576	1	1	0	0	0	0	1	0	0	1	1	0	0	0
NC_011274.1	550538	Salmonella enterica subsp. enterica serovar Gallinarum str. 287/91	4658697	2877	3	3	0	0	0	3	0	0	0	0	3	0	0	0
NZ_CP007161.1	403957	Virgibacillus sp. SK37	3841730	2545	3	3	0	0	0	3	0	0	0	1	3	0	0	0
NZ_CP011301.1	292	Burkholderia cepacia	6423680	4125	5	4	0	0	0	0	4	0	0	1	4	0	0	0
NC_014011.1	572547	Aminobacterium colombiense DSM 12261	1980592	1327	0	0	0	0	0	0	0	0	0	1	0	0	0	0
NC_015567.1	768492	Serratia plymuthica AS9	5442880	3544	6	6	0	0	0	0	6	0	0	1	6	0	0	0
NC_006814.3	272621	Lactobacillus acidophilus NCFM	1993560	1288	0	0	0	0	0	0	0	0	0	1	0	0	0	0
NC_022130.1	1352356	Helicobacter pylori SouthAfrica20	1622903	1034	4	4	0	0	0	4	0	0	0	1	4	0	0	0
NC_013522.1	525903	Thermanaerovibrio acidaminovorans DSM 6589	1848474	1179	3	3	0	0	0	3	0	0	0	1	3	0	0	0
NC_015725.1	956483	Mycoplasma bovis Hubei-1	948121	628	0	0	0	0	0	0	0	0	0	1	0	0	0	0
NZ_HG938370.1	1055524	Burkholderia cenocepacia H111	7714893	4908	7	7	0	0	0	3	4	0	0	1	7	0	0	0
NC_020829.1	1294143	Pseudomonas denitrificans ATCC 13867	5696307	3520	4	4	0	0	0	4	0	0	0	1	4	0	0	0
NZ_CP011096.1	1267001	Mycoplasma synoviae ATCC 25204	846495	490	1	1	0	0	0	1	0	0	0	0	0	0	0	0
NC_019960.1	908937	Prevotella dentalis DSM 3688	3350206	2086	1	1	0	0	0	1	0	0	0	0	0	0	0	0
NC_017538.1	1031710	Oligotropha carboxidovorans OM4	3839771	2400	1	1	0	0	0	1	0	0	0	0	1	0	0	0
NC_018518.1	568706	Bordetella pertussis 18323	4043846	2627	3	3	0	0	0	0	3	0	0	0	3	0	0	0
NC_009445.1	114615	Bradyrhizobium sp. ORS 278	7456587	4771	4	4	0	0	0	4	0	0	0	0	1	1	0	0
NC_021177.1	1303692	Streptomyces fulvissimus DSM 40593	7905758	5076	5	5	0	0	0	5	0	0	0	1	5	0	0	0
NZ_CP009455.1	157783	Pseudomonas cremoricolorata	4780403	3089	4	3	0	0	0	3	0	0	0	1	3	0	0	0
NZ_HG322950.1	1301098	Pseudomonas knackmussii B13	6162905	3875	0	0	0	0	0	0	0	0	0	0	0	0	0	0
NC_008532.1	322159	Streptococcus thermophilus LMD-9	1864178	1202	2	2	0	0	0	2	0	0	0	0	1	0	0	0
NC_014761.1	670487	Oceanithermus profundus DSM 14977	2439291	1567	2	2	0	0	0	2	0	0	0	1	2	0	0	0
NC_016621.1	1075399	Blattabacterium sp. (Cryptocercus punctulatus) str. Cpu	609561	417	0	0	0	0	0	0	0	0	0	1	0	0	0	0
NZ_CP010852.1	1392	Bacillus anthracis	5477055	3478	3	3	0	0	0	1	1	0	1	0	3	0	0	0
NZ_CP009086.1	149539	Salmonella enterica subsp. enterica serovar Enteritidis	4678377	2985	2	2	0	0	0	2	0	0	0	0	2	0	0	0
NC_017473.1	999378	Lactobacillus casei LC2W	3077434	1968	2	2	0	0	0	0	2	0	0	1	2	0	0	0
NC_009831.1	425104	Shewanella sediminis HAW-EB3	5517674	3560	3	3	0	0	0	3	0	0	0	1	3	0	0	0
NZ_CP010820.1	28031	Lysinibacillus fusiformis	4843789	3097	1	1	0	0	0	1	0	0	0	1	1	0	0	0
NZ_CP010434.1	96241	Bacillus subtilis subsp. spizizenii	4027672	2605	3	3	0	0	0	2	1	0	0	1	3	0	0	0
NZ_HG813249.1	1288295	Listeria monocytogenes 6179	3072826	1956	1	1	0	0	0	1	0	0	0	0	1	0	0	0
NZ_CP011346.1	492670	Bacillus methylotrophicus	4105955	2628	5	5	0	0	0	0	5	0	0	0	5	0	0	0
NC_010163.1	441768	Acholeplasma laidlawii PG-8A	1496992	942	0	0	0	0	0	0	0	0	0	0	0	0	0	0
NC_018586.1	879089	Listeria monocytogenes SLCC2540	2976958	1944	2	2	0	0	0	2	0	0	0	0	2	0	0	0
NC_015953.1	862751	Streptomyces sp. SirexAA-E	7414440	4893	8	8	0	0	0	8	0	0	0	0	1	0	0	0
NZ_CP006953.1	1434215	Mannheimia varigena USDA-ARS-USMARC-1388	2228291	1392	4	3	0	0	0	3	0	0	0	1	3	0	0	0
NC_021739.1	1311760	Mannheimia haemolytica D174	2702201	1735	2	2	0	0	0	2	0	0	0	1	2	0	0	0
NZ_ABYF01000001.1	564418	Chlamydia trachomatis 70	1048006	690	0	0	0	0	0	0	0	0	0	0	0	0	0	0
NC_020546.1	1254439	Bifidobacterium thermophilum RBL67	2291643	1506	1	1	0	0	0	1	0	0	0	1	1	0	0	0
NC_008149.1	377628	Yersinia pestis Nepal516	4646286	2958	6	6	0	0	0	1	4	1	0	0	6	0	0	0
NC_014727.1	767455	Lactobacillus delbrueckii subsp. bulgaricus ND02	2131976	1315	3	2	0	0	0	2	0	0	0	0	1	0	0	0
NC_017517.1	935588	Neisseria meningitidis M01-240355	2287777	1433	0	0	0	0	0	0	0	0	0	0	0	0	0	0
NC_009785.1	467705	Streptococcus gordonii str. Challis substr. CH1	2196662	1446	1	1	0	0	0	1	0	0	0	1	1	0	0	0
NC_010084.1	395019	Burkholderia multivorans ATCC 17616	7008622	4487	3	2	1	0	0	2	1	0	0	0	0	0	1	0
NC_021283.1	1116211	Mycoplasma hyopneumoniae 168-L	921093	581	2	2	0	0	0	2	0	0	0	0	1	0	0	0
NC_019905.1	1215088	Pseudomonas putida HB3267	5956110	3849	3	3	0	0	0	2	0	0	0	0	2	0	0	0
NC_006156.1	290434	Borrelia bavariensis PBi	986914	618	1	1	0	0	0	0	1	0	0	0	1	0	0	0
NC_020519.1	1204414	Corynebacterium glutamicum K051	3309400	2107	3	3	0	0	0	1	2	0	0	0	3	0	0	0
NC_007644.1	264732	Moorella thermoacetica ATCC 39073	2628784	1645	2	2	0	0	0	2	0	0	0	1	2	0	0	0
NC_010465.1	502800	Yersinia pseudotuberculosis YPIII	4689441	3056	3	3	0	0	0	1	2	0	0	1	3	0	0	0
NZ_CP009494.1	246196	Mycobacterium smegmatis str. MC2 155	6988269	4471	7	7	0	0	0	6	1	0	0	1	7	0	0	0
NZ_CP012868.1	511145	Escherichia coli str. K-12 substr. MG1655	4641665	2998	1	0	0	1	0	0	0	1	0	1	1	0	0	0
NZ_CP011386.1	1587	Lactobacillus helveticus	2084058	1316	0	0	0	0	0	0	0	0	0	0	0	0	0	0
NZ_CP011401.1	520	Bordetella pertussis	4100705	2656	2	2	0	0	0	1	1	0	0	0	2	0	0	0
NZ_CP007221.1	129394	Xanthomonas oryzae pv. oryzicola	5080102	3331	3	3	0	0	0	3	0	0	0	0	3	0	0	0
NC_010125.1	272568	Gluconacetobacter diazotrophicus PA1 5	3999591	2614	3	3	0	0	0	3	0	0	0	1	3	0	0	0
NZ_CP012837.1	1719	Corynebacterium pseudotuberculosis	2335107	1472	2	2	0	0	0	2	0	0	0	1	2	0	0	0
NC_021194.1	1310115	Mycobacterium tuberculosis EAI5/NITR206	4390306	2679	3	3	0	0	0	0	3	0	0	0	3	0	0	0
NZ_AP013354.1	1391726	Helicobacter pylori 26695-1	1667638	1075	0	0	0	0	0	0	0	0	0	0	0	0	0	0
NC_007984.1	374463	Baumannia cicadellinicola str. Hc (Homalodisca coagulata)	686194	0	0	0	0	0	0	0	0	0	0	0	0	0	0	0
NC_017367.1	866346	Helicobacter pylori F57	1609006	937	1	1	0	0	0	1	0	0	0	0	0	0	0	0
NC_014960.1	926569	Anaerolinea thermophila UNI-1	3532378	2199	2	2	0	0	0	2	0	0	0	1	2	0	0	0
NC_021890.1	907269	Chlamydia trachomatis RC-F(s)/342	1083842	651	0	0	0	0	0	0	0	0	0	0	0	0	0	0
NC_017322.1	698936	Sinorhizobium meliloti BL225C	6978785	4490	3	3	0	0	0	3	0	0	0	1	3	0	0	0
NZ_CP007473.1	1249651	Ehrlichia chaffeensis str. Heartland	1172721	737	1	1	0	0	0	1	0	0	0	0	1	0	0	0
NC_010364.1	478009	Halobacterium salinarum R1	2668776	1668	1	1	0	0	0	1	0	0	0	1	1	0	0	0
NZ_CP011339.1	1638788	Microcystis panniformis FACHB-1757	5686839	3631	2	1	0	0	0	0	1	0	0	1	2	0	0	0
NC_017384.1	759362	Ketogulonicigenium vulgare WSH-001	3277101	2042	2	2	0	0	0	2	0	0	0	1	2	0	0	0
NC_017044.1	1105108	Rickettsia parkeri str. Portsmouth	1300386	802	3	3	0	0	0	0	0	1	0	1	3	0	0	0
NC_003911.12	246200	Ruegeria pomeroyi DSS-3	4601048	2990	4	4	0	0	0	4	0	0	0	1	4	0	0	0
NZ_CP007719.1	520487	Brucella suis bv. 3 str. 686	3297260	2129	3	3	0	0	0	0	1	0	0	0	3	0	0	0
NZ_CP011966.1	1428454	Clostridium pasteurianum NRRL B-598	6186879	3945	3	3	0	0	0	2	1	0	0	0	0	0	0	0
NC_016941.1	985002	Staphylococcus argenteus	2787638	1802	0	0	0	0	0	0	0	0	0	0	0	0	0	0
NZ_CP007523.1	1454642	Salmonella enterica subsp. enterica serovar Typhimurium str. CDC 2011K-0870	4769471	3047	2	1	0	0	0	1	0	0	0	0	1	0	0	0
NZ_CP011444.1	520	Bordetella pertussis	4106388	2564	2	2	0	0	0	1	1	0	0	1	2	0	0	0
NZ_LK936442.1	28450	Burkholderia pseudomallei	7161665	4584	2	2	0	0	0	1	1	0	0	1	2	0	0	0
NZ_CP006829.1	1208320	Thalassolituus oleivorans R6-15	3764053	2368	1	1	0	0	0	1	0	0	0	1	1	0	0	0
NZ_CP007670.1	1280	Staphylococcus aureus	2916552	1814	1	1	0	0	0	1	0	0	0	0	1	0	0	0
NC_013198.1	568703	Lactobacillus rhamnosus GG	3010111	1967	3	3	0	0	0	3	0	0	0	0	0	0	0	0
NC_021235.1	767453	Lactobacillus fermentum F-6	2064620	1307	0	0	0	0	0	0	0	0	0	0	0	0	0	0
NC_021352.1	1232383	Corynebacterium glutamicum SCgG2	3350619	2155	2	2	0	0	0	2	0	0	0	1	2	0	0	0
NC_021172.1	670307	Hyphomicrobium denitrificans 1NES1	3808687	2350	2	2	0	0	0	2	0	0	0	1	2	0	0	0
NZ_CP009470.1	1295	Staphylococcus schleiferi	2435632	1523	3	3	0	0	0	3	0	0	0	0	1	0	0	0
NZ_CP006762.1	1345704	Yersinia pestis 1413	4736923	2979	2	2	0	0	0	0	2	0	0	1	2	0	0	0
NC_017440.1	707187	Chlamydia trachomatis G/11074	1042875	669	0	0	0	0	0	0	0	0	0	0	0	0	0	0
NZ_CP009422.1	487	Neisseria meningitidis	2183230	1400	0	0	0	0	0	0	0	0	0	0	0	0	0	0
NC_003197.1	99287	Salmonella enterica subsp. enterica serovar Typhimurium str. LT2	4951371	3228	3	3	0	0	0	3	0	0	0	0	3	0	0	0
NC_017161.1	608538	Hydrogenobacter thermophilus TK-6	1742932	1094	1	1	0	0	0	1	0	0	0	1	1	0	0	0
NC_011766.1	490899	Desulfurococcus kamchatkensis 1221n	1365223	878	0	0	0	0	0	0	0	0	0	1	0	0	0	0
NC_014147.1	1236608	Moraxella catarrhalis BBH18	1863286	1204	1	1	0	0	0	1	0	0	0	1	1	0	0	0
NC_014448.1	872331	Mycoplasma hyorhinis HUB-1	839615	546	0	0	0	0	0	0	0	0	0	1	0	0	0	0
NC_012029.1	416348	Halorubrum lacusprofundi ATCC 49239	3692576	2357	2	1	1	0	0	1	1	0	0	1	2	0	0	0
NC_014100.1	509190	Caulobacter segnis ATCC 21756	4655622	2987	1	1	0	0	0	1	0	0	0	0	0	0	0	0
NC_021741.1	1346614	Serratia liquefaciens ATCC 27592	5282719	3390	3	3	0	0	0	3	0	0	0	1	3	0	0	0
NC_023013.1	1417673	Haloarcula hispanica N601	3901495	2405	1	1	0	0	0	0	1	0	0	1	1	0	0	0
NZ_CP009863.1	72407	Klebsiella pneumoniae subsp. pneumoniae	5520596	3570	5	5	0	0	0	2	2	1	0	1	5	0	0	0
NZ_CP009679.1	492670	Bacillus methylotrophicus	4014440	2502	4	4	0	0	0	1	3	0	0	0	4	0	0	0
NZ_CP007274.1	1412475	Salmonella enterica subsp. enterica serovar Enteritidis str. SA20093266	4746767	3005	2	2	0	0	0	2	0	0	0	1	2	0	0	0
NC_017644.1	1033813	Escherichia coli NA114	4971461	3148	4	3	1	0	0	3	1	0	0	0	4	0	0	0
NC_010524.1	395495	Leptothrix cholodnii SP-6	4909403	3200	4	4	0	0	0	4	0	0	0	1	4	0	0	0
NZ_HG941718.1	1359206	Escherichia coli ST131	5249449	3444	3	2	1	0	0	2	1	0	0	1	3	0	0	0
NC_018073.1	591365	Streptococcus intermedius JTH08	1933610	1247	1	1	0	0	0	1	0	0	0	1	1	0	0	0
NZ_CP009928.1	1324352	Chryseobacterium gallinarum	4633632	3019	3	3	0	0	0	3	0	0	0	1	3	0	0	0
NC_016610.1	203275	Tannerella forsythia 92A2	3405521	2163	1	1	0	0	0	1	0	0	0	1	1	0	0	0
NC_019974.1	694430	Natronococcus occultus SP4	4314118	2757	4	3	0	0	0	3	0	0	0	1	3	0	0	0
NC_015744.1	887712	Chlamydia trachomatis L2c	1038313	669	1	1	0	0	0	1	0	0	0	0	1	0	0	0
NC_015185.1	868864	Desulfurobacterium thermolithotrophum DSM 11699	1541968	1047	2	1	0	0	0	1	0	0	0	1	1	0	0	0
NC_021893.1	1007870	Chlamydia trachomatis RC-L2/55	1038870	657	1	1	0	0	0	1	0	0	0	0	1	0	0	0
NZ_AP012334.1	1150468	Scardovia inopinata JCM 12537	1797862	1181	2	2	0	0	0	2	0	0	0	1	2	0	0	0
NC_019396.1	1224746	Gluconobacter oxydans H24	3816232	2487	5	5	0	0	0	5	0	0	0	1	5	0	0	0
NZ_CP009125.1	29471	Pectobacterium atrosepticum	5024250	3234	2	2	0	0	0	2	0	0	0	1	2	0	0	0
NZ_LK028559.1	35623	Acholeplasma oculi	1587120	992	0	0	0	0	0	0	0	0	0	1	0	0	0	0
NZ_CP007738.1	235	Brucella abortus	3288158	2055	1	1	0	0	0	0	0	0	0	1	1	0	0	0
NZ_CP011256.1	339	Xanthomonas campestris	5254865	3345	1	1	0	0	0	1	0	0	0	0	1	0	0	0
NZ_CM001467.1	1144888	Rickettsia helvetica C9P9	1417115	900	1	1	0	0	0	0	1	0	0	0	0	0	0	0
NZ_CP007441.1	316	Pseudomonas stutzeri	4731359	2973	5	5	0	0	0	5	0	0	0	1	5	0	0	0
NC_017593.1	869216	Streptococcus pneumoniae INV200	2093317	1298	1	1	0	0	0	1	0	0	0	0	1	0	0	0
NC_017769.2	1130804	Streptococcus pneumoniae ST556	2150813	1322	1	1	0	0	0	1	0	0	0	1	1	0	0	0
NC_020518.1	1110693	Escherichia coli str. K-12 substr. MDS42	3976195	2605	2	0	1	0	0	0	1	0	0	1	1	1	0	0
NC_015696.1	573569	Francisella sp. TX077308	2035931	1198	1	1	0	0	0	1	0	0	0	1	1	0	0	0
NZ_AP012555.1	1229671	Mycobacterium avium subsp. hominissuis TH135	5145928	3300	0	0	0	0	0	0	0	0	0	0	0	0	0	0
NC_014171.1	714359	Bacillus thuringiensis BMB171	5643051	3568	4	4	0	0	0	2	2	0	0	1	4	0	0	0
NC_021057.1	1234603	Candidatus Moranella endobia PCVAL	538203	345	0	0	0	0	0	0	0	0	0	1	0	0	0	0
NZ_CP009447.1	319705	Mycobacterium abscessus subsp. bolletii	4501725	2827	1	0	0	0	0	0	0	0	0	1	0	0	0	0
NC_018939.1	85962	Helicobacter pylori 26695	1667892	1088	2	2	0	0	0	2	0	0	0	1	2	0	0	0
NC_004369.1	196164	Corynebacterium efficiens YS-314	3219505	2075	1	0	0	1	0	0	0	1	0	1	1	0	0	0
NC_016779.1	347495	Bacillus cereus F837/76	5288498	3451	2	2	0	0	0	0	2	0	0	0	2	0	0	0
NZ_CP010289.1	119857	Francisella tularensis subsp. holarctica	1894186	1203	0	0	0	0	0	0	0	0	0	1	0	0	0	0
NC_013411.1	544556	Geobacillus sp. Y412MC61	3667901	2438	2	2	0	0	0	0	0	0	0	1	2	0	0	0
NZ_CP010284.1	858307	Salmonella enterica subsp. enterica serovar Newport str. CVM N1543	4827959	3082	3	3	0	0	0	3	0	0	0	0	3	0	0	0
NZ_AHJO01000001.1	1132501	Sulfolobus islandicus M.16.23	2601131	1659	0	0	0	0	0	0	0	0	0	1	0	0	0	0
NC_017941.2	523841	Haloferax mediterranei ATCC 33500	3904707	2558	1	1	0	0	0	1	0	0	0	1	1	0	0	0
NC_022659.1	1241583	Burkholderia pseudomallei NCTC 13179	7337157	4771	7	5	0	0	0	1	4	0	0	0	5	0	0	0
NC_004088.1	187410	Yersinia pestis KIM10+	4701745	2935	2	2	0	0	0	0	2	0	0	0	2	0	0	0
NC_015589.1	696281	Desulfotomaculum ruminis DSM 2154	3969014	2550	4	4	0	0	0	4	0	0	0	0	0	0	0	0
NC_015435.1	1006006	Metallosphaera cuprina Ar-4	1840348	1206	0	0	0	0	0	0	0	0	0	1	0	0	0	0
NC_015214.1	891391	Lactobacillus acidophilus 30SC	2097766	1347	0	0	0	0	0	0	0	0	0	0	0	0	0	0
NZ_CP012590.1	712122	Actinomyces sp. oral taxon 414	3836419	2442	2	2	0	0	0	2	0	0	0	1	2	0	0	0
NZ_CP011564.1	1604004	Halanaeroarchaeum sulfurireducens	2253500	1418	2	2	0	0	0	2	0	0	0	1	2	0	0	0
NZ_CP011279.1	93218	Pandoraea apista	5609637	3631	3	3	0	0	0	3	0	0	0	1	3	0	0	0
NZ_CP011922.1	1449091	Francisella noatunensis subsp. orientalis FNO24	1862322	1218	1	1	0	0	0	1	0	0	0	1	1	0	0	0
NZ_CP004377.1	1249477	Burkholderia pseudomallei NAU35A-3	7204083	4612	9	8	0	0	0	2	6	0	0	0	8	0	0	1
NZ_CP003328.1	1147130	Pasteurella multocida subsp. multocida str. HB03	2307684	1508	0	0	0	0	0	0	0	0	0	0	0	0	0	0
NC_008786.1	391735	Verminephrobacter eiseniae EF01-2	5597943	3584	3	3	0	0	0	3	0	0	0	1	3	0	0	0
NC_004307.2	206672	Bifidobacterium longum NCC2705	2260266	1407	3	3	0	0	0	3	0	0	0	1	3	0	0	0
NC_021738.1	1311759	Mannheimia haemolytica D171	2501382	1605	2	2	0	0	0	2	0	0	0	1	2	0	0	0
NZ_CP011538.1	2098	Mycoplasma hominis	695214	452	0	0	0	0	0	0	0	0	0	0	0	0	0	0
NZ_AEUT02000001.1	873447	Streptococcus parauberis NCFD 2020	2164480	1349	2	2	0	0	0	2	0	0	0	0	0	0	0	0
NC_009511.1	392499	Sphingomonas wittichii RW1	5915246	3891	4	4	0	0	0	4	0	0	0	1	4	0	0	0
NC_009776.1	453591	Ignicoccus hospitalis KIN4/I	1297538	827	1	1	0	0	0	1	0	0	0	1	1	0	0	0
NZ_CP012349.1	938141	Salmonella enterica subsp. enterica serovar Sloterdijk str. ATCC 15791	4817791	2987	2	2	0	0	0	2	0	0	0	0	2	0	0	0
NZ_CP009499.1	1299331	Mycobacterium intracellulare 1956	5183048	3364	5	5	0	0	0	2	2	0	1	0	0	0	0	0
NC_019751.1	1170562	Calothrix sp. PCC 6303	6960392	4420	4	4	0	0	0	4	0	0	0	1	4	0	0	0
NC_018417.1	1202539	Candidatus Carsonella ruddii HT isolate Thao2000	157543	107	0	0	0	0	0	0	0	0	0	1	0	0	0	0
NC_021593.1	1281781	Bifidobacterium animalis subsp. lactis Bl12	1938606	1290	1	1	0	0	0	1	0	0	0	1	1	0	0	0
NZ_CP006819.1	1408178	Streptococcus thermophilus ASCC 1275	1845495	1224	1	1	0	0	0	1	0	0	0	0	0	0	0	0
NZ_CP009016.1	611301	Xanthomonas citri subsp. citri	5223748	3377	1	1	0	0	0	0	1	0	0	0	1	0	0	0
NZ_CP010441.1	83333	Escherichia coli K-12	4607634	2954	5	3	1	0	0	3	1	0	0	1	3	1	0	0
NC_017505.1	630588	Neisseria meningitidis alpha710	2242947	1447	0	0	0	0	0	0	0	0	0	0	0	0	0	0
NZ_HG965802.1	38323	Bartonella henselae	1905383	1229	4	4	0	0	0	4	0	0	0	0	3	0	0	0
NC_016909.1	1105105	Rickettsia rickettsii str. Arizona	1267197	834	0	0	0	0	0	0	0	0	0	0	0	0	0	0
NC_018412.1	1159203	Mycoplasma gallisepticum CA06_2006.052-5-2P	976412	615	0	0	0	0	0	0	0	0	0	1	0	0	0	0
NZ_CP002871.1	1010834	Mycobacterium tuberculosis HKBS1	4407929	2724	3	3	0	0	0	0	3	0	0	1	3	0	0	0
NC_008595.1	243243	Mycobacterium avium 104	5475491	3474	2	2	0	0	0	2	0	0	0	1	2	0	0	0
NZ_CP010442.1	83333	Escherichia coli K-12	4660432	2964	2	2	0	0	0	2	0	0	0	0	2	0	0	0
NZ_CP008953.1	208439	Amycolatopsis japonica	9053857	5827	7	7	0	0	0	7	0	0	0	1	7	0	0	0
NZ_CP010818.1	65058	Corynebacterium ulcerans	2483321	1592	2	2	0	0	0	2	0	0	0	0	0	0	0	0
NC_014298.1	795797	Halalkalicoccus jeotgali B3	3698650	2336	4	4	0	0	0	4	0	0	0	1	4	0	0	0
NC_021889.1	907267	Chlamydia trachomatis RC-J/953	1038792	643	1	1	0	0	0	1	0	0	0	0	1	0	0	0
NC_018866.1	1147129	Dehalobacter sp. DCA	3069953	1886	1	1	0	0	0	0	1	0	0	1	1	0	0	0
NC_017111.1	634457	Acetobacter pasteurianus IFO 3283-32	3337040	2093	1	1	0	0	0	1	0	0	0	1	1	0	0	0
NZ_CP009429.1	33050	Sphingopyxis macrogoltabida	5748623	3715	5	5	0	0	0	5	0	0	0	0	1	0	0	0
NC_020064.1	1249634	Serratia marcescens FGI94	4858216	3134	4	4	0	0	0	4	0	0	0	0	0	0	0	0
NC_017281.1	718271	Campylobacter jejuni subsp. jejuni S3	1724586	1065	4	4	0	0	0	4	0	0	0	1	4	0	0	0
NC_010278.1	434271	Actinobacillus pleuropneumoniae serovar 3 str. JL03	2242062	1450	2	2	0	0	0	1	1	0	0	0	2	0	0	0
NC_011992.1	535289	Acidovorax ebreus TPSY	3796573	2471	2	2	0	0	0	2	0	0	0	0	1	0	1	0
NC_017063.1	1055527	Helicobacter pylori ELS37	1669876	1027	3	3	0	0	0	3	0	0	0	0	2	0	0	0
NZ_CP011522.1	1649184	Streptomyces sp. CFMR 7	8307279	5374	11	11	0	0	0	11	0	0	0	1	11	0	0	0
NZ_CP010519.1	1888	Streptomyces albus	8384669	5323	8	8	0	0	0	8	0	0	0	1	8	0	0	0
NZ_CP012482.1	1408	Bacillus pumilus	3787818	2444	5	3	0	0	0	3	0	0	0	0	0	0	0	0
NC_009656.1	381754	Pseudomonas aeruginosa PA7	6588339	4264	3	3	0	0	0	3	0	0	0	1	3	0	0	0
NZ_CP009117.1	1398491	Borrelia valaisiana Tom4006	992695	592	0	0	0	0	0	0	0	0	0	1	0	0	0	0
NZ_CP007520.1	743967	Mycoplasma yeatsii GM274B	895051	525	0	0	0	0	0	0	0	0	0	0	0	0	0	0
NC_020210.1	1233873	Geobacillus sp. GHH01	3583134	2254	0	0	0	0	0	0	0	0	0	1	0	0	0	0
NC_012925.1	218494	Streptococcus suis P1/7	2007491	1270	2	2	0	0	0	2	0	0	0	1	2	0	0	0
NZ_CP011018.1	562	Escherichia coli	5092643	3243	3	1	1	0	0	1	1	0	0	0	2	1	0	0
NC_016809.1	862964	Haemophilus influenzae 10810	1981535	1269	0	0	0	0	0	0	0	0	0	0	0	0	0	0
NZ_CP009759.1	633	Yersinia pseudotuberculosis	4774559	2998	6	6	0	0	0	1	5	0	0	0	6	0	0	0
NZ_CP009426.1	1773	Mycobacterium tuberculosis	4379376	2747	3	3	0	0	0	0	3	0	0	0	3	0	0	0
NZ_CP012090.1	659019	Mycobacterium tuberculosis W-148	4418548	2775	4	4	0	0	0	0	4	0	0	0	4	0	0	0
NC_015573.1	760568	Desulfotomaculum kuznetsovii DSM 6115	3601386	2301	2	2	0	0	0	2	0	0	0	0	0	0	0	0
NC_015726.1	1042878	Cupriavidus necator N-1	8480857	5408	7	5	1	0	0	5	1	0	0	0	4	0	0	0
NZ_CP007147.1	1448140	Pseudomonas aeruginosa YL84	6433441	4186	2	2	0	0	0	2	0	0	0	1	2	0	0	0
NZ_CP008714.1	487909	Xanthomonas translucens pv. undulosa	4561137	2917	2	2	0	0	0	2	0	0	0	1	2	0	0	0
NC_015931.1	694429	Pyrolobus fumarii 1A	1843267	1138	0	0	0	0	0	0	0	0	0	1	0	0	0	0
NC_003997.3	198094	Bacillus anthracis str. Ames	5227293	3260	4	4	0	0	0	2	2	0	0	0	4	0	0	0
NZ_CP007522.1	1316911	Bifidobacterium animalis subsp. lactis KLDS2.0603	1946899	1131	2	2	0	0	0	2	0	0	0	0	2	0	0	0
NC_014961.1	765177	Desulfurococcus mucosus DSM 2162	1314639	839	2	1	0	0	0	1	0	0	0	1	1	0	0	0
NZ_CP011389.1	1309411	'Deinococcus soli' Cha et al. 2014	3236984	2023	0	0	0	0	0	0	0	0	0	0	0	0	0	0
NC_017307.1	935697	Corynebacterium pseudotuberculosis CIP 52.97	2320595	1535	1	1	0	0	0	1	0	0	0	1	1	0	0	0
NC_008610.1	413404	Candidatus Ruthia magnifica str. Cm (Calyptogena magnifica)	1160782	761	0	0	0	0	0	0	0	0	0	1	0	0	0	0
NC_015946.1	743965	Mycoplasma putrefaciens KS1	832603	498	3	3	0	0	0	3	0	0	0	0	0	0	0	0
NZ_HG917972.2	1131442	Mycobacterium marinum E11	6450522	4130	7	7	0	0	0	5	2	0	0	0	0	0	2	0
NC_017503.1	708616	Mycoplasma gallisepticum str. F	977612	617	2	2	0	0	0	2	0	0	0	0	2	0	0	0
NC_013512.1	525898	Sulfurospirillum deleyianum DSM 6946	2306351	1450	2	2	0	0	0	2	0	0	0	1	2	0	0	0
NC_013959.1	580332	Sideroxydans lithotrophicus ES-1	3003656	1961	3	3	0	0	0	3	0	0	0	1	3	0	0	0
NZ_CP011647.1	573	Klebsiella pneumoniae	5620516	3678	2	2	0	0	0	2	0	0	0	0	2	0	0	0
NZ_AP014522.1	1420599	Pseudomonas protegens Cab57	6827892	4408	2	2	0	0	0	2	0	0	0	0	2	0	0	0
NZ_LN847257.1	83558	Chlamydia pneumoniae	1228576	757	2	2	0	0	0	2	0	0	0	0	2	0	0	0
NC_020209.1	1282356	Pseudomonas poae RE*1-1-14	5512241	3592	3	3	0	0	0	3	0	0	0	0	0	0	0	0
NC_012207.1	561275	Mycobacterium bovis BCG str. Tokyo 172	4371711	2763	2	2	0	0	0	0	2	0	0	0	2	0	0	0
NC_015677.1	365046	Ramlibacter tataouinensis TTB310	4070193	2525	5	5	0	0	0	5	0	0	0	1	5	0	0	0
NC_014472.1	313603	Maribacter sp. HTCC2170	3868304	2548	1	1	0	0	0	1	0	0	0	1	1	0	0	0
NZ_CP004858.1	570416	Bacillus thuringiensis serovar kurstaki str. YBT-1520	6580536	4266	3	3	0	0	0	0	3	0	0	1	3	0	0	0
NZ_CP009509.1	1434117	Methanosarcina mazei WWM610	4096482	2604	1	1	0	0	0	1	0	0	0	1	1	0	0	0
NC_019776.1	755178	Cyanobacterium aponinum PCC 10605	4176973	2623	2	1	0	0	0	1	0	0	0	1	1	0	0	0
NZ_CP007176.1	1458279	Staphylococcus aureus USA300-ISMMS1	2951201	1839	1	1	0	0	0	1	0	0	0	0	1	0	0	0
NZ_CP004393.1	1208324	Celeribacter indicus	4969388	3089	3	3	0	0	0	3	0	0	0	1	3	0	0	0
NZ_CP010299.1	1280	Staphylococcus aureus	2872781	1880	2	2	0	0	0	2	0	0	0	0	2	0	0	0
NC_015391.1	208596	Carnobacterium sp. 17-4	2685399	1667	1	1	0	0	0	1	0	0	0	1	1	0	0	0
NC_011769.1	883	Desulfovibrio vulgaris str. 'Miyazaki F'	4040304	2622	1	1	0	0	0	1	0	0	0	0	0	0	0	0
NZ_CP007727.1	1094170	Klebsiella pneumoniae subsp. pneumoniae KPNIH10	5767822	3605	7	7	0	0	0	6	1	0	0	1	7	0	0	0
NC_020299.1	1208920	Candidatus Kinetoplastibacterium oncopeltii TCC290E	810172	549	0	0	0	0	0	0	0	0	0	1	0	0	0	0
NC_012778.1	515620	[Eubacterium] eligens ATCC 27750	2831389	1814	2	2	0	0	0	2	0	0	0	1	2	0	0	0
NC_022582.1	1156433	Streptococcus sp. I-P16	2023580	1277	0	0	0	0	0	0	0	0	0	1	0	0	0	0
NC_006513.1	76114	Aromatoleum aromaticum EbN1	4727255	3055	5	5	0	0	0	5	0	0	0	1	5	0	0	0
NC_018178.1	1191523	Melioribacter roseus P3M-2	3300414	2082	2	2	0	0	0	2	0	0	0	1	2	0	0	0
NZ_CP007744.1	29471	Pectobacterium atrosepticum	5004926	3210	1	1	0	0	0	1	0	0	0	1	1	0	0	0
NC_022107.1	1340853	Chlamydia trachomatis F/11-96	1042853	701	0	0	0	0	0	0	0	0	0	0	0	0	0	0
NC_021807.1	1336746	Streptococcus pyogenes HSC5	1818351	1137	1	1	0	0	0	1	0	0	0	1	1	0	0	0
NZ_CP011280.1	187101	Sneathia amnii	1330224	839	0	0	0	0	0	0	0	0	0	1	0	0	0	0
NC_010546.1	43989	Cyanothece sp. ATCC 51142	5460377	3501	2	2	0	0	0	2	0	0	0	0	0	0	0	0
NZ_CP011060.1	1329908	Borrelia hermsii CC1	922280	584	0	0	0	0	0	0	0	0	0	0	0	0	0	0
NC_002689.2	273116	Thermoplasma volcanium GSS1	1584804	1067	1	1	0	0	0	1	0	0	0	1	1	0	0	0
NC_007481.1	326442	Pseudoalteromonas haloplanktis TAC125	3850272	2464	4	4	0	0	0	4	0	0	0	1	4	0	0	0
NZ_CP009341.1	1392	Bacillus anthracis	5498337	3436	6	6	0	0	0	1	5	0	0	0	6	0	0	0
NC_013199.1	568704	Lactobacillus rhamnosus Lc 705	3033106	1947	3	3	0	0	0	3	0	0	0	0	0	0	0	0
NC_009783.1	338187	Vibrio campbellii ATCC BAA-1116	6058377	3909	3	2	0	0	0	1	1	0	0	0	1	0	0	0
NC_008260.1	393595	Alcanivorax borkumensis SK2	3120143	2108	0	0	0	0	0	0	0	0	0	1	0	0	0	0
NZ_CP010436.1	210	Helicobacter pylori	1667303	1020	1	1	0	0	0	1	0	0	0	1	1	0	0	0
NC_017502.1	710128	Mycoplasma gallisepticum str. R(high)	1012027	609	1	0	0	0	0	0	0	0	0	1	0	0	0	0
NZ_CP010586.1	1452722	Bacillus megaterium Q3	5229799	3309	5	5	0	0	0	5	0	0	0	0	0	0	0	0
NC_011989.1	311402	Agrobacterium vitis S4	6320946	4107	6	6	0	0	0	6	0	0	0	0	0	0	0	0
NC_014638.1	702459	Bifidobacterium bifidum PRL2010	2214656	1422	3	3	0	0	0	3	0	0	0	0	0	0	0	0
NZ_CP009601.1	1249660	Burkholderia thailandensis 2002721643	6722801	4375	2	1	0	0	0	1	0	0	0	0	0	0	0	0
NC_013192.1	523794	Leptotrichia buccalis C-1013-b	2465610	1592	0	0	0	0	0	0	0	0	0	1	0	0	0	0
NC_014924.1	743721	Pseudoxanthomonas suwonensis 11-1	3419049	2216	3	3	0	0	0	3	0	0	0	1	3	0	0	0
NC_015633.1	882102	Vibrio anguillarum 775	4052047	2503	3	3	0	0	0	3	0	0	0	0	3	0	0	0
NZ_CP010089.1	29338	Bacillus thuringiensis serovar galleriae	6742233	4280	6	5	0	0	0	0	5	0	0	0	5	0	0	0
NZ_CP010912.1	589873	Alteromonas australica	4457472	2841	5	5	0	0	0	5	0	0	0	0	0	0	0	0
NZ_CP011535.1	1314	Streptococcus pyogenes	1896976	1179	0	0	0	0	0	0	0	0	0	1	0	0	0	0
NC_009009.1	388919	Streptococcus sanguinis SK36	2388435	1527	2	2	0	0	0	2	0	0	0	1	2	0	0	0
NZ_CP011259.1	1124917	Salmonella enterica subsp. enterica serovar Agona str. 460004 2-1	4797171	3081	2	2	0	0	0	2	0	0	0	0	2	0	0	0
NZ_CP009692.1	1405	Bacillus mycoides	5637053	3555	7	7	0	0	0	2	5	0	0	0	2	0	0	0
NZ_CP009273.1	679895	Escherichia coli BW25113	4631469	2936	6	2	3	0	0	2	3	0	0	0	2	3	0	0
NC_022081.1	1150476	Bacillus methylotrophicus UCMB5113	3889532	2485	1	1	0	0	0	0	1	0	0	0	1	0	0	0
NC_006677.1	290633	Gluconobacter oxydans 621H	2922384	1860	2	2	0	0	0	2	0	0	0	0	2	0	0	0
NC_016616.1	640081	Dechlorosoma suillum PS	3806980	2459	2	2	0	0	0	2	0	0	0	1	2	0	0	0
NC_014328.1	748727	Clostridium ljungdahlii DSM 13528	4630065	2948	5	4	0	0	0	2	2	0	0	0	2	0	0	0
NC_022898.1	1415167	Bacillus subtilis PY79	4033459	2578	3	2	0	0	0	0	2	0	0	0	1	0	0	0
NC_010513.1	405440	Xylella fastidiosa M12	2475130	1642	4	4	0	0	0	4	0	0	0	1	4	0	0	0
NZ_CP006772.1	1400053	Bacteroidales bacterium CF	2657245	0	0	0	0	0	0	0	0	0	0	0	0	0	0	0
NC_016802.1	698968	Corynebacterium diphtheriae HC02	2468612	1597	1	1	0	0	0	1	0	0	0	1	1	0	0	0
NZ_CP011129.1	84531	Lysobacter antibioticus	5916388	3708	5	5	0	0	0	5	0	0	0	1	5	0	0	0
NC_016787.1	698969	Corynebacterium diphtheriae HC03	2478364	1572	3	3	0	0	0	3	0	0	0	1	3	0	0	0
NZ_CP007183.1	1183378	Campylobacter coli RM1875	1858716	1153	2	2	0	0	0	2	0	0	0	0	0	0	0	0
NC_004552.2	218497	Chlamydophila abortus S26/3	1144377	693	0	0	0	0	0	0	0	0	0	1	0	0	0	0
NZ_CP007541.1	325775	Coxiella endosymbiont of Amblyomma americanum	656901	426	1	1	0	0	0	1	0	0	0	1	1	0	0	0
NC_016111.1	1003195	Streptomyces cattleya NRRL 8057 = DSM 46488	8092553	5227	3	3	0	0	0	3	0	0	0	1	3	0	0	0
NC_021872.1	1358027	Lactobacillus reuteri TD1	2145445	1367	2	2	0	0	0	2	0	0	0	0	0	0	0	0
NZ_CP009290.1	86192	Pseudomonas chlororaphis subsp. aurantiaca	6702062	4310	6	5	0	0	0	5	0	0	0	1	4	0	0	0
NC_017192.1	944547	Arcobacter sp. L	2947662	1946	3	3	0	0	0	3	0	0	0	1	3	0	0	0
NC_022583.1	1406864	Mesoplasma florum W37	825824	545	1	1	0	0	0	1	0	0	0	1	1	0	0	0
NZ_CP007760.1	520466	Brucella melitensis bv. 3 str. Ether	3310727	2102	0	0	0	0	0	0	0	0	0	1	0	0	0	0
NC_010161.1	382640	Bartonella tribocorum CIP 105476	2642404	1700	1	1	0	0	0	1	0	0	0	0	0	0	0	0
NC_010336.1	484022	Francisella philomiragia subsp. philomiragia ATCC 25017	2049711	1329	1	1	0	0	0	1	0	0	0	1	1	0	0	0
NC_020164.1	1194526	Staphylococcus warneri SG1	2560716	1589	2	2	0	0	0	2	0	0	0	0	0	0	0	0
NZ_CP012381.1	1587	Lactobacillus helveticus	2160583	1428	2	2	0	0	0	2	0	0	0	0	2	0	0	0
NC_002745.2	158879	Staphylococcus aureus subsp. aureus N315	2839469	1764	1	1	0	0	0	1	0	0	0	0	1	0	0	0
NC_023066.1	1408272	Pseudomonas aeruginosa LES431	6550070	4101	3	3	0	0	0	3	0	0	0	1	3	0	0	0
NZ_CP012358.1	1697053	Pseudomonadaceae bacterium B4199	2494031	0	0	0	0	0	0	0	0	0	0	0	0	0	0	0
NZ_CP007393.1	562	Escherichia coli	4998910	3156	5	4	1	0	0	4	1	0	0	1	4	1	0	0
NC_014831.1	644966	Thermaerobacter marianensis DSM 12885	2844696	1876	2	1	0	0	0	1	0	0	0	1	1	0	0	0
NC_017790.1	745776	Deinococcus gobiensis I-0	4406036	2812	2	2	0	0	0	2	0	0	0	0	0	0	0	0
NC_012891.1	486410	Streptococcus dysgalactiae subsp. equisimilis GGS_124	2106340	1305	0	0	0	0	0	0	0	0	0	0	0	0	0	0
NC_015709.1	579138	Zymomonas mobilis subsp. pomaceae ATCC 29192	2061413	1323	0	0	0	0	0	0	0	0	0	0	0	0	0	0
NZ_CP008881.1	96345	Flavobacterium psychrophilum	2684585	1716	1	1	0	0	0	1	0	0	0	1	1	0	0	0
NZ_CP009511.1	1434115	Methanosarcina mazei SarPi	4066551	2542	2	2	0	0	0	2	0	0	0	0	1	0	0	0
NC_015590.1	693982	Sinorhizobium meliloti AK83	7140471	4524	5	5	0	0	0	5	0	0	0	1	5	0	0	0
NZ_CP006027.1	1248902	Escherichia coli O145:H28 str. RM13514	5737294	3664	7	3	4	0	0	3	4	0	0	0	2	4	0	0
NC_016048.1	693746	Oscillibacter valericigenes Sjm18-20	4470622	2872	4	4	0	0	0	4	0	0	0	1	4	0	0	0
NZ_CP006271.1	585425	Synechococcus sp. KORDI-52	2572069	1638	0	0	0	0	0	0	0	0	0	0	0	0	0	0
NZ_CP004383.1	1249667	Burkholderia thailandensis USAMRU Malaysia #20	6684359	4235	5	5	0	0	0	3	1	0	1	0	5	0	0	0
NC_022126.1	585143	Staphylococcus aureus subsp. aureus 55/2053	2777368	1812	0	0	0	0	0	0	0	0	0	0	0	0	0	0
NC_013654.1	431946	Escherichia coli SE15	4839683	3013	6	5	1	0	0	5	1	0	0	0	5	1	0	0
NZ_CP013050.1	55802	Thermococcus barophilus	2388527	1488	1	1	0	0	0	1	0	0	0	0	0	0	0	0
NC_019753.1	1173022	Crinalium epipsammum PCC 9333	5620407	3574	6	6	0	0	0	6	0	0	0	1	6	0	0	0
NZ_CP012024.1	1479	Bacillus smithii	3381292	2189	2	2	0	0	0	2	0	0	0	0	0	0	0	0
NC_006155.1	273123	Yersinia pseudotuberculosis IP 32953	4840898	3138	2	2	0	0	0	0	2	0	0	1	2	0	0	0
NZ_CP011528.1	1280	Staphylococcus aureus	2743559	1807	1	1	0	0	0	1	0	0	0	0	1	0	0	0
NZ_CP009641.1	451709	Bacillus cereus 03BB108	6068729	3837	2	2	0	0	0	0	2	0	0	1	2	0	0	0
NC_013921.1	580331	Thermoanaerobacter italicus Ab9	2451061	1571	1	1	0	0	0	1	0	0	0	1	1	0	0	0
NC_013124.1	525909	Acidimicrobium ferrooxidans DSM 10331	2158157	1394	0	0	0	0	0	0	0	0	0	1	0	0	0	0
NZ_CP009709.1	1121088	Bacillus coagulans DSM 1 = ATCC 7050	3366995	2163	3	3	0	0	0	3	0	0	0	1	3	0	0	0
NC_018692.1	1004785	Alteromonas macleodii str. 'Black Sea 11'	4480507	2827	3	3	0	0	0	3	0	0	0	1	3	0	0	0
NC_011365.1	272568	Gluconacetobacter diazotrophicus PA1 5	3914947	2548	4	3	0	1	0	3	0	1	0	1	3	0	1	0
NZ_CP007133.1	1248903	Escherichia coli O145:H28 str. RM12761	5559014	3690	3	2	1	0	0	2	1	0	0	0	0	1	1	0
NC_018010.1	866536	Belliella baltica DSM 15883	4196595	2746	1	1	0	0	0	1	0	0	0	1	1	0	0	0
NZ_CP013287.1	1639	Listeria monocytogenes	2842039	1778	0	0	0	0	0	0	0	0	0	0	0	0	0	0
NZ_CP009217.1	1528098	Rickettsiales bacterium Ac37b	1917564	0	0	0	0	0	0	0	0	0	0	0	0	0	0	0
NC_002678.2	266835	Mesorhizobium loti MAFF303099	7596297	4828	4	4	0	0	0	4	0	0	0	1	4	0	0	0
NC_002163.1	192222	Campylobacter jejuni subsp. jejuni NCTC 11168 = ATCC 700819	1641481	1026	0	0	0	0	0	0	0	0	0	1	0	0	0	0
NC_015460.1	1005058	Gallibacterium anatis UMN179	2694139	1762	2	1	0	0	0	1	0	0	0	1	1	0	0	0
NZ_CP009927.1	1719	Corynebacterium pseudotuberculosis	2337177	1518	1	1	0	0	0	1	0	0	0	1	1	0	0	0
NZ_LN849008.1	520	Bordetella pertussis	4106389	2655	5	5	0	0	0	3	1	1	0	1	5	0	0	0
NC_008344.1	335283	Nitrosomonas eutropha C91	2781824	1743	1	1	0	0	0	1	0	0	0	1	1	0	0	0
NC_022780.1	1408206	Pediococcus pentosaceus SL4	1789138	1106	2	2	0	0	0	2	0	0	0	1	2	0	0	0
NC_010172.1	419610	Methylobacterium extorquens PA1	5471154	3609	0	0	0	0	0	0	0	0	0	0	0	0	0	0
NC_018001.1	768672	Desulfurococcus fermentans DSM 16532	1384116	897	1	1	0	0	0	1	0	0	0	0	0	0	0	0
NC_007951.1	266265	Burkholderia xenovorans LB400	9731138	6268	6	6	0	0	0	6	0	0	0	0	2	0	0	0
NC_005773.3	264730	Pseudomonas savastanoi pv. phaseolicola 1448A	6112448	3924	1	1	0	0	0	1	0	0	0	0	0	0	0	0
NC_017191.1	1034836	Bacillus amyloliquefaciens XH7	3939203	2478	2	2	0	0	0	1	1	0	0	0	1	0	0	0
NC_013450.1	681288	Staphylococcus aureus subsp. aureus ED98	2847542	1849	3	3	0	0	0	3	0	0	0	0	3	0	0	0
NC_010831.1	331678	Chlorobium phaeobacteroides BS1	2736403	1772	1	1	0	0	0	1	0	0	0	0	0	0	0	0
NZ_CP011409.1	1262470	Herbaspirillum hiltneri N3	4965474	3237	4	4	0	0	0	4	0	0	0	1	4	0	0	0
NC_022247.1	1246301	Variovorax paradoxus B4	7148516	4480	3	3	0	0	0	3	0	0	0	0	0	0	1	0
NC_022538.1	1318466	Acholeplasma palmae J233	1554229	975	2	2	0	0	0	2	0	0	0	1	2	0	0	0
NC_018630.1	697283	Streptococcus pneumoniae gamPNI0373	2064154	1344	1	1	0	0	0	1	0	0	0	0	1	0	0	0
NC_012804.1	593117	Thermococcus gammatolerans EJ3	2045438	1329	3	3	0	0	0	3	0	0	0	1	3	0	0	0
NC_022082.1	1380908	Klebsiella pneumoniae JM45	5603174	3617	5	4	1	0	0	4	1	0	0	0	5	0	0	0
NZ_CP007392.1	562	Escherichia coli	5054509	3267	6	2	4	0	0	2	4	0	0	1	2	4	0	0
NC_003910.7	167879	Colwellia psychrerythraea 34H	5373180	3446	4	4	0	0	0	4	0	0	0	1	4	0	0	0
NZ_CP012176.1	43687	Metallosphaera sedula	2191533	1364	1	1	0	0	0	1	0	0	0	1	1	0	0	0
NZ_CP012109.1	1297742	Myxococcus sp. (contaminant ex DSM 436)	9490432	6125	6	6	0	0	0	6	0	0	0	1	6	0	0	0
NZ_CP003949.1	543736	Rhodococcus opacus PD630	9169032	5759	8	8	0	0	0	5	3	0	0	1	8	0	0	0
NC_014210.1	446468	Nocardiopsis dassonvillei subsp. dassonvillei DSM 43111	6543312	4113	5	5	0	0	0	5	0	0	0	1	5	0	0	0
NC_017910.1	630626	Shimwellia blattae DSM 4481 = NBRC 105725	4158725	2596	1	1	0	0	0	1	0	0	0	1	1	0	0	0
NZ_CP012805.1	1328	Streptococcus anginosus	1924513	1236	0	0	0	0	0	0	0	0	0	0	0	0	0	0
NC_017920.1	416344	Burkholderia sp. KJ006	6629912	4282	6	6	0	0	0	1	4	1	0	0	5	0	0	0
NC_021810.1	1124936	Salmonella enterica subsp. enterica serovar Heidelberg str. 41578	4951478	3117	3	3	0	0	0	3	0	0	0	0	3	0	0	0
NZ_CP013130.1	60520	Lactobacillus paraplantarum	3139729	2010	5	5	0	0	0	5	0	0	0	0	0	0	1	0
NZ_CP007657.1	1280	Staphylococcus aureus	2874372	1831	0	0	0	0	0	0	0	0	0	0	0	0	0	0
NZ_CP009500.1	65058	Corynebacterium ulcerans	2484335	1479	0	0	0	0	0	0	0	0	0	0	0	0	0	0
NC_013361.1	573235	Escherichia coli O26:H11 str. 11368	5855531	3744	5	2	3	0	0	2	3	0	0	0	1	3	1	0
NZ_CP007247.1	1412455	Salmonella enterica subsp. enterica serovar Enteritidis str. EC20110221	4709033	2998	0	0	0	0	0	0	0	0	0	1	0	0	0	0
NC_009699.1	441772	Clostridium botulinum F str. Langeland	4012918	2533	2	2	0	0	0	2	0	0	0	1	2	0	0	0
NZ_CP011989.1	1284802	Klebsiella pneumoniae UHKPC33	5663117	3623	1	1	0	0	0	1	0	0	0	1	1	0	0	0
NZ_CP009781.1	1453495	Yersinia aldovae 670-83	4471090	2790	1	0	0	1	0	0	0	1	0	0	0	0	1	0
NC_014216.1	589865	Desulfurivibrio alkaliphilus AHT 2	3097763	2012	0	0	0	0	0	0	0	0	0	1	0	0	0	0
NC_010830.1	452471	Candidatus Amoebophilus asiaticus 5a2	1884364	1194	0	0	0	0	0	0	0	0	0	1	0	0	0	0
NC_016051.1	246969	Thermococcus sp. AM4	2086428	1381	1	1	0	0	0	1	0	0	0	0	1	0	0	0
NZ_CP007668.1	935590	Neisseria meningitidis M0579	2324822	1431	4	4	0	0	0	3	1	0	0	0	3	0	0	0
NC_002488.3	160492	Xylella fastidiosa 9a5c	2731750	1771	1	1	0	0	0	1	0	0	0	1	1	0	0	0
NZ_CP010406.1	1446792	Bacillus sp. Pc3	3982168	2584	1	1	0	0	0	0	1	0	0	0	1	0	0	0
NC_018587.1	932919	Listeria monocytogenes SLCC2755	3023926	1827	4	3	0	0	0	3	0	0	0	1	3	0	0	0
NC_014844.1	643562	Desulfovibrio aespoeensis Aspo-2	3629109	2303	7	7	0	0	0	7	0	0	0	0	0	0	1	0
NZ_CP003679.1	1095955	Treponema pallidum subsp. pallidum str. Sea 81-4	1139203	716	0	0	0	0	0	0	0	0	0	0	0	0	0	0
NZ_CP010540.1	1263761	Mycoplasma pneumoniae 39443	817184	496	1	1	0	0	0	1	0	0	0	0	1	0	0	0
NC_020911.1	391626	Octadecabacter antarcticus 307	4875481	3125	6	6	0	0	0	6	0	0	0	1	6	0	0	0
NC_016797.1	1112912	Brucella suis VBI22	3316088	2055	3	3	0	0	0	0	1	0	0	0	3	0	0	0
NC_014618.1	701347	Enterobacter lignolyticus SCF1	4814049	3122	3	3	0	0	0	3	0	0	0	0	0	0	0	0
NC_018681.1	1133849	Nocardia brasiliensis ATCC 700358	9436348	6015	4	4	0	0	0	4	0	0	0	1	4	0	0	0
NZ_CP012649.1	1661	Trueperella pyogenes	2295822	1494	3	3	0	0	0	3	0	0	0	1	3	0	0	0
NC_022998.1	1276258	Spiroplasma apis B31	1160554	754	0	0	0	0	0	0	0	0	0	0	0	0	0	0
NC_015576.1	875328	Mycobacterium sinense	4643668	2983	4	4	0	0	0	4	0	0	0	0	0	0	0	0
NZ_CP006934.1	1276257	Spiroplasma sabaudiense Ar-1343	1075953	674	0	0	0	0	0	0	0	0	0	0	0	0	0	0
NC_013525.1	525904	Thermobaculum terrenum ATCC BAA-798	3101581	2021	1	1	0	0	0	1	0	0	0	1	1	0	0	0
NC_007797.1	212042	Anaplasma phagocytophilum str. HZ	1471282	970	0	0	0	0	0	0	0	0	0	0	0	0	0	0
NC_016930.1	481009	Rickettsia philipii str. 364D	1287740	758	0	0	0	0	0	0	0	0	0	0	0	0	0	0
NZ_CP009084.2	149539	Salmonella enterica subsp. enterica serovar Enteritidis	4679126	3024	2	2	0	0	0	2	0	0	0	1	2	0	0	0
NC_012582.1	345073	Vibrio cholerae O395	4135300	2563	1	1	0	0	0	1	0	0	0	0	1	0	0	0
NZ_CP008747.1	1284	Staphylococcus hyicus	2472129	1511	1	1	0	0	0	1	0	0	0	0	0	0	0	0
NC_020568.1	1074919	Staphylococcus aureus subsp. aureus ST228	2783086	1747	0	0	0	0	0	0	0	0	0	0	0	0	0	0
NZ_LN831039.1	1772	Mycobacterium smegmatis	6983267	4425	2	2	0	0	0	2	0	0	0	1	2	0	0	0
NZ_CP007805.1	1295140	Haemophilus influenzae CGSHiCZ412602	1811802	1131	1	0	0	0	0	0	0	0	0	1	1	0	0	0
NC_010939.1	537457	Actinobacillus pleuropneumoniae serovar 7 str. AP76	2345435	1469	1	0	0	1	0	0	0	1	0	0	0	0	1	0
NZ_CP011526.1	1241616	Staphylococcus aureus subsp. aureus DSM 20231	2782562	1718	2	2	0	0	0	2	0	0	0	0	2	0	0	0
NC_021714.1	1300259	Alteromonas macleodii str. 'Ionian Sea UM4b'	4438767	2749	2	2	0	0	0	1	1	0	0	1	2	0	0	0
NZ_CP012266.1	1159554	Cronobacter dublinensis subsp. dublinensis LMG 23823	4628405	3025	6	6	0	0	0	5	1	0	0	1	6	0	0	0
NC_017030.1	1144275	Corallococcus coralloides DSM 2259	10080619	6538	8	7	0	0	0	7	0	0	0	1	8	0	0	0
NC_022353.2	1383068	Campylobacter jejuni subsp. jejuni 00-2544	1766434	1122	4	4	0	0	0	4	0	0	0	0	4	0	0	0
NZ_CP007243.1	1441628	Leptospirillum ferriphilum YSK	2330585	1526	2	2	0	0	0	1	1	0	0	1	2	0	0	0
NZ_CP009459.1	158822	Cedecea neteri	4659311	3005	4	4	0	0	0	4	0	0	0	0	3	0	0	1
NC_014483.2	349520	Paenibacillus polymyxa E681	5394883	3413	6	6	0	0	0	5	1	0	0	1	6	0	0	0
NC_009636.1	366394	Sinorhizobium medicae WSM419	6817576	4342	3	3	0	0	0	3	0	0	0	1	3	0	0	0
NZ_CP005960.1	1147786	Pseudomonas mandelii JR-1	7188564	4592	4	4	0	0	0	4	0	0	0	0	0	0	0	0
NC_008022.1	370552	Streptococcus pyogenes MGAS10270	1928252	1240	2	2	0	0	0	2	0	0	0	0	2	0	0	0
NZ_HG939456.1	342616	Streptococcus agalactiae COH1	2065074	1300	2	2	0	0	0	1	1	0	0	0	2	0	0	0
NC_022041.1	1367847	Paracoccus aminophilus JCM 7686	4873118	3161	3	3	0	0	0	3	0	0	0	1	3	0	0	0
NZ_CP009278.1	1538644	Sphingobacterium sp. ML3W	5329010	3380	6	6	0	0	0	6	0	0	0	1	6	0	0	0
NC_018024.1	891968	Anaerobaculum mobile DSM 13181	2160700	1473	2	2	0	0	0	2	0	0	0	1	2	0	0	0
NC_009883.1	391896	Rickettsia bellii OSU 85-389	1528980	931	0	0	0	0	0	0	0	0	0	0	0	0	0	0
NC_008212.1	362976	Haloquadratum walsbyi DSM 16790	3179361	1965	0	0	0	0	0	0	0	0	0	1	0	0	0	0
NZ_CP011113.1	562	Escherichia coli	4587291	2885	3	1	2	0	0	1	2	0	0	1	1	2	0	0
NZ_CP013120.1	1160720	Alteromonas stellipolaris LMG 21856	4686200	2940	5	4	0	0	0	4	0	0	0	0	0	0	1	0
NC_019048.1	1231389	Streptococcus agalactiae SA20-06	1820886	1148	0	0	0	0	0	0	0	0	0	0	0	0	0	0
NZ_CP011217.1	1308	Streptococcus thermophilus	1861792	1196	1	1	0	0	0	1	0	0	0	0	1	0	0	0
NZ_CP009228.1	221027	Treponema putidum	2800562	1805	2	2	0	0	0	2	0	0	0	1	2	0	0	0
NC_020529.1	1074919	Staphylococcus aureus subsp. aureus ST228	2790364	1768	4	4	0	0	0	2	2	0	0	0	4	0	0	0
NC_009077.1	164757	Mycobacterium sp. JLS	6048425	3813	3	3	0	0	0	1	2	0	0	0	0	0	0	0
NC_017278.1	1111069	Thermus sp. CCB_US3_UF1	2263488	1432	0	0	0	0	0	0	0	0	0	1	0	0	0	0
NC_009674.1	315749	Bacillus cytotoxicus NVH 391-98	4094159	2732	1	1	0	0	0	1	0	0	0	0	1	0	0	0
NZ_AP012544.1	219334	Lactobacillus casei subsp. casei ATCC 393	2952961	1935	2	2	0	0	0	2	0	0	0	0	1	0	0	0
NC_019962.1	797303	Natrinema pellirubrum DSM 15624	4354100	2849	4	4	0	0	0	4	0	0	0	1	4	0	0	0
NC_017586.1	1003195	Streptomyces cattleya NRRL 8057 = DSM 46488	8095515	5338	4	4	0	0	0	4	0	0	0	0	4	0	0	0
NZ_CP012264.1	1073999	Cronobacter condimenti 1330	4499482	2792	4	4	0	0	0	4	0	0	0	0	1	1	0	0
NC_017524.1	707235	Mycobacterium tuberculosis CTRI-2	4398525	2900	2	2	0	0	0	1	1	0	0	1	2	0	0	0
NC_016831.1	1081093	Salmonella enterica subsp. enterica serovar Gallinarum/pullorum str. RKS5078	4637962	2955	2	2	0	0	0	2	0	0	0	1	2	0	0	0
NC_010677.1	441952	Francisella tularensis subsp. mediasiatica FSC147	1893886	1215	2	1	0	0	0	1	0	0	0	0	2	0	0	0
NC_014330.1	759914	Brachyspira pilosicoli 95/1000	2586443	1698	2	2	0	0	0	2	0	0	0	1	2	0	0	0
NZ_AABW01000001.1	272951	Rickettsia sibirica 246	1250021	792	2	2	0	0	0	0	0	0	0	1	2	0	0	0
NC_013943.1	522772	Denitrovibrio acetiphilus DSM 12809	3222077	2101	2	2	0	0	0	2	0	0	0	1	2	0	0	0
NC_008593.1	386415	Clostridium novyi NT	2547720	1604	1	1	0	0	0	1	0	0	0	0	0	0	0	0
NC_012026.1	320483	Anaplasma marginale str. Florida	1202435	715	0	0	0	0	0	0	0	0	0	0	0	0	0	0
NC_021898.1	907271	Chlamydia trachomatis RC-J/966	1038839	687	0	0	0	0	0	0	0	0	0	0	0	0	0	0
NC_010794.1	481448	Methylacidiphilum infernorum V4	2287145	1457	2	2	0	0	0	2	0	0	0	1	2	0	0	0
NC_022657.1	1246995	Actinoplanes friuliensis DSM 7358	9376071	5944	7	7	0	0	0	7	0	0	0	1	7	0	0	0
NC_016893.1	1142511	Wigglesworthia glossinidia endosymbiont of Glossina morsitans morsitans (Yale colony)	719535	474	1	0	0	0	0	0	0	0	0	1	0	0	0	0
NZ_CP007618.1	1392	Bacillus anthracis	5331737	3405	4	4	0	0	0	1	1	1	1	0	4	0	0	0
NC_016511.1	1114969	Propionibacterium acnes TypeIA2 P.acn31	2498766	1610	2	2	0	0	0	2	0	0	0	0	2	0	0	0
NZ_CP007528.1	886715	Salmonella enterica subsp. enterica serovar Enteritidis str. CDC_2010K_0968	4739031	3087	3	3	0	0	0	3	0	0	0	0	3	0	0	0
NC_005072.1	59919	Prochlorococcus marinus subsp. pastoris str. CCMP1986	1657990	1061	0	0	0	0	0	0	0	0	0	0	0	0	0	0
NZ_LN831024.1	287	Pseudomonas aeruginosa	6316979	4070	6	6	0	0	0	6	0	0	0	0	5	0	0	0
NC_016776.1	862962	Bacteroides fragilis 638R	5373121	3482	6	6	0	0	0	6	0	0	0	1	6	0	0	0
NC_017328.1	591020	Shigella flexneri 2002017	4894492	3100	1	1	0	0	0	1	0	0	0	1	1	0	0	0
NZ_LN847000.1	83558	Chlamydia pneumoniae	1228579	797	1	1	0	0	0	1	0	0	0	0	1	0	0	0
NZ_CP007659.1	46170	Staphylococcus aureus subsp. aureus	2846320	1836	1	1	0	0	0	1	0	0	0	0	1	0	0	0
NZ_CP007606.1	210	Helicobacter pylori	1604212	1039	0	0	0	0	0	0	0	0	0	0	0	0	0	0
NZ_CP006918.1	1420013	Klebsiella pneumoniae 30684/NJST258_2	5417216	3407	1	1	0	0	0	1	0	0	0	1	1	0	0	0
NZ_CP012479.1	1704044	Arthrobacter sp. ERGS1:01	4936686	3235	5	5	0	0	0	5	0	0	0	0	1	0	0	0
NC_015848.1	1048245	Mycobacterium canettii CIPT 140010059	4482059	2834	2	2	0	0	0	0	2	0	0	0	2	0	0	0
NC_004917.1	235279	Helicobacter hepaticus ATCC 51449	1799146	1184	0	0	0	0	0	0	0	0	0	0	0	0	0	0
NZ_CP012697.1	1714373	Microbacterium sp. No. 7	4827965	3180	3	2	0	1	0	2	0	1	0	1	2	0	1	0
NZ_CP007394.1	562	Escherichia coli	5090442	3289	2	2	0	0	0	2	0	0	0	0	2	0	0	0
NZ_CP011005.1	1618207	Arthrobacter sp. IHBB 11108	3599434	2366	2	2	0	0	0	2	0	0	0	1	2	0	0	0
NZ_CP006748.1	1345708	Yersinia pestis 8787	4675987	2938	2	2	0	0	0	0	2	0	0	1	2	0	0	0
NZ_LN879429.1	38323	Bartonella henselae	1905383	1282	3	3	0	0	0	3	0	0	0	1	3	0	0	0
NZ_AFXK01000001.1	1051004	Pseudomonas aeruginosa 213BR	6719211	4251	3	3	0	0	0	3	0	0	0	0	3	0	0	0
NC_014394.1	395494	Gallionella capsiferriformans ES-2	3162471	2036	2	1	0	0	0	1	0	0	0	1	1	0	0	0
NC_020133.1	459424	Mycobacterium liflandii 128FXT	6399543	4086	3	3	0	0	0	1	2	0	0	0	0	0	0	0
NZ_CP004097.1	1241582	Burkholderia thailandensis 2002721723	6577133	4222	5	5	0	0	0	2	2	0	0	0	5	0	0	0
NC_017544.1	393133	Listeria monocytogenes 10403S	2903106	1942	1	1	0	0	0	1	0	0	0	0	1	0	0	0
NZ_CP007562.1	1314	Streptococcus pyogenes	1702054	1119	0	0	0	0	0	0	0	0	0	0	0	0	0	0
NC_017382.1	290847	Helicobacter pylori 51	1589954	996	1	1	0	0	0	1	0	0	0	1	1	0	0	0
NZ_AP014613.1	1113728	Alcanivorax sp. NBRC 101098	3095417	1881	0	0	0	0	0	0	0	0	0	0	0	0	0	0
NC_009698.1	441771	Clostridium botulinum A str. Hall	3760560	2351	0	0	0	0	0	0	0	0	0	0	0	0	0	0
NZ_CP007631.1	1311	Streptococcus agalactiae	2221207	1445	3	2	0	0	0	2	0	0	0	0	2	0	0	0
NZ_CP012004.1	470	Acinetobacter baumannii	4006698	2545	1	1	0	0	0	1	0	0	0	0	1	0	0	0
NC_008599.1	360106	Campylobacter fetus subsp. fetus 82-40	1773615	1116	2	2	0	0	0	2	0	0	0	0	2	0	0	0
NZ_CP003923.1	1246626	Bacillus lehensis G1	3993073	2518	3	3	0	0	0	3	0	0	0	0	0	0	0	0
NC_013595.1	479432	Streptosporangium roseum DSM 43021	10369518	6726	5	5	0	0	0	5	0	0	0	1	5	0	0	0
NZ_CP012173.1	43687	Metallosphaera sedula	2191529	1442	1	1	0	0	0	1	0	0	0	0	1	0	0	0
NC_021991.1	1266844	Acetobacter pasteurianus 386B	3078647	1951	3	3	0	0	0	3	0	0	0	0	1	0	0	0
NZ_CP007726.1	546263	Neisseria elongata subsp. glycolytica ATCC 29315	2256647	1427	1	1	0	0	0	1	0	0	0	0	0	0	0	0
NZ_CP007573.1	1328	Streptococcus anginosus	2036353	1278	1	1	0	0	0	1	0	0	0	0	1	0	0	0
NC_022223.1	882944	Listonella anguillarum M3	4117885	2607	4	3	0	0	0	3	0	0	0	0	3	0	0	0
NC_014721.1	632335	Caldicellulosiruptor kristjanssonii I77R1B	2802443	1893	2	2	0	0	0	0	2	0	0	0	1	0	0	0
NZ_CP006003.1	1334629	Myxococcus fulvus 124B02	11048835	7004	14	13	0	0	0	13	0	0	0	0	1	1	1	0
NC_021814.1	1271862	Salmonella enterica subsp. enterica serovar Typhimurium var. 5- str. CFSAN001921	5089224	3312	2	2	0	0	0	2	0	0	0	0	2	0	0	0
NZ_CP012029.1	280505	Leptospira borgpetersenii serovar Ballum	4037579	2482	1	1	0	0	0	1	0	0	0	0	1	0	0	0
NZ_CP010547.1	1263763	Mycoplasma pneumoniae M1139	817045	540	0	0	0	0	0	0	0	0	0	1	0	0	0	0
NC_016751.1	443254	Marinitoga piezophila KA3	2244793	1406	1	1	0	0	0	1	0	0	0	1	1	0	0	0
NC_018498.1	662947	Mycoplasma genitalium M2288	579558	389	0	0	0	0	0	0	0	0	0	0	0	0	0	0
NC_011146.1	404380	Geobacter bemidjiensis Bem	4615150	2923	2	2	0	0	0	2	0	0	0	0	1	0	0	0
NC_020812.1	349215	Micavibrio aeruginosavorus EPB	2458610	1638	1	1	0	0	0	1	0	0	0	1	1	0	0	0
NC_009882.1	392021	Rickettsia rickettsii str. 'Sheila Smith'	1257710	818	1	1	0	0	0	1	0	0	0	0	1	0	0	0
NZ_CP008760.1	266265	Burkholderia xenovorans LB400	9702951	6313	1	1	0	0	0	1	0	0	0	0	0	0	0	0
NC_004567.2	220668	Lactobacillus plantarum WCFS1	3348624	2176	3	3	0	0	0	3	0	0	0	0	0	0	0	0
NZ_CP007202.1	1454006	Siansivirga zeaxanthinifaciens CC-SAMT-1	3303986	2135	4	3	0	0	0	3	0	0	0	1	3	0	0	0
NC_013165.1	471855	Slackia heliotrinireducens DSM 20476	3165038	2000	1	1	0	0	0	1	0	0	0	1	1	0	0	0
NZ_CP009427.1	1773	Mycobacterium tuberculosis	4410945	2868	0	0	0	0	0	0	0	0	0	1	0	0	0	0
NC_017375.1	585538	Helicobacter pylori 83	1617426	1059	1	1	0	0	0	1	0	0	0	1	1	0	0	0
NZ_CP004351.1	1285583	Corynebacterium casei LMG S-19264	3132213	2081	3	3	0	0	0	3	0	0	0	1	3	0	0	0
NZ_CP005986.1	637389	Acidithiobacillus caldus ATCC 51756	2987045	2013	2	2	0	0	0	2	0	0	0	1	2	0	0	0
NZ_CCSE01000001.1	1461582	Jeotgalicoccus sp. 13MG44_air	2191063	1388	2	2	0	0	0	2	0	0	0	1	2	0	0	0
NZ_CP010052.1	224308	Bacillus subtilis subsp. subtilis str. 168	4215619	2684	6	6	0	0	0	1	5	0	0	0	4	0	0	0
NC_009486.1	390874	Thermotoga petrophila RKU-1	1823511	1183	0	0	0	0	0	0	0	0	0	1	0	0	0	0
NZ_CP011442.1	520	Bordetella pertussis	4109988	2717	6	5	0	0	0	3	2	0	0	0	5	0	0	0
NC_015172.1	645991	Syntrophobotulus glycolicus DSM 8271	3406739	2294	0	0	0	0	0	0	0	0	0	1	0	0	0	0
NZ_CP006659.1	1263871	Klebsiella pneumoniae ATCC BAA-2146	5781127	3615	3	3	0	0	0	2	1	0	0	1	3	0	0	0
NZ_AHJK01000001.1	1132497	Sulfolobus islandicus M.16.2	2645252	1755	3	3	0	0	0	3	0	0	0	1	3	0	0	0
NZ_CP008695.1	1314	Streptococcus pyogenes	1846477	1185	2	1	0	0	0	0	1	0	0	0	1	0	0	0
NC_017200.1	930170	Bacillus thuringiensis serovar finitimus YBT-020	5682383	3664	3	3	0	0	0	2	1	0	0	0	2	0	0	0
NZ_AP012326.1	1150423	Bifidobacterium dentium JCM 1195 = DSM 20436	2635669	1611	5	5	0	0	0	5	0	0	0	0	0	0	0	0
NC_014909.2	859654	Candidatus Blochmannia vafer str. BVAF	722585	431	0	0	0	0	0	0	0	0	0	1	0	0	0	0
NZ_CP007139.1	661478	Fimbriimonas ginsengisoli Gsoil 348	5231762	3406	3	2	0	1	0	2	0	1	0	1	2	0	1	0
NC_011900.1	561276	Streptococcus pneumoniae ATCC 700669	2221315	1455	2	2	0	0	0	2	0	0	0	0	2	0	0	0
NC_014392.1	608506	Caldicellulosiruptor obsidiansis OB47	2532343	1605	1	1	0	0	0	1	0	0	0	1	1	0	0	0
NC_019386.1	751945	Thermus oshimai JL-2	2401329	1589	1	1	0	0	0	1	0	0	0	0	0	0	0	0
NZ_CP007494.1	1247649	Bordetella holmesii ATCC 51541	3699674	2324	1	1	0	0	0	1	0	0	0	0	1	0	0	0
NC_016613.1	1116375	Vibrio sp. EJY3	5452646	3553	2	2	0	0	0	2	0	0	0	0	0	0	0	0
NZ_CP008995.1	611301	Xanthomonas citri subsp. citri	5269254	3355	1	1	0	0	0	0	1	0	0	1	1	0	0	0
NC_004663.1	226186	Bacteroides thetaiotaomicron VPI-5482	6293399	4178	7	7	0	0	0	7	0	0	0	0	0	0	0	0
NC_021897.1	907268	Chlamydia trachomatis RC-L2(s)/3	1046171	687	0	0	0	0	0	0	0	0	0	0	0	0	0	0
NZ_CP011118.1	630	Yersinia enterocolitica	4837317	3078	4	4	0	0	0	4	0	0	0	1	4	0	0	0
NC_009778.1	290339	Cronobacter sakazakii ATCC BAA-894	4530777	2777	4	3	1	0	0	1	3	0	0	1	3	0	1	0
NZ_CP011131.1	262324	Lysobacter gummosus	6056618	3869	3	3	0	0	0	3	0	0	0	0	1	0	0	0
NC_008570.1	380703	Aeromonas hydrophila subsp. hydrophila ATCC 7966	4744448	3015	1	1	0	0	0	1	0	0	0	1	1	0	0	0
NC_010169.1	470137	Brucella suis ATCC 23445	3324607	2154	1	1	0	0	0	0	0	0	0	1	1	0	0	0
NZ_CP009450.1	61647	Pluralibacter gergoviae	5489680	3473	5	5	0	0	0	5	0	0	0	1	5	0	0	0
NC_009488.1	357244	Orientia tsutsugamushi str. Boryong	2127051	1397	1	1	0	0	0	1	0	0	0	1	1	0	0	0
NZ_CP012160.1	1458307	Octadecabacter temperatus	3264628	2062	3	3	0	0	0	3	0	0	0	1	3	0	0	0
NC_006570.2	177416	Francisella tularensis subsp. tularensis SCHU S4	1892775	1246	1	1	0	0	0	1	0	0	0	0	1	0	0	0
NC_015703.1	761193	Runella slithyformis DSM 19594	6919729	4354	8	8	0	0	0	8	0	0	0	1	8	0	0	0
NC_008209.1	375451	Roseobacter denitrificans OCh 114	4331234	2802	1	1	0	0	0	0	1	0	0	1	1	0	0	0
NC_012785.1	521045	Kosmotoga olearia TBF 19.5.1	2302126	1564	2	2	0	0	0	2	0	0	0	1	2	0	0	0
NZ_CP006686.1	1385723	Campylobacter jejuni subsp. jejuni NCTC 11168-Kf1	1641480	1059	0	0	0	0	0	0	0	0	0	0	0	0	0	0
NZ_CP011278.1	1390	Bacillus amyloliquefaciens	3903017	2501	3	3	0	0	0	0	3	0	0	0	3	0	0	0
NZ_CP007142.1	1445510	Gynuella sunshinyii YC6258	6475959	4166	4	4	0	0	0	4	0	0	0	1	4	0	0	0
NZ_CP011428.1	59201	Salmonella enterica subsp. enterica	5190370	3345	1	1	0	0	0	1	0	0	0	0	1	0	0	0
NC_014639.1	720555	Bacillus atrophaeus 1942	4168266	2725	0	0	0	0	0	0	0	0	0	0	0	0	0	0
NZ_CP006944.1	1434214	Mannheimia varigena USDA-ARS-USMARC-1312	2131927	1376	2	2	0	0	0	2	0	0	0	0	2	0	0	0
NZ_CP009049.1	54388	Salmonella enterica subsp. enterica serovar Paratyphi A	4599018	2863	4	4	0	0	0	4	0	0	0	0	4	0	0	0
NZ_CP011958.1	129394	Xanthomonas oryzae pv. oryzicola	5008292	3194	0	0	0	0	0	0	0	0	0	1	0	0	0	0
NC_014375.1	633149	Brevundimonas subvibrioides ATCC 15264	3445263	2180	2	2	0	0	0	2	0	0	0	1	2	0	0	0
NC_017951.1	1071762	Chlamydia trachomatis F/SW4	1042736	699	1	1	0	0	0	1	0	0	0	0	1	0	0	0
NZ_CP010556.1	1390	Bacillus amyloliquefaciens	3905973	2461	0	0	0	0	0	0	0	0	0	0	0	0	0	0
NZ_CP006910.1	1427374	Streptococcus agalactiae CNCTC 10/84	2013842	1274	2	2	0	0	0	2	0	0	0	0	2	0	0	0
NC_017743.1	1127744	Bacillus sp. JS	4120406	2627	2	2	0	0	0	1	1	0	0	0	1	0	0	0
NC_008027.1	384676	Pseudomonas entomophila L48	5888780	3728	3	3	0	0	0	2	0	0	0	0	1	0	0	0
NC_009142.1	405948	Saccharopolyspora erythraea NRRL 2338	8212805	5251	5	5	0	0	0	5	0	0	0	1	5	0	0	0
NC_017728.1	1126011	Listeria monocytogenes 07PF0776	2901562	1833	3	3	0	0	0	3	0	0	0	0	3	0	0	0
NC_015948.1	634497	Haloarcula hispanica ATCC 33960	3890005	2417	2	1	0	0	0	1	0	0	0	0	1	0	0	0
NZ_CP011267.1	113653	Geoglobus ahangari	1770093	1131	3	3	0	0	0	3	0	0	0	1	3	0	0	0
NC_021200.1	1199187	Mycobacterium avium subsp. paratuberculosis MAP4	4829424	3047	2	2	0	0	0	2	0	0	0	0	2	0	0	0
NC_009637.1	426368	Methanococcus maripaludis C7	1772694	1146	1	1	0	0	0	1	0	0	0	0	0	0	0	0
NC_012803.1	465515	Micrococcus luteus NCTC 2665	2501097	1611	2	2	0	0	0	2	0	0	0	1	2	0	0	0
NC_008024.1	370554	Streptococcus pyogenes MGAS10750	1937111	1218	0	0	0	0	0	0	0	0	0	0	0	0	0	0
NC_009616.1	391009	Thermosipho melanesiensis BI429	1915238	1232	3	3	0	0	0	3	0	0	0	1	3	0	0	0
NZ_CP012144.1	90371	Salmonella enterica subsp. enterica serovar Typhimurium	4799793	3009	1	1	0	0	0	1	0	0	0	0	1	0	0	0
NC_009634.1	406327	Methanococcus vannielii SB	1720048	1023	0	0	0	0	0	0	0	0	0	0	0	0	0	0
NC_018522.1	1193292	Klebsiella pneumoniae subsp. pneumoniae 1084	5386705	3399	3	3	0	0	0	3	0	0	0	0	3	0	0	0
NC_009697.1	441770	Clostridium botulinum A str. ATCC 19397	3863450	2382	1	1	0	0	0	0	1	0	0	0	1	0	0	0
NZ_CP012475.1	79880	Bacillus clausii	4296341	2777	4	4	0	0	0	4	0	0	0	0	0	0	0	0
NZ_ARWD01000001.1	1006598	Serratia plymuthica RVH1	5514320	3362	3	3	0	0	0	1	2	0	0	0	2	0	1	0
NC_006908.1	267748	Mycoplasma mobile 163K	777079	512	0	0	0	0	0	0	0	0	0	0	0	0	0	0
NZ_CP010525.1	1398	Bacillus coagulans	3624641	2301	3	3	0	0	0	3	0	0	0	0	2	0	0	0
NC_020388.1	268739	Natronomonas moolapensis 8.8.11	2912573	1878	2	1	0	1	0	1	0	1	0	1	2	0	0	0
NC_012489.1	379066	Gemmatimonas aurantiaca T-27	4636964	3020	3	3	0	0	0	3	0	0	0	1	3	0	0	0
NC_023065.1	1430440	Magnetospirillum gryphiswaldense MSR-1 v2	4365796	2858	1	1	0	0	0	1	0	0	0	1	1	0	0	0
NZ_CP009493.1	1299330	Mycobacterium avium subsp. avium 2285 (R)	5169415	3250	4	4	0	0	0	4	0	0	0	0	4	0	0	0
NC_022544.1	568709	Salmonella enterica subsp. enterica serovar Typhimurium str. DT2	4814801	3066	3	3	0	0	0	3	0	0	0	0	3	0	0	0
NC_008023.1	370553	Streptococcus pyogenes MGAS2096	1860355	1194	0	0	0	0	0	0	0	0	0	0	0	0	0	0
NZ_CP002703.1	1009859	Buchnera aphidicola str. F009 (Myzus persicae)	651310	396	1	0	0	0	0	0	0	0	0	0	0	0	0	0
NC_014500.1	198628	Dickeya dadantii 3937	4922802	3216	6	6	0	0	0	6	0	0	0	1	6	0	0	0
NC_008312.1	203124	Trichodesmium erythraeum IMS101	7750108	5027	5	4	0	0	0	4	0	0	0	1	4	0	0	0
NZ_CP009761.1	33033	Parvimonas micra	1627009	1051	0	0	0	0	0	0	0	0	0	1	0	0	0	0
NC_012526.1	546414	Deinococcus deserti VCD115	3855329	2539	4	4	0	0	0	4	0	0	0	0	0	0	0	0
NC_014666.1	298654	Frankia sp. EuI1c	8815781	5655	9	9	0	0	0	9	0	0	0	0	0	0	2	0
NC_007908.1	338969	Rhodoferax ferrireducens T118	4969784	3101	0	0	0	0	0	0	0	0	0	1	0	0	0	0
NZ_CP010836.1	1609977	Sphingomonas hengshuiensis	5228389	3365	2	2	0	0	0	2	0	0	0	1	2	0	0	0
NC_013016.1	662598	Neisseria meningitidis alpha14	2145295	1358	1	1	0	0	0	1	0	0	0	0	1	0	0	0
NZ_CP010402.1	46170	Staphylococcus aureus subsp. aureus	2824170	1839	1	1	0	0	0	1	0	0	0	0	1	0	0	0
NC_011498.1	570508	Helicobacter pylori P12	1684038	1050	1	1	0	0	0	1	0	0	0	1	1	0	0	0
NZ_CP011058.1	1126833	Paenibacillus beijingensis	5749967	3608	2	2	0	0	0	2	0	0	0	0	0	0	0	0
NC_015713.1	331113	Simkania negevensis Z	2628375	1723	0	0	0	0	0	0	0	0	0	1	0	0	0	0
NC_007779.1	316407	Escherichia coli str. K-12 substr. W3110	4646332	2997	4	2	2	0	0	2	2	0	0	0	3	1	0	0
NZ_CP008841.1	571	Klebsiella oxytoca	6311385	4040	2	2	0	0	0	2	0	0	0	0	0	0	1	0
NC_013169.1	478801	Kytococcus sedentarius DSM 20547	2785024	1772	1	1	0	0	0	1	0	0	0	1	1	0	0	0
NZ_CP011452.2	1267766	Altererythrobacter atlanticus	3475106	2240	1	1	0	0	0	1	0	0	0	1	1	0	0	0
NC_021905.1	1328306	Rhizobium etli bv. mimosae str. Mim1	7197998	4592	5	5	0	0	0	5	0	0	0	0	0	0	0	0
NC_014751.1	880447	Mycoplasma leachii PG50	1008951	621	0	0	0	0	0	0	0	0	0	0	0	0	0	0
NZ_CP011536.1	1381124	Lactobacillus fermentum 3872	2330492	1462	2	2	0	0	0	2	0	0	0	0	0	0	0	0
NZ_CP006713.1	1385940	Bifidobacterium breve JCM 7019	2359009	1508	1	1	0	0	0	0	0	1	0	0	1	0	0	0
NZ_CP012513.1	600	Salmonella enterica subsp. enterica serovar Thompson	4708710	2976	3	3	0	0	0	3	0	0	0	0	3	0	0	0
NC_013893.1	698737	Staphylococcus lugdunensis HKU09-01	2658366	1717	0	0	0	0	0	0	0	0	0	0	0	0	0	0
NC_016783.1	698972	Corynebacterium diphtheriae INCA 402	2449071	1626	1	1	0	0	0	1	0	0	0	0	1	0	0	0
NZ_CP009144.1	382	Sinorhizobium meliloti	6733414	4317	5	4	0	0	0	4	0	0	0	0	4	0	0	0
NC_009441.1	376686	Flavobacterium johnsoniae UW101	6096872	3942	1	1	0	0	0	1	0	0	0	1	1	0	0	0
NZ_CP012074.1	1236517	Prevotella fusca JCM 17724	3261806	2130	3	3	0	0	0	3	0	0	0	1	3	0	0	0
NC_014774.1	658172	Candidatus Liberibacter solanacearum CLso-ZC1	1258278	734	0	0	0	0	0	0	0	0	0	0	0	0	0	0
NC_013729.1	479435	Kribbella flavida DSM 17836	7579488	4922	4	4	0	0	0	4	0	0	0	1	4	0	0	0
NZ_CP009451.1	158822	Cedecea neteri	4876443	3105	3	3	0	0	0	3	0	0	0	1	3	0	0	0
NZ_CP009256.1	470	Acinetobacter baumannii	3803317	2378	4	4	0	0	0	4	0	0	0	0	4	0	0	0
NC_023150.1	1435356	Rhodococcus pyridinivorans SB3094	5590512	3609	2	2	0	0	0	2	0	0	0	0	0	0	0	0
NZ_CP006571.1	1229831	Chlamydia avium 10DC88	1048269	627	1	1	0	0	0	1	0	0	0	0	0	0	0	0
NC_015714.1	545776	Treponema paraluiscuniculi Cuniculi A	1133390	693	2	2	0	0	0	0	2	0	0	1	2	0	0	0
NZ_CP007252.1	1244121	Salmonella enterica subsp. enterica serovar Enteritidis str. EC20111175	4679808	3014	2	2	0	0	0	2	0	0	0	0	2	0	0	0
NZ_CP010445.1	83333	Escherichia coli K-12	4682086	2942	1	0	1	0	0	0	1	0	0	0	0	1	0	0
NZ_CP006664.1	667120	Edwardsiella tarda 080813	4329652	2695	0	0	0	0	0	0	0	0	0	0	0	0	0	0
NC_015389.1	700015	Coriobacterium glomerans PW2	2115681	1329	3	3	0	0	0	3	0	0	0	1	3	0	0	0
NZ_CP007063.1	457405	Fusobacterium nucleatum subsp. animalis 7_1	2514029	1585	2	2	0	0	0	2	0	0	0	0	1	0	0	0
NC_008825.1	420662	Methylibium petroleiphilum PM1	4643639	2952	2	2	0	0	0	2	0	0	0	1	2	0	0	0
NZ_CP010528.1	1590	Lactobacillus plantarum	3284260	2127	1	1	0	0	0	1	0	0	0	0	0	0	0	0
NC_021733.1	1096996	Acinetobacter baumannii BJAB0715	4053889	2600	2	2	0	0	0	2	0	0	0	0	2	0	0	0
NC_013642.1	590168	Thermotoga naphthophila RKU-10	1809823	1125	0	0	0	0	0	0	0	0	0	1	0	0	0	0
NZ_CP008891.1	1306417	Burkholderia pseudomallei MSHR5858	7072128	4509	3	3	0	0	0	1	2	0	0	0	3	0	0	0
NZ_CP012028.1	485	Neisseria gonorrhoeae	2173235	1349	3	3	0	0	0	3	0	0	0	1	3	0	0	0
NC_015437.1	546271	Selenomonas sputigena ATCC 35185	2568361	1683	0	0	0	0	0	0	0	0	0	1	0	0	0	0
NC_018631.1	1229756	Leuconostoc gelidum JB7	1893499	1223	5	5	0	0	0	5	0	0	0	0	0	0	0	0
NZ_CP009323.1	28095	Burkholderia gladioli	8899459	5712	5	5	0	0	0	5	0	0	0	0	1	0	1	0
NC_018224.1	406552	Natrinema sp. J7-2	3793615	2449	2	2	0	0	0	2	0	0	0	1	2	0	0	0
NC_009633.1	293826	Alkaliphilus metalliredigens QYMF	4929566	3128	4	4	0	0	0	4	0	0	0	1	4	0	0	0
NC_013715.1	680646	Rothia mucilaginosa DY-18	2264603	1537	0	0	0	0	0	0	0	0	0	1	0	0	0	0
NC_004116.1	208435	Streptococcus agalactiae 2603V/R	2160267	1368	1	1	0	0	0	1	0	0	0	0	1	0	0	0
NC_006576.1	269084	Synechococcus elongatus PCC 6301	2696255	1749	0	0	0	0	0	0	0	0	0	1	0	0	0	0
NC_016001.1	1034807	Flavobacterium branchiophilum FL-15	3563292	2268	3	3	0	0	0	3	0	0	0	1	3	0	0	0
NC_022516.1	1380773	Streptococcus suis YB51	2043655	1277	0	0	0	0	0	0	0	0	0	0	0	0	0	0
NZ_CP006630.1	1368166	Staphylococcus aureus subsp. aureus SA268	2833899	1789	2	2	0	0	0	2	0	0	0	0	2	0	0	0
NC_017547.1	393127	Listeria monocytogenes Finland 1998	2874431	1854	9	9	0	0	0	8	1	0	0	0	9	0	0	0
NC_017317.1	945711	Corynebacterium ulcerans 809	2502095	1579	3	3	0	0	0	3	0	0	0	0	0	0	0	0
NC_016894.1	931626	Acetobacterium woodii DSM 1030	4044777	2541	1	1	0	0	0	1	0	0	0	1	1	0	0	0
NZ_CP009301.1	313590	Dokdonia sp. MED134	3302548	2165	3	3	0	0	0	3	0	0	0	1	3	0	0	0
NC_017067.1	1163748	Marinobacter hydrocarbonoclasticus ATCC 49840	3989480	2534	3	3	0	0	0	3	0	0	0	1	3	0	0	0
NZ_CP006951.1	1432061	Dehalococcoides mccartyi CG5	1362151	884	2	1	0	0	0	1	0	0	0	0	1	0	0	0
NC_020387.1	1193806	Dehalococcoides mccartyi BTF08	1452335	953	0	0	0	0	0	0	0	0	0	0	0	0	0	0
NZ_CP009504.1	1434102	Methanosarcina sp. WH1	3914091	2496	2	2	0	0	0	1	1	0	0	0	0	0	0	0
NC_020913.1	1236689	Candidatus Methanomethylophilus alvus Mx1201	1666795	1091	0	0	0	0	0	0	0	0	0	1	0	0	0	0
NC_010644.1	445932	Elusimicrobium minutum Pei191	1643562	978	2	1	0	0	0	1	0	0	0	1	1	0	0	0
NZ_CP007656.1	959	Bdellovibrio bacteriovorus	3830427	2448	2	2	0	0	0	2	0	0	0	1	2	0	0	0
NZ_CP011934.1	214675	Leptospira interrogans serovar Manilae	4667354	2983	2	2	0	0	0	2	0	0	0	0	2	0	0	0
NZ_CP006715.1	1385942	Bifidobacterium breve 689b	2331707	1552	1	1	0	0	0	1	0	0	0	0	0	0	0	0
NZ_AP014622.1	287	Pseudomonas aeruginosa	6814936	4464	7	7	0	0	0	7	0	0	0	0	6	0	0	0
NC_005362.1	257314	Lactobacillus johnsonii NCC 533	1992676	1322	1	1	0	0	0	1	0	0	0	0	1	0	0	0
NZ_CP012591.1	669502	Candidatus Profftella armatura	463023	323	0	0	0	0	0	0	0	0	0	1	0	0	0	0
NZ_CP009552.1	565033	Geoglobus acetivorans	1860815	1122	1	1	0	0	0	1	0	0	0	1	1	0	0	0
NC_023149.1	1427342	Pseudomonas aeruginosa SCV20265	6725183	4340	2	2	0	0	0	2	0	0	0	0	2	0	0	0
NC_006138.1	177439	Desulfotalea psychrophila LSv54	3659634	2254	4	3	0	0	0	3	0	0	0	1	3	0	0	0
NC_007294.1	262723	Mycoplasma synoviae 53	799476	542	0	0	0	0	0	0	0	0	0	0	0	0	0	0
NC_017381.1	985080	Helicobacter pylori 2018	1562832	993	0	0	0	0	0	0	0	0	0	0	0	0	0	0
NZ_LN649235.1	595	Salmonella enterica subsp. enterica serovar Infantis	4710675	2906	0	0	0	0	0	0	0	0	0	0	0	0	0	0
NC_017361.1	907239	Helicobacter pylori SouthAfrica7	1679829	1029	0	0	0	0	0	0	0	0	0	0	0	0	0	0
NZ_CP007037.1	1435046	Shigella flexneri G1663	4817311	3105	2	1	1	0	0	1	1	0	0	0	2	0	0	0
NC_002932.3	194439	Chlorobium tepidum TLS	2154946	1339	2	2	0	0	0	2	0	0	0	1	2	0	0	0
NC_016584.1	768706	Desulfosporosinus orientis DSM 765	5863081	3735	4	4	0	0	0	4	0	0	0	0	0	0	0	0
NC_018027.1	710421	Mycobacterium chubuense NBB4	6342624	4024	6	5	0	0	0	5	0	0	0	0	1	0	0	0
NZ_LN626917.1	1280	Staphylococcus aureus	2874302	1817	0	0	0	0	0	0	0	0	0	0	0	0	0	0
NC_005295.2	254945	Ehrlichia ruminantium str. Welgevonden	1516355	1028	0	0	0	0	0	0	0	0	0	1	0	0	0	0
NC_008783.1	360095	Bartonella bacilliformis KC583	1445021	947	0	0	0	0	0	0	0	0	0	1	0	0	0	0
NC_012578.1	579112	Vibrio cholerae M66-2	3938905	2510	1	1	0	0	0	1	0	0	0	1	1	0	0	0
NC_020514.1	1129794	Paraglaciecola psychrophila 170	5413691	3378	5	5	0	0	0	5	0	0	0	1	5	0	0	0
NC_014650.1	581103	Geobacillus sp. Y4.1MC1	3911947	2521	1	1	0	0	0	0	1	0	0	1	1	0	0	0
NZ_CP008739.1	1400868	Pseudomonas aeruginosa VRFPA04	6818030	4367	3	3	0	0	0	3	0	0	0	0	2	0	0	0
NC_009975.1	444158	Methanococcus maripaludis C6	1744193	1096	2	2	0	0	0	2	0	0	0	0	0	0	0	0
NZ_CP006740.1	1401256	Xylella fastidiosa MUL0034	2666577	1746	0	0	0	0	0	0	0	0	0	0	0	0	0	0
NC_021491.1	1331671	Pseudomonas putida H8234	6870827	4308	2	2	0	0	0	2	0	0	0	0	0	0	0	0
NZ_CP011985.1	1284804	Klebsiella pneumoniae UHKPC07	5523776	3546	2	2	0	0	0	1	1	0	0	1	2	0	0	0
NC_018644.1	744985	alpha proteobacterium HIMB59	1410127	0	0	0	0	0	0	0	0	0	0	0	0	0	0	0
NC_010511.1	426117	Methylobacterium sp. 4-46	7737025	4983	3	3	0	0	0	3	0	0	0	1	3	0	0	0
NC_009767.1	383372	Roseiflexus castenholzii DSM 13941	5723298	3727	4	4	0	0	0	4	0	0	0	1	4	0	0	0
NC_017349.1	985006	Staphylococcus aureus subsp. aureus LGA251	2753827	1752	2	2	0	0	0	2	0	0	0	0	2	0	0	0
NZ_CP009612.1	1314	Streptococcus pyogenes	1944537	1214	1	1	0	0	0	1	0	0	0	0	1	0	0	0
NC_016937.1	1001534	Francisella tularensis subsp. tularensis TI0902	1892744	1216	1	1	0	0	0	1	0	0	0	0	1	0	0	0
NZ_CM001835.1	1159083	Streptococcus pneumoniae PCS8235	2076531	1308	1	1	0	0	0	1	0	0	0	0	1	0	0	0
NC_021899.1	1007871	Chlamydia trachomatis RC-J/971	1038442	621	0	0	0	0	0	0	0	0	0	0	0	0	0	0
NZ_LN681225.1	449	Legionella hackeliae	3570857	2214	0	0	0	0	0	0	0	0	0	0	0	0	0	0
NC_011901.1	396588	Thioalkalivibrio sulfidiphilus HL-EbGr7	3464554	2200	2	2	0	0	0	2	0	0	0	0	0	0	0	0
NZ_CP011542.1	571915	Corynebacterium mustelae	3474226	2200	1	1	0	0	0	1	0	0	0	0	0	0	0	0
NC_018867.1	1131462	Dehalobacter sp. CF	3092048	2003	3	3	0	0	0	0	3	0	0	1	3	0	0	0
NZ_CP009538.1	272560	Burkholderia pseudomallei K96243	7247614	4678	0	0	0	0	0	0	0	0	0	0	0	0	0	0
NC_012846.1	634504	Bartonella grahamii as4aup	2369520	1547	2	2	0	0	0	2	0	0	0	0	0	0	0	0
NC_018656.1	1229909	Candidatus Nitrosopumilus sp. AR2	1690905	1052	0	0	0	0	0	0	0	0	0	1	0	0	0	0
NC_016589.1	1097668	Burkholderia sp. YI23	8896411	5851	7	7	0	0	0	4	3	0	0	0	1	0	0	0
NZ_CP008928.1	149539	Salmonella enterica subsp. enterica serovar Enteritidis	4738299	3112	5	5	0	0	0	5	0	0	0	0	5	0	0	0
NC_020294.1	1208919	Candidatus Kinetoplastibacterium desouzaii TCC079E	833125	522	0	0	0	0	0	0	0	0	0	0	0	0	0	0
NZ_CP009048.1	237609	Pseudomonas alkylphenolia	5764622	3744	1	1	0	0	0	1	0	0	0	0	0	0	0	0
NZ_CP009935.1	349746	Yersinia pestis Angola	4674610	3005	3	3	0	0	0	1	1	1	0	1	3	0	0	0
NC_003028.3	170187	Streptococcus pneumoniae TIGR4	2160842	1345	0	0	0	0	0	0	0	0	0	0	0	0	0	0
NZ_CP012347.1	1029979	Salmonella enterica subsp. enterica serovar Pullorum str. ATCC 9120	4781492	3000	3	3	0	0	0	3	0	0	0	0	3	0	0	0
NC_018679.1	1004787	Alteromonas macleodii str. 'Balearic Sea AD45'	4674885	3016	1	1	0	0	0	1	0	0	0	0	0	0	0	0
NC_021082.1	1316932	Mannheimia haemolytica M42548	2731870	1745	0	0	0	0	0	0	0	0	0	0	0	0	0	0
NC_014215.1	754252	Propionibacterium freudenreichii subsp. shermanii CIRM-BIA1	2616384	1700	2	2	0	0	0	2	0	0	0	0	0	0	0	0
NZ_CP009923.1	813	Chlamydia trachomatis	1046364	670	0	0	0	0	0	0	0	0	0	0	0	0	0	0
NC_011047.1	37692	Candidatus Phytoplasma mali	601943	389	2	1	0	0	0	1	0	0	0	0	0	0	0	0
NC_020990.1	457425	Streptomyces albus J1074	6841649	4302	4	4	0	0	0	4	0	0	0	0	0	0	1	0
NZ_CP007503.1	34085	Riemerella anatipestifer	2152519	1367	0	0	0	0	0	0	0	0	0	0	0	0	0	0
NZ_CP009083.1	149539	Salmonella enterica subsp. enterica serovar Enteritidis	4678914	2924	2	2	0	0	0	2	0	0	0	0	2	0	0	0
NC_009483.1	351605	Geobacter uraniireducens Rf4	5136364	3252	5	5	0	0	0	5	0	0	0	1	5	0	0	0
NZ_CP011320.1	562	Escherichia coli	4633461	2905	2	1	0	0	0	1	0	0	0	0	1	0	0	0
NC_016147.2	1045855	Pseudoxanthomonas spadix BD-a59	3452554	2231	3	3	0	0	0	3	0	0	0	1	3	0	0	0
NC_015565.1	868595	Desulfotomaculum carboxydivorans CO-1-SRB	2892255	1841	0	0	0	0	0	0	0	0	0	0	0	0	0	0
NZ_CP009019.1	611301	Xanthomonas citri subsp. citri	5223747	3407	3	3	0	0	0	0	3	0	0	0	3	0	0	0
NZ_CP010523.1	244366	Klebsiella variicola	5521203	3525	2	2	0	0	0	0	1	1	0	0	0	1	0	0
NC_012659.1	592021	Bacillus anthracis str. A0248	5503926	3541	3	2	0	0	0	1	1	0	0	0	2	0	0	0
NC_020540.2	1207470	Streptococcus pyogenes M1 476	1831128	1154	2	2	0	0	0	2	0	0	0	0	2	0	0	0
NC_022569.1	85569	Salmonella enterica subsp. enterica serovar Typhimurium str. DT104	5027665	3172	2	2	0	0	0	2	0	0	0	0	2	0	0	0
NZ_CP010551.1	1233262	Mycoplasma pneumoniae PO1	817216	493	0	0	0	0	0	0	0	0	0	0	0	0	0	0
NC_008601.1	401614	Francisella tularensis subsp. novicida U112	1910031	1255	1	1	0	0	0	1	0	0	0	0	1	0	0	0
NZ_CP010282.1	796731	Salmonella enterica subsp. enterica serovar Newport str. CVM 21538	4795842	3052	2	2	0	0	0	2	0	0	0	0	2	0	0	0
NZ_CP009287.1	189425	Paenibacillus graminis	7166464	4455	6	5	0	0	0	4	1	0	0	0	0	0	0	0
NZ_CP006929.1	1427366	Dickeya zeae EC1	4532364	2929	2	2	0	0	0	2	0	0	0	1	2	0	0	0
NC_017378.1	1055528	Helicobacter pylori Puno120	1637762	1019	0	0	0	0	0	0	0	0	0	0	0	0	0	0
NC_019792.1	797304	Natronobacterium gregoryi SP2	3788356	2492	2	2	0	0	0	2	0	0	0	1	2	0	0	0
NZ_CP006949.1	1432059	Dehalococcoides mccartyi CG1	1486678	963	3	3	0	0	0	1	2	0	0	0	0	0	0	0
NZ_CP007241.1	1314	Streptococcus pyogenes	1796152	1112	2	2	0	0	0	1	1	0	0	0	2	0	0	0
NC_010803.1	290315	Chlorobium limicola DSM 245	2763181	1698	3	3	0	0	0	3	0	0	0	1	3	0	0	0
NC_010170.1	94624	Bordetella petrii	5287950	3523	0	0	0	0	0	0	0	0	0	0	0	0	0	0
NZ_CP009001.1	611301	Xanthomonas citri subsp. citri	5220936	3359	7	6	0	0	0	0	6	0	0	0	7	0	0	0
NZ_CP012508.1	1238	Piscirickettsia salmonis	3509678	2147	8	8	0	0	0	8	0	0	0	1	8	0	0	0
NC_021725.1	1318634	Lactobacillus rhamnosus LOCK908	2990900	1897	3	3	0	0	0	3	0	0	0	0	0	0	0	0
NC_022777.1	1231072	Clostridium tetani 12124569	2865850	1753	3	3	0	0	0	3	0	0	0	0	3	0	0	0
NZ_CP011602.1	61648	Kluyvera intermedia	6166452	3922	5	5	0	0	0	5	0	0	0	1	5	0	0	0
NC_017028.1	1105111	Candidatus Rickettsia amblyommii str. GAT-30V	1480884	961	1	1	0	0	0	0	0	0	0	0	1	0	0	0
NC_011666.1	395965	Methylocella silvestris BL2	4305430	2732	3	3	0	0	0	3	0	0	0	1	3	0	0	0
NC_014923.1	765698	Mesorhizobium ciceri biovar biserrulae WSM1271	6690028	4295	1	1	0	0	0	1	0	0	0	0	1	0	0	0
NC_023137.1	1423144	Phaeobacter gallaeciensis DSM 26640	4540155	2858	4	3	1	0	0	3	1	0	0	0	2	0	1	0
NZ_CP011055.1	2287	Sulfolobus solfataricus	2727261	1785	2	2	0	0	0	2	0	0	0	1	2	0	0	0
NZ_CP010281.1	796732	Salmonella enterica subsp. enterica serovar Newport str. CVM 22513	4830769	3126	6	5	0	0	0	5	0	0	0	0	5	0	0	0
NC_017764.1	584721	Pasteurella multocida subsp. multocida str. 3480	2378127	1498	3	3	0	0	0	3	0	0	0	1	3	0	0	0
NZ_CP012898.1	1736674	Algibacter sp. HZ22	3994770	2554	4	4	0	0	0	4	0	0	0	1	4	0	0	0
NZ_CP012040.1	320787	Cyclobacterium amurskyense	6158829	3885	4	4	0	0	0	4	0	0	0	1	4	0	0	0
NZ_CP006877.1	1418105	Rhizobium gallicum bv. gallicum R602	7311190	4609	4	3	0	0	0	3	0	0	0	0	1	0	0	0
NC_000919.1	243276	Treponema pallidum subsp. pallidum str. Nichols	1138011	740	0	0	0	0	0	0	0	0	0	1	0	0	0	0
NZ_CP012675.1	585	Proteus vulgaris	3794983	2367	3	3	0	0	0	0	3	0	0	0	3	0	0	0
NC_004350.2	210007	Streptococcus mutans UA159	2032925	1290	4	4	0	0	0	4	0	0	0	0	0	1	0	0
NC_021028.1	869304	Streptococcus pneumoniae SPN034183	2037254	1294	1	1	0	0	0	1	0	0	0	0	1	0	0	0
NC_014963.1	401053	Terriglobus saanensis SP1PR4	5095226	3183	3	3	0	0	0	3	0	0	0	1	3	0	0	0
NZ_CP010973.1	28450	Burkholderia pseudomallei	7045782	4577	3	3	0	0	0	2	1	0	0	0	2	0	0	0
NC_008578.1	351607	Acidothermus cellulolyticus 11B	2443540	1598	1	1	0	0	0	1	0	0	0	1	1	0	0	0
NZ_CP009528.1	1434108	Methanosarcina barkeri MS	4574907	2953	5	5	0	0	0	5	0	0	0	0	5	0	0	0
NC_014484.1	665571	Spirochaeta thermophila DSM 6192	2472645	1559	2	2	0	0	0	2	0	0	0	1	2	0	0	0
NZ_CP011511.1	621	Shigella boydii	4574246	3000	2	1	1	0	0	1	1	0	0	0	0	2	0	0
NC_012214.1	634499	Erwinia pyrifoliae Ep1/96	4072846	2538	2	2	0	0	0	0	2	0	0	1	2	0	0	0
NZ_LN847353.1	1313	Streptococcus pneumoniae	1983415	1225	2	2	0	0	0	1	1	0	0	0	1	0	0	0
NC_019815.1	1267577	Candidatus Kinetoplastibacterium crithidii (ex Angomonas deanei ATCC 30255)	821813	529	1	1	0	0	0	1	0	0	0	1	1	0	0	0
NZ_CP010906.1	32022	Campylobacter jejuni subsp. jejuni	1612378	1031	0	0	0	0	0	0	0	0	0	0	0	0	0	0
NZ_CP011071.1	516051	Muricauda lutaonensis	3274259	2038	1	1	0	0	0	1	0	0	0	1	1	0	0	0
NC_020912.1	1280938	Pseudomonas aeruginosa B136-33	6421010	4272	7	7	0	0	0	7	0	0	0	0	6	0	1	0
NC_011894.1	460265	Methylobacterium nodulans ORS 2060	8839022	5644	3	3	0	0	0	3	0	0	0	1	3	0	0	0
NZ_CP009615.1	36809	Mycobacterium abscessus	4686331	3063	3	3	0	0	0	3	0	0	0	0	3	0	0	0
NZ_CP012146.1	340	Xanthomonas campestris pv. campestris	4908383	3088	1	1	0	0	0	1	0	0	0	0	0	0	0	0
NC_015276.1	717774	Marinomonas mediterranea MMB-1	4684316	2989	6	6	0	0	0	6	0	0	0	1	6	0	0	0
NC_020533.1	1074919	Staphylococcus aureus subsp. aureus ST228	2790688	1814	2	2	0	0	0	2	0	0	0	0	2	0	0	0
NC_017246.1	703352	Brucella melitensis M5-90	3312229	2091	2	2	0	0	0	0	0	0	0	0	2	0	0	0
NZ_CP011304.1	1641812	Microcystis aeruginosa NIES-2549	4294213	2682	5	5	0	0	0	4	1	0	0	1	5	0	0	0
NZ_CP007249.2	1412453	Salmonella enterica subsp. enterica serovar Enteritidis str. EC20090641	4712309	3087	4	3	1	0	0	3	1	0	0	0	4	0	0	0
NC_020555.1	1206745	Helicobacter cinaedi ATCC BAA-847	2240130	1497	1	1	0	0	0	1	0	0	0	0	0	0	0	0
NZ_CP008757.1	29461	Brucella suis	3313865	2251	2	2	0	0	0	0	0	0	0	0	2	0	0	0
NC_017481.1	712961	Lactobacillus salivarius CECT 5713	2136138	1318	1	1	0	0	0	1	0	0	0	0	0	0	0	0
NZ_CP009625.1	1210454	Brucella abortus 104M	3285427	2111	2	2	0	0	0	0	0	0	0	0	2	0	0	0
NZ_CP009331.1	1392	Bacillus anthracis	5504993	3473	5	5	0	0	0	1	4	0	0	0	5	0	0	0
NC_021892.1	907272	Chlamydia trachomatis J/6276tet1	1080953	701	2	1	0	0	0	1	0	0	0	0	1	0	0	0
NZ_CP011995.1	837	Porphyromonas gingivalis	2367029	1521	2	2	0	0	0	2	0	0	0	0	2	0	0	0
NC_016784.1	1114958	Bacillus methylotrophicus CAU B946	4019861	2583	4	3	0	0	0	1	2	0	0	0	2	0	0	0
NC_022530.1	1385727	Bacillus methylotrophicus NAU-B3	4204608	2679	2	1	0	0	0	0	1	0	0	0	1	0	0	0
NC_008726.1	350058	Mycobacterium vanbaalenii PYR-1	6491865	4039	1	1	0	0	0	1	0	0	0	0	0	0	0	0
NC_003901.1	192952	Methanosarcina mazei Go1	4096345	2647	5	5	0	0	0	5	0	0	0	1	5	0	0	0
NC_017431.1	707183	Chlamydia trachomatis E/11023	1043025	610	1	1	0	0	0	1	0	0	0	0	1	0	0	0
NZ_LN831035.1	727	Haemophilus influenzae	1890645	1176	0	0	0	0	0	0	0	0	0	1	0	0	0	0
NC_017031.1	1117942	Corynebacterium pseudotuberculosis P54B96	2337657	1493	1	1	0	0	0	1	0	0	0	0	1	0	0	0
NZ_CP009628.1	526977	Bacillus cereus ATCC 4342	5306298	3471	3	3	0	0	0	2	1	0	0	0	3	0	0	0
NZ_CP010567.1	813	Chlamydia trachomatis	1050536	669	1	1	0	0	0	1	0	0	0	0	1	0	0	0
NC_008576.1	156889	Magnetococcus marinus MC-1	4719581	3058	2	2	0	0	0	2	0	0	0	1	2	0	0	0
NC_012466.1	488222	Streptococcus pneumoniae JJA	2120234	1336	1	1	0	0	0	1	0	0	0	0	1	0	0	0
NZ_CP012366.1	53345	Enterococcus durans	3071804	2014	7	6	0	0	0	6	0	0	0	0	7	0	0	0
NC_020930.1	1071772	Chlamydia trachomatis L2/25667R	1038839	674	0	0	0	0	0	0	0	0	0	0	0	0	0	0
NC_006831.1	302409	Ehrlichia ruminantium str. Gardel	1499920	984	0	0	0	0	0	0	0	0	0	0	0	0	0	0
NC_009727.1	434922	Coxiella burnetii Dugway 5J108-111	2212937	1383	0	0	0	0	0	0	0	0	0	0	0	0	0	0
NC_011595.1	557600	Acinetobacter baumannii AB307-0294	3760981	2447	6	5	0	0	0	5	0	0	0	0	5	1	0	0
NZ_CP007535.2	470	Acinetobacter baumannii	3851648	2419	2	2	0	0	0	2	0	0	0	1	2	0	0	0
NC_017305.1	935298	Corynebacterium pseudotuberculosis PAT10	2335323	1592	0	0	0	0	0	0	0	0	0	0	0	0	0	0
NC_013364.1	585396	Escherichia coli O111:H- str. 11128	5766081	3686	3	0	2	1	0	0	2	0	1	0	0	3	0	0
NC_018691.1	930169	Alcanivorax dieselolei B5	4928223	3133	3	3	0	0	0	3	0	0	0	0	0	0	0	0
NZ_CP012165.1	550	Enterobacter cloacae	5160986	3241	1	1	0	0	0	1	0	0	0	0	1	0	0	0
NZ_CP012072.1	52773	Actinomyces meyeri	2049088	1303	4	4	0	0	0	4	0	0	0	1	4	0	0	0
NC_009654.1	400668	Marinomonas sp. MWYL1	5100344	3227	4	4	0	0	0	4	0	0	0	1	4	0	0	0
NZ_CP009037.1	611301	Xanthomonas citri subsp. citri	5398327	3437	3	3	0	0	0	0	3	0	0	0	3	0	0	0
NC_017265.1	547048	Yersinia pestis biovar Medievalis str. Harbin 35	4709501	3013	6	6	0	0	0	2	3	1	0	0	6	0	0	0
NC_013216.1	485916	Desulfotomaculum acetoxidans DSM 771	4545624	2812	6	6	0	0	0	6	0	0	0	1	6	0	0	0
NC_014759.1	643867	Marivirga tractuosa DSM 4126	4516490	2867	1	1	0	0	0	1	0	0	0	1	1	0	0	0
NC_018496.1	662946	Mycoplasma genitalium M6282	579504	403	0	0	0	0	0	0	0	0	0	0	0	0	0	0
NZ_CP010346.1	1639	Listeria monocytogenes	2904228	1795	2	2	0	0	0	2	0	0	0	1	2	0	0	0
NC_015224.1	994476	Yersinia enterocolitica subsp. palearctica 105.5R(r)	4621811	2870	2	2	0	0	0	2	0	0	0	0	0	0	0	0
NC_009664.2	266940	Kineococcus radiotolerans SRS30216 = ATCC BAA-149	4956672	3173	0	0	0	0	0	0	0	0	0	1	0	0	0	0
NC_007794.1	279238	Novosphingobium aromaticivorans DSM 12444	4233314	2691	3	3	0	0	0	3	0	0	0	1	3	0	0	0
NC_007955.1	259564	Methanococcoides burtonii DSM 6242	2575032	1664	1	1	0	0	0	1	0	0	0	1	1	0	0	0
NC_018704.1	698758	Amphibacillus xylanus NBRC 15112	2569486	1674	0	0	0	0	0	0	0	0	0	1	0	0	0	0
NC_009074.1	320373	Burkholderia pseudomallei 668	7040403	4499	4	4	0	0	0	1	1	1	1	0	3	0	0	0
NC_012918.1	443144	Geobacter sp. M21	4745806	3162	2	2	0	0	0	2	0	0	0	1	2	0	0	0
NC_013926.1	439481	Aciduliprofundum boonei T469	1486778	975	3	3	0	0	0	3	0	0	0	1	3	0	0	0
NC_006347.1	295405	Bacteroides fragilis YCH46	5310990	3478	3	1	0	0	0	1	0	0	0	1	2	0	0	0
NC_010725.1	441620	Methylobacterium populi BJ001	5848997	3713	4	3	0	0	0	3	0	0	0	0	0	0	1	0
NZ_AP014624.1	878220	Chryseobacterium sp. StRB126	5503743	3606	6	6	0	0	0	6	0	0	0	1	6	0	0	0
NC_014538.1	573062	Thermoanaerobacter sp. X513	2456520	1601	3	3	0	0	0	0	3	0	0	0	1	0	0	0
NC_014169.1	759350	Bifidobacterium longum subsp. longum JDM301	2477838	1603	3	3	0	0	0	2	1	0	0	0	2	0	0	0
NZ_CP012253.1	28141	Cronobacter sakazakii	4610566	2927	3	3	0	0	0	3	0	0	0	0	2	0	0	0
NC_000908.2	243273	Mycoplasma genitalium G37	580076	394	0	0	0	0	0	0	0	0	0	0	0	0	0	0
NZ_CP011367.1	106634	Thioalkalivibrio versutus	2969361	1871	1	1	0	0	0	1	0	0	0	0	0	0	0	0
NZ_CP007769.1	1500960	Campylobacter sp. RM16704	1557536	980	2	0	0	0	0	0	0	0	0	1	0	0	0	0
NC_017663.1	910348	Escherichia coli P12b	4935294	3227	4	1	3	0	0	1	3	0	0	0	2	2	0	0
NZ_CP004887.1	1308980	Klebsiella oxytoca HKOPL1	5914407	3758	2	1	0	0	0	1	0	0	0	0	0	0	0	0
NC_017527.1	1110509	Methanosaeta harundinacea 6Ac	2571034	1680	6	5	0	0	0	5	0	0	0	1	5	0	0	0
NZ_LN831048.1	1280	Staphylococcus aureus	2785220	1783	1	1	0	0	0	1	0	0	0	0	1	0	0	0
NC_014377.1	555079	Thermosediminibacter oceani DSM 16646	2280035	1490	6	6	0	0	0	6	0	0	0	1	6	0	0	0
NZ_CP009318.1	572264	Bacillus cereus 03BB102	5448107	3455	3	3	0	0	0	2	1	0	0	0	3	0	0	0
NC_017291.1	1112250	Chlamydia psittaci C19/98	1169374	754	0	0	0	0	0	0	0	0	0	0	0	0	0	0
NZ_AP012332.1	585528	Gardnerella vaginalis ATCC 14018 = JCM 11026	1667406	1083	1	1	0	0	0	1	0	0	0	0	1	0	0	0
NC_019675.1	292564	Cyanobium gracile PCC 6307	3342364	2170	1	1	0	0	0	1	0	0	0	1	1	0	0	0
NC_015425.1	929506	Clostridium botulinum BKT015925	3207592	2056	3	3	0	0	0	3	0	0	0	0	0	0	0	0
NC_017355.1	637913	Helicobacter pylori v225d	1595604	1033	1	1	0	0	0	1	0	0	0	0	1	0	0	0
NZ_CP007452.1	1286171	Eubacterium acidaminophilum DSM 3953	3055036	1950	4	4	0	0	0	4	0	0	0	0	0	0	0	0
NZ_CP012507.1	71999	Kocuria palustris	2854447	1817	1	0	0	0	0	0	0	0	0	1	0	0	0	0
NZ_CP006923.1	1420012	Klebsiella pneumoniae 30660/NJST258_1	5540936	3531	7	4	2	0	0	4	2	0	0	0	5	2	0	0
NZ_CP009533.1	216142	Pseudomonas rhizosphaerae	4688635	2911	2	2	0	0	0	2	0	0	0	0	1	0	0	0
NC_006833.1	292805	Wolbachia endosymbiont strain TRS of Brugia malayi	1080084	619	0	0	0	0	0	0	0	0	0	0	0	0	0	0
NC_019936.1	644801	Pseudomonas stutzeri RCH2	4600489	3027	1	1	0	0	0	1	0	0	0	0	0	0	0	0
NZ_CP011306.1	40324	Stenotrophomonas maltophilia	4509724	2863	3	3	0	0	0	3	0	0	0	1	3	0	0	0
NC_013968.1	309800	Haloferax volcanii DS2	4012900	2576	3	3	0	0	0	3	0	0	0	0	1	0	0	0
NC_012004.1	218495	Streptococcus uberis 0140J	1852352	1133	2	2	0	0	0	2	0	0	0	0	0	0	0	0
NZ_CP012589.1	1705617	Capnocytophaga sp. oral taxon 323	2614527	1708	1	1	0	0	0	1	0	0	0	1	1	0	0	0
NC_020796.1	1288122	Edwardsiella piscicida C07-087	3857040	2433	3	3	0	0	0	2	1	0	0	1	3	0	0	0
NZ_CP010899.1	273035	Spiroplasma kunkelii CR2-3x	1514561	979	0	0	0	0	0	0	0	0	0	0	0	0	0	0
NC_018420.1	134287	secondary endosymbiont of Heteropsylla cubana	1121596	0	0	0	0	0	0	0	0	0	0	0	0	0	0	0
NC_006510.1	235909	Geobacillus kaustophilus HTA426	3592666	2318	3	3	0	0	0	3	0	0	0	0	2	0	0	0
NC_010102.1	1016998	Salmonella enterica subsp. enterica serovar Paratyphi B str. SPB7	4858887	3107	0	0	0	0	0	0	0	0	0	0	0	0	0	0
NZ_CP012026.1	485	Neisseria gonorrhoeae	2232367	1487	1	1	0	0	0	1	0	0	0	0	1	0	0	0
NZ_CP006745.1	1401328	Candidatus Endolissoclinum faulkneri L5	1518636	987	2	2	0	0	0	2	0	0	0	1	2	0	0	0
NC_003155.4	227882	Streptomyces avermitilis MA-4680 = NBRC 14893	9119895	5769	7	7	0	0	0	7	0	0	0	0	1	0	0	0
NC_009515.1	420247	Methanobrevibacter smithii ATCC 35061	1853160	1116	2	2	0	0	0	2	0	0	0	1	2	0	0	0
NZ_CP009576.1	202752	Listeria ivanovii subsp. londoniensis	3045035	1919	2	2	0	0	0	2	0	0	0	1	2	0	0	0
NC_014218.1	644284	Arcanobacterium haemolyticum DSM 20595	1986154	1283	1	1	0	0	0	1	0	0	0	1	1	0	0	0
NC_012623.1	419942	Sulfolobus islandicus Y.N.15.51	2854410	1877	1	1	0	0	0	1	0	0	0	0	1	0	0	0
NZ_CP008810.1	1093099	Campylobacter fetus subsp. venerealis 97/608	2000424	1303	2	2	0	0	0	2	0	0	0	1	2	0	0	0
NZ_CP007230.1	367190	Yersinia similis	4964409	3089	2	2	0	0	0	2	0	0	0	0	2	0	0	0
NZ_CP007493.1	697581	Thermofilum carboxyditrophus 1505	1754190	1087	3	3	0	0	0	2	1	0	0	1	3	0	0	0
NZ_AP013355.1	1391728	Helicobacter pylori 26695-1CH	1667302	1003	3	3	0	0	0	3	0	0	0	0	3	0	0	0
NC_013172.1	446465	Brachybacterium faecium DSM 4810	3614992	2273	3	3	0	0	0	3	0	0	0	1	3	0	0	0
NZ_CP009087.1	149539	Salmonella enterica subsp. enterica serovar Enteritidis	4678571	3081	3	3	0	0	0	3	0	0	0	0	3	0	0	0
NC_009707.1	360109	Campylobacter jejuni subsp. doylei 269.97	1845106	1213	0	0	0	0	0	0	0	0	0	0	0	0	0	0
NC_017218.1	866777	Bifidobacterium breve ACS-071-V-Sch8b	2327492	1540	2	2	0	0	0	1	1	0	0	0	1	0	0	0
NZ_CP006955.1	1263831	Bibersteinia trehalosi USDA-ARS-USMARC-189	2454127	1588	2	2	0	0	0	2	0	0	0	1	2	0	0	0
NC_008816.1	146891	Prochlorococcus marinus str. AS9601	1669886	1059	2	2	0	0	0	2	0	0	0	1	2	0	0	0
NZ_CP011657.1	546	Citrobacter freundii	5390649	3444	5	5	0	0	0	5	0	0	0	0	4	1	0	0
NC_009524.1	349106	Psychrobacter sp. PRwf-1	2995049	1896	0	0	0	0	0	0	0	0	0	1	0	0	0	0
NC_015587.1	547145	Hydrogenobaculum sp. SHO	1552607	1010	1	1	0	0	0	0	1	0	0	1	1	0	0	0
NC_017082.1	335659	Bradyrhizobium sp. S23321	7231841	4623	4	4	0	0	0	4	0	0	0	0	1	0	0	0
NZ_CP007173.1	1453990	Bacillus subtilis HJ5	4012933	2492	2	2	0	0	0	2	0	0	0	0	2	0	0	0
NZ_CP010377.1	550	Enterobacter cloacae	5063734	3250	5	4	1	0	0	4	1	0	0	1	5	0	0	0
NC_009338.1	350054	Mycobacterium gilvum PYR-GCK	5982829	3881	3	2	0	0	0	2	0	0	0	0	0	0	0	0
NC_022550.1	1316444	Blattabacterium sp. (Nauphoeta cinerea)	626626	405	1	1	0	0	0	1	0	0	0	1	1	0	0	0
NC_016832.1	1132507	Salmonella enterica subsp. enterica serovar Typhi str. P-stx-12	4949783	3139	1	1	0	0	0	1	0	0	0	0	0	0	0	0
NZ_CP011020.1	587753	Pseudomonas chlororaphis	6360256	3983	2	2	0	0	0	2	0	0	0	0	0	0	0	0
NZ_CP006694.1	758847	Leptospira santarosai serovar Shermani str. LT 821	3983611	2620	1	1	0	0	0	1	0	0	0	1	1	0	0	0
NC_014921.1	943945	Mycoplasma fermentans M64	1118751	682	2	2	0	0	0	2	0	0	0	0	0	0	0	0
NC_008709.1	357804	Psychromonas ingrahamii 37	4559598	2808	1	1	0	0	0	1	0	0	0	1	1	0	0	0
NC_020830.1	313598	Polaribacter sp. MED152	2961474	1889	3	3	0	0	0	3	0	0	0	1	3	0	0	0
NZ_CP009553.2	93220	Pandoraea pnomenusa	5389285	3430	4	4	0	0	0	4	0	0	0	1	4	0	0	0
NC_015680.1	529709	Pyrococcus yayanosii CH1	1716818	1050	0	0	0	0	0	0	0	0	0	0	0	0	0	0
NC_021236.1	980422	Strawberry lethal yellows phytoplasma (CPA) str. NZSb11	959779	596	1	1	0	0	0	1	0	0	0	1	1	0	0	0
NZ_CP010444.1	83333	Escherichia coli K-12	4609629	2924	3	2	1	0	0	2	1	0	0	0	2	1	0	0
NC_011565.1	511995	Candidatus Azobacteroides pseudotrichonymphae genomovar. CFP2	1224919	774	1	0	0	0	0	0	0	0	0	1	1	0	0	0
NZ_CP009268.1	1262449	Clostridium pasteurianum DSM 525 = ATCC 6013	4352101	2752	6	6	0	0	0	6	0	0	0	0	0	0	0	0
NZ_CP011832.1	1629723	Geobacillus sp. 12AMOR1	3442724	2224	1	1	0	0	0	1	0	0	0	0	1	0	0	0
NC_020207.1	1104325	Enterococcus faecium NRRL B-2354	2849891	1729	3	3	0	0	0	3	0	0	0	0	1	0	0	0
NZ_AP014509.1	1408159	Thermotoga caldifontis AZM44c09	2014912	1228	2	2	0	0	0	2	0	0	0	0	0	0	0	0
NZ_CP007456.1	1447716	Bifidobacterium kashiwanohense PV20-2	2370978	1534	0	0	0	0	0	0	0	0	0	0	0	0	0	0
NZ_AP013356.1	1391727	Helicobacter pylori 26695-1CL	1667239	1045	0	0	0	0	0	0	0	0	0	0	0	0	0	0
NC_014363.1	633147	Olsenella uli DSM 7084	2051896	1325	0	0	0	0	0	0	0	0	0	1	0	0	0	0
NZ_CP011101.1	1628753	Bacillus sp. LM 4-2	4069266	2586	0	0	0	0	0	0	0	0	0	0	0	0	0	0
NZ_CP003409.1	1157947	Thermotoga sp. Cell2	1749904	1097	1	1	0	0	0	0	0	0	1	0	1	0	0	0
NZ_CP009530.1	1434106	Methanosarcina barkeri 227	4487566	2967	1	1	0	0	0	1	0	0	0	1	1	0	0	0
NZ_CP011265.1	1637999	Verrucomicrobia bacterium IMCC26134	4001000	0	0	0	0	0	0	0	0	0	0	0	0	0	0	0
NZ_CP011443.1	520	Bordetella pertussis	4104305	2673	3	3	0	0	0	2	1	0	0	0	3	0	0	0
NC_017154.1	637382	Yersinia pestis D106004	4812922	3056	6	5	0	0	0	1	4	0	0	0	5	0	0	0
NC_007354.1	269484	Ehrlichia canis str. Jake	1315030	865	1	1	0	0	0	1	0	0	0	0	1	0	0	0
NC_002971.3	227377	Coxiella burnetii RSA 493	2032674	1361	2	2	0	0	0	2	0	0	0	0	2	0	0	0
NC_014532.1	768066	Halomonas elongata DSM 2581	4061296	2556	4	4	0	0	0	4	0	0	0	0	0	0	0	0
NZ_CP004870.1	1261129	Bacillus thuringiensis serovar kurstaki str. HD-1	6766594	4203	6	5	0	0	0	1	3	0	1	0	5	0	0	0
NC_017358.1	765964	Helicobacter pylori Cuz20	1635449	1020	3	3	0	0	0	3	0	0	0	0	3	0	0	0
NZ_CP013119.1	511	Alcaligenes faecalis	4248684	2695	3	2	1	0	0	2	1	0	0	1	2	1	0	0
NZ_CP010543.1	1263757	Mycoplasma pneumoniae 54524	816583	480	0	0	0	0	0	0	0	0	0	0	0	0	0	0
NZ_CP010103.1	119856	Francisella tularensis subsp. tularensis	2047033	1272	1	1	0	0	0	1	0	0	0	0	1	0	0	0
NZ_CP009162.1	1439852	Burkholderia pseudomallei K42	7296458	4702	3	2	0	0	0	0	2	0	0	0	3	0	0	0
NC_015385.1	869209	Treponema succinifaciens DSM 2489	2897425	1842	1	1	0	0	0	1	0	0	0	0	0	0	0	0
NC_008536.1	234267	Candidatus Solibacter usitatus Ellin6076	9965640	6435	5	5	0	0	0	5	0	0	0	1	5	0	0	0
NC_017100.1	634453	Acetobacter pasteurianus IFO 3283-03	3339669	2170	0	0	0	0	0	0	0	0	0	0	0	0	0	0
NZ_CP006738.1	1392500	Klebsiella pneumoniae HK787	5329385	3430	7	5	2	0	0	5	2	0	0	0	4	1	0	0
NC_020559.1	652616	Mycobacterium tuberculosis str. Erdman = ATCC 35801	4392353	2829	5	5	0	0	0	0	5	0	0	0	5	0	0	0
NZ_CP008846.1	1392	Bacillus anthracis	5490124	3481	1	1	0	0	0	0	1	0	0	0	1	0	0	0
NZ_CP010520.1	1491	Clostridium botulinum	3611897	2370	1	1	0	0	0	1	0	0	0	0	0	0	0	0
NZ_CP011078.1	29486	Yersinia ruckeri	3699725	2298	3	3	0	0	0	3	0	0	0	0	0	0	1	0
NZ_CP006821.1	1382921	Helicobacter pylori oki112	1637925	1054	4	4	0	0	0	4	0	0	0	0	4	0	0	0
NZ_CP007410.1	930166	Pseudomonas brassicacearum	6652396	4303	7	7	0	0	0	7	0	0	0	0	0	0	0	0
NC_013315.1	645462	Peptoclostridium difficile CD196	4110554	2693	1	1	0	0	0	1	0	0	0	0	0	0	0	0
NC_014562.1	712898	Pantoea vagans C9-1	4888338	3161	0	0	0	0	0	0	0	0	0	0	0	0	0	0
NC_017299.1	941968	Clostridium botulinum H04402 065	3919740	2550	6	5	0	0	0	4	1	0	0	0	4	0	0	0
NC_003272.1	103690	Nostoc sp. PCC 7120	7211789	4581	5	5	0	0	0	5	0	0	0	1	5	0	0	0
NZ_CP009616.1	36809	Mycobacterium abscessus	4687494	2989	4	4	0	0	0	4	0	0	0	0	4	0	0	0
NC_021362.1	766760	Bacillus paralicheniformis ATCC 9945a	4376305	2745	3	3	0	0	0	1	2	0	0	0	0	0	0	0
NC_007519.1	207559	Desulfovibrio alaskensis G20	3730232	2466	0	0	0	0	0	0	0	0	0	1	0	0	0	0
NZ_CP010407.1	362257	Streptomyces vietnamensis	9153777	5884	7	7	0	0	0	5	2	0	0	0	1	0	0	0
NZ_CP010440.1	83333	Escherichia coli K-12	4621164	3085	4	3	1	0	0	2	1	1	0	0	2	2	0	0
NC_020561.1	745310	Sphingomonas sp. MM-1	4633613	3009	3	3	0	0	0	3	0	0	0	0	0	0	0	0
NC_017038.1	1080228	Synechocystis sp. PCC 6803 substr. GT-I	3570004	2323	4	4	0	0	0	3	1	0	0	1	4	0	0	0
NZ_LN554884.1	1288	Staphylococcus xylosus	2786686	1764	3	3	0	0	0	3	0	0	0	0	0	0	0	0
NZ_CP010577.1	1441	Bacillus thuringiensis serovar morrisoni	6179896	3815	3	3	0	0	0	1	2	0	0	0	3	0	0	0
NC_011027.1	517417	Chlorobaculum parvum NCIB 8327	2289249	1480	2	2	0	0	0	2	0	0	0	1	2	0	0	0
NC_016622.1	862719	Azospirillum lipoferum 4B	6846400	4407	6	6	0	0	0	6	0	0	0	1	6	0	0	0
NC_011059.1	290512	Prosthecochloris aestuarii DSM 271	2579695	1664	5	5	0	0	0	5	0	0	0	1	5	0	0	0
NC_010175.1	324602	Chloroflexus aurantiacus J-10-fl	5258541	3362	8	8	0	0	0	0	8	0	0	1	8	0	0	0
NC_021883.1	1366053	Mannheimia haemolytica USMARC_2286	2658507	1665	2	2	0	0	0	2	0	0	0	0	2	0	0	0
NZ_CP009743.1	488447	Burkholderia contaminans	8509249	5539	8	8	0	0	0	7	1	0	0	0	8	0	0	0
NC_011660.1	552536	Listeria monocytogenes HCC23	2976212	2004	1	1	0	0	0	1	0	0	0	0	1	0	0	0
NZ_CP007653.1	666	Vibrio cholerae	5000494	3178	2	2	0	0	0	2	0	0	0	1	2	0	0	0
NC_008542.1	331272	Burkholderia cenocepacia HI2424	7702840	4847	3	3	0	0	0	2	0	1	0	0	1	0	1	0
NC_022040.1	1310161	Corynebacterium glutamicum MB001	3079253	1959	2	2	0	0	0	1	1	0	0	0	2	0	0	0
NZ_CP009854.1	550	Enterobacter cloacae	4927441	3232	4	4	0	0	0	4	0	0	0	0	4	0	0	0
NC_021824.1	1639	Listeria monocytogenes	2943218	1868	1	1	0	0	0	1	0	0	0	0	1	0	0	0
NC_019791.1	1056495	Caldisphaera lagunensis DSM 15908	1546846	1012	2	2	0	0	0	2	0	0	0	1	2	0	0	0
NZ_CP007684.1	1639	Listeria monocytogenes	2907486	1815	4	4	0	0	0	3	0	1	0	0	4	0	0	0
NC_007622.1	273036	Staphylococcus aureus RF122	2742531	1795	1	1	0	0	0	1	0	0	0	0	1	0	0	0
NC_009495.1	413999	Clostridium botulinum A str. ATCC 3502	3903260	2386	3	3	0	0	0	3	0	0	0	0	3	0	0	0
NZ_CP010905.1	272563	Peptoclostridium difficile 630	4274806	2749	4	4	0	0	0	4	0	0	0	1	4	0	0	0
NC_017619.1	1005041	Streptococcus suis SS12	2096866	1323	0	0	0	0	0	0	0	0	0	0	0	0	0	0
NZ_CP007211.1	1454592	Salmonella enterica subsp. enterica serovar Anatum str. CDC 06-0532	4667736	2959	4	3	0	0	0	3	0	0	0	0	4	0	0	0
NC_004432.1	272633	Mycoplasma penetrans HF-2	1358633	879	1	1	0	0	0	1	0	0	0	0	0	0	0	0
NC_020195.1	1072467	Blattabacterium sp. (Blatta orientalis) str. Tarazona	638184	419	0	0	0	0	0	0	0	0	0	0	0	0	0	0
NC_019978.1	748449	Halobacteroides halobius DSM 5150	2649255	1666	0	0	0	0	0	0	0	0	0	1	0	0	0	0
NC_015702.1	765952	Parachlamydia acanthamoebae UV-7	3072383	1854	3	3	0	0	0	3	0	0	0	1	3	0	0	0
NC_013853.1	365659	Streptococcus mitis B6	2146611	1424	1	1	0	0	0	1	0	0	0	0	0	0	0	0
NZ_CP008781.1	28450	Burkholderia pseudomallei	7085397	4640	4	3	0	0	0	1	2	0	0	0	4	0	0	0
NC_019814.1	1208923	Candidatus Kinetoplastibacterium blastocrithidii (ex Strigomonas culicis)	820037	541	0	0	0	0	0	0	0	0	0	0	0	0	0	0
NZ_CP010113.1	1770	Mycobacterium avium subsp. paratuberculosis	4781002	2989	4	4	0	0	0	4	0	0	0	0	4	0	0	0
NC_015514.1	590998	Cellulomonas fimi ATCC 484	4266344	2777	6	6	0	0	0	6	0	0	0	1	6	0	0	0
NZ_HG813242.1	1449752	Staphylococcus epidermidis PM221	2597508	1635	1	1	0	0	0	1	0	0	0	0	1	0	0	0
NC_019427.1	46234	Anabaena sp. 90	5305675	3317	3	3	0	0	0	3	0	0	0	1	3	0	0	0
NC_022795.1	1123384	Pseudothermotoga hypogea DSM 11164 = NBRC 106472	2165165	1416	0	0	0	0	0	0	0	0	0	0	0	0	0	0
NC_014932.1	696125	Bartonella clarridgeiae 73	1522743	945	1	1	0	0	0	1	0	0	0	0	0	0	0	0
NZ_CP007444.1	1379159	Dyella jiangningensis	5396991	3423	1	1	0	0	0	1	0	0	0	1	1	0	0	0
NC_004842.2	234826	Anaplasma marginale str. St. Maries	1197687	772	2	2	0	0	0	2	0	0	0	0	0	0	0	0
NC_005966.1	62977	Acinetobacter sp. ADP1	3598621	2415	1	1	0	0	0	1	0	0	0	0	0	0	0	0
NC_016901.1	693973	Shewanella baltica OS678	5368767	3373	2	2	0	0	0	2	0	0	0	0	1	0	0	0
NC_018408.1	1159199	Mycoplasma gallisepticum NC96_1596-4-2P	986257	647	0	0	0	0	0	0	0	0	0	0	0	0	0	0
NZ_CP011477.1	1620392	Spongiibacter sp. IMCC21906	3481669	2210	0	0	0	0	0	0	0	0	0	1	0	0	0	0
NC_011229.1	412419	Borrelia duttonii Ly	1574881	987	2	2	0	0	0	1	1	0	0	0	1	0	0	0
NZ_CP012622.1	362837	Spiroplasma cantharicola	1179577	735	0	0	0	0	0	0	0	0	0	0	0	0	0	0
NZ_FO538765.1	1288970	Magnetospira sp. QH-2	4052370	2652	0	0	0	0	0	0	0	0	0	1	0	0	0	0
NC_019702.1	1173263	Synechococcus sp. PCC 7502	3583735	2292	2	1	0	0	0	1	0	0	0	1	1	0	0	0
NZ_CP009544.1	1392	Bacillus anthracis	5491185	3529	2	2	0	0	0	0	1	0	1	0	2	0	0	0
NC_017345.1	548473	Staphylococcus aureus subsp. aureus TCH60	2827166	1894	3	2	0	0	0	2	0	0	0	0	2	0	0	0
NZ_CP007499.1	1280	Staphylococcus aureus	2988052	1860	1	1	0	0	0	1	0	0	0	0	1	0	0	0
NC_011740.1	585054	Escherichia fergusonii ATCC 35469	4643861	2919	3	1	1	0	0	1	1	0	0	0	0	2	0	0
NZ_CP011077.1	1134687	Klebsiella michiganensis	5107633	3269	1	1	0	0	0	1	0	0	0	0	0	0	1	0
NZ_CP007053.1	794903	Opitutaceae bacterium TAV5	7417673	0	0	0	0	0	0	0	0	0	0	0	0	0	0	0
NC_014655.1	649349	Leadbetterella byssophila DSM 17132	4059653	2615	2	2	0	0	0	2	0	0	0	1	2	0	0	0
NZ_CP009110.1	1068978	Amycolatopsis methanolica 239	7237391	4662	2	2	0	0	0	2	0	0	0	1	2	0	0	0
NC_003923.1	196620	Staphylococcus aureus subsp. aureus MW2	2820462	1751	3	3	0	0	0	3	0	0	0	0	3	0	0	0
NZ_CP007421.1	1412463	Salmonella enterica subsp. enterica serovar Enteritidis str. EC20090884	4760449	3138	2	2	0	0	0	2	0	0	0	0	2	0	0	0
NC_009033.1	399550	Staphylothermus marinus F1	1570485	1029	4	4	0	0	0	4	0	0	0	1	4	0	0	0
NZ_LM995445.1	40480	Mycoplasma capricolum subsp. capripneumoniae	1017293	647	0	0	0	0	0	0	0	0	0	0	0	0	0	0
NC_016826.1	1069533	Streptococcus infantarius subsp. infantarius CJ18	2008249	1327	0	0	0	0	0	0	0	0	0	0	0	0	0	0
NC_016043.1	1008459	Taylorella asinigenitalis MCE3	1638559	1027	0	0	0	0	0	0	0	0	0	1	0	0	0	0
NC_017347.1	1006543	Staphylococcus aureus subsp. aureus T0131	2913900	1914	3	3	0	0	0	3	0	0	0	0	3	0	0	0
NZ_LN680001.1	1409	Bacillus sp.	4233615	2726	2	2	0	0	0	0	2	0	0	0	2	0	0	0
NC_017635.1	566546	Escherichia coli W	5008864	3186	2	0	2	0	0	0	2	0	0	0	0	2	0	0
NZ_CP008878.1	96345	Flavobacterium psychrophilum	2698020	1782	0	0	0	0	0	0	0	0	0	0	0	0	0	0
NZ_CP011965.1	1679	Bifidobacterium longum subsp. longum	2458004	1650	1	1	0	0	0	1	0	0	0	0	1	0	0	0
NC_007434.1	320372	Burkholderia pseudomallei 1710b	7308054	4801	2	2	0	0	0	0	1	0	0	0	2	0	0	0
NZ_CP009013.1	611301	Xanthomonas citri subsp. citri	5223397	3299	4	4	0	0	0	0	4	0	0	0	4	0	0	0
NZ_CP010058.1	32022	Campylobacter jejuni subsp. jejuni	1712361	1078	0	0	0	0	0	0	0	0	0	0	0	0	0	0
NZ_CP006933.1	2162	Methanobacterium formicicum	2449987	1495	0	0	0	0	0	0	0	0	0	1	0	0	0	0
NC_009613.3	402612	Flavobacterium psychrophilum JIP02/86	2860382	1790	1	1	0	0	0	1	0	0	0	0	1	0	0	0
NZ_LN829118.1	1608628	Candidatus Filomicrobium marinum	3969941	2525	2	2	0	0	0	2	0	0	0	1	2	0	0	0
NC_007296.1	319701	Streptococcus pyogenes MGAS6180	1897573	1253	1	1	0	0	0	1	0	0	0	0	1	0	0	0
NC_002939.5	243231	Geobacter sulfurreducens PCA	3814128	2564	2	2	0	0	0	2	0	0	0	0	0	0	0	0
NZ_CP011412.1	1543721	Sedimenticola sp. SIP-G1	3962284	2499	4	4	0	0	0	4	0	0	0	1	4	0	0	0
NC_017449.1	676032	Francisella cf. tularensis subsp. novicida 3523	1945310	1225	0	0	0	0	0	0	0	0	0	0	0	0	0	0
NC_016816.1	1123863	Pantoea ananatis LMG 5342	4908144	3143	5	5	0	0	0	5	0	0	0	0	5	0	0	0
NZ_CP009796.1	1423	Bacillus subtilis	4079669	2596	4	4	0	0	0	0	4	0	0	0	4	0	0	0
NC_017445.1	215689	Erwinia sp. Ejp617	3957675	2532	1	1	0	0	0	1	0	0	0	0	1	0	0	0
NC_011741.1	585034	Escherichia coli IAI1	4700560	2983	2	0	2	0	0	0	2	0	0	0	0	2	0	0
NC_021191.1	649831	Actinoplanes sp. N902-109	9228054	5958	9	9	0	0	0	9	0	0	0	0	0	0	1	0
NC_015222.1	153948	Nitrosomonas sp. AL212	3337023	2184	1	1	0	0	0	1	0	0	0	0	0	0	0	0
NZ_CP011321.1	562	Escherichia coli	4610881	2912	4	2	1	0	0	2	1	0	0	0	2	2	0	0
NZ_CP007475.1	1249652	Ehrlichia chaffeensis str. Jax	1176890	717	2	2	0	0	0	2	0	0	0	0	2	0	0	0
NZ_CP010439.1	83333	Escherichia coli K-12	4604543	2931	4	1	2	1	0	1	2	1	0	0	2	2	0	0
NC_008541.1	290399	Arthrobacter sp. FB24	5070478	3222	3	3	0	0	0	3	0	0	0	1	3	0	0	0
NC_013174.1	471856	Jonesia denitrificans DSM 20603	2749646	1829	4	4	0	0	0	4	0	0	0	1	4	0	0	0
NC_010658.1	344609	Shigella boydii CDC 3083-94	4874659	3082	3	0	3	0	0	0	2	0	1	1	1	2	0	0
NZ_CP012044.1	1132508	Mycobacterium abscessus UC22	5257136	3371	2	2	0	0	0	2	0	0	0	0	2	0	0	0
NZ_CP010849.1	477245	Streptomyces cyaneogriseus subsp. noncyanogenus	7762396	4877	1	1	0	0	0	1	0	0	0	0	1	0	0	0
NZ_CP013202.1	1311	Streptococcus agalactiae	2165968	1418	4	4	0	0	0	4	0	0	0	0	4	0	0	0
NC_021848.1	1338032	Vibrio parahaemolyticus O1:K33 str. CDC_K4557	5138575	3266	2	2	0	0	0	2	0	0	0	0	2	0	0	0
NZ_HG916765.1	1437824	Castellaniella defragrans 65Phen	3952818	2483	5	5	0	0	0	5	0	0	0	1	5	0	0	0
NZ_CP006777.1	864803	Clostridium beijerinckii ATCC 35702	5999050	3870	6	6	0	0	0	4	2	0	0	0	1	0	0	0
NC_007880.1	376619	Francisella tularensis subsp. holarctica LVS	1895994	1198	1	1	0	0	0	1	0	0	0	0	1	0	0	0
NZ_CP011329.1	1311	Streptococcus agalactiae	2147416	1389	0	0	0	0	0	0	0	0	0	0	0	0	0	0
NZ_HG813240.1	1427516	Mycobacterium tuberculosis 49-02	4412379	2747	2	2	0	0	0	0	2	0	0	0	2	0	0	0
NZ_CP010569.1	813	Chlamydia trachomatis	1050553	676	0	0	0	0	0	0	0	0	0	0	0	0	0	0
NC_022759.1	1244528	Campylobacter fetus subsp. testudinum 03-427	1775480	1098	0	0	0	0	0	0	0	0	0	0	0	0	0	0
NZ_CP007533.1	1194154	Salmonella enterica subsp. enterica serovar Bredeney str. CFSAN001080	4603849	3051	2	2	0	0	0	2	0	0	0	0	2	0	0	0
NZ_CP008874.1	1604004	Halanaeroarchaeum sulfurireducens	2209738	1373	2	2	0	0	0	2	0	0	0	1	2	0	0	0
NC_010498.1	439855	Escherichia coli SMS-3-5	5215377	3359	0	0	0	0	0	0	0	0	0	0	0	0	0	0
NC_016024.1	981222	Chloracidobacterium thermophilum B	3695372	2353	8	6	0	0	0	6	0	0	0	1	6	0	0	0
NZ_CP012076.1	103855	Bordetella hinzii	4912977	3057	2	2	0	0	0	2	0	0	0	0	0	0	0	0
NC_008278.1	326424	Frankia alni ACN14a	7497934	4793	1	1	0	0	0	1	0	0	0	1	1	0	0	0
NZ_CP012690.1	32022	Campylobacter jejuni subsp. jejuni	1664566	1027	0	0	0	0	0	0	0	0	0	0	0	0	0	0
NC_003869.1	273068	Caldanaerobacter subterraneus subsp. tengcongensis MB4	2689445	1751	0	0	0	0	0	0	0	0	0	1	0	0	0	0
NC_009848.1	315750	Bacillus pumilus SAFR-032	3704465	2389	3	3	0	0	0	3	0	0	0	0	1	0	0	0
NZ_CP012192.1	1678678	Burkholderia sp. HB1	7206167	4598	5	5	0	0	0	4	0	0	0	0	2	0	0	0
NC_020815.1	1137651	Xanthomonas citri subsp. citri Aw12879	5398685	3469	3	3	0	0	0	0	3	0	0	0	3	0	0	0
NC_015697.1	491077	Lactobacillus reuteri SD2112	2316838	1532	1	1	0	0	0	1	0	0	0	0	0	0	0	0
NZ_CP006890.1	1423138	Bacillus methylotrophicus SQR9	4117023	2645	6	6	0	0	0	0	6	0	0	0	5	0	0	0
NZ_CP006580.1	1354030	Enterobacter cloacae P101	5369929	3495	2	2	0	0	0	2	0	0	0	1	2	0	0	0
NC_022117.1	813	Chlamydia trachomatis	1042588	720	1	1	0	0	0	1	0	0	0	0	1	0	0	0
NZ_CP010892.1	1611770	Pseudomonas sp. MRSN12121	6986763	4496	3	3	0	0	0	1	1	0	0	0	2	0	0	0
NC_018641.1	1215914	Lactobacillus casei W56	3132096	2009	5	5	0	0	0	1	3	1	0	0	5	0	0	0
NC_012622.1	439386	Sulfolobus islandicus Y.G.57.14	2702058	1686	3	3	0	0	0	2	1	0	0	0	3	0	0	0
NZ_HG326223.1	273526	Serratia marcescens subsp. marcescens Db11	5113802	3226	3	3	0	0	0	2	1	0	0	0	1	0	0	1
NC_011586.1	480119	Acinetobacter baumannii AB0057	4059242	2521	4	3	0	0	0	3	0	0	0	0	3	0	0	0
NZ_CP010811.1	666	Vibrio cholerae	3928357	2515	0	0	0	0	0	0	0	0	0	0	0	0	0	0
NC_007484.1	323261	Nitrosococcus oceani ATCC 19707	3522111	2146	3	3	0	0	0	3	0	0	0	1	3	0	0	0
NC_016788.1	698970	Corynebacterium diphtheriae HC04	2484332	1583	0	0	0	0	0	0	0	0	0	0	0	0	0	0
NZ_AP013072.1	1353243	Streptococcus anginosus subsp. whileyi MAS624	2122284	1345	2	2	0	0	0	2	0	0	0	0	2	0	0	0
NZ_CP009279.1	1536775	Paenibacillus sp. FSL H7-0737	6765883	4281	6	6	0	0	0	6	0	0	0	0	3	0	0	0
NC_014329.1	765874	Corynebacterium pseudotuberculosis FRC41	2337913	1463	3	3	0	0	0	3	0	0	0	0	3	0	0	0
NZ_CP012608.1	1646498	Acinetobacter sp. TTH0-4	2962453	1913	2	2	0	0	0	2	0	0	0	0	0	0	0	0
NC_014008.1	583355	Coraliomargarita akajimensis DSM 45221	3750771	2517	2	2	0	0	0	2	0	0	0	1	2	0	0	0
NC_015690.1	1036673	Paenibacillus mucilaginosus KNP414	8663821	5605	6	6	0	0	0	6	0	0	0	0	0	0	0	0
NC_017515.1	935593	Neisseria meningitidis M04-240196	2250449	1447	2	2	0	0	0	2	0	0	0	0	2	0	0	0
NZ_CP008776.1	1314	Streptococcus pyogenes	1829516	1206	3	3	0	0	0	2	1	0	0	0	3	0	0	0
NZ_CP007722.1	1718	Corynebacterium glutamicum	3192886	2053	0	0	0	0	0	0	0	0	0	0	0	0	0	0
NC_018497.1	662945	Mycoplasma genitalium M6320	579796	384	0	0	0	0	0	0	0	0	0	0	0	0	0	0
NC_015634.1	941639	Bacillus coagulans 2-6	3073079	1902	4	4	0	0	0	4	0	0	0	0	4	0	0	0
NC_021354.1	1313290	Erysipelothrix rhusiopathiae SY1027	1752910	1089	1	1	0	0	0	1	0	0	0	1	1	0	0	0
NZ_CP007686.1	1639	Listeria monocytogenes	2932501	1876	1	1	0	0	0	1	0	0	0	1	1	0	0	0
NZ_CP012897.1	1532555	Brevundimonas sp. DS20	3475610	2196	2	2	0	0	0	2	0	0	0	1	2	0	0	0
NZ_LN890520.1	57743	Salmonella enterica subsp. enterica serovar Weltevreden	5228621	3315	6	6	0	0	0	6	0	0	0	0	5	0	0	0
NC_017187.1	944546	Arcobacter butzleri ED-1	2256675	1427	0	0	0	0	0	0	0	0	0	0	0	0	0	0
NC_009718.1	381764	Fervidobacterium nodosum Rt17-B1	1948941	1254	2	1	0	0	0	1	0	0	0	1	1	0	0	0
NC_006448.1	264199	Streptococcus thermophilus LMG 18311	1796846	1195	1	1	0	0	0	1	0	0	0	0	1	0	0	0
NZ_CP006809.1	1403312	Lactobacillus gasseri 130918	1955817	1304	2	2	0	0	0	2	0	0	0	0	0	0	0	0
NC_009439.1	399739	Pseudomonas mendocina ymp	5072807	3263	5	5	0	0	0	5	0	0	0	0	0	0	0	0
NC_018693.1	1195464	Bacillus thuringiensis MC28	6694533	4232	2	1	0	0	0	1	0	0	0	0	1	0	0	0
NZ_CP012174.1	43687	Metallosphaera sedula	2191531	1410	2	2	0	0	0	2	0	0	0	0	2	0	0	0
NC_022364.1	1335916	Escherichia coli LY180	4835601	3012	3	0	2	0	0	0	2	0	0	0	0	2	0	0
NC_018650.1	1134782	Escherichia coli O104:H4 str. 2009EL-2050	5438174	3541	2	1	1	0	0	1	1	0	0	0	1	0	1	0
NC_017545.1	393130	Listeria monocytogenes J0161	3000464	1961	2	2	0	0	0	2	0	0	0	1	2	0	0	0
NC_018706.1	1100841	Acinetobacter baumannii TYTH-1	3957368	2439	2	2	0	0	0	2	0	0	0	1	2	0	0	0
NC_013510.1	471852	Thermomonospora curvata DSM 43183	5639016	3615	4	4	0	0	0	4	0	0	0	1	4	0	0	0
NC_022648.1	1355100	Escherichia coli JJ1886	5308284	3311	1	0	1	0	0	0	1	0	0	0	0	1	0	0
NC_022236.1	696216	Streptococcus constellatus subsp. pharyngis C232	1935414	1228	0	0	0	0	0	0	0	0	0	0	0	0	0	0
NC_015958.1	697303	Thermoanaerobacter wiegelii Rt8.B1	2785056	1866	1	1	0	0	0	1	0	0	0	0	1	0	0	0
NC_022660.1	1358410	Campylobacter coli 15-537360	1685020	1094	0	0	0	0	0	0	0	0	0	0	0	0	0	0
NC_014729.1	469382	Halogeometricum borinquense DSM 11551	3944467	2618	6	6	0	0	0	6	0	0	0	1	6	0	0	0
NZ_CP011624.1	573	Klebsiella pneumoniae	5810009	3674	3	3	0	0	0	3	0	0	0	0	3	0	0	0
NZ_CP009789.1	83333	Escherichia coli K-12	4558660	2898	1	0	0	0	0	0	0	0	0	0	0	1	0	0
NC_020211.1	435998	Serratia marcescens WW4	5244703	3420	2	2	0	0	0	1	1	0	0	0	0	0	1	0
NZ_CP009215.1	401472	Corynebacterium ureicelerivorans	2328278	1472	2	2	0	0	0	2	0	0	0	0	0	0	0	0
NZ_CP007512.1	1330043	Bacillus bombysepticus str. Wang	5873592	3601	3	3	0	0	0	1	1	1	0	0	2	0	0	0
NC_018524.1	1205910	Nocardiopsis alba ATCC BAA-2165	5848211	3740	6	6	0	0	0	6	0	0	0	1	6	0	0	0
NZ_CP007697.1	645170	Brucella suis bv. 2	3328972	2146	1	1	0	0	0	0	0	0	0	0	1	0	0	0
NC_009004.1	416870	Lactococcus lactis subsp. cremoris MG1363	2529478	1659	2	2	0	0	0	2	0	0	0	1	2	0	0	0
NZ_CP007210.1	1457188	Listeria monocytogenes WSLC1042	2942168	1871	2	2	0	0	0	2	0	0	0	0	2	0	0	0
NC_018678.1	1004788	Alteromonas macleodii str. 'English Channel 673'	4601785	2956	3	3	0	0	0	3	0	0	0	0	0	0	0	0
NC_017058.1	1105110	Rickettsia australis str. Cutlack	1323280	860	1	1	0	0	0	1	0	0	0	0	1	0	0	0
NZ_CP011787.1	186490	Candidatus Baumannia cicadellinicola	636137	0	0	0	0	0	0	0	0	0	0	0	0	0	0	0
NC_020526.1	1246365	Streptococcus suis SC070731	2138568	1387	1	1	0	0	0	1	0	0	0	0	1	0	0	0
NC_017554.1	1095774	Pantoea ananatis PA13	4867131	3173	5	5	0	0	0	5	0	0	0	1	5	0	0	0
NZ_CP011130.1	435897	Lysobacter capsici	6391889	3986	4	4	0	0	0	4	0	0	0	1	4	0	0	0
NZ_CP007154.1	743966	Mycoplasma bovoculi M165/69	760240	471	1	1	0	0	0	1	0	0	0	0	0	0	0	0
NC_022221.1	1225522	Salmonella enterica subsp. enterica serovar Gallinarum/pullorum str. CDC1983-67	4623089	2983	3	3	0	0	0	3	0	0	0	0	3	0	0	0
NC_003485.1	186103	Streptococcus pyogenes MGAS8232	1895017	1202	2	2	0	0	0	1	1	0	0	0	2	0	0	0
NZ_AP013357.1	1401639	Acinetobacter baumannii NCGM 237	4021920	2576	3	3	0	0	0	3	0	0	0	0	3	0	0	0
NC_010003.1	403833	Petrotoga mobilis SJ95	2169548	1434	3	3	0	0	0	3	0	0	0	1	3	0	0	0
NZ_CP012150.1	134601	Mycobacterium goodii	7105933	4546	6	6	0	0	0	6	0	0	0	0	2	0	0	0
NZ_CP010048.1	1505596	Blochmannia endosymbiont of Polyrhachis (Hedomyrma) turneri	749321	502	0	0	0	0	0	0	0	0	0	0	0	0	0	0
NC_013768.1	637381	Listeria monocytogenes 08-5923	2999054	1945	5	4	0	0	0	4	0	0	0	0	3	0	0	0
NZ_CP009440.1	28110	Francisella philomiragia	2152054	1316	1	1	0	0	0	1	0	0	0	0	0	0	0	0
NC_016829.1	1129369	Mycoplasma hyorhinis GDL-1	837480	549	3	3	0	0	0	3	0	0	0	0	3	0	0	0
NZ_CP011366.1	407035	Salinicoccus halodurans	2778379	1707	3	3	0	0	0	3	0	0	0	1	3	0	0	0
NC_015431.1	862259	Mycoplasma mycoides subsp. capri LC str. 95010	1155838	716	1	1	0	0	0	1	0	0	0	0	0	0	0	0
NZ_CP012259.1	1159491	Cronobacter malonaticus LMG 23826	4404725	2756	3	3	0	0	0	0	3	0	0	1	3	0	0	0
NC_008025.1	319795	Deinococcus geothermalis DSM 11300	3247018	2034	4	4	0	0	0	4	0	0	0	0	0	0	0	0
NC_009481.1	32051	Synechococcus sp. WH 7803	2366980	1488	0	0	0	0	0	0	0	0	0	0	0	0	0	0
NZ_CP009226.1	1507806	Campylobacter fetus subsp. testudinum	1776391	1069	0	0	0	0	0	0	0	0	0	0	0	0	0	0
NZ_CP008730.1	87883	Burkholderia multivorans	7281867	4656	8	8	0	0	0	7	1	0	0	0	4	0	0	0
NZ_CP012371.1	1266925	Nitrosospira briensis C-128	3210113	2062	4	4	0	0	0	4	0	0	0	1	4	0	0	0
NZ_AASL01000001.1	354242	Campylobacter jejuni subsp. jejuni 81-176	1616175	1039	0	0	0	0	0	0	0	0	0	0	0	0	0	0
NC_016629.1	690850	Desulfovibrio africanus str. Walvis Bay	4200534	2670	3	3	0	0	0	3	0	0	0	0	0	0	0	0
NC_017243.1	1045858	Brachyspira intermedia PWS/A	3308048	2119	1	0	0	0	0	0	0	0	0	1	0	0	0	0
NZ_CP011568.1	445709	Pandoraea thiooxydans	4484974	2789	4	4	0	0	0	4	0	0	0	1	4	0	0	0
NZ_CP011975.1	263819	Yersinia aleksiciae	4000307	2627	1	1	0	0	0	1	0	0	0	1	1	0	0	0
NC_003228.3	272559	Bacteroides fragilis NCTC 9343	5241700	3340	5	5	0	0	0	5	0	0	0	0	5	0	0	0
NC_010544.1	59748	Candidatus Phytoplasma australiense	879959	560	2	2	0	0	0	2	0	0	0	1	2	0	0	0
NC_022663.1	557599	Mycobacterium kansasii ATCC 12478	6577228	4199	3	3	0	0	0	3	0	0	0	0	0	0	0	0
NC_021833.1	1276221	Spiroplasma diminutum CUAS-1	945296	607	0	0	0	0	0	0	0	0	0	0	0	0	0	0
NZ_CP009208.1	72407	Klebsiella pneumoniae subsp. pneumoniae	5374834	3461	3	3	0	0	0	3	0	0	0	0	3	0	0	0
NC_010263.3	452659	Rickettsia rickettsii str. Iowa	1268201	779	1	1	0	0	0	0	0	0	0	0	1	0	0	0
NZ_CP012679.1	287	Pseudomonas aeruginosa	6500439	4197	6	6	0	0	0	6	0	0	0	0	6	0	0	0
NZ_CP007235.1	1454639	Salmonella enterica subsp. enterica serovar Typhimurium str. USDA-ARS-USMARC-1899	4856450	3101	4	4	0	0	0	4	0	0	0	0	4	0	0	0
NZ_CP007790.1	1224162	Corynebacterium marinum DSM 44953	2729219	1799	1	1	0	0	0	1	0	0	0	0	0	0	0	0
NZ_CP009481.1	1299326	Mycobacterium kansasii 662	6383492	4162	5	4	1	0	0	4	0	0	0	0	0	0	0	1
NC_012850.1	395491	Rhizobium leguminosarum bv. trifolii WSM1325	7418122	4675	6	5	0	0	0	5	0	0	0	0	1	1	0	0
NC_021740.1	1306414	Mycobacterium tuberculosis EAI5	4391174	2736	5	5	0	0	0	0	5	0	0	0	5	0	0	0
NC_018712.1	617121	Streptococcus dysgalactiae subsp. equisimilis RE378	2151145	1357	1	1	0	0	0	0	1	0	0	0	1	0	0	0
NC_000964.3	224308	Bacillus subtilis subsp. subtilis str. 168	4215606	2764	3	3	0	0	0	0	3	0	0	0	3	0	0	0
NZ_CP007322.1	1412461	Salmonella enterica subsp. enterica serovar Enteritidis str. EC20090332	4785193	3037	2	2	0	0	0	2	0	0	0	0	2	0	0	0
NC_022576.1	946483	Candidatus Symbiobacter mobilis CR	2991840	1908	0	0	0	0	0	0	0	0	0	1	0	0	0	0
NZ_CP009058.1	411555	Borrelia afzelii K78	1309078	841	0	0	0	0	0	0	0	0	0	0	0	0	0	0
NZ_CP007755.1	28025	Bifidobacterium animalis	1931057	1236	0	0	0	0	0	0	0	0	0	0	0	0	0	0
NC_018513.1	1009846	Burkholderia cepacia GG4	6467321	4085	4	4	0	0	0	3	0	1	0	0	4	0	0	0
NZ_CP007674.1	1280	Staphylococcus aureus	2864278	1720	2	2	0	0	0	2	0	0	0	0	2	0	0	0
NC_022111.1	575614	Prevotella sp. oral taxon 299 str. F0039	2480269	1621	1	1	0	0	0	1	0	0	0	0	0	0	0	0
NZ_CP012830.1	294	Pseudomonas fluorescens	6391871	4097	4	4	0	0	0	4	0	0	0	0	1	0	0	0
NC_018592.1	882096	Listeria monocytogenes SLCC5850	2907142	1828	0	0	0	0	0	0	0	0	0	0	0	0	0	0
NC_017359.1	794851	Helicobacter pylori Sat464	1567570	1015	1	1	0	0	0	1	0	0	0	0	1	0	0	0
NC_017579.1	693970	Shewanella baltica OS117	5526018	3564	7	7	0	0	0	6	1	0	0	0	5	0	0	0
NC_019393.1	1004786	Alteromonas macleodii AltDE1	4947126	3115	1	0	0	0	0	0	0	0	0	0	0	0	0	0
NC_016148.1	580340	Thermovirga lienii DSM 17291	1999646	1301	3	3	0	0	0	3	0	0	0	1	3	0	0	0
NZ_CP009282.1	1536771	Paenibacillus sp. FSL R5-0912	7718525	4962	3	3	0	0	0	3	0	0	0	0	0	0	0	0
NC_022438.1	1389489	Leifsonia xyli subsp. cynodontis DSM 46306	2686418	1688	3	3	0	0	0	3	0	0	0	1	3	0	0	0
NZ_CP012362.1	1698446	Pseudomonadaceae bacterium D3318	2294397	0	0	0	0	0	0	0	0	0	0	0	0	0	0	0
NZ_CP009241.1	1536774	Paenibacillus sp. FSL H7-0357	7692748	4981	8	7	0	0	0	7	0	0	0	1	7	0	0	0
NZ_AP014584.1	38504	Ureaplasma parvum serovar 3	727289	444	1	1	0	0	0	1	0	0	0	1	1	0	0	0
NC_022369.1	1295826	Lactococcus lactis subsp. cremoris KW2	2427048	1547	2	2	0	0	0	2	0	0	0	1	2	0	0	0
NZ_CP010267.1	2103	Mycoplasma mycoides subsp. mycoides	1192498	792	1	1	0	0	0	1	0	0	0	0	0	0	0	0
NZ_CP009677.1	2098	Mycoplasma hominis	700851	406	0	0	0	0	0	0	0	0	0	0	0	0	0	0
NZ_CP011414.1	1150773	Streptococcus pyogenes JRS4	1811968	1188	0	0	0	0	0	0	0	0	0	0	0	0	0	0
NC_007759.1	56780	Syntrophus aciditrophicus SB	3179300	2031	2	2	0	0	0	2	0	0	0	1	2	0	0	0
NC_012559.1	557598	Laribacter hongkongensis HLHK9	3169329	2045	1	1	0	0	0	1	0	0	0	1	1	0	0	0
NZ_CP012945.1	1736675	Devosia sp. A16	5032994	3305	4	4	0	0	0	4	0	0	0	1	4	0	0	0
NZ_CP007567.1	1208104	Aeromonas media WS	4788430	3087	2	2	0	0	0	2	0	0	0	1	2	0	0	0
NC_010611.1	405416	Acinetobacter baumannii ACICU	3996761	2534	2	2	0	0	0	2	0	0	0	0	2	0	0	0
NC_015731.1	261292	Nitrosomonas sp. Is79A3	3783444	2389	3	3	0	0	0	3	0	0	0	1	3	0	0	0
NZ_CP012127.1	562	Escherichia coli	4609522	2976	5	1	4	0	0	1	4	0	0	0	4	1	0	0
NC_017953.1	1071763	Chlamydia trachomatis F/SW5	1042743	670	0	0	0	0	0	0	0	0	0	0	0	0	0	0
NC_008380.1	216596	Rhizobium leguminosarum bv. viciae 3841	7751309	4984	3	3	0	0	0	3	0	0	0	0	1	0	1	0
NC_017933.1	1138308	Cronobacter sakazakii ES15	4268675	2710	4	3	1	0	0	2	2	0	0	0	3	1	0	0
NZ_CP011057.1	2287	Sulfolobus solfataricus	2727337	1738	3	3	0	0	0	3	0	0	0	0	3	0	0	0
NZ_CP012689.1	32022	Campylobacter jejuni subsp. jejuni	1664565	1032	0	0	0	0	0	0	0	0	0	0	0	0	0	0
NC_021661.1	571800	Psychrobacter sp. G	3113999	1995	0	0	0	0	0	0	0	0	0	1	0	0	0	0
NC_022991.1	1406860	Salmonella enterica subsp. enterica serovar Agona str. 24249	4762840	3099	3	3	0	0	0	3	0	0	0	0	3	0	0	0
NZ_CP010431.1	93222	Pandoraea sputorum	5751958	3709	2	2	0	0	0	2	0	0	0	0	1	0	0	0
NC_021499.1	1245471	Pseudomonas resinovorans NBRC 106553	6484828	4219	1	1	0	0	0	0	1	0	0	0	0	0	0	0
NZ_AP014582.1	518	Bordetella bronchiseptica	5191712	3403	4	4	0	0	0	2	2	0	0	0	2	0	1	0
NC_013504.1	633699	Lactobacillus johnsonii FI9785	1785116	1188	2	2	0	0	0	2	0	0	0	0	0	0	0	0
NZ_CP008924.1	1719	Corynebacterium pseudotuberculosis	2338300	1516	0	0	0	0	0	0	0	0	0	0	0	0	0	0
NC_017196.2	645657	Bacillus subtilis subsp. natto BEST195	4111218	2570	2	2	0	0	0	0	1	1	0	0	1	0	0	0
NZ_CP009454.1	1076550	Pantoea rwandensis	4327607	2769	6	6	0	0	0	6	0	0	0	0	0	0	1	1
NC_015759.1	1045854	Weissella koreensis KACC 15510	1441470	917	1	1	0	0	0	1	0	0	0	1	1	0	0	0
NC_017295.1	863638	Clostridium acetobutylicum EA 2018	4132226	2698	3	3	0	0	0	3	0	0	0	0	3	0	0	0
NZ_CP009574.1	1547445	Francisella sp. FSC1006	2015987	1303	0	0	0	0	0	0	0	0	0	0	0	0	0	0
NC_019904.1	926556	Echinicola vietnamensis DSM 17526	5608040	3520	2	2	0	0	0	2	0	0	0	1	2	0	0	0
NZ_CP009535.1	441156	Burkholderia pseudomallei 7894	7381912	4722	6	6	0	0	0	3	1	2	0	0	5	0	0	0
NC_003198.1	220341	Salmonella enterica subsp. enterica serovar Typhi str. CT18	5133713	3282	1	0	1	0	0	0	1	0	0	0	0	0	1	0
NZ_LN515398.1	40480	Mycoplasma capricolum subsp. capripneumoniae	1016760	662	1	1	0	0	0	1	0	0	0	0	0	0	0	0
NZ_CP006905.1	1415775	Clostridium baratii str. Sullivan	3338630	2158	3	3	0	0	0	3	0	0	0	0	0	0	0	0
NZ_CP012576.1	28450	Burkholderia pseudomallei	7184677	4561	3	3	0	0	0	0	3	0	0	0	3	0	0	0
NZ_HG938355.1	1028801	Neorhizobium galegae bv. officinalis bv. officinalis str. HAMBI 1141	6413184	4128	4	4	0	0	0	4	0	0	0	1	4	0	0	0
NZ_CP008887.1	1505907	Thermococcus eurythermalis	2126164	1319	1	1	0	0	0	1	0	0	0	0	0	0	0	0
NC_017022.1	1155766	Enterococcus faecium Aus0004	3019780	1930	2	2	0	0	0	2	0	0	0	0	0	0	0	0
NZ_CP012746.1	1323664	Burkholderia caribensis MBA4	9482704	5900	8	8	0	0	0	7	1	0	0	0	0	0	1	0
NC_017221.1	1035817	Bifidobacterium longum subsp. longum KACC 91563	2395764	1548	4	3	0	0	0	2	1	0	0	0	4	0	0	0
NZ_CP010072.1	32022	Campylobacter jejuni subsp. jejuni	1827840	1186	0	0	0	0	0	0	0	0	0	0	0	0	0	0
NC_017079.1	926550	Caldilinea aerophila DSM 14535 = NBRC 104270	5144873	3181	4	4	0	0	0	4	0	0	0	1	4	0	0	0
NC_020126.1	1278073	Myxococcus stipitatus DSM 14675	10350586	6720	4	4	0	0	0	4	0	0	0	0	2	0	0	1
NC_004342.2	189518	Leptospira interrogans serovar Lai str. 56601	4698134	3036	1	1	0	0	0	1	0	0	0	1	1	0	0	0
NC_007614.1	323848	Nitrosospira multiformis ATCC 25196	3234309	2065	1	1	0	0	0	1	0	0	0	1	1	0	0	0
NZ_CP009312.1	1528099	Corynebacteriales bacterium X1036	1860551	0	0	0	0	0	0	0	0	0	0	0	0	0	0	0
NC_009381.1	386656	Yersinia pestis Pestoides F	4725862	2937	5	5	0	0	0	1	4	0	0	0	5	0	0	0
NC_015738.1	502558	Eggerthella sp. YY7918	3123671	1945	4	4	0	0	0	4	0	0	0	1	4	0	0	0
NC_016854.1	568708	Salmonella enterica subsp. enterica serovar Typhimurium str. D23580	4879400	3081	3	3	0	0	0	3	0	0	0	0	3	0	0	0
NZ_CP006999.1	1273266	Campylobacter fetus subsp. venerealis cfvi03/293	1996728	1322	2	2	0	0	0	2	0	0	0	0	2	0	0	0
NZ_LM651928.1	623	Shigella flexneri	4526576	2903	2	0	1	0	0	0	1	0	0	0	0	2	0	0
NZ_CP009577.1	202751	Listeria ivanovii subsp. ivanovii	2919548	1810	2	2	0	0	0	2	0	0	0	0	0	0	0	0
NC_014640.1	762376	Achromobacter xylosoxidans A8	7359146	4790	1	1	0	0	0	1	0	0	0	0	0	0	0	0
NZ_CP009045.1	302911	Bifidobacterium animalis subsp. lactis	1938624	1278	0	0	0	0	0	0	0	0	0	0	0	0	0	0
NC_022349.1	1219076	Vibrio alginolyticus NBRC 15630 = ATCC 17749	5146637	3279	6	6	0	0	0	5	1	0	0	0	2	0	0	0
NC_021003.1	869311	Streptococcus pneumoniae SPN032672	2131190	1333	2	2	0	0	0	1	1	0	0	0	2	0	0	0
NC_009513.1	557436	Lactobacillus reuteri DSM 20016	1999618	1246	2	2	0	0	0	2	0	0	0	0	0	0	0	0
NZ_CP011441.1	520	Bordetella pertussis	4105363	2621	3	3	0	0	0	0	2	0	1	0	3	0	0	0
NZ_CP007287.1	1687	Bifidobacterium coryneforme	1755151	1080	3	3	0	0	0	3	0	0	0	0	0	0	0	0
NZ_CP007774.1	580033	Campylobacter volucris LMG 24379	1517949	977	0	0	0	0	0	0	0	0	0	0	0	0	0	0
NC_009135.1	402880	Methanococcus maripaludis C5	1789046	1125	2	2	0	0	0	2	0	0	0	0	0	0	0	0
NC_018515.1	768704	Desulfosporosinus meridiei DSM 13257	4873567	3019	4	3	0	0	0	3	0	0	0	1	3	0	0	0
NZ_CP007539.1	1280	Staphylococcus aureus	2823087	1824	2	2	0	0	0	1	1	0	0	0	2	0	0	0
NZ_CP006751.1	1345707	Yersinia pestis 3770	4735667	2997	7	7	0	0	0	1	5	1	0	0	7	0	0	0
NZ_CP004001.1	1249468	Burkholderia pseudomallei NCTC 13178	7391364	4748	4	4	0	0	0	1	2	1	0	0	3	0	0	0
NC_008146.1	164756	Mycobacterium sp. MCS	5920523	3816	5	5	0	0	0	0	5	0	0	0	1	0	0	0
NZ_CP010279.1	796730	Salmonella enterica subsp. enterica serovar Newport str. CVM 22425	4832938	3093	1	1	0	0	0	1	0	0	0	0	1	0	0	0
NZ_CP009981.1	1392	Bacillus anthracis	5503972	3480	3	3	0	0	0	0	3	0	0	0	3	0	0	0
NZ_CP007758.1	36855	Brucella canis	3312751	2157	1	1	0	0	0	0	0	0	0	0	1	0	0	0
NC_014833.1	697329	Ruminococcus albus 7 = DSM 20455	4482087	2834	3	3	0	0	0	3	0	0	0	1	3	0	0	0
NC_018646.1	1203670	Streptococcus agalactiae GD201008-001	2063112	1314	0	0	0	0	0	0	0	0	0	0	0	0	0	0
NZ_CP011232.1	1330330	Kosmotoga pacifica	2169170	1385	0	0	0	0	0	0	0	0	0	1	0	0	0	0
NC_014920.1	866630	Haemophilus influenzae F3031	1985832	1186	1	1	0	0	0	1	0	0	0	1	1	0	0	0
NC_018828.1	1208660	Bordetella parapertussis Bpp5	4899574	3118	3	2	0	0	0	0	2	0	0	0	2	0	0	0
NZ_CP007034.1	880074	Barnesiella viscericola DSM 18177	3076856	2028	2	2	0	0	0	2	0	0	0	1	2	0	0	0
NZ_CP006649.1	1354240	Riemerella anatipestifer CH3	2234477	1420	1	1	0	0	0	1	0	0	0	0	1	0	0	0
NZ_CP011448.1	520	Bordetella pertussis	4111557	2707	4	4	0	0	0	3	1	0	0	0	4	0	0	0
NZ_CP009482.1	1299329	Mycobacterium avium subsp. avium 2285 (S)	5197664	3229	2	2	0	0	0	2	0	0	0	0	2	0	0	0
NZ_CP009785.1	632	Yersinia pestis	4838262	3093	2	2	0	0	0	0	1	1	0	1	2	0	0	0
NZ_AP012496.1	1204342	Bacillus subtilis BEST7003	4043042	2537	2	2	0	0	0	0	2	0	0	0	2	0	0	0
NC_015977.1	585394	Roseburia hominis A2-183	3592125	2249	1	1	0	0	0	1	0	0	0	1	1	0	0	0
NZ_CP007693.1	645170	Brucella suis bv. 2	3325042	2160	1	1	0	0	0	0	0	0	0	0	1	0	0	0
NC_010508.1	406425	Burkholderia cenocepacia MC0-3	7971389	4934	4	4	0	0	0	4	0	0	0	0	3	0	0	0
NC_007712.1	343509	Sodalis glossinidius str. 'morsitans'	4292502	2788	2	2	0	0	0	2	0	0	0	1	2	0	0	0
NZ_CP009046.1	1282	Staphylococcus epidermidis	2538314	1603	0	0	0	0	0	0	0	0	0	0	0	0	0	0
NC_015520.1	697281	Mahella australiensis 50-1 BON	3135972	2035	3	3	0	0	0	3	0	0	0	1	3	0	0	0
NZ_CP008992.1	1308548	Xanthomonas citri subsp. citri UI6	5222433	3320	4	3	0	0	0	0	3	0	0	0	4	0	0	0
NC_017316.1	474186	Enterococcus faecalis OG1RF	2739625	1751	4	4	0	0	0	4	0	0	0	0	0	0	0	0
NC_018721.1	313595	Psychroflexus torquis ATCC 700755	4321832	2710	5	4	0	0	0	4	0	0	0	1	4	0	0	0
NZ_CP007004.1	1429044	Vibrio parahaemolyticus UCM-V493	5232572	3272	5	5	0	0	0	5	0	0	0	0	4	0	0	0
NZ_CP012195.1	1032069	Campylobacter ureolyticus RIGS 9880	1641887	1027	1	0	0	0	0	0	0	0	0	0	0	0	0	0
NC_017354.1	684950	Helicobacter pylori 52	1568826	999	1	1	0	0	0	1	0	0	0	0	1	0	0	0
NZ_AP011952.1	866790	Methanothermobacter sp. CaT2	1731018	1071	1	1	0	0	0	0	1	0	0	1	1	0	0	0
NC_022115.1	1136179	Rhodococcus erythropolis CCM2595	6371421	4132	6	6	0	0	0	6	0	0	0	1	6	0	0	0
NC_020940.1	1071767	Chlamydia trachomatis Ia/SotonIa3	1050283	686	1	1	0	0	0	1	0	0	0	0	1	0	0	0
NC_023019.1	1415629	Pseudomonas aeruginosa MTB-1	6580038	4251	2	2	0	0	0	1	1	0	0	0	2	0	0	0
NC_016912.1	1028799	Staphylococcus aureus subsp. aureus VC40	2692570	1690	1	1	0	0	0	1	0	0	0	0	1	0	0	0
NZ_CP003181.1	1052004	Granulibacter bethesdensis CGDNIH3	2711143	1796	2	2	0	0	0	2	0	0	0	0	2	0	0	0
NC_004556.1	183190	Xylella fastidiosa Temecula1	2521148	1597	2	2	0	0	0	2	0	0	0	0	0	0	0	0
NC_017587.1	798128	Thermus thermophilus JL-18	2311212	1461	2	2	0	0	0	2	0	0	0	0	2	0	0	0
NC_019435.1	1111678	Lactococcus lactis subsp. cremoris UC509.9	2457347	1551	1	1	0	0	0	1	0	0	0	0	1	0	0	0
NC_008600.1	412694	Bacillus thuringiensis str. Al Hakam	5313030	3458	4	4	0	0	0	1	3	0	0	0	4	0	0	0
NC_008942.1	410358	Methanocorpusculum labreanum Z	1804962	1157	0	0	0	0	0	0	0	0	0	1	0	0	0	0
NZ_CP002580.1	595500	Burkholderia glumae PG1	7896538	4949	7	7	0	0	0	4	3	0	0	0	1	0	1	0
NZ_CP010327.1	1583100	Myroides sp. A21	4155464	2611	5	5	0	0	0	5	0	0	0	1	5	0	0	0
NZ_CP007600.1	1639	Listeria monocytogenes	2906670	1932	2	2	0	0	0	2	0	0	0	0	2	0	0	0
NC_010581.1	395963	Beijerinckia indica subsp. indica ATCC 9039	4418616	2929	2	2	0	0	0	2	0	0	0	1	2	0	0	0
NC_021006.1	869303	Streptococcus pneumoniae SPN034156	2024476	1338	1	1	0	0	0	1	0	0	0	0	1	0	0	0
NC_015847.1	1053692	Methanococcus maripaludis X1	1746697	1061	3	3	0	0	0	3	0	0	0	0	2	0	0	0
NZ_HG813247.1	1437838	Listeria monocytogenes R479a	3031650	1993	1	1	0	0	0	1	0	0	0	0	1	0	0	0
NC_018015.1	163003	Thermococcus cleftensis	1950313	1291	2	2	0	0	0	2	0	0	0	0	0	0	1	0
NZ_CP006825.1	1382925	Helicobacter pylori oki673	1595058	1001	2	1	0	0	0	1	0	0	0	0	2	0	0	0
NC_010505.1	426355	Methylobacterium radiotolerans JCM 2831	6899110	4439	5	4	0	1	0	4	0	1	0	0	1	0	1	0
NC_000917.1	224325	Archaeoglobus fulgidus DSM 4304	2178400	1413	2	2	0	0	0	2	0	0	0	0	0	0	0	0
NZ_LN831027.1	76857	Fusobacterium nucleatum subsp. polymorphum	2455060	1592	0	0	0	0	0	0	0	0	0	0	0	0	0	0
NZ_CP006690.1	1051650	Lactobacillus casei 12A	2907892	1814	1	1	0	0	0	0	1	0	0	0	1	0	0	0
NC_020908.1	391616	Octadecabacter arcticus 238	5478249	3543	4	4	0	0	0	4	0	0	0	0	0	0	0	0
NZ_CP006792.1	1345702	Yersinia pestis 2944	4672740	2969	3	3	0	0	0	0	3	0	0	0	3	0	0	0
NC_021050.1	1263406	Chlamydia trachomatis L2/434/Bu(i)	1046341	662	0	0	0	0	0	0	0	0	0	0	0	0	0	0
NZ_CP007399.1	287	Pseudomonas aeruginosa	6603099	4167	3	3	0	0	0	3	0	0	0	0	3	0	0	0
NC_017052.1	1080229	Synechocystis sp. PCC 6803 substr. PCC-N	3570103	2346	3	3	0	0	0	3	0	0	0	0	3	0	0	0
NC_006396.1	272569	Haloarcula marismortui ATCC 43049	4274642	2723	4	4	0	0	0	4	0	0	0	1	4	0	0	0
NC_017171.1	497978	Acinetobacter baumannii MDR-ZJ06	4011434	2576	3	3	0	0	0	3	0	0	0	0	3	0	0	0
NC_017025.1	1094466	Flavobacterium indicum GPTSA100-9 = DSM 17447	2993089	1814	2	2	0	0	0	2	0	0	0	0	0	0	0	0
NC_018142.1	767029	Propionibacterium propionicum F0230a	3449360	2133	2	2	0	0	0	2	0	0	0	1	2	0	0	0
NC_016114.1	591167	Streptomyces pratensis ATCC 33331	7656104	4854	8	8	0	0	0	6	2	0	0	0	1	0	0	1
NC_015433.1	1007064	Streptococcus suis ST3	2028815	1305	0	0	0	0	0	0	0	0	0	0	0	0	0	0
NZ_CP001621.1	436113	Mycoplasma mycoides subsp. capri str. GM12	1089202	684	0	0	0	0	0	0	0	0	0	0	0	0	0	0
NC_007681.1	339860	Methanosphaera stadtmanae DSM 3091	1767403	1133	0	0	0	0	0	0	0	0	0	1	0	0	0	0
NZ_CP012573.1	28447	Clavibacter michiganensis	3241713	2064	1	1	0	0	0	1	0	0	0	1	1	0	0	0
NC_009850.1	367737	Arcobacter butzleri RM4018	2341251	1472	0	0	0	0	0	0	0	0	0	0	0	0	0	0
NZ_CP010283.1	796733	Salmonella enterica subsp. enterica serovar Newport str. CVM 21550	4858179	3199	1	1	0	0	0	0	1	0	0	0	1	0	0	0
NZ_CP001974.1	673518	Bacillus anthracis str. A16R	5409446	3434	4	4	0	0	0	0	3	0	1	0	4	0	0	0
NC_016603.1	871585	Acinetobacter calcoaceticus PHEA-2	3862530	2416	4	4	0	0	0	4	0	0	0	1	4	0	0	0
NC_015067.1	565042	Bifidobacterium longum subsp. longum JCM 1217	2385164	1555	3	3	0	0	0	2	1	0	0	0	3	0	0	0
NZ_CP009906.1	360102	Yersinia pestis Antiqua	4884396	3110	2	2	0	0	0	0	2	0	0	0	2	0	0	0
NC_013173.1	525897	Desulfomicrobium baculatum DSM 4028	3942657	2547	7	7	0	0	0	7	0	0	0	1	7	0	0	0
NC_014659.1	685727	Rhodococcus equi 103S	5043170	3314	3	3	0	0	0	3	0	0	0	0	0	0	1	0
NC_017730.2	1087451	Corynebacterium pseudotuberculosis 31	2389687	1548	1	1	0	0	0	1	0	0	0	0	1	0	0	0
NZ_CP011343.2	1411691	Escherichia coli GM4792	4621656	3005	1	0	1	0	0	0	1	0	0	0	0	1	0	0
NC_012125.1	476213	Salmonella enterica subsp. enterica serovar Paratyphi C str. RKS4594	4888494	3170	3	3	0	0	0	2	1	0	0	0	3	0	0	0
NZ_CP006837.1	1145276	Lysinibacillus varians	4662822	2913	5	5	0	0	0	5	0	0	0	1	5	0	0	0
NC_018410.1	1159201	Mycoplasma gallisepticum WI01_2001.043-13-2P	939844	608	0	0	0	0	0	0	0	0	0	0	0	0	0	0
NC_008609.1	338966	Pelobacter propionicus DSM 2379	4241119	2754	3	3	0	0	0	3	0	0	0	1	3	0	0	0
NZ_CP006882.1	166314	Synechococcus sp. WH 8109	2111515	1410	1	1	0	0	0	1	0	0	0	0	0	0	0	0
NC_003116.1	122587	Neisseria meningitidis Z2491	2184406	1351	1	1	0	0	0	1	0	0	0	0	1	0	0	0
NZ_CP009749.1	1423	Bacillus subtilis	3959897	2495	2	2	0	0	0	0	1	1	0	0	2	0	0	0
NC_023060.1	1431547	Chlamydia trachomatis C/TW-3	1051055	672	0	0	0	0	0	0	0	0	0	0	0	0	0	0
NZ_CP011855.1	1114980	Spiroplasma atrichopogonis	1160484	741	0	0	0	0	0	0	0	0	0	0	0	0	0	0
NC_023032.1	1401659	Cronobacter sakazakii CMCC 45402	4559945	2871	2	2	0	0	0	2	0	0	0	0	1	0	0	0
NC_021891.1	907270	Chlamydia trachomatis RC-J(s)/122	1061854	632	1	1	0	0	0	1	0	0	0	0	1	0	0	0
NZ_CP009488.1	1249668	Burkholderia ubonensis MSMB22	7189071	4610	3	3	0	0	0	3	0	0	0	0	1	0	0	0
NC_009792.1	290338	Citrobacter koseri ATCC BAA-895	4735357	3002	5	4	0	0	0	4	0	0	0	0	1	1	0	1
NC_004668.1	226185	Enterococcus faecalis V583	3359974	2120	2	2	0	0	0	2	0	0	0	0	0	0	0	0
NC_023037.2	1429244	Paenibacillus polymyxa CR1	6019882	3996	4	4	0	0	0	3	1	0	0	1	4	0	0	0
NC_014121.1	716541	Enterobacter cloacae subsp. cloacae ATCC 13047	5598796	3636	3	2	1	0	0	2	1	0	0	0	0	1	0	0
NC_007954.1	318161	Shewanella denitrificans OS217	4545906	2828	1	1	0	0	0	1	0	0	0	1	1	0	0	0
NZ_CP009170.1	2325	Thermoanaerobacter kivui	2397824	1495	3	3	0	0	0	3	0	0	0	1	3	0	0	0
NC_022243.1	528354	Neisseria gonorrhoeae MS11	2237793	1433	0	0	0	0	0	0	0	0	0	1	0	0	0	0
NC_021896.1	907266	Chlamydia trachomatis RC-J/943	1038797	648	1	1	0	0	0	1	0	0	0	0	1	0	0	0
NC_013119.1	568815	Brucella microti CCM 4915	3337369	2188	3	3	0	0	0	0	0	0	0	0	3	0	0	0
NC_015758.1	572418	Mycobacterium africanum GM041182	4389314	2784	1	1	0	0	0	0	1	0	0	0	1	0	0	0
NC_004193.1	221109	Oceanobacillus iheyensis HTE831	3630528	2307	2	2	0	0	0	2	0	0	0	1	2	0	0	0
NC_008702.1	62928	Azoarcus sp. BH72	4376040	2773	4	4	0	0	0	4	0	0	0	1	4	0	0	0
NC_007776.1	321332	Synechococcus sp. JA-2-3B'a(2-13)	3046682	1901	5	5	0	0	0	4	1	0	0	0	0	0	0	0
NC_015580.1	702113	Novosphingobium sp. PP1Y	5313905	3475	1	1	0	0	0	1	0	0	0	0	0	0	0	0
NC_017622.1	993512	Streptococcus suis A7	2038409	1212	1	1	0	0	0	1	0	0	0	0	1	0	0	0
NZ_CP003811.1	693986	Methylobacterium oryzae CBMB20	6286629	3993	4	4	0	0	0	4	0	0	0	0	0	0	0	0
NC_022513.1	1366050	Ralstonia pickettii DTP0602	8125850	5098	6	6	0	0	0	6	0	0	0	0	0	0	2	0
NZ_CP006870.1	1416915	Aeromonas hydrophila NJ-35	5279644	3296	6	6	0	0	0	6	0	0	0	0	6	0	0	0
NC_015672.1	717231	Flexistipes sinusarabici DSM 4947	2526590	1683	1	1	0	0	0	1	0	0	0	1	1	0	0	0
NC_018081.1	768486	Enterococcus hirae ATCC 9790	2856440	1754	3	3	0	0	0	3	0	0	0	1	3	0	0	0
NC_011963.1	557760	Rhodobacter sphaeroides KD131	4711139	3044	3	3	0	0	0	3	0	0	0	1	3	0	0	0
NC_013202.1	485914	Halomicrobium mukohataei DSM 12286	3332349	2111	2	2	0	0	0	2	0	0	0	1	2	0	0	0
NC_012947.1	866768	Escherichia coli 'BL21-Gold(DE3)pLysS AG'	4570938	2937	1	0	0	0	0	0	0	0	0	0	0	1	0	0
NC_014974.1	743525	Thermus scotoductus SA-01	2355186	1539	2	2	0	0	0	2	0	0	0	0	0	0	0	0
NC_007651.1	271848	Burkholderia thailandensis E264	6723972	4340	6	6	0	0	0	6	0	0	0	0	4	0	0	0
NZ_CP008876.1	586416	Terribacillus aidingensis	3577082	2318	2	2	0	0	0	2	0	0	0	1	2	0	0	0
NC_021286.1	1321370	Idiomarina loihiensis GSL 199	2839759	1789	3	3	0	0	0	3	0	0	0	1	3	0	0	0
NC_012881.1	526222	Desulfovibrio salexigens DSM 2638	4289847	2723	1	1	0	0	0	1	0	0	0	1	1	0	0	0
NZ_CP011446.1	520	Bordetella pertussis	4103254	2567	3	2	0	0	0	1	1	0	0	0	2	0	0	0
NZ_CP007669.1	480	Moraxella catarrhalis	1887974	1264	2	2	0	0	0	2	0	0	0	0	2	0	0	0
NZ_CP007804.1	90371	Salmonella enterica subsp. enterica serovar Typhimurium	4857390	3119	3	1	1	0	0	1	1	0	0	0	2	1	0	0
NC_017857.2	754476	Methylophaga nitratireducenticrescens	3137191	1921	1	1	0	0	0	1	0	0	0	1	1	0	0	0
NC_011834.1	561501	Buchnera aphidicola str. Tuc7 (Acyrthosiphon pisum)	641895	402	1	1	0	0	0	1	0	0	0	0	1	0	0	0
NZ_CP009642.1	13373	Burkholderia mallei	5686446	3614	0	0	0	0	0	0	0	0	0	0	0	0	0	0
NC_017584.1	1036743	Rhodospirillum rubrum F11	4352825	2788	2	2	0	0	0	2	0	0	0	1	2	0	0	0
NC_007429.1	315277	Chlamydia trachomatis A/HAR-13	1051969	640	2	2	0	0	0	2	0	0	0	0	2	0	0	0
NC_009482.1	316278	Synechococcus sp. RCC307	2224914	1469	1	1	0	0	0	1	0	0	0	0	0	0	0	0
NZ_CP008831.1	1328325	Klebsiella pneumoniae subsp. pneumoniae KPR0928	5436785	3445	4	4	0	0	0	4	0	0	0	0	4	0	0	0
NC_010602.1	456481	Leptospira biflexa serovar Patoc strain 'Patoc 1 (Paris)'	3951448	2497	4	4	0	0	0	4	0	0	0	0	0	0	0	0
NC_013456.1	150340	Vibrio antiquarius	5089025	3195	1	1	0	0	0	1	0	0	0	0	0	0	0	0
NZ_CP007470.1	727	Haemophilus influenzae	1846259	1161	1	1	0	0	0	1	0	0	0	0	1	0	0	0
NC_018525.1	1218933	Pectobacterium carotovorum subsp. carotovorum PCC21	4842771	3013	3	3	0	0	0	3	0	0	0	0	0	0	0	0
NZ_CP002082.1	838561	Spiroplasma mirum ATCC 29335	1132591	756	1	1	0	0	0	0	0	1	0	1	0	0	0	0
NC_003450.3	196627	Corynebacterium glutamicum ATCC 13032	3309401	2156	3	3	0	0	0	2	1	0	0	0	3	0	0	0
NC_014205.1	591019	Staphylothermus hellenicus DSM 12710	1580347	984	0	0	0	0	0	0	0	0	0	1	0	0	0	0
NC_011567.1	491915	Anoxybacillus flavithermus WK1	2846746	1881	1	1	0	0	0	1	0	0	0	1	1	0	0	0
NC_014632.1	572544	Ilyobacter polytropus DSM 2926	3132314	2064	2	2	0	0	0	2	0	0	0	1	2	0	0	0
NZ_CP007700.1	235	Brucella abortus	3285289	2037	5	5	0	0	0	0	0	0	2	0	5	0	0	0
NC_014926.1	648996	Thermovibrio ammonificans HB-1	1759526	1110	0	0	0	0	0	0	0	0	0	1	0	0	0	0
NZ_CP008918.1	747	Pasteurella multocida	2271840	1433	2	1	0	0	0	1	0	0	0	0	2	0	0	0
NC_017304.1	637887	Ruminiclostridium thermocellum DSM 1313	3561619	2241	1	1	0	0	0	1	0	0	0	1	1	0	0	0
NC_002737.2	160490	Streptococcus pyogenes M1 GAS	1852433	1179	1	0	0	0	0	0	0	0	0	0	0	0	0	0
NC_011134.1	552526	Streptococcus equi subsp. zooepidemicus MGCS10565	2024171	1270	2	2	0	0	0	2	0	0	0	0	0	0	0	0
NC_015416.1	990316	Methanosaeta concilii GP6	3026645	1958	5	5	0	0	0	5	0	0	0	1	5	0	0	0
NZ_CP007560.1	1314	Streptococcus pyogenes	1915554	1214	0	0	0	0	0	0	0	0	0	0	0	0	0	0
NZ_CP012045.1	1314	Streptococcus pyogenes	1943415	1264	0	0	0	0	0	0	0	0	0	0	0	0	0	0
NC_011832.1	521011	Methanosphaerula palustris E1-9c	2922917	1948	1	1	0	0	0	1	0	0	0	1	1	0	0	0
NZ_CP009283.1	1536772	Paenibacillus sp. FSL R7-0273	7288921	4669	3	3	0	0	0	3	0	0	0	0	0	0	0	0
NC_016933.1	1001542	Francisella tularensis subsp. tularensis TIGB03	1968651	1298	1	1	0	0	0	1	0	0	0	0	1	0	0	0
NC_007775.1	321327	Synechococcus sp. JA-3-3Ab	2932766	1951	2	2	0	0	0	2	0	0	0	0	0	0	0	0
NC_018709.3	1201032	Campylobacter jejuni subsp. jejuni PT14	1635301	1045	2	2	0	0	0	2	0	0	0	0	2	0	0	0
NC_017571.1	693974	Shewanella baltica BA175	5199401	3312	2	2	0	0	0	2	0	0	0	0	2	0	0	0
NC_017668.1	866895	Halobacillus halophilus DSM 2266	4170008	2585	2	2	0	0	0	2	0	0	0	1	2	0	0	0
NC_018645.1	651182	Desulfobacula toluolica Tol2	5197905	3402	4	3	0	0	0	3	0	0	0	1	3	0	0	0
NZ_CP006950.1	1432060	Dehalococcoides mccartyi CG4	1382308	895	1	1	0	0	0	1	0	0	0	1	1	0	0	0
NZ_CP012647.1	1747	Propionibacterium acnes	2522438	1578	1	1	0	0	0	1	0	0	0	0	1	0	0	0
NC_014029.1	637386	Yersinia pestis Z176003	4725788	3068	2	2	0	0	0	0	2	0	0	0	2	0	0	0
NC_011993.1	591946	Escherichia coli LF82	4773108	3099	1	1	0	0	0	1	0	0	0	0	1	0	0	0
NC_015682.1	795359	Thermodesulfobacterium geofontis OPF15	1634377	966	0	0	0	0	0	0	0	0	0	1	0	0	0	0
NZ_CP009554.1	46170	Staphylococcus aureus subsp. aureus	2886017	1859	1	1	0	0	0	0	1	0	0	0	1	0	0	0
NZ_CP009933.1	1548	Clostridium scatologenes	5749410	3699	6	5	0	0	0	4	1	0	0	0	0	0	0	0
NZ_CP009460.1	158822	Cedecea neteri	5052868	3311	4	3	1	0	0	3	1	0	0	0	0	0	2	0
NC_021083.1	1292033	Mycoplasma putrefaciens Mput9231	859996	561	2	1	0	0	0	1	0	0	0	0	0	0	0	0
NC_020089.1	1138877	Mycobacterium tuberculosis 7199-99	4421197	2824	5	5	0	0	0	0	5	0	0	0	5	0	0	0
NZ_CP011930.1	964	Herbaspirillum seropedicae	5509723	3517	1	1	0	0	0	1	0	0	0	0	1	0	0	0
NC_017672.3	997761	Paenibacillus mucilaginosus K02	8819200	5723	2	2	0	0	0	2	0	0	0	0	0	0	0	0
NZ_CP010019.1	539329	Francisella philomiragia subsp. philomiragia ATCC 25015	2017400	1220	2	2	0	0	0	1	1	0	0	0	2	0	0	0
NC_015312.1	675635	Pseudonocardia dioxanivorans CB1190	7303989	4727	4	3	0	0	0	3	0	0	0	1	3	0	0	0
NC_012441.1	546272	Brucella melitensis ATCC 23457	3311219	2128	4	4	0	0	0	0	0	0	0	0	4	0	0	0
NC_021839.1	1639	Listeria monocytogenes	3009523	1962	1	1	0	0	0	1	0	0	0	0	1	0	0	0
NZ_CP008780.1	28450	Burkholderia pseudomallei	7027950	4475	5	5	0	0	0	0	5	0	0	0	5	0	0	0
NC_013889.1	396595	Thioalkalivibrio sp. K90mix	2985056	1895	1	1	0	0	0	1	0	0	0	1	1	0	0	0
NZ_CP007531.1	984211	Salmonella enterica subsp. enterica serovar Anatum str. ATCC BAA-1592	4706101	2961	4	4	0	0	0	4	0	0	0	0	4	0	0	0
NZ_CP009274.1	244366	Klebsiella variicola	5718434	3644	8	8	0	0	0	1	7	0	0	0	5	1	0	0
NZ_FO704550.1	351671	Xenorhabdus doucetiae	4203651	2697	0	0	0	0	0	0	0	0	0	0	0	0	0	0
NZ_CP013131.1	1403338	Porphyromonas gingivalis A7A1-28	2249024	1506	1	1	0	0	0	1	0	0	0	1	1	0	0	0
NC_008529.1	321956	Lactobacillus delbrueckii subsp. bulgaricus ATCC BAA-365	1856951	1176	2	2	0	0	0	2	0	0	0	0	0	0	0	0
NC_021005.1	869307	Streptococcus pneumoniae SPN994039	2026505	1251	1	1	0	0	0	1	0	0	0	0	1	0	0	0
NC_010410.1	509173	Acinetobacter baumannii AYE	4048735	2513	1	1	0	0	0	0	0	1	0	1	1	0	0	0
NZ_CP012889.1	1403335	Porphyromonas gingivalis 381	2378872	1525	1	1	0	0	0	1	0	0	0	0	1	0	0	0
NC_022370.1	1382700	Escherichia coli PMV-1	5210927	3257	1	1	0	0	0	1	0	0	0	0	1	0	0	0
NC_021064.1	1170318	Propionibacterium avidum 44067	2526138	1636	2	2	0	0	0	2	0	0	0	0	0	0	0	0
NC_010120.1	374833	Neisseria meningitidis 053442	2153416	1341	1	1	0	0	0	1	0	0	0	1	1	0	0	0
NZ_LN908249.1	754345	Actinobacillus pleuropneumoniae serovar 8	2337633	1451	3	3	0	0	0	3	0	0	0	1	3	0	0	0
NZ_CP009832.1	985079	Burkholderia multivorans ATCC BAA-247	6322746	4068	4	4	0	0	0	4	0	0	0	0	3	0	0	0
NC_014364.1	573413	Spirochaeta smaragdinae DSM 11293	4653970	2996	1	1	0	0	0	1	0	0	0	1	1	0	0	0
NZ_CP011495.1	562	Escherichia coli	4745591	3037	5	2	3	0	0	2	2	0	1	0	3	2	0	0
NZ_CP007502.1	272556	Aggregatibacter actinomycetemcomitans HK1651	2105503	1332	2	2	0	0	0	2	0	0	0	0	2	0	0	0
NZ_CP010542.1	1263756	Mycoplasma pneumoniae 54089	816565	533	1	1	0	0	0	1	0	0	0	0	1	0	0	0
NC_017952.1	1071759	Chlamydia trachomatis E/SW3	1042903	660	0	0	0	0	0	0	0	0	0	0	0	0	0	0
NZ_CP011303.1	614	Serratia liquefaciens	5326657	3433	5	5	0	0	0	5	0	0	0	0	4	0	0	0
NC_017146.1	634456	Acetobacter pasteurianus IFO 3283-26	3339683	2195	2	2	0	0	0	2	0	0	0	0	2	0	0	0
NZ_CP006688.1	1385722	Campylobacter jejuni subsp. jejuni NCTC 11168-mfK12E5	1641469	993	3	3	0	0	0	2	1	0	0	0	3	0	0	0
NZ_CP007731.1	1328324	Klebsiella pneumoniae subsp. pneumoniae KPNIH27	6132443	3891	3	2	0	0	1	0	2	0	0	0	3	0	0	0
NC_009337.1	290318	Chlorobium phaeovibrioides DSM 265	1966858	1243	1	1	0	0	0	1	0	0	0	1	1	0	0	0
NC_019738.1	1173027	Microcoleus sp. PCC 7113	7966510	5146	2	2	0	0	0	2	0	0	0	1	2	0	0	0
NC_015424.1	998088	Aeromonas veronii B565	4551783	2926	3	3	0	0	0	3	0	0	0	0	1	0	0	0
NC_019907.1	1215343	Liberibacter crescens BT-1	1504659	927	3	3	0	0	0	3	0	0	0	0	0	0	0	0
NC_017946.1	1183377	Pyrococcus sp. ST04	1736885	1134	2	2	0	0	0	2	0	0	0	0	0	0	0	0
NZ_LN515399.1	40480	Mycoplasma capricolum subsp. capripneumoniae	1017183	657	0	0	0	0	0	0	0	0	0	0	0	0	0	0
NC_003106.2	273063	Sulfolobus tokodaii str. 7	2694756	1761	1	1	0	0	0	1	0	0	0	0	0	0	0	0
NC_000921.1	85963	Helicobacter pylori J99	1643831	1094	1	1	0	0	0	1	0	0	0	0	1	0	0	0
NC_004603.1	223926	Vibrio parahaemolyticus RIMD 2210633	5165770	3383	5	5	0	0	0	5	0	0	0	0	5	0	0	0
NC_007404.1	292415	Thiobacillus denitrificans ATCC 25259	2909809	1863	1	1	0	0	0	1	0	0	0	1	1	0	0	0
NC_017592.1	869215	Streptococcus pneumoniae OXC141	2036867	1263	3	3	0	0	0	2	1	0	0	0	3	0	0	0
NC_022523.1	1167629	Bifidobacterium animalis subsp. lactis ATCC 27673	1963012	1267	0	0	0	0	0	0	0	0	0	0	0	0	0	0
NZ_CP010268.1	1406	Paenibacillus polymyxa	5829236	3742	5	5	0	0	0	5	0	0	0	0	2	0	0	0
NC_007947.1	265072	Methylobacillus flagellatus KT	2971517	1854	2	2	0	0	0	2	0	0	0	1	2	0	0	0
NC_006361.1	247156	Nocardia farcinica IFM 10152	6292344	3979	2	2	0	0	0	2	0	0	0	0	0	0	0	0
NC_014378.1	574087	Acetohalobium arabaticum DSM 5501	2469596	1612	4	2	0	0	0	2	0	0	0	1	3	0	0	0
NC_002953.3	282459	Staphylococcus aureus subsp. aureus MSSA476	2820454	1893	2	2	0	0	0	2	0	0	0	0	2	0	0	0
NC_009485.1	288000	Bradyrhizobium sp. BTAi1	8493513	5428	6	6	0	0	0	6	0	0	0	0	1	1	1	0
NC_017351.1	1123523	Staphylococcus aureus subsp. aureus 11819-97	2868863	1860	2	2	0	0	0	2	0	0	0	0	2	0	0	0
NC_017275.1	930943	Sulfolobus islandicus HVE10/4	2655201	1677	0	0	0	0	0	0	0	0	0	0	0	0	0	0
NZ_CP007476.1	1249653	Ehrlichia chaffeensis str. Liberty	1176202	760	0	0	0	0	0	0	0	0	0	0	0	0	0	0
NC_010609.1	557433	Lactobacillus reuteri JCM 1112	2039414	1298	1	1	0	0	0	1	0	0	0	0	0	0	0	0
NC_015215.1	990317	Streptococcus gallolyticus subsp. gallolyticus ATCC BAA-2069	2377209	1501	1	1	0	0	0	1	0	0	0	0	1	0	0	0
NC_017379.1	1055529	Helicobacter pylori Puno135	1646139	1097	2	2	0	0	0	2	0	0	0	0	2	0	0	0
NC_011773.1	405535	Bacillus cereus AH820	5588834	3594	4	4	0	0	0	0	3	1	0	0	4	0	0	0
NZ_CP007574.1	68570	Streptomyces albulus	9372401	6168	7	7	0	0	0	6	0	1	0	0	0	0	0	0
NZ_CP010521.1	1491	Clostridium botulinum	3611898	2277	2	2	0	0	0	2	0	0	0	0	0	0	0	0
NZ_CP007409.1	1404258	Bacillus subtilis subsp. subtilis str. OH 131.1	4039155	2608	3	3	0	0	0	0	3	0	0	0	3	0	0	0
NC_015508.1	861208	Agrobacterium sp. H13-3	5573770	3592	3	3	0	0	0	1	2	0	0	0	2	0	0	0
NC_019425.2	1234679	Carnobacterium maltaromaticum LMA28	3650416	2382	2	2	0	0	0	2	0	0	0	0	0	0	0	0
NC_017368.1	866344	Helicobacter pylori F16	1575399	1013	2	1	0	0	0	1	0	0	0	0	2	0	0	0
NZ_CP009088.1	149539	Salmonella enterica subsp. enterica serovar Enteritidis	4677619	2915	3	3	0	0	0	2	1	0	0	0	3	0	0	0
[truncated: 2,284 more rows]

## Sheet: kraken
Sequence Id	Taxonomy Id	Scientific Name	# of reads from 10K	Genus_Correct	Genus_Multi+Correct	Genus_Incorrect	Genus_Multi+Incorrect	Species_Correct	Species_Multi+Correct	Species_Incorrect	Species_Multi+Incorrect
NZ_CP009261.1	672	Vibrio vulnificus	2	1	0	0	0	1	0	0	0
NC_017253.1	713601	Buchnera aphidicola str. JF99 (Acyrthosiphon pisum)	2	1	0	0	0	1	0	0	0
NZ_CP008984.1	272556	Aggregatibacter actinomycetemcomitans HK1651	0	0	0	0	0	0	0	0	0
NZ_CP006823.1	1382923	Helicobacter pylori oki154	1	1	0	0	0	1	0	0	0
NZ_LN907858.1	76936	Helicobacter typhlonius	4	4	0	0	0	3	0	0	0
NC_018101.1	996634	Corynebacterium ulcerans 0102	2	1	0	0	0	1	0	0	0
NC_017262.1	555217	Zymomonas mobilis subsp. mobilis ATCC 10988	1	1	0	0	0	1	0	0	0
NZ_CP010276.1	96345	Flavobacterium psychrophilum	0	0	0	0	0	0	0	0	0
NZ_CP009408.1	319705	Mycobacterium abscessus subsp. bolletii	1	1	0	0	0	1	0	0	0
NZ_CP007566.1	1418110	Aeromonas hydrophila AL09-71	0	0	0	0	0	0	0	0	0
NZ_CP007793.1	192	Azospirillum brasilense	2	2	0	0	0	2	0	0	0
NC_004631.1	209261	Salmonella enterica subsp. enterica serovar Typhi str. Ty2	1	1	0	0	0	1	0	0	0
NC_014501.1	497965	Cyanothece sp. PCC 7822	1	1	0	0	0	1	0	0	0
NZ_CP007505.1	1003191	Salmonella enterica subsp. enterica serovar Tennessee str. TXSC_TXSC08-19	0	0	0	0	0	0	0	0	0
NZ_CP011004.1	1639	Listeria monocytogenes	5	3	0	0	0	3	0	0	0
NZ_HF572917.1	562	Escherichia coli	5	2	0	0	0	2	0	0	0
NC_017027.1	1132496	Pasteurella multocida subsp. multocida str. HN06	0	0	0	0	0	0	0	0	0
NZ_CP009847.1	670	Vibrio parahaemolyticus	4	4	0	0	0	3	0	0	0
NC_016516.1	1114966	Propionibacterium acnes TypeIA2 P.acn33	2	2	0	0	0	2	0	0	0
NC_014925.1	937773	Staphylococcus pseudintermedius HKU10-03	2	2	0	0	0	2	0	0	0
NC_014318.1	749927	Amycolatopsis mediterranei U32	3	3	0	0	0	3	0	0	0
NZ_CP007806.1	1042163	Brevibacillus laterosporus LMG 15441	4	4	0	0	0	4	0	0	0
NZ_LN774769.1	297352	Lactococcus piscium MKFS47	2	2	0	0	0	2	0	0	0
NZ_CP012370.1	1525	Moorella thermoacetica	1	1	0	0	0	1	0	0	0
NC_022529.1	1347340	Campylobacter jejuni 4031	0	0	0	0	0	0	0	0	0
NC_022196.1	469604	Fusobacterium nucleatum subsp. vincentii 3_1_36A2	0	0	0	0	0	0	0	0	0
NC_018527.1	1229785	Burkholderia pseudomallei BPC006	2	2	0	0	0	1	0	0	0
NC_017214.1	552531	Bifidobacterium animalis subsp. lactis BB-12	1	1	0	0	0	1	0	0	0
NC_014494.1	574093	Streptococcus pneumoniae AP200	3	3	0	0	0	3	0	0	0
NC_017904.1	1168287	Mycobacterium sp. MOTT36Y	3	3	0	0	0	0	0	0	0
NZ_CP011572.1	550	Enterobacter cloacae	2	1	0	0	0	1	0	0	0
NZ_CP009298.1	360118	Burkholderia pseudomallei 406e	5	4	0	0	0	3	0	0	0
NC_018937.1	1234365	Helicobacter pylori Rif1	2	2	0	0	0	2	0	0	0
NC_017251.1	204722	Brucella suis 1330	1	1	0	0	0	0	0	0	0
NC_012440.1	123214	Persephonella marina EX-H1	1	1	0	0	0	1	0	0	0
NC_010943.1	522373	Stenotrophomonas maltophilia K279a	4	4	0	0	0	4	0	0	0
NZ_CP006758.1	1345705	Yersinia pestis 1522	4	4	0	0	0	0	0	0	0
NZ_CP011246.1	358	Agrobacterium tumefaciens	6	6	0	0	0	5	0	0	0
NZ_CP010409.1	56458	Xanthomonas sacchari	4	4	0	0	0	4	0	0	0
NZ_CP006711.1	1385938	Bifidobacterium breve 12L	2	2	0	0	0	0	0	0	0
NC_021878.1	1036172	Arcobacter butzleri 7h1h	3	3	0	0	0	3	0	0	0
NC_003062.2	176299	Agrobacterium fabrum str. C58	8	8	0	0	0	7	0	0	0
NZ_CP009503.1	1434103	Methanosarcina sp. WWM596	3	3	0	0	0	0	0	0	0
NC_010280.2	471473	Chlamydia trachomatis L2b/UCH-1/proctitis	1	1	0	0	0	1	0	0	0
NC_015930.1	420889	Lactococcus garvieae ATCC 49156	0	0	0	0	0	0	0	0	0
NC_007333.1	269800	Thermobifida fusca YX	2	2	0	0	0	2	0	0	0
NC_004070.1	198466	Streptococcus pyogenes MGAS315	2	2	0	0	0	1	0	0	0
NZ_CP009428.1	189426	Paenibacillus odorifer	3	3	0	0	0	3	0	0	0
NZ_CP012559.1	1074467	Lactobacillus heilongjiangensis	1	1	0	0	0	1	0	0	0
NC_017617.1	423211	Streptococcus suis GZ1	0	0	0	0	0	0	0	0	0
NZ_CP010907.1	1235990	Candidatus Pantoea carbekii	1	1	0	0	0	1	0	0	0
NC_017525.1	1081094	Legionella pneumophila subsp. pneumophila str. Hextuple_2q	3	3	0	0	0	3	0	0	0
NZ_CP007584.1	1454585	Salmonella enterica subsp. enterica serovar Anatum str. USDA-ARS-USMARC-1735	2	2	0	0	0	2	0	0	0
NC_012673.1	360911	Exiguobacterium sp. AT1b	2	2	0	0	0	2	0	0	0
NC_013441.1	526226	Gordonia bronchialis DSM 43247	4	4	0	0	0	4	0	0	0
NC_021351.1	1232381	Corynebacterium glutamicum SCgG1	2	2	0	0	0	1	0	0	0
NZ_AP014565.1	996633	Salmonella enterica subsp. enterica serovar Typhimurium str. L-3553	4	3	0	1	0	3	0	1	0
NC_009436.1	399742	Enterobacter sp. 638	2	2	0	0	0	2	0	0	0
NZ_AP014683.1	1469502	Burkholderiales bacterium GJ-E10	0	0	0	0	0	0	0	0	0
NC_008531.1	203120	Leuconostoc mesenteroides subsp. mesenteroides ATCC 8293	1	1	0	0	0	1	0	0	0
NC_011852.1	557723	Haemophilus parasuis SH0165	1	1	0	0	0	1	0	0	0
NC_002505.1	243277	Vibrio cholerae O1 biovar El Tor str. N16961	4	4	0	0	0	4	0	0	0
NZ_CP009751.1	743277	Bordetella pertussis B1917	0	0	0	0	0	0	0	0	0
NC_004061.1	198804	Buchnera aphidicola str. Sg (Schizaphis graminum)	0	0	0	0	0	0	0	0	0
NC_010117.1	360115	Coxiella burnetii RSA 331	3	3	0	0	0	3	0	0	0
NC_017954.1	1184251	Thermogladius cellulolyticus 1633	0	0	0	0	0	0	0	0	0
NC_015945.1	886377	Muricauda ruestringensis DSM 13258	3	3	0	0	0	3	0	0	0
NC_011831.1	326427	Chloroflexus aggregans DSM 9485	5	4	0	0	0	4	0	0	0
NZ_CP008711.1	13373	Burkholderia mallei	3	3	0	0	0	0	0	0	0
NC_002607.1	64091	Halobacterium sp. NRC-1	1	1	0	0	0	1	0	0	0
NC_014006.1	452662	Sphingobium japonicum UT26S	4	4	0	0	0	3	0	0	0
NC_018013.1	746697	Aequorivita sublithincola DSM 14238	4	4	0	0	0	4	0	0	0
NZ_CP011295.1	1833	Rhodococcus erythropolis	3	2	0	0	0	2	0	0	0
NC_015663.1	1028307	Enterobacter aerogenes KCTC 2190	1	1	0	0	0	1	0	0	0
NZ_CP010850.1	29461	Brucella suis	0	0	0	0	0	0	0	0	0
NZ_CP011618.1	571	Klebsiella oxytoca	4	2	0	0	0	2	0	0	0
NC_007297.2	293653	Streptococcus pyogenes MGAS5005	0	0	0	0	0	0	0	0	0
NC_016811.1	933093	Legionella pneumophila subsp. pneumophila ATCC 43290	2	2	0	0	0	2	0	0	0
NC_018491.1	1217984	Bacillus cereus FRI-35	4	4	0	0	0	3	0	0	0
NZ_CP012372.1	543737	Francisella tularensis subsp. tularensis MA00-2987	2	1	0	0	0	1	0	0	0
NZ_CP009524.1	1434099	Methanosarcina sp. Kolksee	4	4	0	0	0	2	0	0	0
NC_017763.1	1074252	Staphylococcus aureus subsp. aureus HO 5096 0412	3	3	0	0	0	3	0	0	0
NZ_CP007055.1	797299	Halostagnicola larsenii XH-48	3	2	0	0	0	2	0	0	0
NC_016633.1	158190	Sphaerochaeta pleomorpha str. Grapes	4	4	0	0	0	4	0	0	0
NC_013406.1	481743	Paenibacillus sp. Y412MC10	1	1	0	0	0	1	0	0	0
NC_015311.1	767031	Prevotella denticola F0289	0	0	0	0	0	0	0	0	0
NZ_LN794158.1	1581680	Candidatus Methylopumilus turicensis	0	0	0	0	0	0	0	0	0
NZ_CP011956.1	129394	Xanthomonas oryzae pv. oryzicola	4	4	0	0	0	4	0	0	0
NC_005364.2	272632	Mycoplasma mycoides subsp. mycoides SC str. PG1	1	0	0	0	0	0	0	0	0
NZ_CP009613.1	319705	Mycobacterium abscessus subsp. bolletii	3	3	0	0	0	3	0	0	0
NZ_CP007477.1	1249654	Ehrlichia chaffeensis str. Osceola	1	1	0	0	0	1	0	0	0
NZ_CP010539.1	1213463	Mycoplasma pneumoniae 19294	0	0	0	0	0	0	0	0	0
NC_017279.1	567106	Campylobacter jejuni subsp. jejuni IA3902	3	3	0	0	0	1	0	0	0
NC_017238.1	390236	Borrelia afzelii PKo	3	3	0	0	0	3	0	0	0
NC_008596.1	246196	Mycobacterium smegmatis str. MC2 155	2	2	0	0	0	2	0	0	0
NZ_CP009042.1	686	Vibrio cholerae O1 biovar El Tor	4	4	0	0	0	4	0	0	0
NC_002528.1	107806	Buchnera aphidicola str. APS (Acyrthosiphon pisum)	3	3	0	0	0	3	0	0	0
NC_022606.1	1266845	Carnobacterium inhibens subsp. gilichinskyi	1	1	0	0	0	1	0	0	0
NZ_CP010890.1	1280	Staphylococcus aureus	2	2	0	0	0	2	0	0	0
NZ_CP013334.1	1307444	Fusobacterium hwasookii ChDC F300	0	0	0	0	0	0	0	0	0
NC_013162.1	521097	Capnocytophaga ochracea DSM 7271	2	2	0	0	0	1	0	0	0
NC_009523.1	357808	Roseiflexus sp. RS-1	7	6	0	0	0	6	0	0	0
NZ_CP007666.1	261591	Bacillus anthracis str. Vollum	8	8	0	0	0	0	0	0	0
NC_009954.1	397948	Caldivirga maquilingensis IC-167	1	1	0	0	0	1	0	0	0
NC_010742.1	430066	Brucella abortus S19	3	3	0	0	0	0	0	0	0
NZ_CP009464.1	1392	Bacillus anthracis	3	3	0	0	0	0	0	0	0
NC_017080.1	1142394	Phycisphaera mikurensis NBRC 102666	3	3	0	0	0	3	0	0	0
NC_008817.1	167542	Prochlorococcus marinus str. MIT 9515	3	3	0	0	0	3	0	0	0
NZ_CP008921.1	1214179	Streptococcus suis 6407	1	1	0	0	0	1	0	0	0
NZ_LN868200.1	470	Acinetobacter baumannii	3	3	0	0	0	3	0	0	0
NZ_CP007067.1	1033991	Rhizobium leguminosarum bv. trifolii CB782	4	4	0	0	0	4	0	0	0
NZ_CP006692.1	1382510	Salmonella bongori serovar 48:z41:-- str. RKS3044	1	1	0	0	0	0	0	0	0
NC_014625.1	880591	Ketogulonicigenium vulgare Y25	3	2	0	0	0	2	0	0	0
NC_014125.1	423212	Legionella pneumophila 2300/99 Alcoy	0	0	0	0	0	0	0	0	0
NC_002944.2	262316	Mycobacterium avium subsp. paratuberculosis K-10	3	3	0	0	0	3	0	0	0
NZ_CP010954.1	484429	Sphingobium sp. YBL2	5	4	0	0	0	4	0	0	0
NZ_CP009631.1	1449978	Burkholderia vietnamiensis LMG 10929	8	8	0	0	0	3	0	1	0
NZ_CP011456.1	1647413	Anabaena sp. wa102	6	6	0	0	0	5	0	0	0
NC_020945.1	1071773	Chlamydia trachomatis L2b/8200/07	1	1	0	0	0	1	0	0	0
NC_017504.1	722438	Mycoplasma pneumoniae FH	1	1	0	0	0	1	0	0	0
NZ_CP009607.1	1450527	Francisella tularensis subsp. novicida D9876	3	3	0	0	0	2	0	0	0
NC_014391.1	644283	Micromonospora aurantiaca ATCC 27029	6	5	0	0	0	2	0	0	0
NZ_CP009704.1	632	Yersinia pestis	6	5	0	0	0	0	0	0	0
NZ_CP007420.1	1412458	Salmonella enterica subsp. enterica serovar Enteritidis str. EC20100103	5	5	0	0	0	5	0	0	0
NC_005043.1	182082	Chlamydophila pneumoniae TW-183	1	1	0	0	0	1	0	0	0
NC_011999.1	458233	Macrococcus caseolyticus JCSC5402	1	1	0	0	0	1	0	0	0
NC_017094.1	1162668	Leptospirillum ferrooxidans C2-3	3	2	0	0	0	2	0	0	0
NZ_CP009092.1	149539	Salmonella enterica subsp. enterica serovar Enteritidis	5	5	0	0	0	5	0	0	0
NC_017045.1	693978	Riemerella anatipestifer ATCC 11845 = DSM 15868	2	1	0	0	0	1	0	0	0
NC_021291.1	1260251	Spiribacter salinus M19-40	3	2	0	0	0	2	0	0	0
NC_021838.1	1639	Listeria monocytogenes	0	0	0	0	0	0	0	0	0
NC_017735.1	1163745	Helicobacter cetorum MIT 99-5656	0	0	0	0	0	0	0	0	0
NC_000922.1	115713	Chlamydophila pneumoniae CWL029	1	1	0	0	0	1	0	0	0
NC_017621.1	1004952	Streptococcus suis D12	1	1	0	0	0	1	0	0	0
NC_021659.1	1348660	Serratia plymuthica S13	4	3	0	0	0	3	0	0	0
NC_002162.1	273119	Ureaplasma parvum serovar 3 str. ATCC 700970	0	0	0	0	0	0	0	0	0
NC_010322.1	76869	Pseudomonas putida GB-1	5	5	0	0	0	5	0	0	0
NC_015722.1	696127	Candidatus Midichloria mitochondrii IricVA	1	1	0	0	0	1	0	0	0
NZ_CP007633.1	126738	Thermotoga sp. RQ7	1	0	0	0	0	0	0	0	0
NC_022905.1	1423891	Brucella ceti TE10759-12	3	3	0	0	0	0	0	0	0
NZ_CP012148.1	1597	Lactobacillus paracasei	0	0	0	0	0	0	0	0	0
NZ_CP004117.1	1249662	Burkholderia thailandensis E444	6	6	0	0	0	4	0	0	0
NC_018419.1	1199245	secondary endosymbiont of Ctenarytaina eucalypti	0	0	0	0	0	0	0	0	0
NC_012560.1	322710	Azotobacter vinelandii DJ	3	3	0	0	0	3	0	0	0
NZ_CP009706.1	1453496	Hafnia alvei FB1	2	2	0	0	0	2	0	0	0
NC_017249.1	1037409	Bradyrhizobium japonicum USDA 6	8	8	0	0	0	7	0	0	0
NZ_CBVU010000001.1	1407064	Erwinia amylovora LA637	0	0	0	0	0	0	0	0	0
NC_008740.1	351348	Marinobacter hydrocarbonoclasticus VT8	2	2	0	0	0	2	0	0	0
NZ_CP013106.1	1178482	Halomonas huangheensis	6	6	0	0	0	6	0	0	0
NZ_CP012070.1	1658671	Arsenicicoccus sp. oral taxon 190	3	3	0	0	0	3	0	0	0
NZ_CP008852.1	484770	Pelosinus sp. UFO1	4	3	0	0	0	3	0	0	0
NC_008698.1	368408	Thermofilum pendens Hrk 5	5	5	0	0	0	5	0	0	0
NC_011658.1	405534	Bacillus cereus AH187	3	3	0	0	0	3	0	0	0
NC_017453.1	510831	Francisella tularensis subsp. tularensis NE061598	3	2	0	0	0	2	0	0	0
NC_014207.1	666681	Methylotenera versatilis 301	2	2	0	0	0	2	0	0	0
NC_020063.1	693444	Enterobacteriaceae bacterium strain FGI 57	0	0	0	0	0	0	0	0	0
NC_009901.1	398579	Shewanella pealeana ATCC 700345	3	3	0	0	0	3	0	0	0
NC_014830.1	710696	Intrasporangium calvum DSM 43043	1	1	0	0	0	1	0	0	0
NZ_CP011051.1	1423	Bacillus subtilis	4	3	0	0	0	3	0	0	0
NC_008346.1	335541	Syntrophomonas wolfei subsp. wolfei str. Goettingen G311	2	2	0	0	0	2	0	0	0
NC_021879.1	1184253	Anaplasma phagocytophilum str. HZ2	3	2	0	0	0	2	0	0	0
NC_010994.1	491916	Rhizobium etli CIAT 652	3	3	0	0	0	3	0	0	0
NZ_ABIZ01000001.1	240016	Verrucomicrobium spinosum DSM 4136 = JCM 18804	4	4	0	0	0	4	0	0	0
NC_017513.1	935599	Neisseria meningitidis G2136	0	0	0	0	0	0	0	0	0
NZ_CP009227.1	1539298	Treponema sp. OMZ 838	0	0	0	0	0	0	0	0	0
NC_016593.1	1111068	Geobacillus thermoleovorans CCB_US3_UF5	2	2	0	0	0	0	0	0	0
NZ_CP007035.1	929713	Niabella soli DSM 19437	3	3	0	0	0	3	0	0	0
NC_010655.1	349741	Akkermansia muciniphila ATCC BAA-835	1	1	0	0	0	1	0	0	0
NC_011663.1	407976	Shewanella baltica OS223	5	5	0	0	0	5	0	0	0
NZ_CP009104.1	562	Escherichia coli	1	1	0	0	0	1	0	0	0
NC_022442.1	1201010	Staphylococcus aureus subsp. aureus SA957	1	1	0	0	0	1	0	0	0
NC_009455.1	216389	Dehalococcoides mccartyi BAV1	0	0	0	0	0	0	0	0	0
NC_020125.1	1271752	Riemerella anatipestifer RA-CH-2	0	0	0	0	0	0	0	0	0
NC_018018.1	880071	Flexibacter litoralis DSM 6794	1	1	0	0	0	1	0	0	0
NC_010287.1	471472	Chlamydia trachomatis 434/Bu	0	0	0	0	0	0	0	0	0
NC_017048.1	1105098	Rickettsia prowazekii str. GvV257	1	1	0	0	0	1	0	0	0
NZ_CP008905.1	1333849	Enterobacter cloacae ECR091	2	2	0	0	0	2	0	0	0
NZ_CP007051.1	694431	Desulfurella acetivorans A63	0	0	0	0	0	0	0	0	0
NC_018528.1	880633	Lactobacillus helveticus R0052	0	0	0	0	0	0	0	0	0
NC_010717.2	360094	Xanthomonas oryzae pv. oryzae PXO99A	5	4	0	0	0	4	0	0	0
NC_015259.1	991905	Polymorphum gilvum SL003B-26A1	0	0	0	0	0	0	0	0	0
NC_008571.1	411154	Gramella forsetii KT0803	2	2	0	0	0	2	0	0	0
NC_020300.1	1094489	Bartonella australis Aust/NH1	0	0	0	0	0	0	0	0	0
NC_007705.1	342109	Xanthomonas oryzae pv. oryzae MAFF 311018	8	8	0	0	0	7	0	0	0
NC_015684.1	504832	Oligotropha carboxidovorans OM5	0	0	0	0	0	0	0	0	0
NZ_CP010433.1	28025	Bifidobacterium animalis	3	3	0	0	0	3	0	0	0
NZ_CP008704.1	13373	Burkholderia mallei	5	5	0	0	0	1	0	1	0
NC_017911.1	1037911	Pseudomonas fluorescens A506	7	7	0	0	0	7	0	0	0
NC_012704.1	645127	Corynebacterium kroppenstedtii DSM 44385	1	1	0	0	0	1	0	0	0
NZ_CP006911.1	1125411	Candidatus Thioglobus singularis PS1	3	3	0	0	0	3	0	0	0
NC_018011.1	679935	Alistipes finegoldii DSM 17242	2	2	0	0	0	2	0	0	0
NC_009663.1	387093	Sulfurovum sp. NBC37-1	2	2	0	0	0	2	0	0	0
NC_017308.1	1087454	Corynebacterium pseudotuberculosis 1/06-A	2	2	0	0	0	2	0	0	0
NZ_CP007495.1	1172205	Bordetella holmesii 44057	3	3	0	0	0	3	0	0	0
NC_007168.1	279808	Staphylococcus haemolyticus JCSC1435	1	1	0	0	0	1	0	0	0
NZ_CP010298.1	1280	Staphylococcus aureus	0	0	0	0	0	0	0	0	0
NC_013282.2	693216	Siccibacter turicensis z3032	2	1	0	1	0	1	0	1	0
NZ_CP011574.1	548	Enterobacter aerogenes	2	2	0	0	0	2	0	0	0
NC_015474.1	342949	Pyrococcus sp. NA2	1	1	0	0	0	1	0	0	0
NC_014934.1	688270	Cellulophaga algicola DSM 14237	4	3	0	0	0	3	0	0	0
NZ_CP012359.1	1697052	Pseudomonadaceae bacterium C6819	0	0	0	0	0	0	0	0	0
NZ_CP013146.1	1719	Corynebacterium pseudotuberculosis	0	0	0	0	0	0	0	0	0
NC_010079.1	451516	Staphylococcus aureus subsp. aureus USA300_TCH1516	2	1	0	0	0	1	0	0	0
NC_020509.1	1248726	Helicobacter pylori OK310	0	0	0	0	0	0	0	0	0
NC_015563.1	742013	Delftia sp. Cs1-4	7	5	0	0	0	4	0	0	0
NC_021744.1	326425	Lactobacillus helveticus CNRZ32	4	4	0	0	0	4	0	0	0
NC_012779.2	634503	Edwardsiella ictaluri 93-146	0	0	0	0	0	0	0	0	0
NZ_CP010541.1	1263758	Mycoplasma pneumoniae 51494	2	2	0	0	0	2	0	0	0
NZ_CP009997.1	28152	Yersinia kristensenii	8	7	0	0	0	0	0	0	0
NZ_CP002427.1	767456	Lactobacillus helveticus H9	2	2	0	0	0	2	0	0	0
NC_007335.2	59920	Prochlorococcus marinus str. NATL2A	1	1	0	0	0	1	0	0	0
NC_018140.1	91891	Legionella pneumophila subsp. pneumophila	0	0	0	0	0	0	0	0	0
NZ_HG969191.1	38323	Bartonella henselae	2	2	0	0	0	2	0	0	0
NC_014212.1	526227	Meiothermus silvanus DSM 9946	2	2	0	0	0	2	0	0	0
NC_009675.1	404589	Anaeromyxobacter sp. Fw109-5	3	2	0	0	0	2	0	0	0
NC_015571.1	1030843	Porphyromonas gingivalis TDC60	0	0	0	0	0	0	0	0	0
NC_016612.1	1006551	Klebsiella oxytoca KCTC 1686	5	5	0	0	0	5	0	0	0
NC_009440.1	399549	Metallosphaera sedula DSM 5348	4	3	0	0	0	3	0	0	0
NC_012108.1	177437	Desulfobacterium autotrophicum HRM2	5	5	0	0	0	5	0	0	0
NC_012438.1	204536	Sulfurihydrogenibium azorense Az-Fu1	4	3	0	0	0	3	0	0	0
NZ_CP009925.1	813	Chlamydia trachomatis	0	0	0	0	0	0	0	0	0
NZ_CP012252.1	244366	Klebsiella variicola	3	3	0	0	0	0	0	0	0
NC_000961.1	70601	Pyrococcus horikoshii OT3	0	0	0	0	0	0	0	0	0
NZ_CP004388.1	1123366	Thalassospira xiamenensis M-5 = DSM 17429	3	3	0	0	0	3	0	0	0
NZ_AP014680.1	1193095	Lactobacillus hokkaidonensis	1	1	0	0	0	1	0	0	0
NC_021834.1	1338035	Campylobacter jejuni 32488	1	1	0	0	0	1	0	0	0
NZ_CP007581.1	90371	Salmonella enterica subsp. enterica serovar Typhimurium	2	2	0	0	0	2	0	0	0
NZ_CP011254.1	47917	Serratia fonticola	2	2	0	0	0	2	0	0	0
NC_020966.1	1071753	Chlamydia trachomatis A/363	0	0	0	0	0	0	0	0	0
NZ_CP008804.1	480	Moraxella catarrhalis	1	1	0	0	0	1	0	0	0
NC_011884.1	395961	Cyanothece sp. PCC 7425	3	3	0	0	0	3	0	0	0
NC_012962.1	291112	Photorhabdus asymbiotica	4	4	0	0	0	4	0	0	0
NC_019745.1	1173026	Gloeocapsa sp. PCC 7428	4	4	0	0	0	4	0	0	0
NZ_CP007763.1	224914	Brucella melitensis bv. 1 str. 16M	4	4	0	0	0	0	0	0	0
NZ_CP010432.1	1579	Lactobacillus acidophilus	0	0	0	0	0	0	0	0	0
NC_008369.1	393011	Francisella tularensis subsp. holarctica OSU18	0	0	0	0	0	0	0	0	0
NC_012687.1	672161	Chlamydia trachomatis B/TZ1A828/OT	0	0	0	0	0	0	0	0	0
NZ_CP007032.1	871968	Desulfitobacterium metallireducens DSM 15288	2	2	0	0	0	2	0	0	0
NC_020291.1	931276	Clostridium saccharoperbutylacetonicum N1-4(HMT)	2	2	0	0	0	2	0	0	0
NC_021900.1	1076934	Streptococcus lutetiensis 033	1	1	0	0	0	1	0	0	0
NZ_CP009693.1	119857	Francisella tularensis subsp. holarctica	3	2	0	0	0	1	0	0	0
NC_015856.1	1005048	Collimonas fungivorans Ter331	4	4	0	0	0	3	0	0	0
NC_013418.2	600809	Blattabacterium sp. (Periplaneta americana) str. BPLAN	1	1	0	0	0	1	0	0	0
NC_020453.1	1245469	Bradyrhizobium oligotrophicum S58	5	4	0	0	0	4	0	0	0
NZ_CP012022.1	1719	Corynebacterium pseudotuberculosis	2	2	0	0	0	2	0	0	0
NC_021726.1	1096995	Acinetobacter baumannii BJAB07104	1	1	0	0	0	1	0	0	0
NZ_CP009101.1	1773	Mycobacterium tuberculosis	4	4	0	0	0	0	0	0	0
NC_009512.1	351746	Pseudomonas putida F1	3	2	0	0	0	2	0	0	0
NZ_CP007563.1	1163752	Candidatus Portiera aleyrodidarum MED (Bemisia tabaci)	0	0	0	0	0	0	0	0	0
NZ_CP007332.1	1412570	Salmonella enterica subsp. enterica serovar Enteritidis str. EC20120916	4	3	0	0	0	3	0	0	0
NZ_CP009753.1	1133671	Francisella tularensis subsp. tularensis WY-00W4114	3	3	0	0	0	2	0	0	0
NZ_CP011955.1	129394	Xanthomonas oryzae pv. oryzicola	1	1	0	0	0	1	0	0	0
NZ_CP009559.1	54388	Salmonella enterica subsp. enterica serovar Paratyphi A	5	4	0	0	0	4	0	0	0
NC_018485.1	187303	Methylocystis sp. SC2	3	3	0	0	0	3	0	0	0
NZ_AFRZ01000001.1	929558	Sulfurimonas gotlandica GD1	1	0	0	0	0	0	0	0	0
NC_016914.1	1105100	Rickettsia rickettsii str. Hino	0	0	0	0	0	0	0	0	0
NC_015676.1	679901	Methanosalsum zhilinae DSM 4017	3	3	0	0	0	3	0	0	0
NC_002946.2	242231	Neisseria gonorrhoeae FA 1090	2	2	0	0	0	1	0	0	0
NZ_AGIY02000001.1	882090	Methanolinea tarda NOBI-1	4	4	0	0	0	4	0	0	0
NZ_CP012171.1	1690248	Arthrobacter sp. LS16	1	1	0	0	0	1	0	0	0
NZ_CP009091.1	149539	Salmonella enterica subsp. enterica serovar Enteritidis	0	0	0	0	0	0	0	0	0
NC_009725.1	326423	Bacillus methylotrophicus FZB42	4	3	0	0	0	1	0	0	0
NZ_CP011347.1	492670	Bacillus methylotrophicus	1	1	0	0	0	0	0	0	0
NC_022441.1	1234369	Chlamydia pecorum P787	1	1	0	0	0	1	0	0	0
NC_022198.1	1348662	Corynebacterium argentoratense DSM 44202	0	0	0	0	0	0	0	0	0
NC_012982.1	582402	Hirschia baltica ATCC 49814	3	3	0	0	0	3	0	0	0
NC_017309.1	718251	Edwardsiella tarda FL6-60	1	1	0	0	0	0	0	0	0
NC_017138.1	1006007	Bacillus megaterium WSH-002	4	4	0	0	0	4	0	0	0
NZ_CP010812.1	666	Vibrio cholerae	1	1	0	0	0	1	0	0	0
NC_013887.1	644281	Methanocaldococcus sp. FS406-22	0	0	0	0	0	0	0	0	0
NC_016605.1	701521	Pediococcus claussenii ATCC BAA-344	1	1	0	0	0	1	0	0	0
NC_014837.1	592316	Pantoea sp. At-9b	4	4	0	0	0	3	0	0	0
NC_010681.1	398527	Burkholderia phytofirmans PsJN	1	1	0	0	0	1	0	0	0
NC_012686.1	580049	Chlamydia trachomatis B/Jali20/OT	2	2	0	0	0	2	0	0	0
NZ_CP010361.1	573	Klebsiella pneumoniae	6	6	0	0	0	4	0	0	0
NZ_CP007027.1	1437856	Mycobacterium tuberculosis H37RvSiena	2	2	0	0	0	0	0	0	0
NC_022222.1	1392476	Staphylococcus aureus subsp. aureus 6850	1	1	0	0	0	1	0	0	0
NZ_CP010804.1	34021	Candidatus Liberibacter asiaticus	0	0	0	0	0	0	0	0	0
NZ_CP011931.1	214675	Leptospira interrogans serovar Manilae	1	1	0	0	0	1	0	0	0
NC_017254.1	713600	Buchnera aphidicola str. JF98 (Acyrthosiphon pisum)	2	2	0	0	0	2	0	0	0
NC_013422.1	555778	Halothiobacillus neapolitanus c2	0	0	0	0	0	0	0	0	0
NZ_CP006704.1	1392005	Comamonas testosteroni TK102	5	5	0	0	0	5	0	0	0
NC_009937.1	438753	Azorhizobium caulinodans ORS 571	1	1	0	0	0	1	0	0	0
NC_003030.1	272562	Clostridium acetobutylicum ATCC 824	2	2	0	0	0	2	0	0	0
NZ_CP008808.1	1240980	Campylobacter fetus subsp. fetus 04/554	0	0	0	0	0	0	0	0	0
NC_007946.1	364106	Escherichia coli UTI89	2	2	0	0	0	2	0	0	0
NZ_AP014595.1	931202	Candidatus Liberibacter asiaticus str. Ishi-1	0	0	0	0	0	0	0	0	0
NZ_CP006568.1	2342	Candidatus Sodalis pierantonius str. SOPE	4	3	0	0	0	3	0	0	0
NZ_CP007145.1	1227739	Hymenobacter swuensis DY53	5	5	0	0	0	5	0	0	0
NC_013851.1	572477	Allochromatium vinosum DSM 180	2	2	0	0	0	2	0	0	0
NC_013854.1	137722	Azospirillum sp. B510	6	5	0	0	0	5	0	0	0
NZ_ABCY02000001.1	445987	Borrelia valaisiana VS116	0	0	0	0	0	0	0	0	0
NC_011205.1	439851	Salmonella enterica subsp. enterica serovar Dublin str. CT_02021853	4	4	0	0	0	4	0	0	0
NC_015320.1	693661	Archaeoglobus veneficus SNP6	1	1	0	0	0	1	0	0	0
NZ_CP010571.1	813	Chlamydia trachomatis	0	0	0	0	0	0	0	0	0
NZ_CP009300.1	1454382	Bacillus cereus D17	3	2	0	0	0	1	0	0	0
NZ_CP007245.1	1412470	Salmonella enterica subsp. enterica serovar Enteritidis str. EC20120008	5	5	0	0	0	5	0	0	0
NC_021084.1	1236908	Wolbachia endosymbiont of Drosophila simulans wNo	0	0	0	0	0	0	0	0	0
NC_012488.1	568819	Listeria monocytogenes serotype 4b str. CLIP 80459	2	2	0	0	0	1	0	0	0
NZ_CP011770.1	1348774	Croceicoccus naphthovorans	2	2	0	0	0	2	0	0	0
NC_010816.1	205913	Bifidobacterium longum DJO10A	1	1	0	0	0	1	0	0	0
NC_006834.1	291331	Xanthomonas oryzae pv. oryzae KACC 10331	2	2	0	0	0	2	0	0	0
NC_020888.1	1298593	Thalassolituus oleivorans MIL-1	5	5	0	0	0	5	0	0	0
NZ_CP006965.1	582419	Thermococcus paralvinellae	1	1	0	0	0	1	0	0	0
NC_016856.1	588858	Salmonella enterica subsp. enterica serovar Typhimurium str. 14028S	3	2	0	0	0	2	0	0	0
NZ_CP008929.1	573	Klebsiella pneumoniae	4	1	0	0	0	1	0	0	0
NC_008347.1	394221	Maricaulis maris MCS10	1	1	0	0	0	1	0	0	0
NC_011593.1	391904	Bifidobacterium longum subsp. infantis ATCC 15697 = JCM 1222 = DSM 20088	1	1	0	0	0	1	0	0	0
NC_018720.1	1147128	Bifidobacterium asteroides PRL2011	2	2	0	0	0	2	0	0	0
NC_016641.1	985665	Paenibacillus terrae HPL-003	4	4	0	0	0	4	0	0	0
NZ_CP007699.1	1403539	Streptomyces lydicus A02	4	2	0	0	0	2	0	0	0
NZ_CP011790.1	149539	Salmonella enterica subsp. enterica serovar Enteritidis	7	6	0	0	0	6	0	0	0
NZ_CP011394.1	696867	Salmonella enterica subsp. enterica serovar Enteritidis str. 18569	3	3	0	0	0	3	0	0	0
NC_014370.1	553174	Prevotella melaninogenica ATCC 25845	3	3	0	0	0	2	0	0	0
NZ_CP009598.1	1449979	Bacillus anthracis str. V770-NP-1R	6	6	0	0	0	1	0	0	0
NC_018609.1	1228997	Riemerella anatipestifer RA-CH-1	3	3	0	0	0	3	0	0	0
NC_016795.1	1104320	Brucella abortus A13334	1	1	0	0	0	0	0	0	0
NC_016627.1	720554	[Clostridium] clariflavum DSM 19732	1	1	0	0	0	1	0	0	0
NZ_AP014573.1	1445606	Mycobacterium tuberculosis str. Kurono	1	1	0	0	0	0	0	0	0
NC_017056.1	1105096	Rickettsia prowazekii str. BuV67-CWPP	0	0	0	0	0	0	0	0	0
NC_010471.1	349519	Leuconostoc citreum KM20	0	0	0	0	0	0	0	0	0
NZ_CP011371.1	413882	[Polyangium] brachysporum	0	0	0	0	0	0	0	0	0
NC_017526.1	1081095	Legionella pneumophila subsp. pneumophila str. Hextuple_3a	2	2	0	0	0	2	0	0	0
NZ_CP009043.1	1244531	Campylobacter iguaniorum	1	1	0	0	0	1	0	0	0
NC_017846.1	694569	Aggregatibacter actinomycetemcomitans D7S-1	2	2	0	0	0	2	0	0	0
NC_021284.1	1276229	Spiroplasma syrphidicola EA-1	0	0	0	0	0	0	0	0	0
NC_012892.2	469008	Escherichia coli BL21(DE3)	5	3	0	0	0	3	0	0	0
NC_012588.1	427317	Sulfolobus islandicus M.14.25	2	2	0	0	0	2	0	0	0
NC_021880.1	1173064	Anaplasma phagocytophilum str. JM	0	0	0	0	0	0	0	0	0
NC_014217.1	639283	Starkeya novella DSM 506	3	3	0	0	0	3	0	0	0
NC_017436.1	759364	Chlamydia trachomatis D-LC	1	1	0	0	0	1	0	0	0
NZ_AGTD01000001.1	1050617	Escherichia coli UMNF18	4	0	0	0	0	0	0	0	0
NZ_CP010778.1	1452	Bacillus atrophaeus	5	5	0	0	0	5	0	0	0
NC_014225.1	716544	Waddlia chondrophila WSU 86-1044	3	3	0	0	0	3	0	0	0
NZ_CP009968.1	288681	Bacillus cereus E33L	2	2	0	0	0	1	0	0	0
NC_016010.1	981368	Xanthomonas axonopodis pv. citrumelo F1	5	5	0	0	0	2	0	0	0
NC_013062.1	531844	Flavobacteriaceae bacterium 3519-10	0	0	0	0	0	0	0	0	0
NC_013892.1	406818	Xenorhabdus bovienii SS-2004	0	0	0	0	0	0	0	0	0
NC_021004.1	869312	Streptococcus pneumoniae SPN033038	1	1	0	0	0	0	0	0	0
NZ_CP006820.1	1382920	Helicobacter pylori oki102	0	0	0	0	0	0	0	0	0
NC_021721.1	1318635	Lactobacillus casei LOCK919	2	2	0	0	0	0	0	0	0
NC_011420.2	414684	Rhodospirillum centenum SW	1	1	0	0	0	1	0	0	0
NC_019896.1	1192196	Bacillus subtilis subsp. subtilis str. BSP1	1	1	0	0	0	0	0	0	0
NC_017374.1	985081	Helicobacter pylori 2017	0	0	0	0	0	0	0	0	0
NC_002516.2	208964	Pseudomonas aeruginosa PAO1	7	6	0	0	0	6	0	0	0
NC_015673.1	662755	Corynebacterium resistens DSM 45100	1	1	0	0	0	1	0	0	0
NC_008782.1	232721	Acidovorax sp. JS42	4	4	0	0	0	4	0	0	0
NZ_CP012300.1	72407	Klebsiella pneumoniae subsp. pneumoniae	2	2	0	0	0	0	0	0	0
NZ_CP009448.1	562971	Achromobacter xylosoxidans C54	2	2	0	0	0	2	0	0	0
NC_000907.1	71421	Haemophilus influenzae Rd KW20	0	0	0	0	0	0	0	0	0
NZ_CP010049.1	1505597	Blochmannia endosymbiont of Camponotus (Colobopsis) obliquus	0	0	0	0	0	0	0	0	0
NZ_AP014648.1	1384459	Methyloceanibacter caenitepidi	3	3	0	0	0	3	0	0	0
NC_021237.1	1124983	Pseudomonas protegens CHA0	2	2	0	0	0	2	0	0	0
NZ_CP009976.1	1348584	Cellulophaga baltica 18	2	2	0	0	0	2	0	0	0
NC_009348.1	382245	Aeromonas salmonicida subsp. salmonicida A449	1	1	0	0	0	1	0	0	0
NC_016943.1	1146883	Blastococcus saxobsidens DD2	4	4	0	0	0	4	0	0	0
NC_017042.1	1105113	Rickettsia rhipicephali str. 3-7-female6-CWPP	0	0	0	0	0	0	0	0	0
NC_022600.1	1183438	Gloeobacter kilaueensis JS1	6	6	0	0	0	6	0	0	0
NC_013203.1	521095	Atopobium parvulum DSM 20469	0	0	0	0	0	0	0	0	0
NC_017075.1	983917	Rubrivivax gelatinosus IL144	3	3	0	0	0	3	0	0	0
NC_021353.1	1295009	Candidatus Methanomassiliicoccus intestinalis Issoire-Mx1	3	2	0	0	0	2	0	0	0
NZ_HG004426.1	688354	Campylobacter fetus subsp. venerealis str. 84-112	1	1	0	0	0	1	0	0	0
NZ_CP006908.1	1408283	Clostridium botulinum CDC_1436	3	3	0	0	0	3	0	0	0
NZ_CP011512.1	59893	Paenibacillus peoriae	2	2	0	0	0	1	0	0	0
NZ_CP012126.1	562	Escherichia coli	6	3	0	0	0	3	0	0	0
NC_014408.1	79929	Methanothermobacter marburgensis str. Marburg	0	0	0	0	0	0	0	0	0
NC_007958.1	316057	Rhodopseudomonas palustris BisB5	4	4	0	0	0	4	0	0	0
NZ_ABYG01000001.1	564419	Chlamydia trachomatis 70s	1	1	0	0	0	1	0	0	0
NC_004829.2	710127	Mycoplasma gallisepticum str. R(low)	0	0	0	0	0	0	0	0	0
NC_018642.1	882094	Listeria monocytogenes L312	1	1	0	0	0	1	0	0	0
NC_016012.1	1041504	Candidatus Arthromitus sp. SFB-rat-Yit	1	1	0	0	0	1	0	0	0
NC_014762.1	709032	Sulfuricurvum kujiense DSM 16994	3	3	0	0	0	3	0	0	0
NC_021915.1	1224163	Corynebacterium maris DSM 45190	1	1	0	0	0	1	0	0	0
NC_007292.1	291272	Candidatus Blochmannia pennsylvanicus str. BPEN	0	0	0	0	0	0	0	0	0
NC_013061.1	485917	Pedobacter heparinus DSM 2366	0	0	0	0	0	0	0	0	0
NC_002978.6	163164	Wolbachia endosymbiont of Drosophila melanogaster	0	0	0	0	0	0	0	0	0
NC_011080.1	423368	Salmonella enterica subsp. enterica serovar Newport str. SL254	5	4	0	0	0	3	0	0	0
NC_012563.1	536232	Clostridium botulinum A2 str. Kyoto	2	2	0	0	0	2	0	0	0
NC_020246.1	1028566	Sulfolobus acidocaldarius N8	2	2	0	0	0	2	0	0	0
NZ_CP007329.2	1412466	Salmonella enterica subsp. enterica serovar Enteritidis str. EC20120002	2	2	0	0	0	2	0	0	0
NZ_CP007576.1	1418107	Aeromonas hydrophila pc104A	4	4	0	0	0	4	0	0	0
NC_015057.1	1198114	Granulicella tundricola MP5ACTX9	3	3	0	0	0	3	0	0	0
NC_017061.1	1155777	Bacillus methylotrophicus YAU B9601-Y2	2	2	0	0	0	1	0	0	0
NC_008319.1	64471	Synechococcus sp. CC9311	1	1	0	0	0	1	0	0	0
NC_022794.1	1399115	Exiguobacterium sp. MH3	4	4	0	0	0	4	0	0	0
NC_015434.1	263358	Verrucosispora maris AB-18-032	5	5	0	0	0	5	0	0	0
NC_008148.1	266117	Rubrobacter xylanophilus DSM 9941	5	5	0	0	0	5	0	0	0
NC_011060.1	324925	Pelodictyon phaeoclathratiforme BU-1	2	2	0	0	0	2	0	0	0
NC_013355.1	622759	Zymomonas mobilis subsp. mobilis NCIMB 11163	1	1	0	0	0	1	0	0	0
NZ_LN846980.1	83558	Chlamydia pneumoniae	1	1	0	0	0	1	0	0	0
NC_015730.1	391595	Roseobacter litoralis Och 149	1	1	0	0	0	1	0	0	0
NC_011772.1	405531	Bacillus cereus G9842	2	2	0	0	0	1	0	0	0
NZ_CP006019.1	1343739	Palaeococcus pacificus DY20341	1	1	0	0	0	1	0	0	0
NC_011296.1	289376	Thermodesulfovibrio yellowstonii DSM 11347	2	2	0	0	0	2	0	0	0
NZ_CP006010.1	1337396	Rickettsia rickettsii str. Morgan	1	1	0	0	0	1	0	0	0
NC_009342.1	340322	Corynebacterium glutamicum R	0	0	0	0	0	0	0	0	0
NZ_CM001161.1	992186	Rhodobacter sphaeroides WS8N	1	1	0	0	0	1	0	0	0
NC_008313.1	381666	Ralstonia eutropha H16	3	3	0	0	0	3	0	0	0
NC_004572.3	203267	Tropheryma whipplei str. Twist	0	0	0	0	0	0	0	0	0
NC_020247.1	1028567	Sulfolobus acidocaldarius Ron12/I	3	3	0	0	0	3	0	0	0
NC_022080.4	1345697	Geobacillus sp. JF8	2	2	0	0	0	2	0	0	0
NC_009487.1	359786	Staphylococcus aureus subsp. aureus JH9	3	3	0	0	0	3	0	0	0
NC_004344.2	36870	Wigglesworthia glossinidia endosymbiont of Glossina brevipalpis	0	0	0	0	0	0	0	0	0
NZ_CP007222.1	1454603	Salmonella enterica subsp. enterica serovar Montevideo str. USDA-ARS-USMARC-1903	2	2	0	0	0	2	0	0	0
NZ_CP009608.1	83560	Chlamydia muridarum	1	1	0	0	0	1	0	0	0
NC_012731.1	484021	Klebsiella pneumoniae subsp. pneumoniae NTUH-K2044	4	4	0	0	0	4	0	0	0
NZ_CP012648.1	1302	Streptococcus gordonii	1	1	0	0	0	1	0	0	0
NZ_CP009685.1	511145	Escherichia coli str. K-12 substr. MG1655	5	1	0	0	0	1	0	0	0
NC_011149.1	454166	Salmonella enterica subsp. enterica serovar Agona str. SL483	4	3	0	0	0	3	0	0	0
NC_021355.1	224719	Methanobrevibacter sp. AbM4	1	1	0	0	0	1	0	0	0
NC_009802.1	360104	Campylobacter concisus 13826	1	1	0	0	0	1	0	0	0
NC_004557.1	212717	Clostridium tetani E88	1	1	0	0	0	1	0	0	0
NZ_CP011786.1	1437605	Bifidobacterium actinocoloniiforme DSM 22766	1	1	0	0	0	1	0	0	0
NZ_CP009859.1	562	Escherichia coli	3	2	0	0	0	2	0	0	0
NZ_CP006636.1	1358422	Escherichia coli PCN061	7	2	0	0	0	2	0	0	0
NC_020832.1	1302650	Bacillus subtilis subsp. subtilis str. BAB-1	3	3	0	0	0	1	0	0	0
NC_018508.1	1217737	Bacillus thuringiensis HD-789	5	4	0	0	0	2	0	0	0
NC_019780.1	13035	Dactylococcopsis salina PCC 8305	1	0	0	0	0	0	0	0	0
NC_015733.1	1042876	Pseudomonas putida S16	3	3	0	0	0	0	0	0	0
NZ_CP007242.1	1292358	Bacillus amyloliquefaciens KHG19	1	1	0	0	0	0	0	0	0
NZ_CP012364.1	1698448	Pseudomonadaceae bacterium E1148	0	0	0	0	0	0	0	0	0
NZ_CP009614.1	44454	Mycobacterium avium subsp. avium	5	5	0	0	0	4	0	0	0
NZ_CP007607.1	570416	Bacillus thuringiensis serovar kurstaki str. YBT-1520	4	4	0	0	0	2	0	0	0
NZ_CP012681.1	90371	Salmonella enterica subsp. enterica serovar Typhimurium	3	3	0	0	0	3	0	0	0
NC_017353.1	1034809	Staphylococcus lugdunensis N920143	2	2	0	0	0	2	0	0	0
NZ_CP012332.1	1391653	Vulgatibacter incomptus	2	2	0	0	0	2	0	0	0
NZ_CP007570.1	1311	Streptococcus agalactiae	0	0	0	0	0	0	0	0	0
NZ_CP009961.1	1550241	Thermofilum sp. 1807-2	1	1	0	0	0	1	0	0	0
NC_018267.1	100901	Wolbachia endosymbiont of Onchocerca ochengi	1	1	0	0	0	1	0	0	0
NC_013037.1	471854	Dyadobacter fermentans DSM 18053	3	3	0	0	0	3	0	0	0
NC_002967.9	243275	Treponema denticola ATCC 35405	1	1	0	0	0	1	0	0	0
NZ_CP011396.1	935705	Salmonella enterica subsp. enterica serovar Thompson str. ATCC 8391	2	2	0	0	0	2	0	0	0
NZ_CP004023.1	1249474	Burkholderia pseudomallei MSHR511	4	2	0	1	0	0	0	1	0
NZ_CP009795.1	350701	Burkholderia dolosa AU0158	3	2	0	0	0	0	0	0	0
NZ_CP010803.1	1486262	Martelella endophytica	3	3	0	0	0	3	0	0	0
NZ_AP014510.1	1408160	Thermotoga profunda AZM34c06	1	1	0	0	0	1	0	0	0
NC_004113.1	197221	Thermosynechococcus elongatus BP-1	1	1	0	0	0	1	0	0	0
NC_014537.1	572478	Vulcanisaeta distributa DSM 14429	0	0	0	0	0	0	0	0	0
NZ_CP013021.1	680279	Agarivorans gilvus	4	4	0	0	0	4	0	0	0
NZ_CP011365.1	90371	Salmonella enterica subsp. enterica serovar Typhimurium	2	2	0	0	0	2	0	0	0
NC_011244.1	412418	Borrelia recurrentis A1	2	2	0	0	0	0	0	0	0
NC_016913.1	1105104	Rickettsia rickettsii str. Brazil	0	0	0	0	0	0	0	0	0
NC_018149.1	1197325	Mycoplasma wenyonii str. Massachusetts	0	0	0	0	0	0	0	0	0
NZ_CP009720.1	1428	Bacillus thuringiensis	3	3	0	0	0	0	0	0	0
NC_022665.1	1340847	Streptococcus suis T15	3	3	0	0	0	3	0	0	0
NZ_CP012187.1	1597	Lactobacillus paracasei	3	3	0	0	0	1	0	0	0
NC_005071.1	74547	Prochlorococcus marinus str. MIT 9313	5	5	0	0	0	5	0	0	0
NZ_CP011976.1	1284798	Klebsiella pneumoniae DMC1097	2	2	0	0	0	2	0	0	0
NC_022592.1	1341692	Clostridium autoethanogenum DSM 10061	4	4	0	0	0	2	0	0	0
NZ_CP007155.1	1449976	Kutzneria albida DSM 43870	7	7	0	0	0	7	0	0	0
NZ_CP006714.1	1385941	Bifidobacterium breve NCFB 2258	2	2	0	0	0	2	0	0	0
NZ_CP013219.1	264445	Streptomyces hygroscopicus subsp. limoneus	5	4	0	0	0	4	0	0	0
NZ_CP011070.1	1580092	Candidatus Nitrosopumilus sp. NF5	3	2	0	0	0	2	0	0	0
NC_018585.1	879088	Listeria monocytogenes SLCC2378	3	3	0	0	0	2	0	0	0
NC_017491.1	1088720	Lactobacillus rhamnosus ATCC 8530	0	0	0	0	0	0	0	0	0
NC_012483.1	240015	Acidobacterium capsulatum ATCC 51196	1	1	0	0	0	1	0	0	0
NZ_AP014524.1	1420885	Vibrio cholerae MS6	4	4	0	0	0	4	0	0	0
NZ_CP006741.1	1300227	Bifidobacterium longum subsp. longum GT15	1	1	0	0	0	1	0	0	0
NC_021885.1	669502	Candidatus Profftella armatura	1	0	0	0	0	0	0	0	0
NC_005835.1	262724	Thermus thermophilus HB27	1	1	0	0	0	1	0	0	0
NC_008769.1	410289	Mycobacterium bovis BCG str. Pasteur 1173P2	2	2	0	0	0	0	0	0	0
NC_014158.1	521096	Tsukamurella paurometabola DSM 20162	2	2	0	0	0	2	0	0	0
NZ_CP010028.1	1182571	Deinococcus swuensis	4	4	0	0	0	4	0	0	0
NC_010376.1	334413	Finegoldia magna ATCC 29328	0	0	0	0	0	0	0	0	0
NC_013532.1	574556	Anaplasma centrale str. Israel	3	3	0	0	0	1	0	0	0
NC_014539.1	640512	Burkholderia sp. CCGE1003	2	2	0	0	0	2	0	0	0
NC_019897.1	717605	Thermobacillus composti KWC4	3	3	0	0	0	3	0	0	0
NZ_CP011117.1	294	Pseudomonas fluorescens	7	6	0	0	0	4	0	0	0
NZ_CP011364.1	1578828	Edwardsiella sp. EA181011	1	1	0	0	0	0	0	0	0
NC_010501.1	390235	Pseudomonas putida W619	5	4	0	0	0	4	0	0	0
NC_020059.1	698761	Rhizobium tropici CIAT 899	5	5	0	0	0	5	0	0	0
NZ_CP006632.1	1001989	Escherichia coli PCN033	0	0	0	0	0	0	0	0	0
NC_017186.1	713604	Amycolatopsis mediterranei S699	4	3	0	0	0	3	0	0	0
NC_010002.1	398578	Delftia acidovorans SPH-1	7	6	0	0	0	3	0	0	0
NC_007722.1	314225	Erythrobacter litoralis HTCC2594	2	1	0	0	0	1	0	0	0
NC_018622.1	1218356	Chlamydia psittaci WS/RT/E30	2	2	0	0	0	2	0	0	0
NZ_CP009364.1	1454377	Yersinia frederiksenii Y225	4	4	0	0	0	0	0	0	0
NZ_CP011636.1	571	Klebsiella oxytoca	5	4	0	0	0	4	0	0	0
NZ_CP007663.1	235	Brucella abortus	1	1	0	0	0	0	0	0	0
NC_013714.1	401473	Bifidobacterium dentium Bd1	2	2	0	0	0	2	0	0	0
NC_020537.1	1074919	Staphylococcus aureus subsp. aureus ST228	0	0	0	0	0	0	0	0	0
NC_016791.1	755731	Clostridium sp. BNL1100	4	4	0	0	0	4	0	0	0
NC_002952.2	282458	Staphylococcus aureus subsp. aureus MRSA252	4	4	0	0	0	3	0	0	0
NZ_CP004360.1	1296990	Komagataeibacter xylinus E25	3	3	0	0	0	3	0	0	0
NC_007503.1	246194	Carboxydothermus hydrogenoformans Z-2901	3	3	0	0	0	3	0	0	0
NZ_CP006975.1	1434773	Chlamydia muridarum str. Nigg CM972	0	0	0	0	0	0	0	0	0
NC_011035.1	521006	Neisseria gonorrhoeae NCCP11945	0	0	0	0	0	0	0	0	0
NZ_CP012384.1	53345	Enterococcus durans	1	1	0	0	0	1	0	0	0
NC_012791.1	543728	Variovorax paradoxus S110	2	2	0	0	0	2	0	0	0
NZ_LM995447.1	29343	[Clostridium] cellulosi	4	4	0	0	0	4	0	0	0
NZ_CP011854.1	316	Pseudomonas stutzeri	4	3	0	0	0	3	0	0	0
NZ_CP009798.1	339670	Burkholderia ambifaria AMMD	8	6	0	0	0	5	0	0	0
NZ_CP008941.1	91604	Candidatus Paracaedibacter acanthamoebae	3	3	0	0	0	3	0	0	0
NC_020833.1	1249531	Mannheimia haemolytica USDA-ARS-USMARC-183	2	2	0	0	0	2	0	0	0
NZ_CP008801.1	1435461	Escherichia coli KLY	5	0	0	0	0	0	0	0	0
NC_017456.1	1009464	Gardnerella vaginalis HMP9231	0	0	0	0	0	0	0	0	0
NZ_CP007422.1	1412462	Salmonella enterica subsp. enterica serovar Enteritidis str. EC20090531	2	2	0	0	0	2	0	0	0
NZ_CP004379.1	884204	Burkholderia pseudomallei 1026b	4	3	0	0	0	1	0	0	0
NZ_CP011494.1	330734	Marinobacter psychrophilus	3	3	0	0	0	3	0	0	0
NZ_HG738867.1	1403831	Escherichia coli str. K-12 substr. MC4100	3	0	0	0	0	0	0	0	0
NC_017125.1	634455	Acetobacter pasteurianus IFO 3283-22	2	2	0	0	0	2	0	0	0
NC_014414.1	314260	Parvularcula bermudensis HTCC2503	2	2	0	0	0	2	0	0	0
NZ_CP009407.1	1299325	Mycobacterium abscessus subsp. bolletii 103	1	1	0	0	0	1	0	0	0
NZ_CP010848.1	145458	Rathayibacter toxicus	2	2	0	0	0	2	0	0	0
NC_020307.1	1267753	Salmonella enterica subsp. enterica serovar Javiana str. CFSAN001992	4	4	0	0	0	4	0	0	0
NC_016582.1	749414	Streptomyces bingchenggensis BCW-1	8	7	0	0	0	6	0	0	0
NZ_CP011073.1	817	Bacteroides fragilis	2	2	0	0	0	2	0	0	0
NC_022239.1	862971	Streptococcus anginosus C238	3	2	0	0	0	2	0	0	0
NC_011094.1	439843	Salmonella enterica subsp. enterica serovar Schwarzengrund str. CVM19633	2	2	0	0	0	2	0	0	0
NC_017618.1	945704	Streptococcus suis JS14	2	2	0	0	0	2	0	0	0
NC_015711.1	483219	Myxococcus fulvus HW-1	6	6	0	0	0	5	0	1	0
NZ_CP002882.1	1010835	Mycobacterium tuberculosis BT2	2	2	0	0	0	0	0	0	0
NZ_CP005286.1	1223515	Corynebacterium humireducens NBRC 106098 = DSM 45392	1	1	0	0	0	1	0	0	0
NC_014365.1	644282	Desulfarculus baarsii DSM 2075	3	3	0	0	0	3	0	0	0
NZ_CP012037.1	264	Francisella tularensis subsp. novicida	2	2	0	0	0	2	0	0	0
NC_021717.1	1300256	Alteromonas macleodii str. 'Ionian Sea U7'	2	2	0	0	0	2	0	0	0
NZ_AP012273.1	1076588	Thiolapillus brandeum	1	1	0	0	0	1	0	0	0
NZ_CP010867.1	1311	Streptococcus agalactiae	1	1	0	0	0	1	0	0	0
NC_015734.1	979982	Leuconostoc sp. C2	0	0	0	0	0	0	0	0	0
NC_007350.1	342451	Staphylococcus saprophyticus subsp. saprophyticus ATCC 15305	0	0	0	0	0	0	0	0	0
NC_021831.1	754503	Mycoplasma hyopneumoniae 7422	1	1	0	0	0	1	0	0	0
NZ_CP008889.1	1274	Dermacoccus nishinomiyaensis	3	3	0	0	0	3	0	0	0
NZ_CP007593.1	1313	Streptococcus pneumoniae	4	4	0	0	0	2	0	0	0
NC_001263.1	243230	Deinococcus radiodurans R1	2	1	0	0	0	1	0	0	0
NC_021825.1	1639	Listeria monocytogenes	0	0	0	0	0	0	0	0	0
NC_014103.1	592022	Bacillus megaterium DSM 319	4	4	0	0	0	4	0	0	0
NZ_CP007778.1	1453988	Campylobacter lari RM16712	0	0	0	0	0	0	0	0	0
NC_012416.1	66084	Wolbachia sp. wRi	1	1	0	0	0	0	0	0	0
NZ_LK021130.1	55601	Vibrio anguillarum	0	0	0	0	0	0	0	0	0
NZ_CP009281.1	1536770	Paenibacillus sp. FSL R5-0345	7	7	0	0	0	7	0	0	0
NC_014166.1	572480	Arcobacter nitrofigilis DSM 7299	1	1	0	0	0	1	0	0	0
NC_023063.1	1423892	Ehrlichia muris AS145	0	0	0	0	0	0	0	0	0
NZ_CP010050.1	1360	Lactococcus lactis subsp. lactis	2	2	0	0	0	2	0	0	0
NZ_CP009242.1	1639	Listeria monocytogenes	3	3	0	0	0	3	0	0	0
NZ_CP009280.1	1536769	Paenibacillus sp. FSL P4-0081	7	6	0	0	0	6	0	0	0
NC_017568.1	984892	Staphylococcus pseudintermedius ED99	3	3	0	0	0	3	0	0	0
NC_015574.1	868131	Methanobacterium paludis	2	2	0	0	0	2	0	0	0
NZ_CP009610.1	727	Haemophilus influenzae	1	1	0	0	0	1	0	0	0
NZ_CP006851.1	1408176	Campylobacter jejuni subsp. jejuni F38011	0	0	0	0	0	0	0	0	0
NC_018608.1	1229492	Staphylococcus aureus 08BA02176	0	0	0	0	0	0	0	0	0
NZ_CP007446.1	1196094	Snodgrassella alvi wkB2	1	0	0	0	0	0	0	0	0
NZ_CP009838.1	630	Yersinia enterocolitica	5	5	0	0	0	5	0	0	0
NC_006512.1	283942	Idiomarina loihiensis L2TR	3	3	0	0	0	3	0	0	0
NC_002662.1	272623	Lactococcus lactis subsp. lactis Il1403	0	0	0	0	0	0	0	0	0
NC_017068.1	927704	Selenomonas ruminantium subsp. lactilytica TAM6421	3	3	0	0	0	3	0	0	0
NC_017039.1	1080230	Synechocystis sp. PCC 6803 substr. PCC-P	3	3	0	0	0	3	0	0	0
NZ_CP009514.1	1434113	Methanosarcina mazei C16	2	2	0	0	0	2	0	0	0
NZ_LM997412.1	875453	Peptoniphilus sp. 1-1	0	0	0	0	0	0	0	0	0
NZ_CP009436.1	28110	Francisella philomiragia	1	1	0	0	0	1	0	0	0
NC_016023.1	345219	Bacillus coagulans 36D1	2	2	0	0	0	2	0	0	0
NZ_CP008922.1	1719	Corynebacterium pseudotuberculosis	1	1	0	0	0	1	0	0	0
NC_017248.1	1029825	Brucella melitensis NI	0	0	0	0	0	0	0	0	0
NZ_CP010975.1	914150	Kangiella geojedonensis	3	3	0	0	0	3	0	0	0
NC_000913.3	511145	Escherichia coli str. K-12 substr. MG1655	1	0	0	0	0	0	0	0	0
NZ_CP008834.1	28450	Burkholderia pseudomallei	5	5	0	0	0	0	0	0	0
NC_012472.1	572264	Bacillus cereus 03BB102	3	3	0	0	0	0	0	0	0
NC_020419.1	471821	uncultured Termite group 1 bacterium phylotype Rs-D17	0	0	0	0	0	0	0	0	0
NC_017581.1	1051074	Streptococcus thermophilus JIM 8232	0	0	0	0	0	0	0	0	0
NC_015315.1	999630	Thermoproteus uzoniensis 768-20	0	0	0	0	0	0	0	0	0
NC_003912.7	195099	Campylobacter jejuni RM1221	2	2	0	0	0	2	0	0	0
NC_017121.1	634454	Acetobacter pasteurianus IFO 3283-07	0	0	0	0	0	0	0	0	0
NZ_CP012687.1	305	Ralstonia solanacearum	3	3	0	0	0	3	0	0	0
NC_015145.1	930171	Arthrobacter phenanthrenivorans Sphe3	0	0	0	0	0	0	0	0	0
NZ_CP009850.1	550	Enterobacter cloacae	4	4	0	0	0	3	0	0	0
NZ_CP010438.1	83333	Escherichia coli K-12	3	0	0	0	0	0	0	0	0
NC_014804.1	391623	Thermococcus barophilus MP	3	3	0	0	0	3	0	0	0
NZ_CP011447.1	520	Bordetella pertussis	1	1	0	0	0	0	0	0	0
NZ_CP000574.1	427140	Leuconostoc mesenteroides KFRI-MG	3	3	0	0	0	3	0	0	0
NC_021026.1	869306	Streptococcus pneumoniae SPN994038	4	4	0	0	0	1	0	1	0
NC_018623.1	1218357	Chlamydia psittaci M56	0	0	0	0	0	0	0	0	0
NZ_AP012327.1	1150460	Bifidobacterium kashiwanohense JCM 15439 = DSM 21854	3	3	0	0	0	1	0	0	0
NC_016749.1	1116231	Streptococcus macedonicus ACA-DC 198	1	1	0	0	0	1	0	0	0
NC_017366.1	102608	Helicobacter pylori F32	2	2	0	0	0	2	0	0	0
NC_017534.1	909952	Propionibacterium acnes 266	0	0	0	0	0	0	0	0	0
NC_017960.1	333849	Enterococcus faecium DO	1	1	0	0	0	1	0	0	0
NC_013523.1	479434	Sphaerobacter thermophilus DSM 20745	4	4	0	0	0	4	0	0	0
NZ_CP007521.1	2113	Mycoplasma californicum	1	0	0	0	0	0	0	0	0
NC_010321.1	340099	Thermoanaerobacter pseudethanolicus ATCC 33223	1	0	0	0	0	0	0	0	0
NC_007086.1	314565	Xanthomonas campestris pv. campestris str. 8004	2	2	0	0	0	2	0	0	0
NC_010730.1	436114	Sulfurihydrogenibium sp. YO3AOP1	0	0	0	0	0	0	0	0	0
NC_006300.1	221988	Mannheimia succiniciproducens MBEL55E	0	0	0	0	0	0	0	0	0
NZ_CP007501.1	576611	Polynucleobacter necessarius subsp. asymbioticus	0	0	0	0	0	0	0	0	0
NC_015875.1	1054460	Streptococcus pseudopneumoniae IS7493	1	1	0	0	0	0	0	0	0
NC_014323.1	757424	Herbaspirillum seropedicae SmR1	3	3	0	0	0	3	0	0	0
NC_017274.1	555311	Sulfolobus solfataricus 98/2	4	4	0	0	0	4	0	0	0
NZ_CP007026.1	1410606	Candidatus Nitrosopelagicus brevis	0	0	0	0	0	0	0	0	0
NZ_CP009165.1	1439855	Burkholderia pseudomallei A79A	4	3	0	0	0	1	0	0	0
NC_022443.1	1194085	Staphylococcus aureus subsp. aureus SA40	0	0	0	0	0	0	0	0	0
NC_015318.1	760142	Hippea maritima DSM 10411	1	1	0	0	0	1	0	0	0
NC_021670.1	1321369	Staphylococcus aureus Bmb9393	5	5	0	0	0	5	0	0	0
NC_013530.1	446471	Xylanimonas cellulosilytica DSM 15894	5	4	0	0	0	4	0	0	0
NC_013132.1	485918	Chitinophaga pinensis DSM 2588	6	6	0	0	0	6	0	0	0
NZ_CP009361.1	46170	Staphylococcus aureus subsp. aureus	0	0	0	0	0	0	0	0	0
NZ_CP008706.1	470	Acinetobacter baumannii	4	4	0	0	0	4	0	0	0
NZ_CP007215.1	1235834	Kosakonia sacchari SP1	4	2	0	0	0	2	0	0	0
NC_007517.1	269799	Geobacter metallireducens GS-15	1	1	0	0	0	1	0	0	0
NZ_CP012120.1	46170	Staphylococcus aureus subsp. aureus	1	1	0	0	0	1	0	0	0
NZ_CP009762.1	1295	Staphylococcus schleiferi	2	2	0	0	0	2	0	0	0
NZ_CP007060.1	751944	Halobacterium sp. DL1	4	3	0	0	0	3	0	0	0
NC_010473.1	316385	Escherichia coli str. K-12 substr. DH10B	2	0	0	0	0	0	0	0	0
NC_017546.1	393126	Listeria monocytogenes FSL R2-561	2	2	0	0	0	2	0	0	0
NC_008554.1	335543	Syntrophobacter fumaroxidans MPOB	3	3	0	0	0	3	0	0	0
NC_012997.1	377629	Teredinibacter turnerae T7901	3	3	0	0	0	3	0	0	0
NC_008526.1	321967	Lactobacillus casei ATCC 334	3	3	0	0	0	0	0	0	0
NC_018747.1	1234596	Borrelia garinii NMJW1	1	1	0	0	0	0	0	0	0
NC_011274.1	550538	Salmonella enterica subsp. enterica serovar Gallinarum str. 287/91	3	3	0	0	0	3	0	0	0
NZ_CP007161.1	403957	Virgibacillus sp. SK37	3	3	0	0	0	3	0	0	0
NZ_CP011301.1	292	Burkholderia cepacia	5	4	0	0	0	0	0	0	0
NC_014011.1	572547	Aminobacterium colombiense DSM 12261	0	0	0	0	0	0	0	0	0
NC_015567.1	768492	Serratia plymuthica AS9	6	6	0	0	0	0	0	0	0
NC_006814.3	272621	Lactobacillus acidophilus NCFM	0	0	0	0	0	0	0	0	0
NC_022130.1	1352356	Helicobacter pylori SouthAfrica20	4	4	0	0	0	4	0	0	0
NC_013522.1	525903	Thermanaerovibrio acidaminovorans DSM 6589	3	3	0	0	0	3	0	0	0
NC_015725.1	956483	Mycoplasma bovis Hubei-1	0	0	0	0	0	0	0	0	0
NZ_HG938370.1	1055524	Burkholderia cenocepacia H111	7	7	0	0	0	2	0	0	0
NC_020829.1	1294143	Pseudomonas denitrificans ATCC 13867	4	4	0	0	0	3	0	0	0
NZ_CP011096.1	1267001	Mycoplasma synoviae ATCC 25204	1	1	0	0	0	1	0	0	0
NC_019960.1	908937	Prevotella dentalis DSM 3688	1	1	0	0	0	1	0	0	0
NC_017538.1	1031710	Oligotropha carboxidovorans OM4	1	1	0	0	0	1	0	0	0
NC_018518.1	568706	Bordetella pertussis 18323	3	3	0	0	0	0	0	0	0
NC_009445.1	114615	Bradyrhizobium sp. ORS 278	4	4	0	0	0	4	0	0	0
NC_021177.1	1303692	Streptomyces fulvissimus DSM 40593	5	5	0	0	0	5	0	0	0
NZ_CP009455.1	157783	Pseudomonas cremoricolorata	4	3	0	0	0	3	0	0	0
NZ_HG322950.1	1301098	Pseudomonas knackmussii B13	0	0	0	0	0	0	0	0	0
NC_008532.1	322159	Streptococcus thermophilus LMD-9	2	2	0	0	0	2	0	0	0
NC_014761.1	670487	Oceanithermus profundus DSM 14977	2	2	0	0	0	2	0	0	0
NC_016621.1	1075399	Blattabacterium sp. (Cryptocercus punctulatus) str. Cpu	0	0	0	0	0	0	0	0	0
NZ_CP010852.1	1392	Bacillus anthracis	3	3	0	0	0	1	0	0	0
NZ_CP009086.1	149539	Salmonella enterica subsp. enterica serovar Enteritidis	2	1	0	0	0	1	0	0	0
NC_017473.1	999378	Lactobacillus casei LC2W	2	2	0	0	0	0	0	0	0
NC_009831.1	425104	Shewanella sediminis HAW-EB3	3	3	0	0	0	3	0	0	0
NZ_CP010820.1	28031	Lysinibacillus fusiformis	1	1	0	0	0	1	0	0	0
NZ_CP010434.1	96241	Bacillus subtilis subsp. spizizenii	3	2	0	0	0	1	0	0	0
NZ_HG813249.1	1288295	Listeria monocytogenes 6179	1	1	0	0	0	1	0	0	0
NZ_CP011346.1	492670	Bacillus methylotrophicus	5	5	0	0	0	0	0	0	0
NC_010163.1	441768	Acholeplasma laidlawii PG-8A	0	0	0	0	0	0	0	0	0
NC_018586.1	879089	Listeria monocytogenes SLCC2540	2	2	0	0	0	2	0	0	0
NC_015953.1	862751	Streptomyces sp. SirexAA-E	8	8	0	0	0	8	0	0	0
NZ_CP006953.1	1434215	Mannheimia varigena USDA-ARS-USMARC-1388	4	3	0	0	0	3	0	0	0
NC_021739.1	1311760	Mannheimia haemolytica D174	2	2	0	0	0	2	0	0	0
NZ_ABYF01000001.1	564418	Chlamydia trachomatis 70	0	0	0	0	0	0	0	0	0
NC_020546.1	1254439	Bifidobacterium thermophilum RBL67	1	1	0	0	0	1	0	0	0
NC_008149.1	377628	Yersinia pestis Nepal516	6	5	0	0	0	1	0	1	0
NC_014727.1	767455	Lactobacillus delbrueckii subsp. bulgaricus ND02	3	2	0	0	0	2	0	0	0
NC_017517.1	935588	Neisseria meningitidis M01-240355	0	0	0	0	0	0	0	0	0
NC_009785.1	467705	Streptococcus gordonii str. Challis substr. CH1	1	1	0	0	0	1	0	0	0
NC_010084.1	395019	Burkholderia multivorans ATCC 17616	3	2	0	0	0	2	0	0	0
NC_021283.1	1116211	Mycoplasma hyopneumoniae 168-L	2	1	0	0	0	1	0	0	0
NC_019905.1	1215088	Pseudomonas putida HB3267	3	3	0	0	0	2	0	0	0
NC_006156.1	290434	Borrelia bavariensis PBi	1	1	0	0	0	0	0	0	0
NC_020519.1	1204414	Corynebacterium glutamicum K051	3	3	0	0	0	1	0	0	0
NC_007644.1	264732	Moorella thermoacetica ATCC 39073	2	2	0	0	0	2	0	0	0
NC_010465.1	502800	Yersinia pseudotuberculosis YPIII	3	3	0	0	0	0	0	0	0
NZ_CP009494.1	246196	Mycobacterium smegmatis str. MC2 155	7	7	0	0	0	6	0	0	0
NZ_CP012868.1	511145	Escherichia coli str. K-12 substr. MG1655	1	0	0	0	0	0	0	0	0
NZ_CP011386.1	1587	Lactobacillus helveticus	0	0	0	0	0	0	0	0	0
NZ_CP011401.1	520	Bordetella pertussis	2	2	0	0	0	0	0	0	0
NZ_CP007221.1	129394	Xanthomonas oryzae pv. oryzicola	3	3	0	0	0	3	0	0	0
NC_010125.1	272568	Gluconacetobacter diazotrophicus PA1 5	3	3	0	0	0	3	0	0	0
NZ_CP012837.1	1719	Corynebacterium pseudotuberculosis	2	2	0	0	0	2	0	0	0
NC_021194.1	1310115	Mycobacterium tuberculosis EAI5/NITR206	3	2	0	0	0	0	0	0	0
NZ_AP013354.1	1391726	Helicobacter pylori 26695-1	0	0	0	0	0	0	0	0	0
NC_007984.1	374463	Baumannia cicadellinicola str. Hc (Homalodisca coagulata)	0	0	0	0	0	0	0	0	0
NC_017367.1	866346	Helicobacter pylori F57	1	1	0	0	0	1	0	0	0
NC_014960.1	926569	Anaerolinea thermophila UNI-1	2	2	0	0	0	2	0	0	0
NC_021890.1	907269	Chlamydia trachomatis RC-F(s)/342	0	0	0	0	0	0	0	0	0
NC_017322.1	698936	Sinorhizobium meliloti BL225C	3	2	0	0	0	2	0	0	0
NZ_CP007473.1	1249651	Ehrlichia chaffeensis str. Heartland	1	1	0	0	0	1	0	0	0
NC_010364.1	478009	Halobacterium salinarum R1	1	1	0	0	0	1	0	0	0
NZ_CP011339.1	1638788	Microcystis panniformis FACHB-1757	2	2	0	0	0	0	0	0	0
NC_017384.1	759362	Ketogulonicigenium vulgare WSH-001	2	2	0	0	0	2	0	0	0
NC_017044.1	1105108	Rickettsia parkeri str. Portsmouth	3	2	0	0	0	0	0	1	0
NC_003911.12	246200	Ruegeria pomeroyi DSS-3	4	3	0	0	0	3	0	0	0
NZ_CP007719.1	520487	Brucella suis bv. 3 str. 686	3	2	0	0	0	0	0	0	0
NZ_CP011966.1	1428454	Clostridium pasteurianum NRRL B-598	3	2	0	0	0	2	0	0	0
NC_016941.1	985002	Staphylococcus argenteus	0	0	0	0	0	0	0	0	0
NZ_CP007523.1	1454642	Salmonella enterica subsp. enterica serovar Typhimurium str. CDC 2011K-0870	2	1	0	0	0	1	0	0	0
NZ_CP011444.1	520	Bordetella pertussis	2	2	0	0	0	1	0	0	0
NZ_LK936442.1	28450	Burkholderia pseudomallei	2	0	0	0	0	0	0	0	0
NZ_CP006829.1	1208320	Thalassolituus oleivorans R6-15	1	1	0	0	0	1	0	0	0
NZ_CP007670.1	1280	Staphylococcus aureus	1	1	0	0	0	1	0	0	0
NC_013198.1	568703	Lactobacillus rhamnosus GG	3	3	0	0	0	3	0	0	0
NC_021235.1	767453	Lactobacillus fermentum F-6	0	0	0	0	0	0	0	0	0
NC_021352.1	1232383	Corynebacterium glutamicum SCgG2	2	2	0	0	0	2	0	0	0
NC_021172.1	670307	Hyphomicrobium denitrificans 1NES1	2	2	0	0	0	2	0	0	0
NZ_CP009470.1	1295	Staphylococcus schleiferi	3	3	0	0	0	3	0	0	0
NZ_CP006762.1	1345704	Yersinia pestis 1413	2	2	0	0	0	0	0	0	0
NC_017440.1	707187	Chlamydia trachomatis G/11074	0	0	0	0	0	0	0	0	0
NZ_CP009422.1	487	Neisseria meningitidis	0	0	0	0	0	0	0	0	0
NC_003197.1	99287	Salmonella enterica subsp. enterica serovar Typhimurium str. LT2	3	2	0	0	0	2	0	0	0
NC_017161.1	608538	Hydrogenobacter thermophilus TK-6	1	0	0	0	0	0	0	0	0
NC_011766.1	490899	Desulfurococcus kamchatkensis 1221n	0	0	0	0	0	0	0	0	0
NC_014147.1	1236608	Moraxella catarrhalis BBH18	1	1	0	0	0	1	0	0	0
NC_014448.1	872331	Mycoplasma hyorhinis HUB-1	0	0	0	0	0	0	0	0	0
NC_012029.1	416348	Halorubrum lacusprofundi ATCC 49239	2	1	0	0	0	1	0	0	0
NC_014100.1	509190	Caulobacter segnis ATCC 21756	1	1	0	0	0	1	0	0	0
NC_021741.1	1346614	Serratia liquefaciens ATCC 27592	3	3	0	0	0	3	0	0	0
NC_023013.1	1417673	Haloarcula hispanica N601	1	1	0	0	0	0	0	0	0
NZ_CP009863.1	72407	Klebsiella pneumoniae subsp. pneumoniae	5	5	0	0	0	4	0	0	0
NZ_CP009679.1	492670	Bacillus methylotrophicus	4	4	0	0	0	1	0	0	0
NZ_CP007274.1	1412475	Salmonella enterica subsp. enterica serovar Enteritidis str. SA20093266	2	2	0	0	0	2	0	0	0
NC_017644.1	1033813	Escherichia coli NA114	4	2	0	0	0	2	0	0	0
NC_010524.1	395495	Leptothrix cholodnii SP-6	4	4	0	0	0	4	0	0	0
NZ_HG941718.1	1359206	Escherichia coli ST131	3	2	0	0	0	2	0	0	0
NC_018073.1	591365	Streptococcus intermedius JTH08	1	1	0	0	0	1	0	0	0
NZ_CP009928.1	1324352	Chryseobacterium gallinarum	3	3	0	0	0	3	0	0	0
NC_016610.1	203275	Tannerella forsythia 92A2	1	1	0	0	0	1	0	0	0
NC_019974.1	694430	Natronococcus occultus SP4	4	3	0	0	0	3	0	0	0
NC_015744.1	887712	Chlamydia trachomatis L2c	1	1	0	0	0	1	0	0	0
NC_015185.1	868864	Desulfurobacterium thermolithotrophum DSM 11699	2	1	0	0	0	1	0	0	0
NC_021893.1	1007870	Chlamydia trachomatis RC-L2/55	1	1	0	0	0	1	0	0	0
NZ_AP012334.1	1150468	Scardovia inopinata JCM 12537	2	2	0	0	0	2	0	0	0
NC_019396.1	1224746	Gluconobacter oxydans H24	5	4	0	0	0	4	0	0	0
NZ_CP009125.1	29471	Pectobacterium atrosepticum	2	2	0	0	0	2	0	0	0
NZ_LK028559.1	35623	Acholeplasma oculi	0	0	0	0	0	0	0	0	0
NZ_CP007738.1	235	Brucella abortus	1	1	0	0	0	0	0	0	0
NZ_CP011256.1	339	Xanthomonas campestris	1	1	0	0	0	1	0	0	0
NZ_CM001467.1	1144888	Rickettsia helvetica C9P9	1	1	0	0	0	1	0	0	0
NZ_CP007441.1	316	Pseudomonas stutzeri	5	5	0	0	0	4	0	0	0
NC_017593.1	869216	Streptococcus pneumoniae INV200	1	1	0	0	0	1	0	0	0
NC_017769.2	1130804	Streptococcus pneumoniae ST556	1	0	0	0	0	0	0	0	0
NC_020518.1	1110693	Escherichia coli str. K-12 substr. MDS42	2	0	0	0	0	0	0	0	0
NC_015696.1	573569	Francisella sp. TX077308	1	1	0	0	0	1	0	0	0
NZ_AP012555.1	1229671	Mycobacterium avium subsp. hominissuis TH135	0	0	0	0	0	0	0	0	0
NC_014171.1	714359	Bacillus thuringiensis BMB171	4	4	0	0	0	1	0	0	0
NC_021057.1	1234603	Candidatus Moranella endobia PCVAL	0	0	0	0	0	0	0	0	0
NZ_CP009447.1	319705	Mycobacterium abscessus subsp. bolletii	1	1	0	0	0	1	0	0	0
NC_018939.1	85962	Helicobacter pylori 26695	2	2	0	0	0	2	0	0	0
NC_004369.1	196164	Corynebacterium efficiens YS-314	1	0	0	1	0	0	0	1	0
NC_016779.1	347495	Bacillus cereus F837/76	2	1	0	0	0	0	0	0	0
NZ_CP010289.1	119857	Francisella tularensis subsp. holarctica	0	0	0	0	0	0	0	0	0
NC_013411.1	544556	Geobacillus sp. Y412MC61	2	2	0	0	0	0	0	0	0
NZ_CP010284.1	858307	Salmonella enterica subsp. enterica serovar Newport str. CVM N1543	3	3	0	0	0	3	0	0	0
NZ_AHJO01000001.1	1132501	Sulfolobus islandicus M.16.23	0	0	0	0	0	0	0	0	0
NC_017941.2	523841	Haloferax mediterranei ATCC 33500	1	1	0	0	0	1	0	0	0
NC_022659.1	1241583	Burkholderia pseudomallei NCTC 13179	7	5	0	0	0	1	0	0	0
NC_004088.1	187410	Yersinia pestis KIM10+	2	2	0	0	0	0	0	0	0
NC_015589.1	696281	Desulfotomaculum ruminis DSM 2154	4	4	0	0	0	4	0	0	0
NC_015435.1	1006006	Metallosphaera cuprina Ar-4	0	0	0	0	0	0	0	0	0
NC_015214.1	891391	Lactobacillus acidophilus 30SC	0	0	0	0	0	0	0	0	0
NZ_CP012590.1	712122	Actinomyces sp. oral taxon 414	2	2	0	0	0	2	0	0	0
NZ_CP011564.1	1604004	Halanaeroarchaeum sulfurireducens	2	2	0	0	0	2	0	0	0
NZ_CP011279.1	93218	Pandoraea apista	3	3	0	0	0	3	0	0	0
NZ_CP011922.1	1449091	Francisella noatunensis subsp. orientalis FNO24	1	1	0	0	0	1	0	0	0
NZ_CP004377.1	1249477	Burkholderia pseudomallei NAU35A-3	9	9	0	0	0	2	0	0	0
NZ_CP003328.1	1147130	Pasteurella multocida subsp. multocida str. HB03	0	0	0	0	0	0	0	0	0
NC_008786.1	391735	Verminephrobacter eiseniae EF01-2	3	3	0	0	0	3	0	0	0
NC_004307.2	206672	Bifidobacterium longum NCC2705	3	2	0	0	0	2	0	0	0
NC_021738.1	1311759	Mannheimia haemolytica D171	2	2	0	0	0	2	0	0	0
NZ_CP011538.1	2098	Mycoplasma hominis	0	0	0	0	0	0	0	0	0
NZ_AEUT02000001.1	873447	Streptococcus parauberis NCFD 2020	2	2	0	0	0	2	0	0	0
NC_009511.1	392499	Sphingomonas wittichii RW1	4	4	0	0	0	4	0	0	0
NC_009776.1	453591	Ignicoccus hospitalis KIN4/I	1	1	0	0	0	1	0	0	0
NZ_CP012349.1	938141	Salmonella enterica subsp. enterica serovar Sloterdijk str. ATCC 15791	2	2	0	0	0	2	0	0	0
NZ_CP009499.1	1299331	Mycobacterium intracellulare 1956	5	5	0	0	0	2	0	0	0
NC_019751.1	1170562	Calothrix sp. PCC 6303	4	3	0	0	0	3	0	0	0
NC_018417.1	1202539	Candidatus Carsonella ruddii HT isolate Thao2000	0	0	0	0	0	0	0	0	0
NC_021593.1	1281781	Bifidobacterium animalis subsp. lactis Bl12	1	1	0	0	0	1	0	0	0
NZ_CP006819.1	1408178	Streptococcus thermophilus ASCC 1275	1	1	0	0	0	1	0	0	0
NZ_CP009016.1	611301	Xanthomonas citri subsp. citri	1	1	0	0	0	0	0	0	0
NZ_CP010441.1	83333	Escherichia coli K-12	5	3	0	0	0	3	0	0	0
NC_017505.1	630588	Neisseria meningitidis alpha710	0	0	0	0	0	0	0	0	0
NZ_HG965802.1	38323	Bartonella henselae	4	4	0	0	0	4	0	0	0
NC_016909.1	1105105	Rickettsia rickettsii str. Arizona	0	0	0	0	0	0	0	0	0
NC_018412.1	1159203	Mycoplasma gallisepticum CA06_2006.052-5-2P	0	0	0	0	0	0	0	0	0
NZ_CP002871.1	1010834	Mycobacterium tuberculosis HKBS1	3	3	0	0	0	0	0	0	0
NC_008595.1	243243	Mycobacterium avium 104	2	2	0	0	0	2	0	0	0
NZ_CP010442.1	83333	Escherichia coli K-12	2	1	0	0	0	1	0	0	0
NZ_CP008953.1	208439	Amycolatopsis japonica	7	7	0	0	0	7	0	0	0
NZ_CP010818.1	65058	Corynebacterium ulcerans	2	2	0	0	0	2	0	0	0
NC_014298.1	795797	Halalkalicoccus jeotgali B3	4	4	0	0	0	4	0	0	0
NC_021889.1	907267	Chlamydia trachomatis RC-J/953	1	1	0	0	0	1	0	0	0
NC_018866.1	1147129	Dehalobacter sp. DCA	1	1	0	0	0	0	0	0	0
NC_017111.1	634457	Acetobacter pasteurianus IFO 3283-32	1	1	0	0	0	1	0	0	0
NZ_CP009429.1	33050	Sphingopyxis macrogoltabida	5	5	0	0	0	5	0	0	0
NC_020064.1	1249634	Serratia marcescens FGI94	4	4	0	0	0	4	0	0	0
NC_017281.1	718271	Campylobacter jejuni subsp. jejuni S3	4	4	0	0	0	4	0	0	0
NC_010278.1	434271	Actinobacillus pleuropneumoniae serovar 3 str. JL03	2	2	0	0	0	1	0	0	0
NC_011992.1	535289	Acidovorax ebreus TPSY	2	2	0	0	0	2	0	0	0
NC_017063.1	1055527	Helicobacter pylori ELS37	3	3	0	0	0	3	0	0	0
NZ_CP011522.1	1649184	Streptomyces sp. CFMR 7	11	11	0	0	0	10	0	0	0
NZ_CP010519.1	1888	Streptomyces albus	8	8	0	0	0	8	0	0	0
NZ_CP012482.1	1408	Bacillus pumilus	5	3	0	0	0	3	0	0	0
NC_009656.1	381754	Pseudomonas aeruginosa PA7	3	3	0	0	0	3	0	0	0
NZ_CP009117.1	1398491	Borrelia valaisiana Tom4006	0	0	0	0	0	0	0	0	0
NZ_CP007520.1	743967	Mycoplasma yeatsii GM274B	0	0	0	0	0	0	0	0	0
NC_020210.1	1233873	Geobacillus sp. GHH01	0	0	0	0	0	0	0	0	0
NC_012925.1	218494	Streptococcus suis P1/7	2	2	0	0	0	2	0	0	0
NZ_CP011018.1	562	Escherichia coli	3	1	0	0	0	1	0	0	0
NC_016809.1	862964	Haemophilus influenzae 10810	0	0	0	0	0	0	0	0	0
NZ_CP009759.1	633	Yersinia pseudotuberculosis	6	6	0	0	0	1	0	0	0
NZ_CP009426.1	1773	Mycobacterium tuberculosis	3	3	0	0	0	0	0	0	0
NZ_CP012090.1	659019	Mycobacterium tuberculosis W-148	4	4	0	0	0	0	0	0	0
NC_015573.1	760568	Desulfotomaculum kuznetsovii DSM 6115	2	2	0	0	0	2	0	0	0
NC_015726.1	1042878	Cupriavidus necator N-1	7	4	0	0	0	4	0	0	0
NZ_CP007147.1	1448140	Pseudomonas aeruginosa YL84	2	2	0	0	0	2	0	0	0
NZ_CP008714.1	487909	Xanthomonas translucens pv. undulosa	2	2	0	0	0	2	0	0	0
NC_015931.1	694429	Pyrolobus fumarii 1A	0	0	0	0	0	0	0	0	0
NC_003997.3	198094	Bacillus anthracis str. Ames	4	4	0	0	0	2	0	0	0
NZ_CP007522.1	1316911	Bifidobacterium animalis subsp. lactis KLDS2.0603	2	2	0	0	0	2	0	0	0
NC_014961.1	765177	Desulfurococcus mucosus DSM 2162	2	1	0	0	0	1	0	0	0
NZ_CP011389.1	1309411	'Deinococcus soli' Cha et al. 2014	0	0	0	0	0	0	0	0	0
NC_017307.1	935697	Corynebacterium pseudotuberculosis CIP 52.97	1	1	0	0	0	1	0	0	0
NC_008610.1	413404	Candidatus Ruthia magnifica str. Cm (Calyptogena magnifica)	0	0	0	0	0	0	0	0	0
NC_015946.1	743965	Mycoplasma putrefaciens KS1	3	2	0	0	0	2	0	0	0
NZ_HG917972.2	1131442	Mycobacterium marinum E11	7	7	0	0	0	5	0	0	0
NC_017503.1	708616	Mycoplasma gallisepticum str. F	2	1	0	0	0	1	0	0	0
NC_013512.1	525898	Sulfurospirillum deleyianum DSM 6946	2	2	0	0	0	2	0	0	0
NC_013959.1	580332	Sideroxydans lithotrophicus ES-1	3	3	0	0	0	3	0	0	0
NZ_CP011647.1	573	Klebsiella pneumoniae	2	2	0	0	0	2	0	0	0
NZ_AP014522.1	1420599	Pseudomonas protegens Cab57	2	2	0	0	0	2	0	0	0
NZ_LN847257.1	83558	Chlamydia pneumoniae	2	1	0	0	0	1	0	0	0
NC_020209.1	1282356	Pseudomonas poae RE*1-1-14	3	3	0	0	0	3	0	0	0
NC_012207.1	561275	Mycobacterium bovis BCG str. Tokyo 172	2	2	0	0	0	0	0	0	0
NC_015677.1	365046	Ramlibacter tataouinensis TTB310	5	5	0	0	0	5	0	0	0
NC_014472.1	313603	Maribacter sp. HTCC2170	1	1	0	0	0	1	0	0	0
NZ_CP004858.1	570416	Bacillus thuringiensis serovar kurstaki str. YBT-1520	3	3	0	0	0	0	0	0	0
NZ_CP009509.1	1434117	Methanosarcina mazei WWM610	1	1	0	0	0	1	0	0	0
NC_019776.1	755178	Cyanobacterium aponinum PCC 10605	2	0	0	0	0	0	0	0	0
NZ_CP007176.1	1458279	Staphylococcus aureus USA300-ISMMS1	1	1	0	0	0	1	0	0	0
NZ_CP004393.1	1208324	Celeribacter indicus	3	3	0	0	0	3	0	0	0
NZ_CP010299.1	1280	Staphylococcus aureus	2	2	0	0	0	2	0	0	0
NC_015391.1	208596	Carnobacterium sp. 17-4	1	1	0	0	0	1	0	0	0
NC_011769.1	883	Desulfovibrio vulgaris str. 'Miyazaki F'	1	1	0	0	0	1	0	0	0
NZ_CP007727.1	1094170	Klebsiella pneumoniae subsp. pneumoniae KPNIH10	7	6	0	0	0	5	0	0	0
NC_020299.1	1208920	Candidatus Kinetoplastibacterium oncopeltii TCC290E	0	0	0	0	0	0	0	0	0
NC_012778.1	515620	[Eubacterium] eligens ATCC 27750	2	1	0	0	0	1	0	0	0
NC_022582.1	1156433	Streptococcus sp. I-P16	0	0	0	0	0	0	0	0	0
NC_006513.1	76114	Aromatoleum aromaticum EbN1	5	5	0	0	0	5	0	0	0
NC_018178.1	1191523	Melioribacter roseus P3M-2	2	1	0	0	0	1	0	0	0
NZ_CP007744.1	29471	Pectobacterium atrosepticum	1	1	0	0	0	1	0	0	0
NC_022107.1	1340853	Chlamydia trachomatis F/11-96	0	0	0	0	0	0	0	0	0
NC_021807.1	1336746	Streptococcus pyogenes HSC5	1	1	0	0	0	1	0	0	0
NZ_CP011280.1	187101	Sneathia amnii	0	0	0	0	0	0	0	0	0
NC_010546.1	43989	Cyanothece sp. ATCC 51142	2	2	0	0	0	2	0	0	0
NZ_CP011060.1	1329908	Borrelia hermsii CC1	0	0	0	0	0	0	0	0	0
NC_002689.2	273116	Thermoplasma volcanium GSS1	1	1	0	0	0	1	0	0	0
NC_007481.1	326442	Pseudoalteromonas haloplanktis TAC125	4	4	0	0	0	4	0	0	0
NZ_CP009341.1	1392	Bacillus anthracis	6	6	0	0	0	0	0	1	0
NC_013199.1	568704	Lactobacillus rhamnosus Lc 705	3	3	0	0	0	3	0	0	0
NC_009783.1	338187	Vibrio campbellii ATCC BAA-1116	3	3	0	0	0	2	0	0	0
NC_008260.1	393595	Alcanivorax borkumensis SK2	0	0	0	0	0	0	0	0	0
NZ_CP010436.1	210	Helicobacter pylori	1	1	0	0	0	1	0	0	0
NC_017502.1	710128	Mycoplasma gallisepticum str. R(high)	1	0	0	0	0	0	0	0	0
NZ_CP010586.1	1452722	Bacillus megaterium Q3	5	5	0	0	0	5	0	0	0
NC_011989.1	311402	Agrobacterium vitis S4	6	6	0	0	0	6	0	0	0
NC_014638.1	702459	Bifidobacterium bifidum PRL2010	3	3	0	0	0	3	0	0	0
NZ_CP009601.1	1249660	Burkholderia thailandensis 2002721643	2	1	0	0	0	1	0	0	0
NC_013192.1	523794	Leptotrichia buccalis C-1013-b	0	0	0	0	0	0	0	0	0
NC_014924.1	743721	Pseudoxanthomonas suwonensis 11-1	3	3	0	0	0	3	0	0	0
NC_015633.1	882102	Vibrio anguillarum 775	3	3	0	0	0	3	0	0	0
NZ_CP010089.1	29338	Bacillus thuringiensis serovar galleriae	6	5	0	0	0	1	0	1	0
NZ_CP010912.1	589873	Alteromonas australica	5	5	0	0	0	5	0	0	0
NZ_CP011535.1	1314	Streptococcus pyogenes	0	0	0	0	0	0	0	0	0
NC_009009.1	388919	Streptococcus sanguinis SK36	2	2	0	0	0	2	0	0	0
NZ_CP011259.1	1124917	Salmonella enterica subsp. enterica serovar Agona str. 460004 2-1	2	2	0	0	0	2	0	0	0
NZ_CP009692.1	1405	Bacillus mycoides	7	7	0	0	0	2	0	0	0
NZ_CP009273.1	679895	Escherichia coli BW25113	6	2	0	0	0	2	0	0	0
NC_022081.1	1150476	Bacillus methylotrophicus UCMB5113	1	1	0	0	0	0	0	0	0
NC_006677.1	290633	Gluconobacter oxydans 621H	2	2	0	0	0	2	0	0	0
NC_016616.1	640081	Dechlorosoma suillum PS	2	2	0	0	0	2	0	0	0
NC_014328.1	748727	Clostridium ljungdahlii DSM 13528	5	4	0	0	0	2	0	0	0
NC_022898.1	1415167	Bacillus subtilis PY79	3	2	0	0	0	0	0	0	0
NC_010513.1	405440	Xylella fastidiosa M12	4	4	0	0	0	4	0	0	0
NZ_CP006772.1	1400053	Bacteroidales bacterium CF	0	0	0	0	0	0	0	0	0
NC_016802.1	698968	Corynebacterium diphtheriae HC02	1	1	0	0	0	1	0	0	0
NZ_CP011129.1	84531	Lysobacter antibioticus	5	5	0	0	0	5	0	0	0
NC_016787.1	698969	Corynebacterium diphtheriae HC03	3	3	0	0	0	3	0	0	0
NZ_CP007183.1	1183378	Campylobacter coli RM1875	2	2	0	0	0	2	0	0	0
NC_004552.2	218497	Chlamydophila abortus S26/3	0	0	0	0	0	0	0	0	0
NZ_CP007541.1	325775	Coxiella endosymbiont of Amblyomma americanum	1	1	0	0	0	1	0	0	0
NC_016111.1	1003195	Streptomyces cattleya NRRL 8057 = DSM 46488	3	2	0	0	0	2	0	0	0
NC_021872.1	1358027	Lactobacillus reuteri TD1	2	2	0	0	0	2	0	0	0
NZ_CP009290.1	86192	Pseudomonas chlororaphis subsp. aurantiaca	6	5	0	0	0	5	0	0	0
NC_017192.1	944547	Arcobacter sp. L	3	3	0	0	0	3	0	0	0
NC_022583.1	1406864	Mesoplasma florum W37	1	1	0	0	0	1	0	0	0
NZ_CP007760.1	520466	Brucella melitensis bv. 3 str. Ether	0	0	0	0	0	0	0	0	0
NC_010161.1	382640	Bartonella tribocorum CIP 105476	1	0	0	0	0	0	0	0	0
NC_010336.1	484022	Francisella philomiragia subsp. philomiragia ATCC 25017	1	1	0	0	0	1	0	0	0
NC_020164.1	1194526	Staphylococcus warneri SG1	2	2	0	0	0	2	0	0	0
NZ_CP012381.1	1587	Lactobacillus helveticus	2	2	0	0	0	2	0	0	0
NC_002745.2	158879	Staphylococcus aureus subsp. aureus N315	1	1	0	0	0	1	0	0	0
NC_023066.1	1408272	Pseudomonas aeruginosa LES431	3	3	0	0	0	3	0	0	0
NZ_CP012358.1	1697053	Pseudomonadaceae bacterium B4199	0	0	0	0	0	0	0	0	0
NZ_CP007393.1	562	Escherichia coli	5	4	0	0	0	3	0	0	0
NC_014831.1	644966	Thermaerobacter marianensis DSM 12885	2	1	0	0	0	1	0	0	0
NC_017790.1	745776	Deinococcus gobiensis I-0	2	2	0	0	0	2	0	0	0
NC_012891.1	486410	Streptococcus dysgalactiae subsp. equisimilis GGS_124	0	0	0	0	0	0	0	0	0
NC_015709.1	579138	Zymomonas mobilis subsp. pomaceae ATCC 29192	0	0	0	0	0	0	0	0	0
NZ_CP008881.1	96345	Flavobacterium psychrophilum	1	1	0	0	0	1	0	0	0
NZ_CP009511.1	1434115	Methanosarcina mazei SarPi	2	2	0	0	0	2	0	0	0
NC_015590.1	693982	Sinorhizobium meliloti AK83	5	3	0	0	0	3	0	0	0
NZ_CP006027.1	1248902	Escherichia coli O145:H28 str. RM13514	7	2	0	0	0	2	0	0	0
NC_016048.1	693746	Oscillibacter valericigenes Sjm18-20	4	4	0	0	0	4	0	0	0
NZ_CP006271.1	585425	Synechococcus sp. KORDI-52	0	0	0	0	0	0	0	0	0
NZ_CP004383.1	1249667	Burkholderia thailandensis USAMRU Malaysia #20	5	3	0	0	0	1	0	0	0
NC_022126.1	585143	Staphylococcus aureus subsp. aureus 55/2053	0	0	0	0	0	0	0	0	0
NC_013654.1	431946	Escherichia coli SE15	6	5	0	0	0	5	0	0	0
NZ_CP013050.1	55802	Thermococcus barophilus	1	1	0	0	0	1	0	0	0
NC_019753.1	1173022	Crinalium epipsammum PCC 9333	6	5	0	0	0	5	0	0	0
NZ_CP012024.1	1479	Bacillus smithii	2	1	0	0	0	1	0	0	0
NC_006155.1	273123	Yersinia pseudotuberculosis IP 32953	2	2	0	0	0	0	0	0	0
NZ_CP011528.1	1280	Staphylococcus aureus	1	0	0	0	0	0	0	0	0
NZ_CP009641.1	451709	Bacillus cereus 03BB108	2	2	0	0	0	0	0	0	0
NC_013921.1	580331	Thermoanaerobacter italicus Ab9	1	1	0	0	0	1	0	0	0
NC_013124.1	525909	Acidimicrobium ferrooxidans DSM 10331	0	0	0	0	0	0	0	0	0
NZ_CP009709.1	1121088	Bacillus coagulans DSM 1 = ATCC 7050	3	3	0	0	0	3	0	0	0
NC_018692.1	1004785	Alteromonas macleodii str. 'Black Sea 11'	3	3	0	0	0	3	0	0	0
NC_011365.1	272568	Gluconacetobacter diazotrophicus PA1 5	4	3	0	0	0	3	0	0	0
NZ_CP007133.1	1248903	Escherichia coli O145:H28 str. RM12761	3	2	0	0	0	2	0	0	0
NC_018010.1	866536	Belliella baltica DSM 15883	1	1	0	0	0	1	0	0	0
NZ_CP013287.1	1639	Listeria monocytogenes	0	0	0	0	0	0	0	0	0
NZ_CP009217.1	1528098	Rickettsiales bacterium Ac37b	0	0	0	0	0	0	0	0	0
NC_002678.2	266835	Mesorhizobium loti MAFF303099	4	4	0	0	0	4	0	0	0
NC_002163.1	192222	Campylobacter jejuni subsp. jejuni NCTC 11168 = ATCC 700819	0	0	0	0	0	0	0	0	0
NC_015460.1	1005058	Gallibacterium anatis UMN179	2	1	0	0	0	1	0	0	0
NZ_CP009927.1	1719	Corynebacterium pseudotuberculosis	1	1	0	0	0	1	0	0	0
NZ_LN849008.1	520	Bordetella pertussis	5	5	0	0	0	2	0	1	0
NC_008344.1	335283	Nitrosomonas eutropha C91	1	1	0	0	0	1	0	0	0
NC_022780.1	1408206	Pediococcus pentosaceus SL4	2	1	0	0	0	1	0	0	0
NC_010172.1	419610	Methylobacterium extorquens PA1	0	0	0	0	0	0	0	0	0
NC_018001.1	768672	Desulfurococcus fermentans DSM 16532	1	1	0	0	0	1	0	0	0
NC_007951.1	266265	Burkholderia xenovorans LB400	6	6	0	0	0	6	0	0	0
NC_005773.3	264730	Pseudomonas savastanoi pv. phaseolicola 1448A	1	1	0	0	0	1	0	0	0
NC_017191.1	1034836	Bacillus amyloliquefaciens XH7	2	2	0	0	0	0	0	0	0
NC_013450.1	681288	Staphylococcus aureus subsp. aureus ED98	3	3	0	0	0	3	0	0	0
NC_010831.1	331678	Chlorobium phaeobacteroides BS1	1	1	0	0	0	1	0	0	0
NZ_CP011409.1	1262470	Herbaspirillum hiltneri N3	4	4	0	0	0	4	0	0	0
NC_022247.1	1246301	Variovorax paradoxus B4	3	3	0	0	0	3	0	0	0
NC_022538.1	1318466	Acholeplasma palmae J233	2	1	0	0	0	1	0	0	0
NC_018630.1	697283	Streptococcus pneumoniae gamPNI0373	1	1	0	0	0	0	0	0	0
NC_012804.1	593117	Thermococcus gammatolerans EJ3	3	3	0	0	0	3	0	0	0
NC_022082.1	1380908	Klebsiella pneumoniae JM45	5	2	0	0	0	2	0	0	0
NZ_CP007392.1	562	Escherichia coli	6	3	0	0	0	3	0	0	0
NC_003910.7	167879	Colwellia psychrerythraea 34H	4	3	0	0	0	3	0	0	0
NZ_CP012176.1	43687	Metallosphaera sedula	1	1	0	0	0	1	0	0	0
NZ_CP012109.1	1297742	Myxococcus sp. (contaminant ex DSM 436)	6	6	0	0	0	6	0	0	0
NZ_CP003949.1	543736	Rhodococcus opacus PD630	8	8	0	0	0	5	0	0	0
NC_014210.1	446468	Nocardiopsis dassonvillei subsp. dassonvillei DSM 43111	5	5	0	0	0	5	0	0	0
NC_017910.1	630626	Shimwellia blattae DSM 4481 = NBRC 105725	1	1	0	0	0	1	0	0	0
NZ_CP012805.1	1328	Streptococcus anginosus	0	0	0	0	0	0	0	0	0
NC_017920.1	416344	Burkholderia sp. KJ006	6	5	0	0	0	1	0	1	0
NC_021810.1	1124936	Salmonella enterica subsp. enterica serovar Heidelberg str. 41578	3	3	0	0	0	3	0	0	0
NZ_CP013130.1	60520	Lactobacillus paraplantarum	5	5	0	0	0	5	0	0	0
NZ_CP007657.1	1280	Staphylococcus aureus	0	0	0	0	0	0	0	0	0
NZ_CP009500.1	65058	Corynebacterium ulcerans	0	0	0	0	0	0	0	0	0
NC_013361.1	573235	Escherichia coli O26:H11 str. 11368	5	1	0	0	0	1	0	0	0
NZ_CP007247.1	1412455	Salmonella enterica subsp. enterica serovar Enteritidis str. EC20110221	0	0	0	0	0	0	0	0	0
NC_009699.1	441772	Clostridium botulinum F str. Langeland	2	2	0	0	0	2	0	0	0
NZ_CP011989.1	1284802	Klebsiella pneumoniae UHKPC33	1	1	0	0	0	1	0	0	0
NZ_CP009781.1	1453495	Yersinia aldovae 670-83	1	0	0	1	0	0	0	1	0
NC_014216.1	589865	Desulfurivibrio alkaliphilus AHT 2	0	0	0	0	0	0	0	0	0
NC_010830.1	452471	Candidatus Amoebophilus asiaticus 5a2	0	0	0	0	0	0	0	0	0
NC_016051.1	246969	Thermococcus sp. AM4	1	1	0	0	0	1	0	0	0
NZ_CP007668.1	935590	Neisseria meningitidis M0579	4	4	0	0	0	3	0	0	0
NC_002488.3	160492	Xylella fastidiosa 9a5c	1	1	0	0	0	1	0	0	0
NZ_CP010406.1	1446792	Bacillus sp. Pc3	1	1	0	0	0	0	0	0	0
NC_018587.1	932919	Listeria monocytogenes SLCC2755	4	4	0	0	0	4	0	0	0
NC_014844.1	643562	Desulfovibrio aespoeensis Aspo-2	7	7	0	0	0	7	0	0	0
NZ_CP003679.1	1095955	Treponema pallidum subsp. pallidum str. Sea 81-4	0	0	0	0	0	0	0	0	0
NZ_CP010540.1	1263761	Mycoplasma pneumoniae 39443	1	1	0	0	0	1	0	0	0
NC_020911.1	391626	Octadecabacter antarcticus 307	6	6	0	0	0	6	0	0	0
NC_016797.1	1112912	Brucella suis VBI22	3	3	0	0	0	0	0	0	0
NC_014618.1	701347	Enterobacter lignolyticus SCF1	3	3	0	0	0	3	0	0	0
NC_018681.1	1133849	Nocardia brasiliensis ATCC 700358	4	4	0	0	0	4	0	0	0
NZ_CP012649.1	1661	Trueperella pyogenes	3	3	0	0	0	3	0	0	0
NC_022998.1	1276258	Spiroplasma apis B31	0	0	0	0	0	0	0	0	0
NC_015576.1	875328	Mycobacterium sinense	4	3	0	0	0	3	0	0	0
NZ_CP006934.1	1276257	Spiroplasma sabaudiense Ar-1343	0	0	0	0	0	0	0	0	0
NC_013525.1	525904	Thermobaculum terrenum ATCC BAA-798	1	1	0	0	0	1	0	0	0
NC_007797.1	212042	Anaplasma phagocytophilum str. HZ	0	0	0	0	0	0	0	0	0
NC_016930.1	481009	Rickettsia philipii str. 364D	0	0	0	0	0	0	0	0	0
NZ_CP009084.2	149539	Salmonella enterica subsp. enterica serovar Enteritidis	2	2	0	0	0	2	0	0	0
NC_012582.1	345073	Vibrio cholerae O395	1	1	0	0	0	1	0	0	0
NZ_CP008747.1	1284	Staphylococcus hyicus	1	1	0	0	0	1	0	0	0
NC_020568.1	1074919	Staphylococcus aureus subsp. aureus ST228	0	0	0	0	0	0	0	0	0
NZ_LN831039.1	1772	Mycobacterium smegmatis	2	2	0	0	0	2	0	0	0
NZ_CP007805.1	1295140	Haemophilus influenzae CGSHiCZ412602	1	0	0	0	0	0	0	0	0
NC_010939.1	537457	Actinobacillus pleuropneumoniae serovar 7 str. AP76	1	1	0	0	0	1	0	0	0
NZ_CP011526.1	1241616	Staphylococcus aureus subsp. aureus DSM 20231	2	2	0	0	0	2	0	0	0
NC_021714.1	1300259	Alteromonas macleodii str. 'Ionian Sea UM4b'	2	2	0	0	0	1	0	0	0
NZ_CP012266.1	1159554	Cronobacter dublinensis subsp. dublinensis LMG 23823	6	6	0	0	0	5	0	0	0
NC_017030.1	1144275	Corallococcus coralloides DSM 2259	8	8	0	0	0	8	0	0	0
NC_022353.2	1383068	Campylobacter jejuni subsp. jejuni 00-2544	4	3	0	0	0	2	0	0	0
NZ_CP007243.1	1441628	Leptospirillum ferriphilum YSK	2	2	0	0	0	1	0	0	0
NZ_CP009459.1	158822	Cedecea neteri	4	4	0	0	0	4	0	0	0
NC_014483.2	349520	Paenibacillus polymyxa E681	6	6	0	0	0	5	0	0	0
NC_009636.1	366394	Sinorhizobium medicae WSM419	3	3	0	0	0	3	0	0	0
NZ_CP005960.1	1147786	Pseudomonas mandelii JR-1	4	4	0	0	0	4	0	0	0
NC_008022.1	370552	Streptococcus pyogenes MGAS10270	2	2	0	0	0	2	0	0	0
NZ_HG939456.1	342616	Streptococcus agalactiae COH1	2	2	0	0	0	1	0	0	0
NC_022041.1	1367847	Paracoccus aminophilus JCM 7686	3	3	0	0	0	3	0	0	0
NZ_CP009278.1	1538644	Sphingobacterium sp. ML3W	6	5	0	0	0	5	0	0	0
NC_018024.1	891968	Anaerobaculum mobile DSM 13181	2	2	0	0	0	2	0	0	0
NC_009883.1	391896	Rickettsia bellii OSU 85-389	0	0	0	0	0	0	0	0	0
NC_008212.1	362976	Haloquadratum walsbyi DSM 16790	0	0	0	0	0	0	0	0	0
NZ_CP011113.1	562	Escherichia coli	3	1	0	0	0	1	0	0	0
NZ_CP013120.1	1160720	Alteromonas stellipolaris LMG 21856	5	4	0	0	0	4	0	0	0
NC_019048.1	1231389	Streptococcus agalactiae SA20-06	0	0	0	0	0	0	0	0	0
NZ_CP011217.1	1308	Streptococcus thermophilus	1	1	0	0	0	1	0	0	0
NZ_CP009228.1	221027	Treponema putidum	2	2	0	0	0	2	0	0	0
NC_020529.1	1074919	Staphylococcus aureus subsp. aureus ST228	4	3	0	0	0	2	0	0	0
NC_009077.1	164757	Mycobacterium sp. JLS	3	2	0	0	0	1	0	0	0
NC_017278.1	1111069	Thermus sp. CCB_US3_UF1	0	0	0	0	0	0	0	0	0
NC_009674.1	315749	Bacillus cytotoxicus NVH 391-98	1	1	0	0	0	1	0	0	0
NZ_AP012544.1	219334	Lactobacillus casei subsp. casei ATCC 393	2	2	0	0	0	2	0	0	0
NC_019962.1	797303	Natrinema pellirubrum DSM 15624	4	4	0	0	0	4	0	0	0
NC_017586.1	1003195	Streptomyces cattleya NRRL 8057 = DSM 46488	4	4	0	0	0	4	0	0	0
NZ_CP012264.1	1073999	Cronobacter condimenti 1330	4	4	0	0	0	4	0	0	0
NC_017524.1	707235	Mycobacterium tuberculosis CTRI-2	2	2	0	0	0	0	0	0	0
NC_016831.1	1081093	Salmonella enterica subsp. enterica serovar Gallinarum/pullorum str. RKS5078	2	2	0	0	0	2	0	0	0
NC_010677.1	441952	Francisella tularensis subsp. mediasiatica FSC147	2	0	0	0	0	0	0	0	0
NC_014330.1	759914	Brachyspira pilosicoli 95/1000	2	2	0	0	0	2	0	0	0
NZ_AABW01000001.1	272951	Rickettsia sibirica 246	2	2	0	0	0	0	0	1	0
NC_013943.1	522772	Denitrovibrio acetiphilus DSM 12809	2	2	0	0	0	2	0	0	0
NC_008593.1	386415	Clostridium novyi NT	1	1	0	0	0	1	0	0	0
NC_012026.1	320483	Anaplasma marginale str. Florida	0	0	0	0	0	0	0	0	0
NC_021898.1	907271	Chlamydia trachomatis RC-J/966	0	0	0	0	0	0	0	0	0
NC_010794.1	481448	Methylacidiphilum infernorum V4	2	2	0	0	0	2	0	0	0
NC_022657.1	1246995	Actinoplanes friuliensis DSM 7358	7	7	0	0	0	7	0	0	0
NC_016893.1	1142511	Wigglesworthia glossinidia endosymbiont of Glossina morsitans morsitans (Yale colony)	1	0	0	0	0	0	0	0	0
NZ_CP007618.1	1392	Bacillus anthracis	4	4	0	0	0	1	0	1	0
NC_016511.1	1114969	Propionibacterium acnes TypeIA2 P.acn31	2	2	0	0	0	2	0	0	0
NZ_CP007528.1	886715	Salmonella enterica subsp. enterica serovar Enteritidis str. CDC_2010K_0968	3	3	0	0	0	3	0	0	0
NC_005072.1	59919	Prochlorococcus marinus subsp. pastoris str. CCMP1986	0	0	0	0	0	0	0	0	0
NZ_LN831024.1	287	Pseudomonas aeruginosa	6	6	0	0	0	6	0	0	0
NC_016776.1	862962	Bacteroides fragilis 638R	6	6	0	0	0	6	0	0	0
NC_017328.1	591020	Shigella flexneri 2002017	1	1	0	0	0	1	0	0	0
NZ_LN847000.1	83558	Chlamydia pneumoniae	1	1	0	0	0	1	0	0	0
NZ_CP007659.1	46170	Staphylococcus aureus subsp. aureus	1	1	0	0	0	1	0	0	0
NZ_CP007606.1	210	Helicobacter pylori	0	0	0	0	0	0	0	0	0
NZ_CP006918.1	1420013	Klebsiella pneumoniae 30684/NJST258_2	1	1	0	0	0	0	0	0	0
NZ_CP012479.1	1704044	Arthrobacter sp. ERGS1:01	5	5	0	0	0	5	0	0	0
NC_015848.1	1048245	Mycobacterium canettii CIPT 140010059	2	2	0	0	0	0	0	0	0
NC_004917.1	235279	Helicobacter hepaticus ATCC 51449	0	0	0	0	0	0	0	0	0
NZ_CP012697.1	1714373	Microbacterium sp. No. 7	3	3	0	0	0	3	0	0	0
NZ_CP007394.1	562	Escherichia coli	2	1	0	0	0	1	0	0	0
NZ_CP011005.1	1618207	Arthrobacter sp. IHBB 11108	2	2	0	0	0	2	0	0	0
NZ_CP006748.1	1345708	Yersinia pestis 8787	2	2	0	0	0	0	0	0	0
NZ_LN879429.1	38323	Bartonella henselae	3	3	0	0	0	3	0	0	0
NZ_AFXK01000001.1	1051004	Pseudomonas aeruginosa 213BR	3	3	0	0	0	3	0	0	0
NC_014394.1	395494	Gallionella capsiferriformans ES-2	2	2	0	0	0	2	0	0	0
NC_020133.1	459424	Mycobacterium liflandii 128FXT	3	3	0	0	0	1	0	0	0
NZ_CP004097.1	1241582	Burkholderia thailandensis 2002721723	5	5	0	0	0	2	0	1	0
NC_017544.1	393133	Listeria monocytogenes 10403S	1	1	0	0	0	1	0	0	0
NZ_CP007562.1	1314	Streptococcus pyogenes	0	0	0	0	0	0	0	0	0
NC_017382.1	290847	Helicobacter pylori 51	1	1	0	0	0	1	0	0	0
NZ_AP014613.1	1113728	Alcanivorax sp. NBRC 101098	0	0	0	0	0	0	0	0	0
NC_009698.1	441771	Clostridium botulinum A str. Hall	0	0	0	0	0	0	0	0	0
NZ_CP007631.1	1311	Streptococcus agalactiae	3	2	0	0	0	2	0	0	0
NZ_CP012004.1	470	Acinetobacter baumannii	1	1	0	0	0	1	0	0	0
NC_008599.1	360106	Campylobacter fetus subsp. fetus 82-40	2	2	0	0	0	2	0	0	0
NZ_CP003923.1	1246626	Bacillus lehensis G1	3	3	0	0	0	3	0	0	0
NC_013595.1	479432	Streptosporangium roseum DSM 43021	5	5	0	0	0	5	0	0	0
NZ_CP012173.1	43687	Metallosphaera sedula	1	1	0	0	0	1	0	0	0
NC_021991.1	1266844	Acetobacter pasteurianus 386B	3	2	0	0	0	2	0	0	0
NZ_CP007726.1	546263	Neisseria elongata subsp. glycolytica ATCC 29315	1	1	0	0	0	1	0	0	0
NZ_CP007573.1	1328	Streptococcus anginosus	1	1	0	0	0	1	0	0	0
NC_022223.1	882944	Listonella anguillarum M3	4	3	0	0	0	3	0	0	0
NC_014721.1	632335	Caldicellulosiruptor kristjanssonii I77R1B	2	2	0	0	0	1	0	0	0
NZ_CP006003.1	1334629	Myxococcus fulvus 124B02	14	13	0	0	0	13	0	0	0
NC_021814.1	1271862	Salmonella enterica subsp. enterica serovar Typhimurium var. 5- str. CFSAN001921	2	2	0	0	0	2	0	0	0
NZ_CP012029.1	280505	Leptospira borgpetersenii serovar Ballum	1	1	0	0	0	1	0	0	0
NZ_CP010547.1	1263763	Mycoplasma pneumoniae M1139	0	0	0	0	0	0	0	0	0
NC_016751.1	443254	Marinitoga piezophila KA3	1	1	0	0	0	1	0	0	0
NC_018498.1	662947	Mycoplasma genitalium M2288	0	0	0	0	0	0	0	0	0
NC_011146.1	404380	Geobacter bemidjiensis Bem	2	2	0	0	0	2	0	0	0
NC_020812.1	349215	Micavibrio aeruginosavorus EPB	1	1	0	0	0	1	0	0	0
NC_009882.1	392021	Rickettsia rickettsii str. 'Sheila Smith'	1	1	0	0	0	1	0	0	0
NZ_CP008760.1	266265	Burkholderia xenovorans LB400	1	1	0	0	0	1	0	0	0
NC_004567.2	220668	Lactobacillus plantarum WCFS1	3	3	0	0	0	3	0	0	0
NZ_CP007202.1	1454006	Siansivirga zeaxanthinifaciens CC-SAMT-1	4	2	0	0	0	2	0	0	0
NC_013165.1	471855	Slackia heliotrinireducens DSM 20476	1	1	0	0	0	1	0	0	0
NZ_CP009427.1	1773	Mycobacterium tuberculosis	0	0	0	0	0	0	0	0	0
NC_017375.1	585538	Helicobacter pylori 83	1	1	0	0	0	1	0	0	0
NZ_CP004351.1	1285583	Corynebacterium casei LMG S-19264	3	3	0	0	0	3	0	0	0
NZ_CP005986.1	637389	Acidithiobacillus caldus ATCC 51756	2	2	0	0	0	2	0	0	0
NZ_CCSE01000001.1	1461582	Jeotgalicoccus sp. 13MG44_air	2	1	0	0	0	1	0	0	0
NZ_CP010052.1	224308	Bacillus subtilis subsp. subtilis str. 168	6	5	0	0	0	0	0	0	0
NC_009486.1	390874	Thermotoga petrophila RKU-1	0	0	0	0	0	0	0	0	0
NZ_CP011442.1	520	Bordetella pertussis	6	6	0	0	0	1	0	0	0
NC_015172.1	645991	Syntrophobotulus glycolicus DSM 8271	0	0	0	0	0	0	0	0	0
NZ_CP006659.1	1263871	Klebsiella pneumoniae ATCC BAA-2146	3	2	0	0	0	1	0	0	0
NZ_AHJK01000001.1	1132497	Sulfolobus islandicus M.16.2	3	3	0	0	0	3	0	0	0
NZ_CP008695.1	1314	Streptococcus pyogenes	2	1	0	0	0	1	0	0	0
NC_017200.1	930170	Bacillus thuringiensis serovar finitimus YBT-020	3	3	0	0	0	0	0	0	0
NZ_AP012326.1	1150423	Bifidobacterium dentium JCM 1195 = DSM 20436	5	5	0	0	0	5	0	0	0
NC_014909.2	859654	Candidatus Blochmannia vafer str. BVAF	0	0	0	0	0	0	0	0	0
NZ_CP007139.1	661478	Fimbriimonas ginsengisoli Gsoil 348	3	2	0	0	0	2	0	0	0
NC_011900.1	561276	Streptococcus pneumoniae ATCC 700669	2	2	0	0	0	1	0	0	0
NC_014392.1	608506	Caldicellulosiruptor obsidiansis OB47	1	1	0	0	0	1	0	0	0
NC_019386.1	751945	Thermus oshimai JL-2	1	1	0	0	0	1	0	0	0
NZ_CP007494.1	1247649	Bordetella holmesii ATCC 51541	1	1	0	0	0	1	0	0	0
NC_016613.1	1116375	Vibrio sp. EJY3	2	2	0	0	0	2	0	0	0
NZ_CP008995.1	611301	Xanthomonas citri subsp. citri	1	1	0	0	0	0	0	0	0
NC_004663.1	226186	Bacteroides thetaiotaomicron VPI-5482	7	6	0	0	0	6	0	0	0
NC_021897.1	907268	Chlamydia trachomatis RC-L2(s)/3	0	0	0	0	0	0	0	0	0
NZ_CP011118.1	630	Yersinia enterocolitica	4	4	0	0	0	4	0	0	0
NC_009778.1	290339	Cronobacter sakazakii ATCC BAA-894	4	3	0	0	0	1	0	0	0
NZ_CP011131.1	262324	Lysobacter gummosus	3	3	0	0	0	3	0	0	0
NC_008570.1	380703	Aeromonas hydrophila subsp. hydrophila ATCC 7966	1	1	0	0	0	1	0	0	0
NC_010169.1	470137	Brucella suis ATCC 23445	1	1	0	0	0	0	0	0	0
NZ_CP009450.1	61647	Pluralibacter gergoviae	5	5	0	0	0	5	0	0	0
NC_009488.1	357244	Orientia tsutsugamushi str. Boryong	1	1	0	0	0	1	0	0	0
NZ_CP012160.1	1458307	Octadecabacter temperatus	3	3	0	0	0	3	0	0	0
NC_006570.2	177416	Francisella tularensis subsp. tularensis SCHU S4	1	1	0	0	0	1	0	0	0
NC_015703.1	761193	Runella slithyformis DSM 19594	8	8	0	0	0	8	0	0	0
NC_008209.1	375451	Roseobacter denitrificans OCh 114	1	1	0	0	0	0	0	0	0
NC_012785.1	521045	Kosmotoga olearia TBF 19.5.1	2	2	0	0	0	2	0	0	0
NZ_CP006686.1	1385723	Campylobacter jejuni subsp. jejuni NCTC 11168-Kf1	0	0	0	0	0	0	0	0	0
NZ_CP011278.1	1390	Bacillus amyloliquefaciens	3	3	0	0	0	0	0	0	0
NZ_CP007142.1	1445510	Gynuella sunshinyii YC6258	4	4	0	0	0	4	0	0	0
NZ_CP011428.1	59201	Salmonella enterica subsp. enterica	1	1	0	0	0	1	0	0	0
NC_014639.1	720555	Bacillus atrophaeus 1942	0	0	0	0	0	0	0	0	0
NZ_CP006944.1	1434214	Mannheimia varigena USDA-ARS-USMARC-1312	2	2	0	0	0	2	0	0	0
NZ_CP009049.1	54388	Salmonella enterica subsp. enterica serovar Paratyphi A	4	4	0	0	0	4	0	0	0
NZ_CP011958.1	129394	Xanthomonas oryzae pv. oryzicola	0	0	0	0	0	0	0	0	0
NC_014375.1	633149	Brevundimonas subvibrioides ATCC 15264	2	2	0	0	0	2	0	0	0
NC_017951.1	1071762	Chlamydia trachomatis F/SW4	1	1	0	0	0	1	0	0	0
NZ_CP010556.1	1390	Bacillus amyloliquefaciens	0	0	0	0	0	0	0	0	0
NZ_CP006910.1	1427374	Streptococcus agalactiae CNCTC 10/84	2	2	0	0	0	2	0	0	0
NC_017743.1	1127744	Bacillus sp. JS	2	1	0	0	0	1	0	0	0
NC_008027.1	384676	Pseudomonas entomophila L48	3	3	0	0	0	2	0	0	0
NC_009142.1	405948	Saccharopolyspora erythraea NRRL 2338	5	4	0	1	0	4	0	0	0
NC_017728.1	1126011	Listeria monocytogenes 07PF0776	3	3	0	0	0	3	0	0	0
NC_015948.1	634497	Haloarcula hispanica ATCC 33960	2	1	0	0	0	1	0	0	0
NZ_CP011267.1	113653	Geoglobus ahangari	3	3	0	0	0	3	0	0	0
NC_021200.1	1199187	Mycobacterium avium subsp. paratuberculosis MAP4	2	2	0	0	0	2	0	0	0
NC_009637.1	426368	Methanococcus maripaludis C7	1	1	0	0	0	1	0	0	0
NC_012803.1	465515	Micrococcus luteus NCTC 2665	2	2	0	0	0	2	0	0	0
NC_008024.1	370554	Streptococcus pyogenes MGAS10750	0	0	0	0	0	0	0	0	0
NC_009616.1	391009	Thermosipho melanesiensis BI429	3	3	0	0	0	3	0	0	0
NZ_CP012144.1	90371	Salmonella enterica subsp. enterica serovar Typhimurium	1	1	0	0	0	1	0	0	0
NC_009634.1	406327	Methanococcus vannielii SB	0	0	0	0	0	0	0	0	0
NC_018522.1	1193292	Klebsiella pneumoniae subsp. pneumoniae 1084	3	3	0	0	0	2	0	0	0
NC_009697.1	441770	Clostridium botulinum A str. ATCC 19397	1	1	0	0	0	0	0	0	0
NZ_CP012475.1	79880	Bacillus clausii	4	4	0	0	0	4	0	0	0
NZ_ARWD01000001.1	1006598	Serratia plymuthica RVH1	3	3	0	0	0	1	0	0	0
NC_006908.1	267748	Mycoplasma mobile 163K	0	0	0	0	0	0	0	0	0
NZ_CP010525.1	1398	Bacillus coagulans	3	3	0	0	0	3	0	0	0
NC_020388.1	268739	Natronomonas moolapensis 8.8.11	2	1	0	0	0	1	0	0	0
NC_012489.1	379066	Gemmatimonas aurantiaca T-27	3	3	0	0	0	3	0	0	0
NC_023065.1	1430440	Magnetospirillum gryphiswaldense MSR-1 v2	1	1	0	0	0	1	0	0	0
NZ_CP009493.1	1299330	Mycobacterium avium subsp. avium 2285 (R)	4	4	0	0	0	4	0	0	0
NC_022544.1	568709	Salmonella enterica subsp. enterica serovar Typhimurium str. DT2	3	3	0	0	0	3	0	0	0
NC_008023.1	370553	Streptococcus pyogenes MGAS2096	0	0	0	0	0	0	0	0	0
NZ_CP002703.1	1009859	Buchnera aphidicola str. F009 (Myzus persicae)	1	0	0	0	0	0	0	0	0
NC_014500.1	198628	Dickeya dadantii 3937	6	6	0	0	0	6	0	0	0
NC_008312.1	203124	Trichodesmium erythraeum IMS101	5	4	0	0	0	4	0	0	0
NZ_CP009761.1	33033	Parvimonas micra	0	0	0	0	0	0	0	0	0
NC_012526.1	546414	Deinococcus deserti VCD115	4	4	0	0	0	4	0	0	0
NC_014666.1	298654	Frankia sp. EuI1c	9	9	0	0	0	9	0	0	0
NC_007908.1	338969	Rhodoferax ferrireducens T118	0	0	0	0	0	0	0	0	0
NZ_CP010836.1	1609977	Sphingomonas hengshuiensis	2	2	0	0	0	2	0	0	0
NC_013016.1	662598	Neisseria meningitidis alpha14	1	1	0	0	0	1	0	0	0
NZ_CP010402.1	46170	Staphylococcus aureus subsp. aureus	1	1	0	0	0	1	0	0	0
NC_011498.1	570508	Helicobacter pylori P12	1	1	0	0	0	1	0	0	0
NZ_CP011058.1	1126833	Paenibacillus beijingensis	2	2	0	0	0	2	0	0	0
NC_015713.1	331113	Simkania negevensis Z	0	0	0	0	0	0	0	0	0
NC_007779.1	316407	Escherichia coli str. K-12 substr. W3110	4	2	0	0	0	2	0	0	0
NZ_CP008841.1	571	Klebsiella oxytoca	2	2	0	0	0	2	0	0	0
NC_013169.1	478801	Kytococcus sedentarius DSM 20547	1	1	0	0	0	1	0	0	0
NZ_CP011452.2	1267766	Altererythrobacter atlanticus	1	1	0	0	0	1	0	0	0
NC_021905.1	1328306	Rhizobium etli bv. mimosae str. Mim1	5	5	0	0	0	5	0	0	0
NC_014751.1	880447	Mycoplasma leachii PG50	0	0	0	0	0	0	0	0	0
NZ_CP011536.1	1381124	Lactobacillus fermentum 3872	2	2	0	0	0	2	0	0	0
NZ_CP006713.1	1385940	Bifidobacterium breve JCM 7019	1	1	0	0	0	0	0	0	0
NZ_CP012513.1	600	Salmonella enterica subsp. enterica serovar Thompson	3	3	0	0	0	3	0	0	0
NC_013893.1	698737	Staphylococcus lugdunensis HKU09-01	0	0	0	0	0	0	0	0	0
NC_016783.1	698972	Corynebacterium diphtheriae INCA 402	1	1	0	0	0	1	0	0	0
NZ_CP009144.1	382	Sinorhizobium meliloti	5	5	0	0	0	5	0	0	0
NC_009441.1	376686	Flavobacterium johnsoniae UW101	1	1	0	0	0	1	0	0	0
NZ_CP012074.1	1236517	Prevotella fusca JCM 17724	3	2	0	0	0	2	0	0	0
NC_014774.1	658172	Candidatus Liberibacter solanacearum CLso-ZC1	0	0	0	0	0	0	0	0	0
NC_013729.1	479435	Kribbella flavida DSM 17836	4	4	0	0	0	4	0	0	0
NZ_CP009451.1	158822	Cedecea neteri	3	3	0	0	0	3	0	0	0
NZ_CP009256.1	470	Acinetobacter baumannii	4	4	0	0	0	4	0	0	0
NC_023150.1	1435356	Rhodococcus pyridinivorans SB3094	2	2	0	0	0	2	0	0	0
NZ_CP006571.1	1229831	Chlamydia avium 10DC88	1	1	0	0	0	1	0	0	0
NC_015714.1	545776	Treponema paraluiscuniculi Cuniculi A	2	2	0	0	0	0	0	0	0
NZ_CP007252.1	1244121	Salmonella enterica subsp. enterica serovar Enteritidis str. EC20111175	2	2	0	0	0	2	0	0	0
NZ_CP010445.1	83333	Escherichia coli K-12	1	0	0	0	0	0	0	0	0
NZ_CP006664.1	667120	Edwardsiella tarda 080813	0	0	0	0	0	0	0	0	0
NC_015389.1	700015	Coriobacterium glomerans PW2	3	3	0	0	0	3	0	0	0
NZ_CP007063.1	457405	Fusobacterium nucleatum subsp. animalis 7_1	2	2	0	0	0	2	0	0	0
NC_008825.1	420662	Methylibium petroleiphilum PM1	2	2	0	0	0	2	0	0	0
NZ_CP010528.1	1590	Lactobacillus plantarum	1	1	0	0	0	1	0	0	0
NC_021733.1	1096996	Acinetobacter baumannii BJAB0715	2	2	0	0	0	2	0	0	0
NC_013642.1	590168	Thermotoga naphthophila RKU-10	0	0	0	0	0	0	0	0	0
NZ_CP008891.1	1306417	Burkholderia pseudomallei MSHR5858	3	3	0	0	0	1	0	0	0
NZ_CP012028.1	485	Neisseria gonorrhoeae	3	3	0	0	0	3	0	0	0
NC_015437.1	546271	Selenomonas sputigena ATCC 35185	0	0	0	0	0	0	0	0	0
NC_018631.1	1229756	Leuconostoc gelidum JB7	5	4	0	0	0	4	0	0	0
NZ_CP009323.1	28095	Burkholderia gladioli	5	5	0	0	0	5	0	0	0
NC_018224.1	406552	Natrinema sp. J7-2	2	1	0	0	0	1	0	0	0
NC_009633.1	293826	Alkaliphilus metalliredigens QYMF	4	4	0	0	0	4	0	0	0
NC_013715.1	680646	Rothia mucilaginosa DY-18	0	0	0	0	0	0	0	0	0
NC_004116.1	208435	Streptococcus agalactiae 2603V/R	1	1	0	0	0	1	0	0	0
NC_006576.1	269084	Synechococcus elongatus PCC 6301	0	0	0	0	0	0	0	0	0
NC_016001.1	1034807	Flavobacterium branchiophilum FL-15	3	2	0	0	0	2	0	0	0
NC_022516.1	1380773	Streptococcus suis YB51	0	0	0	0	0	0	0	0	0
NZ_CP006630.1	1368166	Staphylococcus aureus subsp. aureus SA268	2	2	0	0	0	1	0	0	0
NC_017547.1	393127	Listeria monocytogenes Finland 1998	9	9	0	0	0	8	0	0	0
NC_017317.1	945711	Corynebacterium ulcerans 809	3	3	0	0	0	3	0	0	0
NC_016894.1	931626	Acetobacterium woodii DSM 1030	1	1	0	0	0	1	0	0	0
NZ_CP009301.1	313590	Dokdonia sp. MED134	3	3	0	0	0	3	0	0	0
NC_017067.1	1163748	Marinobacter hydrocarbonoclasticus ATCC 49840	3	3	0	0	0	3	0	0	0
NZ_CP006951.1	1432061	Dehalococcoides mccartyi CG5	2	2	0	0	0	2	0	0	0
NC_020387.1	1193806	Dehalococcoides mccartyi BTF08	0	0	0	0	0	0	0	0	0
NZ_CP009504.1	1434102	Methanosarcina sp. WH1	2	2	0	0	0	0	0	0	0
NC_020913.1	1236689	Candidatus Methanomethylophilus alvus Mx1201	0	0	0	0	0	0	0	0	0
NC_010644.1	445932	Elusimicrobium minutum Pei191	2	2	0	0	0	2	0	0	0
NZ_CP007656.1	959	Bdellovibrio bacteriovorus	2	2	0	0	0	2	0	0	0
NZ_CP011934.1	214675	Leptospira interrogans serovar Manilae	2	2	0	0	0	2	0	0	0
NZ_CP006715.1	1385942	Bifidobacterium breve 689b	1	1	0	0	0	1	0	0	0
NZ_AP014622.1	287	Pseudomonas aeruginosa	7	7	0	0	0	7	0	0	0
NC_005362.1	257314	Lactobacillus johnsonii NCC 533	1	1	0	0	0	0	0	0	0
NZ_CP012591.1	669502	Candidatus Profftella armatura	0	0	0	0	0	0	0	0	0
NZ_CP009552.1	565033	Geoglobus acetivorans	1	1	0	0	0	1	0	0	0
NC_023149.1	1427342	Pseudomonas aeruginosa SCV20265	2	2	0	0	0	2	0	0	0
NC_006138.1	177439	Desulfotalea psychrophila LSv54	4	3	0	0	0	3	0	0	0
NC_007294.1	262723	Mycoplasma synoviae 53	0	0	0	0	0	0	0	0	0
NC_017381.1	985080	Helicobacter pylori 2018	0	0	0	0	0	0	0	0	0
NZ_LN649235.1	595	Salmonella enterica subsp. enterica serovar Infantis	0	0	0	0	0	0	0	0	0
NC_017361.1	907239	Helicobacter pylori SouthAfrica7	0	0	0	0	0	0	0	0	0
NZ_CP007037.1	1435046	Shigella flexneri G1663	2	1	0	0	0	1	0	0	0
NC_002932.3	194439	Chlorobium tepidum TLS	2	2	0	0	0	2	0	0	0
NC_016584.1	768706	Desulfosporosinus orientis DSM 765	4	4	0	0	0	4	0	0	0
NC_018027.1	710421	Mycobacterium chubuense NBB4	6	5	0	0	0	5	0	0	0
NZ_LN626917.1	1280	Staphylococcus aureus	0	0	0	0	0	0	0	0	0
NC_005295.2	254945	Ehrlichia ruminantium str. Welgevonden	0	0	0	0	0	0	0	0	0
NC_008783.1	360095	Bartonella bacilliformis KC583	0	0	0	0	0	0	0	0	0
NC_012578.1	579112	Vibrio cholerae M66-2	1	1	0	0	0	1	0	0	0
NC_020514.1	1129794	Paraglaciecola psychrophila 170	5	5	0	0	0	5	0	0	0
NC_014650.1	581103	Geobacillus sp. Y4.1MC1	1	1	0	0	0	0	0	0	0
NZ_CP008739.1	1400868	Pseudomonas aeruginosa VRFPA04	3	3	0	0	0	3	0	0	0
NC_009975.1	444158	Methanococcus maripaludis C6	2	2	0	0	0	2	0	0	0
NZ_CP006740.1	1401256	Xylella fastidiosa MUL0034	0	0	0	0	0	0	0	0	0
NC_021491.1	1331671	Pseudomonas putida H8234	2	2	0	0	0	2	0	0	0
NZ_CP011985.1	1284804	Klebsiella pneumoniae UHKPC07	2	2	0	0	0	1	0	0	0
NC_018644.1	744985	alpha proteobacterium HIMB59	0	0	0	0	0	0	0	0	0
NC_010511.1	426117	Methylobacterium sp. 4-46	3	3	0	0	0	3	0	0	0
NC_009767.1	383372	Roseiflexus castenholzii DSM 13941	4	4	0	0	0	4	0	0	0
NC_017349.1	985006	Staphylococcus aureus subsp. aureus LGA251	2	2	0	0	0	2	0	0	0
NZ_CP009612.1	1314	Streptococcus pyogenes	1	1	0	0	0	1	0	0	0
NC_016937.1	1001534	Francisella tularensis subsp. tularensis TI0902	1	1	0	0	0	1	0	0	0
NZ_CM001835.1	1159083	Streptococcus pneumoniae PCS8235	1	1	0	0	0	1	0	0	0
NC_021899.1	1007871	Chlamydia trachomatis RC-J/971	0	0	0	0	0	0	0	0	0
NZ_LN681225.1	449	Legionella hackeliae	0	0	0	0	0	0	0	0	0
NC_011901.1	396588	Thioalkalivibrio sulfidiphilus HL-EbGr7	2	2	0	0	0	2	0	0	0
NZ_CP011542.1	571915	Corynebacterium mustelae	1	1	0	0	0	1	0	0	0
NC_018867.1	1131462	Dehalobacter sp. CF	3	3	0	0	0	0	0	0	0
NZ_CP009538.1	272560	Burkholderia pseudomallei K96243	0	0	0	0	0	0	0	0	0
NC_012846.1	634504	Bartonella grahamii as4aup	2	2	0	0	0	2	0	0	0
NC_018656.1	1229909	Candidatus Nitrosopumilus sp. AR2	0	0	0	0	0	0	0	0	0
NC_016589.1	1097668	Burkholderia sp. YI23	7	6	0	0	0	2	0	0	0
NZ_CP008928.1	149539	Salmonella enterica subsp. enterica serovar Enteritidis	5	5	0	0	0	5	0	0	0
NC_020294.1	1208919	Candidatus Kinetoplastibacterium desouzaii TCC079E	0	0	0	0	0	0	0	0	0
NZ_CP009048.1	237609	Pseudomonas alkylphenolia	1	1	0	0	0	1	0	0	0
NZ_CP009935.1	349746	Yersinia pestis Angola	3	3	0	0	0	0	0	0	0
NC_003028.3	170187	Streptococcus pneumoniae TIGR4	0	0	0	0	0	0	0	0	0
NZ_CP012347.1	1029979	Salmonella enterica subsp. enterica serovar Pullorum str. ATCC 9120	3	2	0	0	0	2	0	0	0
NC_018679.1	1004787	Alteromonas macleodii str. 'Balearic Sea AD45'	1	1	0	0	0	1	0	0	0
NC_021082.1	1316932	Mannheimia haemolytica M42548	0	0	0	0	0	0	0	0	0
NC_014215.1	754252	Propionibacterium freudenreichii subsp. shermanii CIRM-BIA1	2	2	0	0	0	2	0	0	0
NZ_CP009923.1	813	Chlamydia trachomatis	0	0	0	0	0	0	0	0	0
NC_011047.1	37692	Candidatus Phytoplasma mali	2	1	0	0	0	1	0	0	0
NC_020990.1	457425	Streptomyces albus J1074	4	4	0	0	0	4	0	0	0
NZ_CP007503.1	34085	Riemerella anatipestifer	0	0	0	0	0	0	0	0	0
NZ_CP009083.1	149539	Salmonella enterica subsp. enterica serovar Enteritidis	2	2	0	0	0	2	0	0	0
NC_009483.1	351605	Geobacter uraniireducens Rf4	5	4	0	0	0	4	0	0	0
NZ_CP011320.1	562	Escherichia coli	2	1	0	1	0	1	0	1	0
NC_016147.2	1045855	Pseudoxanthomonas spadix BD-a59	3	3	0	0	0	3	0	0	0
NC_015565.1	868595	Desulfotomaculum carboxydivorans CO-1-SRB	0	0	0	0	0	0	0	0	0
NZ_CP009019.1	611301	Xanthomonas citri subsp. citri	3	3	0	0	0	0	0	0	0
NZ_CP010523.1	244366	Klebsiella variicola	2	2	0	0	0	0	0	0	0
NC_012659.1	592021	Bacillus anthracis str. A0248	3	3	0	0	0	2	0	0	0
NC_020540.2	1207470	Streptococcus pyogenes M1 476	2	2	0	0	0	2	0	0	0
NC_022569.1	85569	Salmonella enterica subsp. enterica serovar Typhimurium str. DT104	2	2	0	0	0	2	0	0	0
NZ_CP010551.1	1233262	Mycoplasma pneumoniae PO1	0	0	0	0	0	0	0	0	0
NC_008601.1	401614	Francisella tularensis subsp. novicida U112	1	1	0	0	0	1	0	0	0
NZ_CP010282.1	796731	Salmonella enterica subsp. enterica serovar Newport str. CVM 21538	2	2	0	0	0	2	0	0	0
NZ_CP009287.1	189425	Paenibacillus graminis	6	4	0	0	0	3	0	0	0
NZ_CP006929.1	1427366	Dickeya zeae EC1	2	2	0	0	0	2	0	0	0
NC_017378.1	1055528	Helicobacter pylori Puno120	0	0	0	0	0	0	0	0	0
NC_019792.1	797304	Natronobacterium gregoryi SP2	2	2	0	0	0	2	0	0	0
NZ_CP006949.1	1432059	Dehalococcoides mccartyi CG1	3	3	0	0	0	1	0	0	0
NZ_CP007241.1	1314	Streptococcus pyogenes	2	2	0	0	0	1	0	0	0
NC_010803.1	290315	Chlorobium limicola DSM 245	3	3	0	0	0	3	0	0	0
NC_010170.1	94624	Bordetella petrii	0	0	0	0	0	0	0	0	0
NZ_CP009001.1	611301	Xanthomonas citri subsp. citri	7	7	0	0	0	0	0	0	0
NZ_CP012508.1	1238	Piscirickettsia salmonis	8	8	0	0	0	8	0	0	0
NC_021725.1	1318634	Lactobacillus rhamnosus LOCK908	3	3	0	0	0	3	0	0	0
NC_022777.1	1231072	Clostridium tetani 12124569	3	3	0	0	0	3	0	0	0
NZ_CP011602.1	61648	Kluyvera intermedia	5	5	0	0	0	5	0	0	0
NC_017028.1	1105111	Candidatus Rickettsia amblyommii str. GAT-30V	1	1	0	0	0	0	0	0	0
NC_011666.1	395965	Methylocella silvestris BL2	3	3	0	0	0	3	0	0	0
NC_014923.1	765698	Mesorhizobium ciceri biovar biserrulae WSM1271	1	1	0	0	0	1	0	0	0
NC_023137.1	1423144	Phaeobacter gallaeciensis DSM 26640	4	3	0	0	0	3	0	0	0
NZ_CP011055.1	2287	Sulfolobus solfataricus	2	2	0	0	0	2	0	0	0
NZ_CP010281.1	796732	Salmonella enterica subsp. enterica serovar Newport str. CVM 22513	6	5	0	0	0	5	0	0	0
NC_017764.1	584721	Pasteurella multocida subsp. multocida str. 3480	3	3	0	0	0	3	0	0	0
NZ_CP012898.1	1736674	Algibacter sp. HZ22	4	4	0	0	0	4	0	0	0
NZ_CP012040.1	320787	Cyclobacterium amurskyense	4	4	0	0	0	4	0	0	0
NZ_CP006877.1	1418105	Rhizobium gallicum bv. gallicum R602	4	3	0	0	0	3	0	0	0
NC_000919.1	243276	Treponema pallidum subsp. pallidum str. Nichols	0	0	0	0	0	0	0	0	0
NZ_CP012675.1	585	Proteus vulgaris	3	3	0	0	0	0	0	0	0
NC_004350.2	210007	Streptococcus mutans UA159	4	4	0	0	0	4	0	0	0
NC_021028.1	869304	Streptococcus pneumoniae SPN034183	1	1	0	0	0	1	0	0	0
NC_014963.1	401053	Terriglobus saanensis SP1PR4	3	3	0	0	0	3	0	0	0
NZ_CP010973.1	28450	Burkholderia pseudomallei	3	3	0	0	0	2	0	0	0
NC_008578.1	351607	Acidothermus cellulolyticus 11B	1	1	0	0	0	1	0	0	0
NZ_CP009528.1	1434108	Methanosarcina barkeri MS	5	5	0	0	0	5	0	0	0
NC_014484.1	665571	Spirochaeta thermophila DSM 6192	2	2	0	0	0	2	0	0	0
NZ_CP011511.1	621	Shigella boydii	2	1	0	0	0	1	0	0	0
NC_012214.1	634499	Erwinia pyrifoliae Ep1/96	2	2	0	0	0	0	0	0	0
NZ_LN847353.1	1313	Streptococcus pneumoniae	2	2	0	0	0	2	0	0	0
NC_019815.1	1267577	Candidatus Kinetoplastibacterium crithidii (ex Angomonas deanei ATCC 30255)	1	0	0	0	0	0	0	0	0
NZ_CP010906.1	32022	Campylobacter jejuni subsp. jejuni	0	0	0	0	0	0	0	0	0
NZ_CP011071.1	516051	Muricauda lutaonensis	1	1	0	0	0	1	0	0	0
NC_020912.1	1280938	Pseudomonas aeruginosa B136-33	7	6	0	0	0	6	0	0	0
NC_011894.1	460265	Methylobacterium nodulans ORS 2060	3	3	0	0	0	3	0	0	0
NZ_CP009615.1	36809	Mycobacterium abscessus	3	3	0	0	0	3	0	0	0
NZ_CP012146.1	340	Xanthomonas campestris pv. campestris	1	1	0	0	0	1	0	0	0
NC_015276.1	717774	Marinomonas mediterranea MMB-1	6	6	0	0	0	6	0	0	0
NC_020533.1	1074919	Staphylococcus aureus subsp. aureus ST228	2	2	0	0	0	2	0	0	0
NC_017246.1	703352	Brucella melitensis M5-90	2	2	0	0	0	0	0	0	0
NZ_CP011304.1	1641812	Microcystis aeruginosa NIES-2549	5	5	0	0	0	4	0	0	0
NZ_CP007249.2	1412453	Salmonella enterica subsp. enterica serovar Enteritidis str. EC20090641	4	3	0	0	0	2	0	0	0
NC_020555.1	1206745	Helicobacter cinaedi ATCC BAA-847	1	1	0	0	0	1	0	0	0
NZ_CP008757.1	29461	Brucella suis	2	2	0	0	0	0	0	0	0
NC_017481.1	712961	Lactobacillus salivarius CECT 5713	1	1	0	0	0	1	0	0	0
NZ_CP009625.1	1210454	Brucella abortus 104M	2	2	0	0	0	0	0	0	0
NZ_CP009331.1	1392	Bacillus anthracis	5	3	0	0	0	0	0	0	0
NC_021892.1	907272	Chlamydia trachomatis J/6276tet1	2	0	0	0	0	0	0	0	0
NZ_CP011995.1	837	Porphyromonas gingivalis	2	2	0	0	0	2	0	0	0
NC_016784.1	1114958	Bacillus methylotrophicus CAU B946	4	4	0	0	0	1	0	0	0
NC_022530.1	1385727	Bacillus methylotrophicus NAU-B3	2	1	0	0	0	1	0	0	0
NC_008726.1	350058	Mycobacterium vanbaalenii PYR-1	1	1	0	0	0	1	0	0	0
NC_003901.1	192952	Methanosarcina mazei Go1	5	5	0	0	0	5	0	0	0
NC_017431.1	707183	Chlamydia trachomatis E/11023	1	1	0	0	0	1	0	0	0
NZ_LN831035.1	727	Haemophilus influenzae	0	0	0	0	0	0	0	0	0
NC_017031.1	1117942	Corynebacterium pseudotuberculosis P54B96	1	1	0	0	0	1	0	0	0
NZ_CP009628.1	526977	Bacillus cereus ATCC 4342	3	3	0	0	0	2	0	0	0
NZ_CP010567.1	813	Chlamydia trachomatis	1	0	0	0	0	0	0	0	0
NC_008576.1	156889	Magnetococcus marinus MC-1	2	2	0	0	0	2	0	0	0
NC_012466.1	488222	Streptococcus pneumoniae JJA	1	1	0	0	0	1	0	0	0
NZ_CP012366.1	53345	Enterococcus durans	7	7	0	0	0	7	0	0	0
NC_020930.1	1071772	Chlamydia trachomatis L2/25667R	0	0	0	0	0	0	0	0	0
NC_006831.1	302409	Ehrlichia ruminantium str. Gardel	0	0	0	0	0	0	0	0	0
NC_009727.1	434922	Coxiella burnetii Dugway 5J108-111	0	0	0	0	0	0	0	0	0
NC_011595.1	557600	Acinetobacter baumannii AB307-0294	6	5	0	0	0	5	0	0	0
NZ_CP007535.2	470	Acinetobacter baumannii	2	2	0	0	0	2	0	0	0
NC_017305.1	935298	Corynebacterium pseudotuberculosis PAT10	0	0	0	0	0	0	0	0	0
NC_013364.1	585396	Escherichia coli O111:H- str. 11128	3	0	0	0	0	0	0	0	0
NC_018691.1	930169	Alcanivorax dieselolei B5	3	2	0	0	0	2	0	0	0
NZ_CP012165.1	550	Enterobacter cloacae	1	1	0	0	0	1	0	0	0
NZ_CP012072.1	52773	Actinomyces meyeri	4	4	0	0	0	4	0	0	0
NC_009654.1	400668	Marinomonas sp. MWYL1	4	4	0	0	0	4	0	0	0
NZ_CP009037.1	611301	Xanthomonas citri subsp. citri	3	3	0	0	0	0	0	0	0
NC_017265.1	547048	Yersinia pestis biovar Medievalis str. Harbin 35	6	4	0	0	0	1	0	0	0
NC_013216.1	485916	Desulfotomaculum acetoxidans DSM 771	6	4	0	0	0	4	0	0	0
NC_014759.1	643867	Marivirga tractuosa DSM 4126	1	1	0	0	0	1	0	0	0
NC_018496.1	662946	Mycoplasma genitalium M6282	0	0	0	0	0	0	0	0	0
NZ_CP010346.1	1639	Listeria monocytogenes	2	2	0	0	0	2	0	0	0
NC_015224.1	994476	Yersinia enterocolitica subsp. palearctica 105.5R(r)	2	2	0	0	0	2	0	0	0
NC_009664.2	266940	Kineococcus radiotolerans SRS30216 = ATCC BAA-149	0	0	0	0	0	0	0	0	0
NC_007794.1	279238	Novosphingobium aromaticivorans DSM 12444	3	3	0	0	0	3	0	0	0
NC_007955.1	259564	Methanococcoides burtonii DSM 6242	1	1	0	0	0	1	0	0	0
NC_018704.1	698758	Amphibacillus xylanus NBRC 15112	0	0	0	0	0	0	0	0	0
NC_009074.1	320373	Burkholderia pseudomallei 668	4	4	0	0	0	2	0	0	0
NC_012918.1	443144	Geobacter sp. M21	2	2	0	0	0	2	0	0	0
NC_013926.1	439481	Aciduliprofundum boonei T469	3	3	0	0	0	3	0	0	0
NC_006347.1	295405	Bacteroides fragilis YCH46	3	2	0	0	0	2	0	0	0
NC_010725.1	441620	Methylobacterium populi BJ001	4	3	0	0	0	3	0	0	0
NZ_AP014624.1	878220	Chryseobacterium sp. StRB126	6	6	0	0	0	6	0	0	0
NC_014538.1	573062	Thermoanaerobacter sp. X513	3	3	0	0	0	0	0	0	0
NC_014169.1	759350	Bifidobacterium longum subsp. longum JDM301	3	2	0	0	0	2	0	0	0
NZ_CP012253.1	28141	Cronobacter sakazakii	3	3	0	0	0	3	0	0	0
NC_000908.2	243273	Mycoplasma genitalium G37	0	0	0	0	0	0	0	0	0
NZ_CP011367.1	106634	Thioalkalivibrio versutus	1	0	0	0	0	0	0	0	0
NZ_CP007769.1	1500960	Campylobacter sp. RM16704	2	0	0	0	0	0	0	0	0
NC_017663.1	910348	Escherichia coli P12b	4	0	0	0	0	0	0	0	0
NZ_CP004887.1	1308980	Klebsiella oxytoca HKOPL1	2	1	0	1	0	1	0	1	0
NC_017527.1	1110509	Methanosaeta harundinacea 6Ac	6	6	0	0	0	6	0	0	0
NZ_LN831048.1	1280	Staphylococcus aureus	1	1	0	0	0	1	0	0	0
NC_014377.1	555079	Thermosediminibacter oceani DSM 16646	6	5	0	0	0	5	0	0	0
NZ_CP009318.1	572264	Bacillus cereus 03BB102	3	3	0	0	0	2	0	0	0
NC_017291.1	1112250	Chlamydia psittaci C19/98	0	0	0	0	0	0	0	0	0
NZ_AP012332.1	585528	Gardnerella vaginalis ATCC 14018 = JCM 11026	1	1	0	0	0	1	0	0	0
NC_019675.1	292564	Cyanobium gracile PCC 6307	1	1	0	0	0	1	0	0	0
NC_015425.1	929506	Clostridium botulinum BKT015925	3	2	0	0	0	2	0	0	0
NC_017355.1	637913	Helicobacter pylori v225d	1	1	0	0	0	1	0	0	0
NZ_CP007452.1	1286171	Eubacterium acidaminophilum DSM 3953	4	3	0	0	0	3	0	0	0
NZ_CP012507.1	71999	Kocuria palustris	1	0	0	0	0	0	0	0	0
NZ_CP006923.1	1420012	Klebsiella pneumoniae 30660/NJST258_1	7	4	0	0	0	4	0	0	0
NZ_CP009533.1	216142	Pseudomonas rhizosphaerae	2	2	0	0	0	2	0	0	0
NC_006833.1	292805	Wolbachia endosymbiont strain TRS of Brugia malayi	0	0	0	0	0	0	0	0	0
NC_019936.1	644801	Pseudomonas stutzeri RCH2	1	1	0	0	0	1	0	0	0
NZ_CP011306.1	40324	Stenotrophomonas maltophilia	3	3	0	0	0	3	0	0	0
NC_013968.1	309800	Haloferax volcanii DS2	3	3	0	0	0	3	0	0	0
NC_012004.1	218495	Streptococcus uberis 0140J	2	1	0	0	0	1	0	0	0
NZ_CP012589.1	1705617	Capnocytophaga sp. oral taxon 323	1	1	0	0	0	1	0	0	0
NC_020796.1	1288122	Edwardsiella piscicida C07-087	3	3	0	0	0	1	0	0	0
NZ_CP010899.1	273035	Spiroplasma kunkelii CR2-3x	0	0	0	0	0	0	0	0	0
NC_018420.1	134287	secondary endosymbiont of Heteropsylla cubana	0	0	0	0	0	0	0	0	0
NC_006510.1	235909	Geobacillus kaustophilus HTA426	3	3	0	0	0	2	0	0	0
NC_010102.1	1016998	Salmonella enterica subsp. enterica serovar Paratyphi B str. SPB7	0	0	0	0	0	0	0	0	0
NZ_CP012026.1	485	Neisseria gonorrhoeae	1	1	0	0	0	1	0	0	0
NZ_CP006745.1	1401328	Candidatus Endolissoclinum faulkneri L5	2	2	0	0	0	2	0	0	0
NC_003155.4	227882	Streptomyces avermitilis MA-4680 = NBRC 14893	7	7	0	0	0	7	0	0	0
NC_009515.1	420247	Methanobrevibacter smithii ATCC 35061	2	2	0	0	0	2	0	0	0
NZ_CP009576.1	202752	Listeria ivanovii subsp. londoniensis	2	2	0	0	0	2	0	0	0
NC_014218.1	644284	Arcanobacterium haemolyticum DSM 20595	1	1	0	0	0	1	0	0	0
NC_012623.1	419942	Sulfolobus islandicus Y.N.15.51	1	1	0	0	0	1	0	0	0
NZ_CP008810.1	1093099	Campylobacter fetus subsp. venerealis 97/608	2	2	0	0	0	2	0	0	0
NZ_CP007230.1	367190	Yersinia similis	2	2	0	0	0	2	0	0	0
NZ_CP007493.1	697581	Thermofilum carboxyditrophus 1505	3	3	0	0	0	2	0	0	0
NZ_AP013355.1	1391728	Helicobacter pylori 26695-1CH	3	3	0	0	0	3	0	0	0
NC_013172.1	446465	Brachybacterium faecium DSM 4810	3	3	0	0	0	3	0	0	0
NZ_CP009087.1	149539	Salmonella enterica subsp. enterica serovar Enteritidis	3	2	0	0	0	2	0	0	0
NC_009707.1	360109	Campylobacter jejuni subsp. doylei 269.97	0	0	0	0	0	0	0	0	0
NC_017218.1	866777	Bifidobacterium breve ACS-071-V-Sch8b	2	2	0	0	0	1	0	0	0
NZ_CP006955.1	1263831	Bibersteinia trehalosi USDA-ARS-USMARC-189	2	2	0	0	0	2	0	0	0
NC_008816.1	146891	Prochlorococcus marinus str. AS9601	2	2	0	0	0	2	0	0	0
NZ_CP011657.1	546	Citrobacter freundii	5	4	0	0	0	4	0	0	0
NC_009524.1	349106	Psychrobacter sp. PRwf-1	0	0	0	0	0	0	0	0	0
NC_015587.1	547145	Hydrogenobaculum sp. SHO	1	1	0	0	0	0	0	0	0
NC_017082.1	335659	Bradyrhizobium sp. S23321	4	3	0	0	0	2	0	0	0
NZ_CP007173.1	1453990	Bacillus subtilis HJ5	2	1	0	0	0	1	0	0	0
NZ_CP010377.1	550	Enterobacter cloacae	5	4	0	0	0	4	0	0	0
NC_009338.1	350054	Mycobacterium gilvum PYR-GCK	3	2	0	0	0	2	0	0	0
NC_022550.1	1316444	Blattabacterium sp. (Nauphoeta cinerea)	1	1	0	0	0	1	0	0	0
NC_016832.1	1132507	Salmonella enterica subsp. enterica serovar Typhi str. P-stx-12	1	1	0	0	0	1	0	0	0
NZ_CP011020.1	587753	Pseudomonas chlororaphis	2	2	0	0	0	2	0	0	0
NZ_CP006694.1	758847	Leptospira santarosai serovar Shermani str. LT 821	1	1	0	0	0	1	0	0	0
NC_014921.1	943945	Mycoplasma fermentans M64	2	2	0	0	0	2	0	0	0
NC_008709.1	357804	Psychromonas ingrahamii 37	1	1	0	0	0	1	0	0	0
NC_020830.1	313598	Polaribacter sp. MED152	3	3	0	0	0	3	0	0	0
NZ_CP009553.2	93220	Pandoraea pnomenusa	4	4	0	0	0	4	0	0	0
NC_015680.1	529709	Pyrococcus yayanosii CH1	0	0	0	0	0	0	0	0	0
NC_021236.1	980422	Strawberry lethal yellows phytoplasma (CPA) str. NZSb11	1	0	0	0	0	0	0	0	0
NZ_CP010444.1	83333	Escherichia coli K-12	3	2	0	0	0	2	0	0	0
NC_011565.1	511995	Candidatus Azobacteroides pseudotrichonymphae genomovar. CFP2	1	1	0	0	0	1	0	0	0
NZ_CP009268.1	1262449	Clostridium pasteurianum DSM 525 = ATCC 6013	6	6	0	0	0	6	0	0	0
NZ_CP011832.1	1629723	Geobacillus sp. 12AMOR1	1	1	0	0	0	1	0	0	0
NC_020207.1	1104325	Enterococcus faecium NRRL B-2354	3	3	0	0	0	3	0	0	0
NZ_AP014509.1	1408159	Thermotoga caldifontis AZM44c09	2	2	0	0	0	2	0	0	0
NZ_CP007456.1	1447716	Bifidobacterium kashiwanohense PV20-2	0	0	0	0	0	0	0	0	0
NZ_AP013356.1	1391727	Helicobacter pylori 26695-1CL	0	0	0	0	0	0	0	0	0
NC_014363.1	633147	Olsenella uli DSM 7084	0	0	0	0	0	0	0	0	0
NZ_CP011101.1	1628753	Bacillus sp. LM 4-2	0	0	0	0	0	0	0	0	0
NZ_CP003409.1	1157947	Thermotoga sp. Cell2	1	0	0	0	0	0	0	0	0
NZ_CP009530.1	1434106	Methanosarcina barkeri 227	1	1	0	0	0	1	0	0	0
NZ_CP011265.1	1637999	Verrucomicrobia bacterium IMCC26134	0	0	0	0	0	0	0	0	0
NZ_CP011443.1	520	Bordetella pertussis	3	3	0	0	0	1	0	0	0
NC_017154.1	637382	Yersinia pestis D106004	6	5	0	0	0	0	0	0	0
NC_007354.1	269484	Ehrlichia canis str. Jake	1	1	0	0	0	1	0	0	0
NC_002971.3	227377	Coxiella burnetii RSA 493	2	1	0	0	0	1	0	0	0
NC_014532.1	768066	Halomonas elongata DSM 2581	4	4	0	0	0	4	0	0	0
NZ_CP004870.1	1261129	Bacillus thuringiensis serovar kurstaki str. HD-1	6	4	0	0	0	1	0	0	0
NC_017358.1	765964	Helicobacter pylori Cuz20	3	2	0	0	0	2	0	0	0
NZ_CP013119.1	511	Alcaligenes faecalis	3	2	0	0	0	2	0	0	0
NZ_CP010543.1	1263757	Mycoplasma pneumoniae 54524	0	0	0	0	0	0	0	0	0
NZ_CP010103.1	119856	Francisella tularensis subsp. tularensis	1	1	0	0	0	1	0	0	0
NZ_CP009162.1	1439852	Burkholderia pseudomallei K42	3	3	0	0	0	0	0	0	0
NC_015385.1	869209	Treponema succinifaciens DSM 2489	1	1	0	0	0	1	0	0	0
NC_008536.1	234267	Candidatus Solibacter usitatus Ellin6076	5	5	0	0	0	5	0	0	0
NC_017100.1	634453	Acetobacter pasteurianus IFO 3283-03	0	0	0	0	0	0	0	0	0
NZ_CP006738.1	1392500	Klebsiella pneumoniae HK787	7	5	0	0	0	5	0	0	0
NC_020559.1	652616	Mycobacterium tuberculosis str. Erdman = ATCC 35801	5	5	0	0	0	0	0	0	0
NZ_CP008846.1	1392	Bacillus anthracis	1	1	0	0	0	0	0	0	0
NZ_CP010520.1	1491	Clostridium botulinum	1	1	0	0	0	1	0	0	0
NZ_CP011078.1	29486	Yersinia ruckeri	3	3	0	0	0	3	0	0	0
NZ_CP006821.1	1382921	Helicobacter pylori oki112	4	4	0	0	0	4	0	0	0
NZ_CP007410.1	930166	Pseudomonas brassicacearum	7	7	0	0	0	7	0	0	0
NC_013315.1	645462	Peptoclostridium difficile CD196	1	1	0	0	0	1	0	0	0
NC_014562.1	712898	Pantoea vagans C9-1	0	0	0	0	0	0	0	0	0
NC_017299.1	941968	Clostridium botulinum H04402 065	6	6	0	0	0	6	0	0	0
NC_003272.1	103690	Nostoc sp. PCC 7120	5	5	0	0	0	5	0	0	0
NZ_CP009616.1	36809	Mycobacterium abscessus	4	4	0	0	0	4	0	0	0
NC_021362.1	766760	Bacillus paralicheniformis ATCC 9945a	3	3	0	0	0	1	0	0	0
NC_007519.1	207559	Desulfovibrio alaskensis G20	0	0	0	0	0	0	0	0	0
NZ_CP010407.1	362257	Streptomyces vietnamensis	7	7	0	0	0	5	0	0	0
NZ_CP010440.1	83333	Escherichia coli K-12	4	1	0	0	0	1	0	0	0
NC_020561.1	745310	Sphingomonas sp. MM-1	3	3	0	0	0	3	0	0	0
NC_017038.1	1080228	Synechocystis sp. PCC 6803 substr. GT-I	4	3	0	0	0	3	0	0	0
NZ_LN554884.1	1288	Staphylococcus xylosus	3	3	0	0	0	3	0	0	0
NZ_CP010577.1	1441	Bacillus thuringiensis serovar morrisoni	3	3	0	0	0	1	0	0	0
NC_011027.1	517417	Chlorobaculum parvum NCIB 8327	2	2	0	0	0	2	0	0	0
NC_016622.1	862719	Azospirillum lipoferum 4B	6	6	0	0	0	6	0	0	0
NC_011059.1	290512	Prosthecochloris aestuarii DSM 271	5	5	0	0	0	5	0	0	0
NC_010175.1	324602	Chloroflexus aurantiacus J-10-fl	8	8	0	0	0	0	0	0	0
NC_021883.1	1366053	Mannheimia haemolytica USMARC_2286	2	2	0	0	0	2	0	0	0
NZ_CP009743.1	488447	Burkholderia contaminans	8	8	0	0	0	5	0	0	0
NC_011660.1	552536	Listeria monocytogenes HCC23	1	1	0	0	0	1	0	0	0
NZ_CP007653.1	666	Vibrio cholerae	2	2	0	0	0	2	0	0	0
NC_008542.1	331272	Burkholderia cenocepacia HI2424	3	3	0	0	0	3	0	0	0
NC_022040.1	1310161	Corynebacterium glutamicum MB001	2	2	0	0	0	1	0	0	0
NZ_CP009854.1	550	Enterobacter cloacae	4	4	0	0	0	4	0	0	0
NC_021824.1	1639	Listeria monocytogenes	1	0	0	0	0	0	0	0	0
NC_019791.1	1056495	Caldisphaera lagunensis DSM 15908	2	2	0	0	0	2	0	0	0
NZ_CP007684.1	1639	Listeria monocytogenes	4	4	0	0	0	4	0	0	0
NC_007622.1	273036	Staphylococcus aureus RF122	1	1	0	0	0	1	0	0	0
NC_009495.1	413999	Clostridium botulinum A str. ATCC 3502	3	2	0	0	0	2	0	0	0
NZ_CP010905.1	272563	Peptoclostridium difficile 630	4	3	0	0	0	3	0	0	0
NC_017619.1	1005041	Streptococcus suis SS12	0	0	0	0	0	0	0	0	0
NZ_CP007211.1	1454592	Salmonella enterica subsp. enterica serovar Anatum str. CDC 06-0532	4	3	0	0	0	3	0	0	0
NC_004432.1	272633	Mycoplasma penetrans HF-2	1	1	0	0	0	1	0	0	0
NC_020195.1	1072467	Blattabacterium sp. (Blatta orientalis) str. Tarazona	0	0	0	0	0	0	0	0	0
NC_019978.1	748449	Halobacteroides halobius DSM 5150	0	0	0	0	0	0	0	0	0
NC_015702.1	765952	Parachlamydia acanthamoebae UV-7	3	3	0	0	0	3	0	0	0
NC_013853.1	365659	Streptococcus mitis B6	1	1	0	0	0	1	0	0	0
NZ_CP008781.1	28450	Burkholderia pseudomallei	4	3	0	0	0	1	0	0	0
NC_019814.1	1208923	Candidatus Kinetoplastibacterium blastocrithidii (ex Strigomonas culicis)	0	0	0	0	0	0	0	0	0
NZ_CP010113.1	1770	Mycobacterium avium subsp. paratuberculosis	4	4	0	0	0	4	0	0	0
NC_015514.1	590998	Cellulomonas fimi ATCC 484	6	6	0	0	0	6	0	0	0
NZ_HG813242.1	1449752	Staphylococcus epidermidis PM221	1	1	0	0	0	1	0	0	0
NC_019427.1	46234	Anabaena sp. 90	3	3	0	0	0	3	0	0	0
NC_022795.1	1123384	Pseudothermotoga hypogea DSM 11164 = NBRC 106472	0	0	0	0	0	0	0	0	0
NC_014932.1	696125	Bartonella clarridgeiae 73	1	1	0	0	0	1	0	0	0
NZ_CP007444.1	1379159	Dyella jiangningensis	1	1	0	0	0	1	0	0	0
NC_004842.2	234826	Anaplasma marginale str. St. Maries	2	2	0	0	0	2	0	0	0
NC_005966.1	62977	Acinetobacter sp. ADP1	1	1	0	0	0	1	0	0	0
NC_016901.1	693973	Shewanella baltica OS678	2	2	0	0	0	2	0	0	0
NC_018408.1	1159199	Mycoplasma gallisepticum NC96_1596-4-2P	0	0	0	0	0	0	0	0	0
NZ_CP011477.1	1620392	Spongiibacter sp. IMCC21906	0	0	0	0	0	0	0	0	0
NC_011229.1	412419	Borrelia duttonii Ly	2	2	0	0	0	1	0	0	0
NZ_CP012622.1	362837	Spiroplasma cantharicola	0	0	0	0	0	0	0	0	0
NZ_FO538765.1	1288970	Magnetospira sp. QH-2	0	0	0	0	0	0	0	0	0
NC_019702.1	1173263	Synechococcus sp. PCC 7502	2	1	0	0	0	1	0	0	0
NZ_CP009544.1	1392	Bacillus anthracis	2	2	0	0	0	0	0	1	0
NC_017345.1	548473	Staphylococcus aureus subsp. aureus TCH60	3	2	0	0	0	2	0	0	0
NZ_CP007499.1	1280	Staphylococcus aureus	1	1	0	0	0	1	0	0	0
NC_011740.1	585054	Escherichia fergusonii ATCC 35469	3	2	0	0	0	2	0	0	0
NZ_CP011077.1	1134687	Klebsiella michiganensis	1	1	0	0	0	1	0	0	0
NZ_CP007053.1	794903	Opitutaceae bacterium TAV5	0	0	0	0	0	0	0	0	0
NC_014655.1	649349	Leadbetterella byssophila DSM 17132	2	2	0	0	0	2	0	0	0
NZ_CP009110.1	1068978	Amycolatopsis methanolica 239	2	2	0	0	0	2	0	0	0
NC_003923.1	196620	Staphylococcus aureus subsp. aureus MW2	3	3	0	0	0	3	0	0	0
NZ_CP007421.1	1412463	Salmonella enterica subsp. enterica serovar Enteritidis str. EC20090884	2	2	0	0	0	2	0	0	0
NC_009033.1	399550	Staphylothermus marinus F1	4	4	0	0	0	4	0	0	0
NZ_LM995445.1	40480	Mycoplasma capricolum subsp. capripneumoniae	0	0	0	0	0	0	0	0	0
NC_016826.1	1069533	Streptococcus infantarius subsp. infantarius CJ18	0	0	0	0	0	0	0	0	0
NC_016043.1	1008459	Taylorella asinigenitalis MCE3	0	0	0	0	0	0	0	0	0
NC_017347.1	1006543	Staphylococcus aureus subsp. aureus T0131	3	3	0	0	0	3	0	0	0
NZ_LN680001.1	1409	Bacillus sp.	2	2	0	0	0	0	0	0	0
NC_017635.1	566546	Escherichia coli W	2	0	0	0	0	0	0	0	0
NZ_CP008878.1	96345	Flavobacterium psychrophilum	0	0	0	0	0	0	0	0	0
NZ_CP011965.1	1679	Bifidobacterium longum subsp. longum	1	1	0	0	0	1	0	0	0
NC_007434.1	320372	Burkholderia pseudomallei 1710b	2	2	0	0	0	0	0	0	0
NZ_CP009013.1	611301	Xanthomonas citri subsp. citri	4	4	0	0	0	0	0	0	0
NZ_CP010058.1	32022	Campylobacter jejuni subsp. jejuni	0	0	0	0	0	0	0	0	0
NZ_CP006933.1	2162	Methanobacterium formicicum	0	0	0	0	0	0	0	0	0
NC_009613.3	402612	Flavobacterium psychrophilum JIP02/86	1	1	0	0	0	1	0	0	0
NZ_LN829118.1	1608628	Candidatus Filomicrobium marinum	2	2	0	0	0	2	0	0	0
NC_007296.1	319701	Streptococcus pyogenes MGAS6180	1	1	0	0	0	1	0	0	0
NC_002939.5	243231	Geobacter sulfurreducens PCA	2	2	0	0	0	2	0	0	0
NZ_CP011412.1	1543721	Sedimenticola sp. SIP-G1	4	4	0	0	0	4	0	0	0
NC_017449.1	676032	Francisella cf. tularensis subsp. novicida 3523	0	0	0	0	0	0	0	0	0
NC_016816.1	1123863	Pantoea ananatis LMG 5342	5	5	0	0	0	5	0	0	0
NZ_CP009796.1	1423	Bacillus subtilis	4	4	0	0	0	0	0	0	0
NC_017445.1	215689	Erwinia sp. Ejp617	1	1	0	0	0	1	0	0	0
NC_011741.1	585034	Escherichia coli IAI1	2	0	0	0	0	0	0	0	0
NC_021191.1	649831	Actinoplanes sp. N902-109	9	7	0	0	0	7	0	0	0
NC_015222.1	153948	Nitrosomonas sp. AL212	1	1	0	0	0	1	0	0	0
NZ_CP011321.1	562	Escherichia coli	4	2	0	0	0	2	0	0	0
NZ_CP007475.1	1249652	Ehrlichia chaffeensis str. Jax	2	1	0	0	0	1	0	0	0
NZ_CP010439.1	83333	Escherichia coli K-12	4	1	0	0	0	1	0	0	0
NC_008541.1	290399	Arthrobacter sp. FB24	3	3	0	0	0	3	0	0	0
NC_013174.1	471856	Jonesia denitrificans DSM 20603	4	4	0	0	0	4	0	0	0
NC_010658.1	344609	Shigella boydii CDC 3083-94	3	0	0	0	0	0	0	0	0
NZ_CP012044.1	1132508	Mycobacterium abscessus UC22	2	2	0	0	0	2	0	0	0
NZ_CP010849.1	477245	Streptomyces cyaneogriseus subsp. noncyanogenus	1	1	0	0	0	1	0	0	0
NZ_CP013202.1	1311	Streptococcus agalactiae	4	4	0	0	0	4	0	0	0
NC_021848.1	1338032	Vibrio parahaemolyticus O1:K33 str. CDC_K4557	2	2	0	0	0	2	0	0	0
NZ_HG916765.1	1437824	Castellaniella defragrans 65Phen	5	4	0	0	0	4	0	0	0
NZ_CP006777.1	864803	Clostridium beijerinckii ATCC 35702	6	6	0	0	0	4	0	0	0
NC_007880.1	376619	Francisella tularensis subsp. holarctica LVS	1	1	0	0	0	1	0	0	0
NZ_CP011329.1	1311	Streptococcus agalactiae	0	0	0	0	0	0	0	0	0
NZ_HG813240.1	1427516	Mycobacterium tuberculosis 49-02	2	2	0	0	0	0	0	0	0
NZ_CP010569.1	813	Chlamydia trachomatis	0	0	0	0	0	0	0	0	0
NC_022759.1	1244528	Campylobacter fetus subsp. testudinum 03-427	0	0	0	0	0	0	0	0	0
NZ_CP007533.1	1194154	Salmonella enterica subsp. enterica serovar Bredeney str. CFSAN001080	2	2	0	0	0	2	0	0	0
NZ_CP008874.1	1604004	Halanaeroarchaeum sulfurireducens	2	1	0	0	0	1	0	0	0
NC_010498.1	439855	Escherichia coli SMS-3-5	0	0	0	0	0	0	0	0	0
NC_016024.1	981222	Chloracidobacterium thermophilum B	8	6	0	0	0	6	0	0	0
NZ_CP012076.1	103855	Bordetella hinzii	2	2	0	0	0	2	0	0	0
NC_008278.1	326424	Frankia alni ACN14a	1	1	0	0	0	1	0	0	0
NZ_CP012690.1	32022	Campylobacter jejuni subsp. jejuni	0	0	0	0	0	0	0	0	0
NC_003869.1	273068	Caldanaerobacter subterraneus subsp. tengcongensis MB4	0	0	0	0	0	0	0	0	0
NC_009848.1	315750	Bacillus pumilus SAFR-032	3	3	0	0	0	3	0	0	0
NZ_CP012192.1	1678678	Burkholderia sp. HB1	5	5	0	0	0	4	0	0	0
NC_020815.1	1137651	Xanthomonas citri subsp. citri Aw12879	3	3	0	0	0	0	0	0	0
NC_015697.1	491077	Lactobacillus reuteri SD2112	1	1	0	0	0	1	0	0	0
NZ_CP006890.1	1423138	Bacillus methylotrophicus SQR9	6	6	0	0	0	1	0	0	0
NZ_CP006580.1	1354030	Enterobacter cloacae P101	2	1	0	0	0	1	0	0	0
NC_022117.1	813	Chlamydia trachomatis	1	1	0	0	0	1	0	0	0
NZ_CP010892.1	1611770	Pseudomonas sp. MRSN12121	3	2	0	0	0	1	0	0	0
NC_018641.1	1215914	Lactobacillus casei W56	5	5	0	0	0	1	0	0	0
NC_012622.1	439386	Sulfolobus islandicus Y.G.57.14	3	3	0	0	0	2	0	0	0
NZ_HG326223.1	273526	Serratia marcescens subsp. marcescens Db11	3	3	0	0	0	1	0	0	0
NC_011586.1	480119	Acinetobacter baumannii AB0057	4	3	0	0	0	3	0	0	0
NZ_CP010811.1	666	Vibrio cholerae	0	0	0	0	0	0	0	0	0
NC_007484.1	323261	Nitrosococcus oceani ATCC 19707	3	2	0	0	0	2	0	0	0
NC_016788.1	698970	Corynebacterium diphtheriae HC04	0	0	0	0	0	0	0	0	0
NZ_AP013072.1	1353243	Streptococcus anginosus subsp. whileyi MAS624	2	2	0	0	0	2	0	0	0
NZ_CP009279.1	1536775	Paenibacillus sp. FSL H7-0737	6	6	0	0	0	6	0	0	0
NC_014329.1	765874	Corynebacterium pseudotuberculosis FRC41	3	3	0	0	0	3	0	0	0
NZ_CP012608.1	1646498	Acinetobacter sp. TTH0-4	2	2	0	0	0	2	0	0	0
NC_014008.1	583355	Coraliomargarita akajimensis DSM 45221	2	2	0	0	0	2	0	0	0
NC_015690.1	1036673	Paenibacillus mucilaginosus KNP414	6	6	0	0	0	6	0	0	0
NC_017515.1	935593	Neisseria meningitidis M04-240196	2	2	0	0	0	2	0	0	0
NZ_CP008776.1	1314	Streptococcus pyogenes	3	3	0	0	0	2	0	0	0
NZ_CP007722.1	1718	Corynebacterium glutamicum	0	0	0	0	0	0	0	0	0
NC_018497.1	662945	Mycoplasma genitalium M6320	0	0	0	0	0	0	0	0	0
NC_015634.1	941639	Bacillus coagulans 2-6	4	4	0	0	0	3	0	0	0
NC_021354.1	1313290	Erysipelothrix rhusiopathiae SY1027	1	1	0	0	0	1	0	0	0
NZ_CP007686.1	1639	Listeria monocytogenes	1	1	0	0	0	1	0	0	0
NZ_CP012897.1	1532555	Brevundimonas sp. DS20	2	2	0	0	0	2	0	0	0
NZ_LN890520.1	57743	Salmonella enterica subsp. enterica serovar Weltevreden	6	6	0	0	0	6	0	0	0
NC_017187.1	944546	Arcobacter butzleri ED-1	0	0	0	0	0	0	0	0	0
NC_009718.1	381764	Fervidobacterium nodosum Rt17-B1	2	1	0	0	0	1	0	0	0
NC_006448.1	264199	Streptococcus thermophilus LMG 18311	1	1	0	0	0	1	0	0	0
NZ_CP006809.1	1403312	Lactobacillus gasseri 130918	2	2	0	0	0	2	0	0	0
NC_009439.1	399739	Pseudomonas mendocina ymp	5	5	0	0	0	4	0	0	0
NC_018693.1	1195464	Bacillus thuringiensis MC28	2	1	0	0	0	1	0	0	0
NZ_CP012174.1	43687	Metallosphaera sedula	2	2	0	0	0	2	0	0	0
NC_022364.1	1335916	Escherichia coli LY180	3	0	0	0	0	0	0	0	0
NC_018650.1	1134782	Escherichia coli O104:H4 str. 2009EL-2050	2	1	0	0	0	1	0	0	0
NC_017545.1	393130	Listeria monocytogenes J0161	2	2	0	0	0	2	0	0	0
NC_018706.1	1100841	Acinetobacter baumannii TYTH-1	2	2	0	0	0	2	0	0	0
NC_013510.1	471852	Thermomonospora curvata DSM 43183	4	4	0	0	0	4	0	0	0
NC_022648.1	1355100	Escherichia coli JJ1886	1	0	0	0	0	0	0	0	0
NC_022236.1	696216	Streptococcus constellatus subsp. pharyngis C232	0	0	0	0	0	0	0	0	0
NC_015958.1	697303	Thermoanaerobacter wiegelii Rt8.B1	1	1	0	0	0	1	0	0	0
NC_022660.1	1358410	Campylobacter coli 15-537360	0	0	0	0	0	0	0	0	0
NC_014729.1	469382	Halogeometricum borinquense DSM 11551	6	6	0	0	0	6	0	0	0
NZ_CP011624.1	573	Klebsiella pneumoniae	3	3	0	0	0	3	0	0	0
NZ_CP009789.1	83333	Escherichia coli K-12	1	0	0	0	0	0	0	0	0
NC_020211.1	435998	Serratia marcescens WW4	2	2	0	0	0	1	0	0	0
NZ_CP009215.1	401472	Corynebacterium ureicelerivorans	2	1	0	0	0	1	0	0	0
NZ_CP007512.1	1330043	Bacillus bombysepticus str. Wang	3	3	0	0	0	1	0	0	0
NC_018524.1	1205910	Nocardiopsis alba ATCC BAA-2165	6	6	0	0	0	6	0	0	0
NZ_CP007697.1	645170	Brucella suis bv. 2	1	1	0	0	0	0	0	0	0
NC_009004.1	416870	Lactococcus lactis subsp. cremoris MG1363	2	2	0	0	0	2	0	0	0
NZ_CP007210.1	1457188	Listeria monocytogenes WSLC1042	2	1	0	0	0	1	0	0	0
NC_018678.1	1004788	Alteromonas macleodii str. 'English Channel 673'	3	3	0	0	0	3	0	0	0
NC_017058.1	1105110	Rickettsia australis str. Cutlack	1	1	0	0	0	1	0	0	0
NZ_CP011787.1	186490	Candidatus Baumannia cicadellinicola	0	0	0	0	0	0	0	0	0
NC_020526.1	1246365	Streptococcus suis SC070731	1	1	0	0	0	1	0	0	0
NC_017554.1	1095774	Pantoea ananatis PA13	5	5	0	0	0	5	0	0	0
NZ_CP011130.1	435897	Lysobacter capsici	4	4	0	0	0	4	0	0	0
NZ_CP007154.1	743966	Mycoplasma bovoculi M165/69	1	1	0	0	0	1	0	0	0
NC_022221.1	1225522	Salmonella enterica subsp. enterica serovar Gallinarum/pullorum str. CDC1983-67	3	3	0	0	0	3	0	0	0
NC_003485.1	186103	Streptococcus pyogenes MGAS8232	2	2	0	0	0	1	0	0	0
NZ_AP013357.1	1401639	Acinetobacter baumannii NCGM 237	3	2	0	0	0	2	0	0	0
NC_010003.1	403833	Petrotoga mobilis SJ95	3	3	0	0	0	3	0	0	0
NZ_CP012150.1	134601	Mycobacterium goodii	6	6	0	0	0	6	0	0	0
NZ_CP010048.1	1505596	Blochmannia endosymbiont of Polyrhachis (Hedomyrma) turneri	0	0	0	0	0	0	0	0	0
NC_013768.1	637381	Listeria monocytogenes 08-5923	5	4	0	0	0	4	0	0	0
NZ_CP009440.1	28110	Francisella philomiragia	1	1	0	0	0	1	0	0	0
NC_016829.1	1129369	Mycoplasma hyorhinis GDL-1	3	3	0	0	0	3	0	0	0
NZ_CP011366.1	407035	Salinicoccus halodurans	3	3	0	0	0	3	0	0	0
NC_015431.1	862259	Mycoplasma mycoides subsp. capri LC str. 95010	1	1	0	0	0	1	0	0	0
NZ_CP012259.1	1159491	Cronobacter malonaticus LMG 23826	3	3	0	0	0	0	0	0	0
NC_008025.1	319795	Deinococcus geothermalis DSM 11300	4	4	0	0	0	4	0	0	0
NC_009481.1	32051	Synechococcus sp. WH 7803	0	0	0	0	0	0	0	0	0
NZ_CP009226.1	1507806	Campylobacter fetus subsp. testudinum	0	0	0	0	0	0	0	0	0
NZ_CP008730.1	87883	Burkholderia multivorans	8	8	0	0	0	7	0	0	0
NZ_CP012371.1	1266925	Nitrosospira briensis C-128	4	3	0	0	0	3	0	0	0
NZ_AASL01000001.1	354242	Campylobacter jejuni subsp. jejuni 81-176	0	0	0	0	0	0	0	0	0
NC_016629.1	690850	Desulfovibrio africanus str. Walvis Bay	3	3	0	0	0	3	0	0	0
NC_017243.1	1045858	Brachyspira intermedia PWS/A	1	0	0	0	0	0	0	0	0
NZ_CP011568.1	445709	Pandoraea thiooxydans	4	4	0	0	0	4	0	0	0
NZ_CP011975.1	263819	Yersinia aleksiciae	1	1	0	0	0	1	0	0	0
NC_003228.3	272559	Bacteroides fragilis NCTC 9343	5	5	0	0	0	5	0	0	0
NC_010544.1	59748	Candidatus Phytoplasma australiense	2	1	0	0	0	1	0	0	0
NC_022663.1	557599	Mycobacterium kansasii ATCC 12478	3	3	0	0	0	3	0	0	0
NC_021833.1	1276221	Spiroplasma diminutum CUAS-1	0	0	0	0	0	0	0	0	0
NZ_CP009208.1	72407	Klebsiella pneumoniae subsp. pneumoniae	3	3	0	0	0	3	0	0	0
NC_010263.3	452659	Rickettsia rickettsii str. Iowa	1	0	0	0	0	0	0	0	0
NZ_CP012679.1	287	Pseudomonas aeruginosa	6	6	0	0	0	6	0	0	0
NZ_CP007235.1	1454639	Salmonella enterica subsp. enterica serovar Typhimurium str. USDA-ARS-USMARC-1899	4	4	0	0	0	4	0	0	0
NZ_CP007790.1	1224162	Corynebacterium marinum DSM 44953	1	1	0	0	0	1	0	0	0
NZ_CP009481.1	1299326	Mycobacterium kansasii 662	5	5	0	0	0	4	0	0	0
NC_012850.1	395491	Rhizobium leguminosarum bv. trifolii WSM1325	6	6	0	0	0	6	0	0	0
NC_021740.1	1306414	Mycobacterium tuberculosis EAI5	5	5	0	0	0	0	0	0	0
NC_018712.1	617121	Streptococcus dysgalactiae subsp. equisimilis RE378	1	1	0	0	0	0	0	0	0
NC_000964.3	224308	Bacillus subtilis subsp. subtilis str. 168	3	3	0	0	0	0	0	0	0
NZ_CP007322.1	1412461	Salmonella enterica subsp. enterica serovar Enteritidis str. EC20090332	2	2	0	0	0	2	0	0	0
NC_022576.1	946483	Candidatus Symbiobacter mobilis CR	0	0	0	0	0	0	0	0	0
NZ_CP009058.1	411555	Borrelia afzelii K78	0	0	0	0	0	0	0	0	0
NZ_CP007755.1	28025	Bifidobacterium animalis	0	0	0	0	0	0	0	0	0
NC_018513.1	1009846	Burkholderia cepacia GG4	4	4	0	0	0	3	0	1	0
NZ_CP007674.1	1280	Staphylococcus aureus	2	2	0	0	0	2	0	0	0
NC_022111.1	575614	Prevotella sp. oral taxon 299 str. F0039	1	1	0	0	0	1	0	0	0
NZ_CP012830.1	294	Pseudomonas fluorescens	4	4	0	0	0	4	0	0	0
NC_018592.1	882096	Listeria monocytogenes SLCC5850	0	0	0	0	0	0	0	0	0
NC_017359.1	794851	Helicobacter pylori Sat464	1	1	0	0	0	1	0	0	0
NC_017579.1	693970	Shewanella baltica OS117	7	7	0	0	0	6	0	0	0
NC_019393.1	1004786	Alteromonas macleodii AltDE1	1	1	0	0	0	1	0	0	0
NC_016148.1	580340	Thermovirga lienii DSM 17291	3	2	0	0	0	2	0	0	0
NZ_CP009282.1	1536771	Paenibacillus sp. FSL R5-0912	3	3	0	0	0	3	0	0	0
NC_022438.1	1389489	Leifsonia xyli subsp. cynodontis DSM 46306	3	2	0	0	0	2	0	0	0
NZ_CP012362.1	1698446	Pseudomonadaceae bacterium D3318	0	0	0	0	0	0	0	0	0
NZ_CP009241.1	1536774	Paenibacillus sp. FSL H7-0357	8	7	0	0	0	7	0	0	0
NZ_AP014584.1	38504	Ureaplasma parvum serovar 3	1	1	0	0	0	1	0	0	0
NC_022369.1	1295826	Lactococcus lactis subsp. cremoris KW2	2	2	0	0	0	2	0	0	0
NZ_CP010267.1	2103	Mycoplasma mycoides subsp. mycoides	1	1	0	0	0	1	0	0	0
NZ_CP009677.1	2098	Mycoplasma hominis	0	0	0	0	0	0	0	0	0
NZ_CP011414.1	1150773	Streptococcus pyogenes JRS4	0	0	0	0	0	0	0	0	0
NC_007759.1	56780	Syntrophus aciditrophicus SB	2	2	0	0	0	2	0	0	0
NC_012559.1	557598	Laribacter hongkongensis HLHK9	1	1	0	0	0	1	0	0	0
NZ_CP012945.1	1736675	Devosia sp. A16	4	4	0	0	0	4	0	0	0
NZ_CP007567.1	1208104	Aeromonas media WS	2	2	0	0	0	2	0	0	0
NC_010611.1	405416	Acinetobacter baumannii ACICU	2	2	0	0	0	2	0	0	0
NC_015731.1	261292	Nitrosomonas sp. Is79A3	3	3	0	0	0	3	0	0	0
NZ_CP012127.1	562	Escherichia coli	5	1	0	0	0	0	0	0	0
NC_017953.1	1071763	Chlamydia trachomatis F/SW5	0	0	0	0	0	0	0	0	0
NC_008380.1	216596	Rhizobium leguminosarum bv. viciae 3841	3	3	0	0	0	3	0	0	0
NC_017933.1	1138308	Cronobacter sakazakii ES15	4	4	0	0	0	2	0	0	0
NZ_CP011057.1	2287	Sulfolobus solfataricus	3	3	0	0	0	3	0	0	0
NZ_CP012689.1	32022	Campylobacter jejuni subsp. jejuni	0	0	0	0	0	0	0	0	0
NC_021661.1	571800	Psychrobacter sp. G	0	0	0	0	0	0	0	0	0
NC_022991.1	1406860	Salmonella enterica subsp. enterica serovar Agona str. 24249	3	3	0	0	0	3	0	0	0
NZ_CP010431.1	93222	Pandoraea sputorum	2	2	0	0	0	2	0	0	0
NC_021499.1	1245471	Pseudomonas resinovorans NBRC 106553	1	1	0	0	0	0	0	0	0
NZ_AP014582.1	518	Bordetella bronchiseptica	4	4	0	0	0	2	0	0	0
NC_013504.1	633699	Lactobacillus johnsonii FI9785	2	2	0	0	0	2	0	0	0
NZ_CP008924.1	1719	Corynebacterium pseudotuberculosis	0	0	0	0	0	0	0	0	0
NC_017196.2	645657	Bacillus subtilis subsp. natto BEST195	2	2	0	0	0	0	0	0	0
NZ_CP009454.1	1076550	Pantoea rwandensis	6	6	0	0	0	6	0	0	0
NC_015759.1	1045854	Weissella koreensis KACC 15510	1	1	0	0	0	1	0	0	0
NC_017295.1	863638	Clostridium acetobutylicum EA 2018	3	3	0	0	0	3	0	0	0
NZ_CP009574.1	1547445	Francisella sp. FSC1006	0	0	0	0	0	0	0	0	0
NC_019904.1	926556	Echinicola vietnamensis DSM 17526	2	2	0	0	0	2	0	0	0
NZ_CP009535.1	441156	Burkholderia pseudomallei 7894	6	6	0	0	0	2	0	1	0
NC_003198.1	220341	Salmonella enterica subsp. enterica serovar Typhi str. CT18	1	0	0	0	0	0	0	0	0
NZ_LN515398.1	40480	Mycoplasma capricolum subsp. capripneumoniae	1	1	0	0	0	1	0	0	0
NZ_CP006905.1	1415775	Clostridium baratii str. Sullivan	3	3	0	0	0	3	0	0	0
NZ_CP012576.1	28450	Burkholderia pseudomallei	3	3	0	0	0	0	0	0	0
NZ_HG938355.1	1028801	Neorhizobium galegae bv. officinalis bv. officinalis str. HAMBI 1141	4	4	0	0	0	4	0	0	0
NZ_CP008887.1	1505907	Thermococcus eurythermalis	1	1	0	0	0	1	0	0	0
NC_017022.1	1155766	Enterococcus faecium Aus0004	2	2	0	0	0	2	0	0	0
NZ_CP012746.1	1323664	Burkholderia caribensis MBA4	8	8	0	0	0	7	0	0	0
NC_017221.1	1035817	Bifidobacterium longum subsp. longum KACC 91563	4	3	0	0	0	2	0	0	0
NZ_CP010072.1	32022	Campylobacter jejuni subsp. jejuni	0	0	0	0	0	0	0	0	0
NC_017079.1	926550	Caldilinea aerophila DSM 14535 = NBRC 104270	4	4	0	0	0	4	0	0	0
NC_020126.1	1278073	Myxococcus stipitatus DSM 14675	4	3	0	0	0	3	0	0	0
NC_004342.2	189518	Leptospira interrogans serovar Lai str. 56601	1	1	0	0	0	1	0	0	0
NC_007614.1	323848	Nitrosospira multiformis ATCC 25196	1	1	0	0	0	1	0	0	0
NZ_CP009312.1	1528099	Corynebacteriales bacterium X1036	0	0	0	0	0	0	0	0	0
NC_009381.1	386656	Yersinia pestis Pestoides F	5	5	0	0	0	1	0	0	0
NC_015738.1	502558	Eggerthella sp. YY7918	4	4	0	0	0	4	0	0	0
NC_016854.1	568708	Salmonella enterica subsp. enterica serovar Typhimurium str. D23580	3	3	0	0	0	3	0	0	0
NZ_CP006999.1	1273266	Campylobacter fetus subsp. venerealis cfvi03/293	2	2	0	0	0	2	0	0	0
NZ_LM651928.1	623	Shigella flexneri	2	0	0	0	0	0	0	0	0
NZ_CP009577.1	202751	Listeria ivanovii subsp. ivanovii	2	2	0	0	0	2	0	0	0
NC_014640.1	762376	Achromobacter xylosoxidans A8	1	1	0	0	0	1	0	0	0
NZ_CP009045.1	302911	Bifidobacterium animalis subsp. lactis	0	0	0	0	0	0	0	0	0
NC_022349.1	1219076	Vibrio alginolyticus NBRC 15630 = ATCC 17749	6	6	0	0	0	5	0	0	0
NC_021003.1	869311	Streptococcus pneumoniae SPN032672	2	2	0	0	0	1	0	0	0
NC_009513.1	557436	Lactobacillus reuteri DSM 20016	2	2	0	0	0	2	0	0	0
NZ_CP011441.1	520	Bordetella pertussis	3	3	0	0	0	0	0	0	0
NZ_CP007287.1	1687	Bifidobacterium coryneforme	3	2	0	0	0	2	0	0	0
NZ_CP007774.1	580033	Campylobacter volucris LMG 24379	0	0	0	0	0	0	0	0	0
NC_009135.1	402880	Methanococcus maripaludis C5	2	2	0	0	0	2	0	0	0
NC_018515.1	768704	Desulfosporosinus meridiei DSM 13257	4	4	0	0	0	4	0	0	0
NZ_CP007539.1	1280	Staphylococcus aureus	2	2	0	0	0	2	0	0	0
NZ_CP006751.1	1345707	Yersinia pestis 3770	7	7	0	0	0	1	0	0	0
NZ_CP004001.1	1249468	Burkholderia pseudomallei NCTC 13178	4	4	0	0	0	1	0	1	0
NC_008146.1	164756	Mycobacterium sp. MCS	5	5	0	0	0	0	0	0	0
NZ_CP010279.1	796730	Salmonella enterica subsp. enterica serovar Newport str. CVM 22425	1	1	0	0	0	1	0	0	0
NZ_CP009981.1	1392	Bacillus anthracis	3	3	0	0	0	1	0	0	0
NZ_CP007758.1	36855	Brucella canis	1	1	0	0	0	0	0	0	0
NC_014833.1	697329	Ruminococcus albus 7 = DSM 20455	3	3	0	0	0	3	0	0	0
NC_018646.1	1203670	Streptococcus agalactiae GD201008-001	0	0	0	0	0	0	0	0	0
NZ_CP011232.1	1330330	Kosmotoga pacifica	0	0	0	0	0	0	0	0	0
NC_014920.1	866630	Haemophilus influenzae F3031	1	1	0	0	0	1	0	0	0
NC_018828.1	1208660	Bordetella parapertussis Bpp5	3	2	0	0	0	0	0	0	0
NZ_CP007034.1	880074	Barnesiella viscericola DSM 18177	2	2	0	0	0	2	0	0	0
NZ_CP006649.1	1354240	Riemerella anatipestifer CH3	1	1	0	0	0	1	0	0	0
NZ_CP011448.1	520	Bordetella pertussis	4	3	0	0	0	2	0	0	0
NZ_CP009482.1	1299329	Mycobacterium avium subsp. avium 2285 (S)	2	2	0	0	0	2	0	0	0
NZ_CP009785.1	632	Yersinia pestis	2	1	0	0	0	0	0	1	0
NZ_AP012496.1	1204342	Bacillus subtilis BEST7003	2	2	0	0	0	0	0	0	0
NC_015977.1	585394	Roseburia hominis A2-183	1	1	0	0	0	1	0	0	0
NZ_CP007693.1	645170	Brucella suis bv. 2	1	1	0	0	0	0	0	0	0
NC_010508.1	406425	Burkholderia cenocepacia MC0-3	4	4	0	0	0	4	0	0	0
NC_007712.1	343509	Sodalis glossinidius str. 'morsitans'	2	2	0	0	0	2	0	0	0
NZ_CP009046.1	1282	Staphylococcus epidermidis	0	0	0	0	0	0	0	0	0
NC_015520.1	697281	Mahella australiensis 50-1 BON	3	3	0	0	0	3	0	0	0
NZ_CP008992.1	1308548	Xanthomonas citri subsp. citri UI6	4	2	0	0	0	0	0	1	0
NC_017316.1	474186	Enterococcus faecalis OG1RF	4	4	0	0	0	4	0	0	0
NC_018721.1	313595	Psychroflexus torquis ATCC 700755	5	4	0	0	0	4	0	0	0
NZ_CP007004.1	1429044	Vibrio parahaemolyticus UCM-V493	5	5	0	0	0	5	0	0	0
NZ_CP012195.1	1032069	Campylobacter ureolyticus RIGS 9880	1	1	0	0	0	1	0	0	0
NC_017354.1	684950	Helicobacter pylori 52	1	1	0	0	0	1	0	0	0
NZ_AP011952.1	866790	Methanothermobacter sp. CaT2	1	1	0	0	0	0	0	0	0
NC_022115.1	1136179	Rhodococcus erythropolis CCM2595	6	6	0	0	0	6	0	0	0
NC_020940.1	1071767	Chlamydia trachomatis Ia/SotonIa3	1	1	0	0	0	1	0	0	0
NC_023019.1	1415629	Pseudomonas aeruginosa MTB-1	2	2	0	0	0	1	0	0	0
NC_016912.1	1028799	Staphylococcus aureus subsp. aureus VC40	1	1	0	0	0	1	0	0	0
NZ_CP003181.1	1052004	Granulibacter bethesdensis CGDNIH3	2	2	0	0	0	2	0	0	0
NC_004556.1	183190	Xylella fastidiosa Temecula1	2	2	0	0	0	2	0	0	0
NC_017587.1	798128	Thermus thermophilus JL-18	2	2	0	0	0	2	0	0	0
NC_019435.1	1111678	Lactococcus lactis subsp. cremoris UC509.9	1	1	0	0	0	1	0	0	0
NC_008600.1	412694	Bacillus thuringiensis str. Al Hakam	4	4	0	0	0	1	0	0	0
NC_008942.1	410358	Methanocorpusculum labreanum Z	0	0	0	0	0	0	0	0	0
NZ_CP002580.1	595500	Burkholderia glumae PG1	7	7	0	0	0	3	0	0	0
NZ_CP010327.1	1583100	Myroides sp. A21	5	4	0	0	0	4	0	0	0
NZ_CP007600.1	1639	Listeria monocytogenes	2	2	0	0	0	2	0	0	0
NC_010581.1	395963	Beijerinckia indica subsp. indica ATCC 9039	2	2	0	0	0	2	0	0	0
NC_021006.1	869303	Streptococcus pneumoniae SPN034156	1	1	0	0	0	1	0	0	0
NC_015847.1	1053692	Methanococcus maripaludis X1	3	3	0	0	0	3	0	0	0
NZ_HG813247.1	1437838	Listeria monocytogenes R479a	1	1	0	0	0	1	0	0	0
NC_018015.1	163003	Thermococcus cleftensis	2	2	0	0	0	1	0	0	0
NZ_CP006825.1	1382925	Helicobacter pylori oki673	2	2	0	0	0	2	0	0	0
NC_010505.1	426355	Methylobacterium radiotolerans JCM 2831	5	4	0	0	0	4	0	0	0
NC_000917.1	224325	Archaeoglobus fulgidus DSM 4304	2	2	0	0	0	2	0	0	0
NZ_LN831027.1	76857	Fusobacterium nucleatum subsp. polymorphum	0	0	0	0	0	0	0	0	0
NZ_CP006690.1	1051650	Lactobacillus casei 12A	1	1	0	0	0	0	0	0	0
NC_020908.1	391616	Octadecabacter arcticus 238	4	4	0	0	0	4	0	0	0
NZ_CP006792.1	1345702	Yersinia pestis 2944	3	3	0	0	0	0	0	0	0
NC_021050.1	1263406	Chlamydia trachomatis L2/434/Bu(i)	0	0	0	0	0	0	0	0	0
NZ_CP007399.1	287	Pseudomonas aeruginosa	3	3	0	0	0	3	0	0	0
NC_017052.1	1080229	Synechocystis sp. PCC 6803 substr. PCC-N	3	3	0	0	0	3	0	0	0
NC_006396.1	272569	Haloarcula marismortui ATCC 43049	4	4	0	0	0	3	0	0	0
NC_017171.1	497978	Acinetobacter baumannii MDR-ZJ06	3	2	0	0	0	2	0	0	0
NC_017025.1	1094466	Flavobacterium indicum GPTSA100-9 = DSM 17447	2	2	0	0	0	2	0	0	0
NC_018142.1	767029	Propionibacterium propionicum F0230a	2	2	0	0	0	2	0	0	0
NC_016114.1	591167	Streptomyces pratensis ATCC 33331	8	8	0	0	0	3	0	0	0
NC_015433.1	1007064	Streptococcus suis ST3	0	0	0	0	0	0	0	0	0
NZ_CP001621.1	436113	Mycoplasma mycoides subsp. capri str. GM12	0	0	0	0	0	0	0	0	0
NC_007681.1	339860	Methanosphaera stadtmanae DSM 3091	0	0	0	0	0	0	0	0	0
NZ_CP012573.1	28447	Clavibacter michiganensis	1	1	0	0	0	1	0	0	0
NC_009850.1	367737	Arcobacter butzleri RM4018	0	0	0	0	0	0	0	0	0
NZ_CP010283.1	796733	Salmonella enterica subsp. enterica serovar Newport str. CVM 21550	1	1	0	0	0	1	0	0	0
NZ_CP001974.1	673518	Bacillus anthracis str. A16R	4	4	0	0	0	0	0	0	0
NC_016603.1	871585	Acinetobacter calcoaceticus PHEA-2	4	4	0	0	0	3	0	0	0
NC_015067.1	565042	Bifidobacterium longum subsp. longum JCM 1217	3	2	0	0	0	1	0	0	0
NZ_CP009906.1	360102	Yersinia pestis Antiqua	2	2	0	0	0	0	0	0	0
NC_013173.1	525897	Desulfomicrobium baculatum DSM 4028	7	7	0	0	0	7	0	0	0
NC_014659.1	685727	Rhodococcus equi 103S	3	2	0	0	0	2	0	0	0
NC_017730.2	1087451	Corynebacterium pseudotuberculosis 31	1	1	0	0	0	1	0	0	0
NZ_CP011343.2	1411691	Escherichia coli GM4792	1	0	0	0	0	0	0	0	0
NC_012125.1	476213	Salmonella enterica subsp. enterica serovar Paratyphi C str. RKS4594	3	3	0	0	0	2	0	0	0
NZ_CP006837.1	1145276	Lysinibacillus varians	5	5	0	0	0	5	0	0	0
NC_018410.1	1159201	Mycoplasma gallisepticum WI01_2001.043-13-2P	0	0	0	0	0	0	0	0	0
NC_008609.1	338966	Pelobacter propionicus DSM 2379	3	3	0	0	0	3	0	0	0
NZ_CP006882.1	166314	Synechococcus sp. WH 8109	1	1	0	0	0	1	0	0	0
NC_003116.1	122587	Neisseria meningitidis Z2491	1	1	0	0	0	1	0	0	0
NZ_CP009749.1	1423	Bacillus subtilis	2	2	0	0	0	0	0	0	0
NC_023060.1	1431547	Chlamydia trachomatis C/TW-3	0	0	0	0	0	0	0	0	0
NZ_CP011855.1	1114980	Spiroplasma atrichopogonis	0	0	0	0	0	0	0	0	0
NC_023032.1	1401659	Cronobacter sakazakii CMCC 45402	2	2	0	0	0	2	0	0	0
NC_021891.1	907270	Chlamydia trachomatis RC-J(s)/122	1	1	0	0	0	1	0	0	0
NZ_CP009488.1	1249668	Burkholderia ubonensis MSMB22	3	3	0	0	0	3	0	0	0
NC_009792.1	290338	Citrobacter koseri ATCC BAA-895	5	3	0	0	0	3	0	0	0
NC_004668.1	226185	Enterococcus faecalis V583	2	2	0	0	0	2	0	0	0
NC_023037.2	1429244	Paenibacillus polymyxa CR1	4	4	0	0	0	2	0	0	0
NC_014121.1	716541	Enterobacter cloacae subsp. cloacae ATCC 13047	3	2	0	0	0	2	0	0	0
NC_007954.1	318161	Shewanella denitrificans OS217	1	1	0	0	0	1	0	0	0
NZ_CP009170.1	2325	Thermoanaerobacter kivui	3	3	0	0	0	3	0	0	0
NC_022243.1	528354	Neisseria gonorrhoeae MS11	0	0	0	0	0	0	0	0	0
NC_021896.1	907266	Chlamydia trachomatis RC-J/943	1	1	0	0	0	1	0	0	0
NC_013119.1	568815	Brucella microti CCM 4915	3	3	0	0	0	0	0	0	0
NC_015758.1	572418	Mycobacterium africanum GM041182	1	1	0	0	0	0	0	0	0
NC_004193.1	221109	Oceanobacillus iheyensis HTE831	2	2	0	0	0	2	0	0	0
NC_008702.1	62928	Azoarcus sp. BH72	4	3	0	0	0	3	0	0	0
NC_007776.1	321332	Synechococcus sp. JA-2-3B'a(2-13)	5	5	0	0	0	3	0	0	0
NC_015580.1	702113	Novosphingobium sp. PP1Y	1	1	0	0	0	1	0	0	0
NC_017622.1	993512	Streptococcus suis A7	1	1	0	0	0	1	0	0	0
NZ_CP003811.1	693986	Methylobacterium oryzae CBMB20	4	4	0	0	0	4	0	0	0
NC_022513.1	1366050	Ralstonia pickettii DTP0602	6	6	0	0	0	6	0	0	0
NZ_CP006870.1	1416915	Aeromonas hydrophila NJ-35	6	6	0	0	0	6	0	0	0
NC_015672.1	717231	Flexistipes sinusarabici DSM 4947	1	1	0	0	0	1	0	0	0
NC_018081.1	768486	Enterococcus hirae ATCC 9790	3	3	0	0	0	3	0	0	0
NC_011963.1	557760	Rhodobacter sphaeroides KD131	3	3	0	0	0	3	0	0	0
NC_013202.1	485914	Halomicrobium mukohataei DSM 12286	2	2	0	0	0	2	0	0	0
NC_012947.1	866768	Escherichia coli 'BL21-Gold(DE3)pLysS AG'	1	0	0	0	0	0	0	0	0
NC_014974.1	743525	Thermus scotoductus SA-01	2	2	0	0	0	2	0	0	0
NC_007651.1	271848	Burkholderia thailandensis E264	6	6	0	0	0	6	0	0	0
NZ_CP008876.1	586416	Terribacillus aidingensis	2	2	0	0	0	2	0	0	0
NC_021286.1	1321370	Idiomarina loihiensis GSL 199	3	3	0	0	0	3	0	0	0
NC_012881.1	526222	Desulfovibrio salexigens DSM 2638	1	1	0	0	0	1	0	0	0
NZ_CP011446.1	520	Bordetella pertussis	3	3	0	0	0	0	0	0	0
NZ_CP007669.1	480	Moraxella catarrhalis	2	2	0	0	0	2	0	0	0
NZ_CP007804.1	90371	Salmonella enterica subsp. enterica serovar Typhimurium	3	1	0	0	0	1	0	0	0
NC_017857.2	754476	Methylophaga nitratireducenticrescens	1	1	0	0	0	1	0	0	0
NC_011834.1	561501	Buchnera aphidicola str. Tuc7 (Acyrthosiphon pisum)	1	1	0	0	0	1	0	0	0
NZ_CP009642.1	13373	Burkholderia mallei	0	0	0	0	0	0	0	0	0
NC_017584.1	1036743	Rhodospirillum rubrum F11	2	2	0	0	0	2	0	0	0
NC_007429.1	315277	Chlamydia trachomatis A/HAR-13	2	2	0	0	0	2	0	0	0
NC_009482.1	316278	Synechococcus sp. RCC307	1	1	0	0	0	1	0	0	0
NZ_CP008831.1	1328325	Klebsiella pneumoniae subsp. pneumoniae KPR0928	4	4	0	0	0	4	0	0	0
NC_010602.1	456481	Leptospira biflexa serovar Patoc strain 'Patoc 1 (Paris)'	4	4	0	0	0	4	0	0	0
NC_013456.1	150340	Vibrio antiquarius	1	1	0	0	0	1	0	0	0
NZ_CP007470.1	727	Haemophilus influenzae	1	1	0	0	0	1	0	0	0
NC_018525.1	1218933	Pectobacterium carotovorum subsp. carotovorum PCC21	3	3	0	0	0	3	0	0	0
NZ_CP002082.1	838561	Spiroplasma mirum ATCC 29335	1	1	0	0	0	0	0	0	0
NC_003450.3	196627	Corynebacterium glutamicum ATCC 13032	3	3	0	0	0	2	0	0	0
NC_014205.1	591019	Staphylothermus hellenicus DSM 12710	0	0	0	0	0	0	0	0	0
NC_011567.1	491915	Anoxybacillus flavithermus WK1	1	1	0	0	0	1	0	0	0
NC_014632.1	572544	Ilyobacter polytropus DSM 2926	2	2	0	0	0	2	0	0	0
NZ_CP007700.1	235	Brucella abortus	5	5	0	0	0	0	0	0	0
NC_014926.1	648996	Thermovibrio ammonificans HB-1	0	0	0	0	0	0	0	0	0
NZ_CP008918.1	747	Pasteurella multocida	2	1	0	0	0	1	0	0	0
NC_017304.1	637887	Ruminiclostridium thermocellum DSM 1313	1	1	0	0	0	1	0	0	0
NC_002737.2	160490	Streptococcus pyogenes M1 GAS	1	1	0	0	0	1	0	0	0
NC_011134.1	552526	Streptococcus equi subsp. zooepidemicus MGCS10565	2	2	0	0	0	2	0	0	0
NC_015416.1	990316	Methanosaeta concilii GP6	5	5	0	0	0	5	0	0	0
NZ_CP007560.1	1314	Streptococcus pyogenes	0	0	0	0	0	0	0	0	0
NZ_CP012045.1	1314	Streptococcus pyogenes	0	0	0	0	0	0	0	0	0
NC_011832.1	521011	Methanosphaerula palustris E1-9c	1	1	0	0	0	1	0	0	0
NZ_CP009283.1	1536772	Paenibacillus sp. FSL R7-0273	3	3	0	0	0	3	0	0	0
NC_016933.1	1001542	Francisella tularensis subsp. tularensis TIGB03	1	1	0	0	0	1	0	0	0
NC_007775.1	321327	Synechococcus sp. JA-3-3Ab	2	2	0	0	0	2	0	0	0
NC_018709.3	1201032	Campylobacter jejuni subsp. jejuni PT14	2	2	0	0	0	2	0	0	0
NC_017571.1	693974	Shewanella baltica BA175	2	2	0	0	0	2	0	0	0
NC_017668.1	866895	Halobacillus halophilus DSM 2266	2	2	0	0	0	2	0	0	0
NC_018645.1	651182	Desulfobacula toluolica Tol2	4	3	0	0	0	3	0	0	0
NZ_CP006950.1	1432060	Dehalococcoides mccartyi CG4	1	1	0	0	0	1	0	0	0
NZ_CP012647.1	1747	Propionibacterium acnes	1	1	0	0	0	1	0	0	0
NC_014029.1	637386	Yersinia pestis Z176003	2	2	0	0	0	0	0	0	0
NC_011993.1	591946	Escherichia coli LF82	1	1	0	0	0	1	0	0	0
NC_015682.1	795359	Thermodesulfobacterium geofontis OPF15	0	0	0	0	0	0	0	0	0
NZ_CP009554.1	46170	Staphylococcus aureus subsp. aureus	1	1	0	0	0	0	0	0	0
NZ_CP009933.1	1548	Clostridium scatologenes	6	5	0	0	0	4	0	0	0
NZ_CP009460.1	158822	Cedecea neteri	4	3	0	0	0	3	0	0	0
NC_021083.1	1292033	Mycoplasma putrefaciens Mput9231	2	1	0	0	0	1	0	0	0
NC_020089.1	1138877	Mycobacterium tuberculosis 7199-99	5	5	0	0	0	0	0	0	0
NZ_CP011930.1	964	Herbaspirillum seropedicae	1	1	0	0	0	1	0	0	0
NC_017672.3	997761	Paenibacillus mucilaginosus K02	2	2	0	0	0	2	0	0	0
NZ_CP010019.1	539329	Francisella philomiragia subsp. philomiragia ATCC 25015	2	1	0	0	0	1	0	0	0
NC_015312.1	675635	Pseudonocardia dioxanivorans CB1190	4	2	0	0	0	2	0	0	0
NC_012441.1	546272	Brucella melitensis ATCC 23457	4	4	0	0	0	0	0	0	0
NC_021839.1	1639	Listeria monocytogenes	1	1	0	0	0	1	0	0	0
NZ_CP008780.1	28450	Burkholderia pseudomallei	5	3	0	0	0	0	0	0	0
NC_013889.1	396595	Thioalkalivibrio sp. K90mix	1	1	0	0	0	1	0	0	0
NZ_CP007531.1	984211	Salmonella enterica subsp. enterica serovar Anatum str. ATCC BAA-1592	4	3	0	0	0	2	0	0	0
NZ_CP009274.1	244366	Klebsiella variicola	8	7	0	0	0	0	0	0	0
NZ_FO704550.1	351671	Xenorhabdus doucetiae	0	0	0	0	0	0	0	0	0
NZ_CP013131.1	1403338	Porphyromonas gingivalis A7A1-28	1	1	0	0	0	1	0	0	0
NC_008529.1	321956	Lactobacillus delbrueckii subsp. bulgaricus ATCC BAA-365	2	1	0	0	0	1	0	0	0
NC_021005.1	869307	Streptococcus pneumoniae SPN994039	1	1	0	0	0	1	0	0	0
NC_010410.1	509173	Acinetobacter baumannii AYE	1	1	0	0	0	0	0	0	0
NZ_CP012889.1	1403335	Porphyromonas gingivalis 381	1	1	0	0	0	1	0	0	0
NC_022370.1	1382700	Escherichia coli PMV-1	1	1	0	0	0	1	0	0	0
NC_021064.1	1170318	Propionibacterium avidum 44067	2	2	0	0	0	2	0	0	0
NC_010120.1	374833	Neisseria meningitidis 053442	1	1	0	0	0	1	0	0	0
NZ_LN908249.1	754345	Actinobacillus pleuropneumoniae serovar 8	3	3	0	0	0	3	0	0	0
NZ_CP009832.1	985079	Burkholderia multivorans ATCC BAA-247	4	4	0	0	0	3	0	0	0
NC_014364.1	573413	Spirochaeta smaragdinae DSM 11293	1	1	0	0	0	1	0	0	0
NZ_CP011495.1	562	Escherichia coli	5	2	0	0	0	2	0	0	0
NZ_CP007502.1	272556	Aggregatibacter actinomycetemcomitans HK1651	2	2	0	0	0	2	0	0	0
NZ_CP010542.1	1263756	Mycoplasma pneumoniae 54089	1	1	0	0	0	1	0	0	0
NC_017952.1	1071759	Chlamydia trachomatis E/SW3	0	0	0	0	0	0	0	0	0
NZ_CP011303.1	614	Serratia liquefaciens	5	5	0	0	0	4	0	0	0
NC_017146.1	634456	Acetobacter pasteurianus IFO 3283-26	2	2	0	0	0	2	0	0	0
NZ_CP006688.1	1385722	Campylobacter jejuni subsp. jejuni NCTC 11168-mfK12E5	3	3	0	0	0	2	0	0	0
NZ_CP007731.1	1328324	Klebsiella pneumoniae subsp. pneumoniae KPNIH27	3	2	0	0	0	0	0	0	0
NC_009337.1	290318	Chlorobium phaeovibrioides DSM 265	1	1	0	0	0	1	0	0	0
NC_019738.1	1173027	Microcoleus sp. PCC 7113	2	2	0	0	0	2	0	0	0
NC_015424.1	998088	Aeromonas veronii B565	3	3	0	0	0	3	0	0	0
NC_019907.1	1215343	Liberibacter crescens BT-1	3	3	0	0	0	3	0	0	0
NC_017946.1	1183377	Pyrococcus sp. ST04	2	2	0	0	0	2	0	0	0
NZ_LN515399.1	40480	Mycoplasma capricolum subsp. capripneumoniae	0	0	0	0	0	0	0	0	0
NC_003106.2	273063	Sulfolobus tokodaii str. 7	1	1	0	0	0	1	0	0	0
NC_000921.1	85963	Helicobacter pylori J99	1	1	0	0	0	1	0	0	0
NC_004603.1	223926	Vibrio parahaemolyticus RIMD 2210633	5	5	0	0	0	5	0	0	0
NC_007404.1	292415	Thiobacillus denitrificans ATCC 25259	1	1	0	0	0	1	0	0	0
NC_017592.1	869215	Streptococcus pneumoniae OXC141	3	3	0	0	0	2	0	0	0
NC_022523.1	1167629	Bifidobacterium animalis subsp. lactis ATCC 27673	0	0	0	0	0	0	0	0	0
NZ_CP010268.1	1406	Paenibacillus polymyxa	5	5	0	0	0	5	0	0	0
NC_007947.1	265072	Methylobacillus flagellatus KT	2	2	0	0	0	2	0	0	0
NC_006361.1	247156	Nocardia farcinica IFM 10152	2	2	0	0	0	2	0	0	0
NC_014378.1	574087	Acetohalobium arabaticum DSM 5501	4	4	0	0	0	4	0	0	0
NC_002953.3	282459	Staphylococcus aureus subsp. aureus MSSA476	2	2	0	0	0	2	0	0	0
NC_009485.1	288000	Bradyrhizobium sp. BTAi1	6	5	0	0	0	5	0	0	0
NC_017351.1	1123523	Staphylococcus aureus subsp. aureus 11819-97	2	2	0	0	0	2	0	0	0
NC_017275.1	930943	Sulfolobus islandicus HVE10/4	0	0	0	0	0	0	0	0	0
NZ_CP007476.1	1249653	Ehrlichia chaffeensis str. Liberty	0	0	0	0	0	0	0	0	0
NC_010609.1	557433	Lactobacillus reuteri JCM 1112	1	1	0	0	0	1	0	0	0
NC_015215.1	990317	Streptococcus gallolyticus subsp. gallolyticus ATCC BAA-2069	1	1	0	0	0	1	0	0	0
NC_017379.1	1055529	Helicobacter pylori Puno135	2	2	0	0	0	2	0	0	0
NC_011773.1	405535	Bacillus cereus AH820	4	4	0	0	0	0	0	0	0
NZ_CP007574.1	68570	Streptomyces albulus	7	7	0	0	0	6	0	1	0
NZ_CP010521.1	1491	Clostridium botulinum	2	2	0	0	0	2	0	0	0
NZ_CP007409.1	1404258	Bacillus subtilis subsp. subtilis str. OH 131.1	3	3	0	0	0	0	0	0	0
NC_015508.1	861208	Agrobacterium sp. H13-3	3	3	0	0	0	1	0	0	0
NC_019425.2	1234679	Carnobacterium maltaromaticum LMA28	2	2	0	0	0	2	0	0	0
NC_017368.1	866344	Helicobacter pylori F16	2	2	0	0	0	2	0	0	0
NZ_CP009088.1	149539	Salmonella enterica subsp. enterica serovar Enteritidis	3	3	0	0	0	2	0	0	0
NC_017059.1	1150469	Pararhodospirillum photometricum DSM 122	5	5	0	0	0	5	0	0	0
NC_013410.1	59374	Fibrobacter succinogenes subsp. succinogenes S85	1	1	0	0	0	1	0	0	0
NZ_CP008985.1	186490	Candidatus Baumannia cicadellinicola	0	0	0	0	0	0	0	0	0
NC_018664.1	1128398	[Clostridium] acidurici 9a	3	3	0	0	0	3	0	0	0
[truncated: 2,280 more rows]

## Sheet: megablast
Sequence Id	Taxonomy Id	Scientific Name	# of reads from 10K	Genus_Correct	Genus_Multi+Correct	Genus_Incorrect	Genus_Multi+Incorrect	Species_Correct	Species_Multi+Correct	Species_Incorrect	Species_Multi+Incorrect
NZ_CP009261.1	672	Vibrio vulnificus	2	2	0	0	0	2	0	0	0
NC_017253.1	713601	Buchnera aphidicola str. JF99 (Acyrthosiphon pisum)	2	1	0	0	0	1	0	0	0
NZ_CP008984.1	272556	Aggregatibacter actinomycetemcomitans HK1651	0	0	0	0	0	0	0	0	0
NZ_CP006823.1	1382923	Helicobacter pylori oki154	1	1	0	0	0	1	0	0	0
NZ_LN907858.1	76936	Helicobacter typhlonius	4	4	0	0	0	3	1	0	0
NC_018101.1	996634	Corynebacterium ulcerans 0102	2	1	0	0	0	1	0	0	0
NC_017262.1	555217	Zymomonas mobilis subsp. mobilis ATCC 10988	1	1	0	0	0	1	0	0	0
NZ_CP010276.1	96345	Flavobacterium psychrophilum	0	0	0	0	0	0	0	0	0
NZ_CP009408.1	319705	Mycobacterium abscessus subsp. bolletii	1	1	0	0	0	1	0	0	0
NZ_CP007566.1	1418110	Aeromonas hydrophila AL09-71	0	0	0	0	0	0	0	0	0
NZ_CP007793.1	192	Azospirillum brasilense	2	2	0	0	0	2	0	0	0
NC_004631.1	209261	Salmonella enterica subsp. enterica serovar Typhi str. Ty2	1	1	0	0	0	1	0	0	0
NC_014501.1	497965	Cyanothece sp. PCC 7822	1	1	0	0	0	1	0	0	0
NZ_CP007505.1	1003191	Salmonella enterica subsp. enterica serovar Tennessee str. TXSC_TXSC08-19	0	0	0	0	0	0	0	0	0
NZ_CP011004.1	1639	Listeria monocytogenes	5	4	0	0	0	4	0	0	0
NZ_HF572917.1	562	Escherichia coli	5	2	3	0	0	2	3	0	0
NC_017027.1	1132496	Pasteurella multocida subsp. multocida str. HN06	0	0	0	0	0	0	0	0	0
NZ_CP009847.1	670	Vibrio parahaemolyticus	4	4	0	0	0	4	0	0	0
NC_016516.1	1114966	Propionibacterium acnes TypeIA2 P.acn33	2	2	0	0	0	2	0	0	0
NC_014925.1	937773	Staphylococcus pseudintermedius HKU10-03	2	2	0	0	0	2	0	0	0
NC_014318.1	749927	Amycolatopsis mediterranei U32	3	3	0	0	0	3	0	0	0
NZ_CP007806.1	1042163	Brevibacillus laterosporus LMG 15441	4	4	0	0	0	4	0	0	0
NZ_LN774769.1	297352	Lactococcus piscium MKFS47	2	2	0	0	0	2	0	0	0
NZ_CP012370.1	1525	Moorella thermoacetica	1	1	0	0	0	1	0	0	0
NC_022529.1	1347340	Campylobacter jejuni 4031	0	0	0	0	0	0	0	0	0
NC_022196.1	469604	Fusobacterium nucleatum subsp. vincentii 3_1_36A2	0	0	0	0	0	0	0	0	0
NC_018527.1	1229785	Burkholderia pseudomallei BPC006	2	2	0	0	0	1	1	0	0
NC_017214.1	552531	Bifidobacterium animalis subsp. lactis BB-12	1	1	0	0	0	1	0	0	0
NC_014494.1	574093	Streptococcus pneumoniae AP200	3	3	0	0	0	3	0	0	0
NC_017904.1	1168287	Mycobacterium sp. MOTT36Y	3	3	0	0	0	0	3	0	0
NZ_CP011572.1	550	Enterobacter cloacae	2	2	0	0	0	2	0	0	0
NZ_CP009298.1	360118	Burkholderia pseudomallei 406e	5	4	0	0	0	3	1	0	0
NC_018937.1	1234365	Helicobacter pylori Rif1	2	2	0	0	0	2	0	0	0
NC_017251.1	204722	Brucella suis 1330	1	1	0	0	0	0	1	0	0
NC_012440.1	123214	Persephonella marina EX-H1	1	1	0	0	0	1	0	0	0
NC_010943.1	522373	Stenotrophomonas maltophilia K279a	4	4	0	0	0	4	0	0	0
NZ_CP006758.1	1345705	Yersinia pestis 1522	4	4	0	0	0	0	4	0	0
NZ_CP011246.1	358	Agrobacterium tumefaciens	6	6	0	0	0	5	1	0	0
NZ_CP010409.1	56458	Xanthomonas sacchari	4	4	0	0	0	4	0	0	0
NZ_CP006711.1	1385938	Bifidobacterium breve 12L	2	2	0	0	0	1	1	0	0
NC_021878.1	1036172	Arcobacter butzleri 7h1h	3	3	0	0	0	3	0	0	0
NC_003062.2	176299	Agrobacterium fabrum str. C58	8	8	0	0	0	7	1	0	0
NZ_CP009503.1	1434103	Methanosarcina sp. WWM596	3	3	0	0	0	0	3	0	0
NC_010280.2	471473	Chlamydia trachomatis L2b/UCH-1/proctitis	1	1	0	0	0	1	0	0	0
NC_015930.1	420889	Lactococcus garvieae ATCC 49156	0	0	0	0	0	0	0	0	0
NC_007333.1	269800	Thermobifida fusca YX	2	2	0	0	0	2	0	0	0
NC_004070.1	198466	Streptococcus pyogenes MGAS315	2	2	0	0	0	1	1	0	0
NZ_CP009428.1	189426	Paenibacillus odorifer	3	3	0	0	0	3	0	0	0
NZ_CP012559.1	1074467	Lactobacillus heilongjiangensis	1	1	0	0	0	1	0	0	0
NC_017617.1	423211	Streptococcus suis GZ1	0	0	0	0	0	0	0	0	0
NZ_CP010907.1	1235990	Candidatus Pantoea carbekii	1	1	0	0	0	1	0	0	0
NC_017525.1	1081094	Legionella pneumophila subsp. pneumophila str. Hextuple_2q	3	3	0	0	0	3	0	0	0
NZ_CP007584.1	1454585	Salmonella enterica subsp. enterica serovar Anatum str. USDA-ARS-USMARC-1735	2	2	0	0	0	2	0	0	0
NC_012673.1	360911	Exiguobacterium sp. AT1b	2	2	0	0	0	2	0	0	0
NC_013441.1	526226	Gordonia bronchialis DSM 43247	4	4	0	0	0	4	0	0	0
NC_021351.1	1232381	Corynebacterium glutamicum SCgG1	2	2	0	0	0	2	0	0	0
NZ_AP014565.1	996633	Salmonella enterica subsp. enterica serovar Typhimurium str. L-3553	4	4	0	0	0	3	0	1	0
NC_009436.1	399742	Enterobacter sp. 638	2	2	0	0	0	2	0	0	0
NZ_AP014683.1	1469502	Burkholderiales bacterium GJ-E10	0	0	0	0	0	0	0	0	0
NC_008531.1	203120	Leuconostoc mesenteroides subsp. mesenteroides ATCC 8293	1	1	0	0	0	1	0	0	0
NC_011852.1	557723	Haemophilus parasuis SH0165	1	1	0	0	0	1	0	0	0
NC_002505.1	243277	Vibrio cholerae O1 biovar El Tor str. N16961	4	4	0	0	0	4	0	0	0
NZ_CP009751.1	743277	Bordetella pertussis B1917	0	0	0	0	0	0	0	0	0
NC_004061.1	198804	Buchnera aphidicola str. Sg (Schizaphis graminum)	0	0	0	0	0	0	0	0	0
NC_010117.1	360115	Coxiella burnetii RSA 331	3	3	0	0	0	3	0	0	0
NC_017954.1	1184251	Thermogladius cellulolyticus 1633	0	0	0	0	0	0	0	0	0
NC_015945.1	886377	Muricauda ruestringensis DSM 13258	3	3	0	0	0	3	0	0	0
NC_011831.1	326427	Chloroflexus aggregans DSM 9485	5	4	0	0	0	4	0	0	0
NZ_CP008711.1	13373	Burkholderia mallei	3	3	0	0	0	0	3	0	0
NC_002607.1	64091	Halobacterium sp. NRC-1	1	1	0	0	0	1	0	0	0
NC_014006.1	452662	Sphingobium japonicum UT26S	4	4	0	0	0	3	1	0	0
NC_018013.1	746697	Aequorivita sublithincola DSM 14238	4	4	0	0	0	4	0	0	0
NZ_CP011295.1	1833	Rhodococcus erythropolis	3	3	0	0	0	3	0	0	0
NC_015663.1	1028307	Enterobacter aerogenes KCTC 2190	1	1	0	0	0	1	0	0	0
NZ_CP010850.1	29461	Brucella suis	0	0	0	0	0	0	0	0	0
NZ_CP011618.1	571	Klebsiella oxytoca	4	2	1	0	0	2	1	0	0
NC_007297.2	293653	Streptococcus pyogenes MGAS5005	0	0	0	0	0	0	0	0	0
NC_016811.1	933093	Legionella pneumophila subsp. pneumophila ATCC 43290	2	2	0	0	0	2	0	0	0
NC_018491.1	1217984	Bacillus cereus FRI-35	4	4	0	0	0	4	0	0	0
NZ_CP012372.1	543737	Francisella tularensis subsp. tularensis MA00-2987	2	2	0	0	0	2	0	0	0
NZ_CP009524.1	1434099	Methanosarcina sp. Kolksee	4	4	0	0	0	1	2	1	0
NC_017763.1	1074252	Staphylococcus aureus subsp. aureus HO 5096 0412	3	3	0	0	0	3	0	0	0
NZ_CP007055.1	797299	Halostagnicola larsenii XH-48	3	3	0	0	0	3	0	0	0
NC_016633.1	158190	Sphaerochaeta pleomorpha str. Grapes	4	4	0	0	0	4	0	0	0
NC_013406.1	481743	Paenibacillus sp. Y412MC10	1	1	0	0	0	1	0	0	0
NC_015311.1	767031	Prevotella denticola F0289	0	0	0	0	0	0	0	0	0
NZ_LN794158.1	1581680	Candidatus Methylopumilus turicensis	0	0	0	0	0	0	0	0	0
NZ_CP011956.1	129394	Xanthomonas oryzae pv. oryzicola	4	4	0	0	0	4	0	0	0
NC_005364.2	272632	Mycoplasma mycoides subsp. mycoides SC str. PG1	1	0	0	0	0	0	0	0	0
NZ_CP009613.1	319705	Mycobacterium abscessus subsp. bolletii	3	3	0	0	0	3	0	0	0
NZ_CP007477.1	1249654	Ehrlichia chaffeensis str. Osceola	1	1	0	0	0	1	0	0	0
NZ_CP010539.1	1213463	Mycoplasma pneumoniae 19294	0	0	0	0	0	0	0	0	0
NC_017279.1	567106	Campylobacter jejuni subsp. jejuni IA3902	3	3	0	0	0	1	2	0	0
NC_017238.1	390236	Borrelia afzelii PKo	3	3	0	0	0	3	0	0	0
NC_008596.1	246196	Mycobacterium smegmatis str. MC2 155	2	2	0	0	0	2	0	0	0
NZ_CP009042.1	686	Vibrio cholerae O1 biovar El Tor	4	4	0	0	0	4	0	0	0
NC_002528.1	107806	Buchnera aphidicola str. APS (Acyrthosiphon pisum)	3	3	0	0	0	3	0	0	0
NC_022606.1	1266845	Carnobacterium inhibens subsp. gilichinskyi	1	1	0	0	0	1	0	0	0
NZ_CP010890.1	1280	Staphylococcus aureus	2	2	0	0	0	2	0	0	0
NZ_CP013334.1	1307444	Fusobacterium hwasookii ChDC F300	0	0	0	0	0	0	0	0	0
NC_013162.1	521097	Capnocytophaga ochracea DSM 7271	2	2	0	0	0	1	1	0	0
NC_009523.1	357808	Roseiflexus sp. RS-1	7	6	0	0	0	6	0	0	0
NZ_CP007666.1	261591	Bacillus anthracis str. Vollum	8	8	0	0	0	0	7	0	1
NC_009954.1	397948	Caldivirga maquilingensis IC-167	1	1	0	0	0	1	0	0	0
NC_010742.1	430066	Brucella abortus S19	3	3	0	0	0	0	3	0	0
NZ_CP009464.1	1392	Bacillus anthracis	3	3	0	0	0	0	3	0	0
NC_017080.1	1142394	Phycisphaera mikurensis NBRC 102666	3	3	0	0	0	3	0	0	0
NC_008817.1	167542	Prochlorococcus marinus str. MIT 9515	3	3	0	0	0	3	0	0	0
NZ_CP008921.1	1214179	Streptococcus suis 6407	1	1	0	0	0	1	0	0	0
NZ_LN868200.1	470	Acinetobacter baumannii	3	3	0	0	0	3	0	0	0
NZ_CP007067.1	1033991	Rhizobium leguminosarum bv. trifolii CB782	4	4	0	0	0	4	0	0	0
NZ_CP006692.1	1382510	Salmonella bongori serovar 48:z41:-- str. RKS3044	1	1	0	0	0	0	1	0	0
NC_014625.1	880591	Ketogulonicigenium vulgare Y25	3	3	0	0	0	3	0	0	0
NC_014125.1	423212	Legionella pneumophila 2300/99 Alcoy	0	0	0	0	0	0	0	0	0
NC_002944.2	262316	Mycobacterium avium subsp. paratuberculosis K-10	3	3	0	0	0	3	0	0	0
NZ_CP010954.1	484429	Sphingobium sp. YBL2	5	4	0	0	0	4	0	0	0
NZ_CP009631.1	1449978	Burkholderia vietnamiensis LMG 10929	8	8	0	0	0	5	2	1	0
NZ_CP011456.1	1647413	Anabaena sp. wa102	6	6	0	0	0	5	1	0	0
NC_020945.1	1071773	Chlamydia trachomatis L2b/8200/07	1	1	0	0	0	1	0	0	0
NC_017504.1	722438	Mycoplasma pneumoniae FH	1	1	0	0	0	1	0	0	0
NZ_CP009607.1	1450527	Francisella tularensis subsp. novicida D9876	3	3	0	0	0	2	1	0	0
NC_014391.1	644283	Micromonospora aurantiaca ATCC 27029	6	5	0	0	0	2	3	0	0
NZ_CP009704.1	632	Yersinia pestis	6	5	0	0	0	0	5	0	0
NZ_CP007420.1	1412458	Salmonella enterica subsp. enterica serovar Enteritidis str. EC20100103	5	5	0	0	0	5	0	0	0
NC_005043.1	182082	Chlamydophila pneumoniae TW-183	1	1	0	0	0	1	0	0	0
NC_011999.1	458233	Macrococcus caseolyticus JCSC5402	1	1	0	0	0	1	0	0	0
NC_017094.1	1162668	Leptospirillum ferrooxidans C2-3	3	3	0	0	0	3	0	0	0
NZ_CP009092.1	149539	Salmonella enterica subsp. enterica serovar Enteritidis	5	5	0	0	0	5	0	0	0
NC_017045.1	693978	Riemerella anatipestifer ATCC 11845 = DSM 15868	2	2	0	0	0	2	0	0	0
NC_021291.1	1260251	Spiribacter salinus M19-40	3	2	0	0	0	2	0	0	0
NC_021838.1	1639	Listeria monocytogenes	0	0	0	0	0	0	0	0	0
NC_017735.1	1163745	Helicobacter cetorum MIT 99-5656	0	0	0	0	0	0	0	0	0
NC_000922.1	115713	Chlamydophila pneumoniae CWL029	1	1	0	0	0	1	0	0	0
NC_017621.1	1004952	Streptococcus suis D12	1	1	0	0	0	1	0	0	0
NC_021659.1	1348660	Serratia plymuthica S13	4	4	0	0	0	3	1	0	0
NC_002162.1	273119	Ureaplasma parvum serovar 3 str. ATCC 700970	0	0	0	0	0	0	0	0	0
NC_010322.1	76869	Pseudomonas putida GB-1	5	5	0	0	0	5	0	0	0
NC_015722.1	696127	Candidatus Midichloria mitochondrii IricVA	1	1	0	0	0	1	0	0	0
NZ_CP007633.1	126738	Thermotoga sp. RQ7	1	1	0	0	0	0	1	0	0
NC_022905.1	1423891	Brucella ceti TE10759-12	3	3	0	0	0	0	3	0	0
NZ_CP012148.1	1597	Lactobacillus paracasei	0	0	0	0	0	0	0	0	0
NZ_CP004117.1	1249662	Burkholderia thailandensis E444	6	6	0	0	0	4	1	0	1
NC_018419.1	1199245	secondary endosymbiont of Ctenarytaina eucalypti	0	0	0	0	0	0	0	0	0
NC_012560.1	322710	Azotobacter vinelandii DJ	3	3	0	0	0	3	0	0	0
NZ_CP009706.1	1453496	Hafnia alvei FB1	2	2	0	0	0	2	0	0	0
NC_017249.1	1037409	Bradyrhizobium japonicum USDA 6	8	8	0	0	0	7	1	0	0
NZ_CBVU010000001.1	1407064	Erwinia amylovora LA637	0	0	0	0	0	0	0	0	0
NC_008740.1	351348	Marinobacter hydrocarbonoclasticus VT8	2	2	0	0	0	2	0	0	0
NZ_CP013106.1	1178482	Halomonas huangheensis	6	6	0	0	0	6	0	0	0
NZ_CP012070.1	1658671	Arsenicicoccus sp. oral taxon 190	3	3	0	0	0	3	0	0	0
NZ_CP008852.1	484770	Pelosinus sp. UFO1	4	3	0	0	0	3	0	0	0
NC_008698.1	368408	Thermofilum pendens Hrk 5	5	5	0	0	0	5	0	0	0
NC_011658.1	405534	Bacillus cereus AH187	3	3	0	0	0	3	0	0	0
NC_017453.1	510831	Francisella tularensis subsp. tularensis NE061598	3	2	0	0	0	2	0	0	0
NC_014207.1	666681	Methylotenera versatilis 301	2	2	0	0	0	2	0	0	0
NC_020063.1	693444	Enterobacteriaceae bacterium strain FGI 57	0	0	0	0	0	0	0	0	0
NC_009901.1	398579	Shewanella pealeana ATCC 700345	3	3	0	0	0	3	0	0	0
NC_014830.1	710696	Intrasporangium calvum DSM 43043	1	1	0	0	0	1	0	0	0
NZ_CP011051.1	1423	Bacillus subtilis	4	3	0	0	0	3	0	0	0
NC_008346.1	335541	Syntrophomonas wolfei subsp. wolfei str. Goettingen G311	2	2	0	0	0	2	0	0	0
NC_021879.1	1184253	Anaplasma phagocytophilum str. HZ2	3	3	0	0	0	3	0	0	0
NC_010994.1	491916	Rhizobium etli CIAT 652	3	3	0	0	0	3	0	0	0
NZ_ABIZ01000001.1	240016	Verrucomicrobium spinosum DSM 4136 = JCM 18804	4	4	0	0	0	4	0	0	0
NC_017513.1	935599	Neisseria meningitidis G2136	0	0	0	0	0	0	0	0	0
NZ_CP009227.1	1539298	Treponema sp. OMZ 838	0	0	0	0	0	0	0	0	0
NC_016593.1	1111068	Geobacillus thermoleovorans CCB_US3_UF5	2	2	0	0	0	0	2	0	0
NZ_CP007035.1	929713	Niabella soli DSM 19437	3	3	0	0	0	3	0	0	0
NC_010655.1	349741	Akkermansia muciniphila ATCC BAA-835	1	1	0	0	0	1	0	0	0
NC_011663.1	407976	Shewanella baltica OS223	5	5	0	0	0	5	0	0	0
NZ_CP009104.1	562	Escherichia coli	1	1	0	0	0	1	0	0	0
NC_022442.1	1201010	Staphylococcus aureus subsp. aureus SA957	1	1	0	0	0	1	0	0	0
NC_009455.1	216389	Dehalococcoides mccartyi BAV1	0	0	0	0	0	0	0	0	0
NC_020125.1	1271752	Riemerella anatipestifer RA-CH-2	0	0	0	0	0	0	0	0	0
NC_018018.1	880071	Flexibacter litoralis DSM 6794	1	1	0	0	0	1	0	0	0
NC_010287.1	471472	Chlamydia trachomatis 434/Bu	0	0	0	0	0	0	0	0	0
NC_017048.1	1105098	Rickettsia prowazekii str. GvV257	1	1	0	0	0	1	0	0	0
NZ_CP008905.1	1333849	Enterobacter cloacae ECR091	2	2	0	0	0	2	0	0	0
NZ_CP007051.1	694431	Desulfurella acetivorans A63	0	0	0	0	0	0	0	0	0
NC_018528.1	880633	Lactobacillus helveticus R0052	0	0	0	0	0	0	0	0	0
NC_010717.2	360094	Xanthomonas oryzae pv. oryzae PXO99A	5	5	0	0	0	5	0	0	0
NC_015259.1	991905	Polymorphum gilvum SL003B-26A1	0	0	0	0	0	0	0	0	0
NC_008571.1	411154	Gramella forsetii KT0803	2	2	0	0	0	2	0	0	0
NC_020300.1	1094489	Bartonella australis Aust/NH1	0	0	0	0	0	0	0	0	0
NC_007705.1	342109	Xanthomonas oryzae pv. oryzae MAFF 311018	8	8	0	0	0	8	0	0	0
NC_015684.1	504832	Oligotropha carboxidovorans OM5	0	0	0	0	0	0	0	0	0
NZ_CP010433.1	28025	Bifidobacterium animalis	3	3	0	0	0	3	0	0	0
NZ_CP008704.1	13373	Burkholderia mallei	5	5	0	0	0	1	3	1	0
NC_017911.1	1037911	Pseudomonas fluorescens A506	7	7	0	0	0	7	0	0	0
NC_012704.1	645127	Corynebacterium kroppenstedtii DSM 44385	1	1	0	0	0	1	0	0	0
NZ_CP006911.1	1125411	Candidatus Thioglobus singularis PS1	3	3	0	0	0	3	0	0	0
NC_018011.1	679935	Alistipes finegoldii DSM 17242	2	2	0	0	0	2	0	0	0
NC_009663.1	387093	Sulfurovum sp. NBC37-1	2	2	0	0	0	2	0	0	0
NC_017308.1	1087454	Corynebacterium pseudotuberculosis 1/06-A	2	2	0	0	0	2	0	0	0
NZ_CP007495.1	1172205	Bordetella holmesii 44057	3	3	0	0	0	3	0	0	0
NC_007168.1	279808	Staphylococcus haemolyticus JCSC1435	1	1	0	0	0	1	0	0	0
NZ_CP010298.1	1280	Staphylococcus aureus	0	0	0	0	0	0	0	0	0
NC_013282.2	693216	Siccibacter turicensis z3032	2	2	0	0	0	2	0	0	0
NZ_CP011574.1	548	Enterobacter aerogenes	2	2	0	0	0	2	0	0	0
NC_015474.1	342949	Pyrococcus sp. NA2	1	1	0	0	0	1	0	0	0
NC_014934.1	688270	Cellulophaga algicola DSM 14237	4	3	0	0	0	3	0	0	0
NZ_CP012359.1	1697052	Pseudomonadaceae bacterium C6819	0	0	0	0	0	0	0	0	0
NZ_CP013146.1	1719	Corynebacterium pseudotuberculosis	0	0	0	0	0	0	0	0	0
NC_010079.1	451516	Staphylococcus aureus subsp. aureus USA300_TCH1516	2	2	0	0	0	2	0	0	0
NC_020509.1	1248726	Helicobacter pylori OK310	0	0	0	0	0	0	0	0	0
NC_015563.1	742013	Delftia sp. Cs1-4	7	6	0	0	0	5	1	0	0
NC_021744.1	326425	Lactobacillus helveticus CNRZ32	4	4	0	0	0	4	0	0	0
NC_012779.2	634503	Edwardsiella ictaluri 93-146	0	0	0	0	0	0	0	0	0
NZ_CP010541.1	1263758	Mycoplasma pneumoniae 51494	2	2	0	0	0	2	0	0	0
NZ_CP009997.1	28152	Yersinia kristensenii	8	7	1	0	0	0	8	0	0
NZ_CP002427.1	767456	Lactobacillus helveticus H9	2	2	0	0	0	2	0	0	0
NC_007335.2	59920	Prochlorococcus marinus str. NATL2A	1	1	0	0	0	1	0	0	0
NC_018140.1	91891	Legionella pneumophila subsp. pneumophila	0	0	0	0	0	0	0	0	0
NZ_HG969191.1	38323	Bartonella henselae	2	2	0	0	0	2	0	0	0
NC_014212.1	526227	Meiothermus silvanus DSM 9946	2	2	0	0	0	2	0	0	0
NC_009675.1	404589	Anaeromyxobacter sp. Fw109-5	3	2	0	0	0	2	0	0	0
NC_015571.1	1030843	Porphyromonas gingivalis TDC60	0	0	0	0	0	0	0	0	0
NC_016612.1	1006551	Klebsiella oxytoca KCTC 1686	5	5	0	0	0	5	0	0	0
NC_009440.1	399549	Metallosphaera sedula DSM 5348	4	3	0	0	0	3	0	0	0
NC_012108.1	177437	Desulfobacterium autotrophicum HRM2	5	5	0	0	0	5	0	0	0
NC_012438.1	204536	Sulfurihydrogenibium azorense Az-Fu1	4	3	0	0	0	3	0	0	0
NZ_CP009925.1	813	Chlamydia trachomatis	0	0	0	0	0	0	0	0	0
NZ_CP012252.1	244366	Klebsiella variicola	3	3	0	0	0	0	3	0	0
NC_000961.1	70601	Pyrococcus horikoshii OT3	0	0	0	0	0	0	0	0	0
NZ_CP004388.1	1123366	Thalassospira xiamenensis M-5 = DSM 17429	3	3	0	0	0	3	0	0	0
NZ_AP014680.1	1193095	Lactobacillus hokkaidonensis	1	1	0	0	0	1	0	0	0
NC_021834.1	1338035	Campylobacter jejuni 32488	1	1	0	0	0	1	0	0	0
NZ_CP007581.1	90371	Salmonella enterica subsp. enterica serovar Typhimurium	2	2	0	0	0	2	0	0	0
NZ_CP011254.1	47917	Serratia fonticola	2	2	0	0	0	2	0	0	0
NC_020966.1	1071753	Chlamydia trachomatis A/363	0	0	0	0	0	0	0	0	0
NZ_CP008804.1	480	Moraxella catarrhalis	1	1	0	0	0	1	0	0	0
NC_011884.1	395961	Cyanothece sp. PCC 7425	3	3	0	0	0	3	0	0	0
NC_012962.1	291112	Photorhabdus asymbiotica	4	4	0	0	0	4	0	0	0
NC_019745.1	1173026	Gloeocapsa sp. PCC 7428	4	4	0	0	0	4	0	0	0
NZ_CP007763.1	224914	Brucella melitensis bv. 1 str. 16M	4	4	0	0	0	0	4	0	0
NZ_CP010432.1	1579	Lactobacillus acidophilus	0	0	0	0	0	0	0	0	0
NC_008369.1	393011	Francisella tularensis subsp. holarctica OSU18	0	0	0	0	0	0	0	0	0
NC_012687.1	672161	Chlamydia trachomatis B/TZ1A828/OT	0	0	0	0	0	0	0	0	0
NZ_CP007032.1	871968	Desulfitobacterium metallireducens DSM 15288	2	2	0	0	0	2	0	0	0
NC_020291.1	931276	Clostridium saccharoperbutylacetonicum N1-4(HMT)	2	2	0	0	0	2	0	0	0
NC_021900.1	1076934	Streptococcus lutetiensis 033	1	1	0	0	0	1	0	0	0
NZ_CP009693.1	119857	Francisella tularensis subsp. holarctica	3	2	0	0	0	1	1	0	0
NC_015856.1	1005048	Collimonas fungivorans Ter331	4	4	0	0	0	3	1	0	0
NC_013418.2	600809	Blattabacterium sp. (Periplaneta americana) str. BPLAN	1	1	0	0	0	1	0	0	0
NC_020453.1	1245469	Bradyrhizobium oligotrophicum S58	5	4	0	0	0	4	0	0	0
NZ_CP012022.1	1719	Corynebacterium pseudotuberculosis	2	2	0	0	0	2	0	0	0
NC_021726.1	1096995	Acinetobacter baumannii BJAB07104	1	1	0	0	0	1	0	0	0
NZ_CP009101.1	1773	Mycobacterium tuberculosis	4	4	0	0	0	0	4	0	0
NC_009512.1	351746	Pseudomonas putida F1	3	3	0	0	0	3	0	0	0
NZ_CP007563.1	1163752	Candidatus Portiera aleyrodidarum MED (Bemisia tabaci)	0	0	0	0	0	0	0	0	0
NZ_CP007332.1	1412570	Salmonella enterica subsp. enterica serovar Enteritidis str. EC20120916	4	3	0	0	0	3	0	0	0
NZ_CP009753.1	1133671	Francisella tularensis subsp. tularensis WY-00W4114	3	3	0	0	0	3	0	0	0
NZ_CP011955.1	129394	Xanthomonas oryzae pv. oryzicola	1	1	0	0	0	1	0	0	0
NZ_CP009559.1	54388	Salmonella enterica subsp. enterica serovar Paratyphi A	5	4	0	0	0	4	0	0	0
NC_018485.1	187303	Methylocystis sp. SC2	3	3	0	0	0	3	0	0	0
NZ_AFRZ01000001.1	929558	Sulfurimonas gotlandica GD1	1	1	0	0	0	1	0	0	0
NC_016914.1	1105100	Rickettsia rickettsii str. Hino	0	0	0	0	0	0	0	0	0
NC_015676.1	679901	Methanosalsum zhilinae DSM 4017	3	3	0	0	0	3	0	0	0
NC_002946.2	242231	Neisseria gonorrhoeae FA 1090	2	2	0	0	0	1	1	0	0
NZ_AGIY02000001.1	882090	Methanolinea tarda NOBI-1	4	4	0	0	0	4	0	0	0
NZ_CP012171.1	1690248	Arthrobacter sp. LS16	1	1	0	0	0	1	0	0	0
NZ_CP009091.1	149539	Salmonella enterica subsp. enterica serovar Enteritidis	0	0	0	0	0	0	0	0	0
NC_009725.1	326423	Bacillus methylotrophicus FZB42	4	3	0	0	0	1	2	0	0
NZ_CP011347.1	492670	Bacillus methylotrophicus	1	1	0	0	0	0	1	0	0
NC_022441.1	1234369	Chlamydia pecorum P787	1	1	0	0	0	1	0	0	0
NC_022198.1	1348662	Corynebacterium argentoratense DSM 44202	0	0	0	0	0	0	0	0	0
NC_012982.1	582402	Hirschia baltica ATCC 49814	3	3	0	0	0	3	0	0	0
NC_017309.1	718251	Edwardsiella tarda FL6-60	1	1	0	0	0	0	1	0	0
NC_017138.1	1006007	Bacillus megaterium WSH-002	4	4	0	0	0	4	0	0	0
NZ_CP010812.1	666	Vibrio cholerae	1	1	0	0	0	1	0	0	0
NC_013887.1	644281	Methanocaldococcus sp. FS406-22	0	0	0	0	0	0	0	0	0
NC_016605.1	701521	Pediococcus claussenii ATCC BAA-344	1	1	0	0	0	1	0	0	0
NC_014837.1	592316	Pantoea sp. At-9b	4	4	0	0	0	4	0	0	0
NC_010681.1	398527	Burkholderia phytofirmans PsJN	1	1	0	0	0	1	0	0	0
NC_012686.1	580049	Chlamydia trachomatis B/Jali20/OT	2	2	0	0	0	2	0	0	0
NZ_CP010361.1	573	Klebsiella pneumoniae	6	6	0	0	0	5	1	0	0
NZ_CP007027.1	1437856	Mycobacterium tuberculosis H37RvSiena	2	2	0	0	0	0	2	0	0
NC_022222.1	1392476	Staphylococcus aureus subsp. aureus 6850	1	1	0	0	0	1	0	0	0
NZ_CP010804.1	34021	Candidatus Liberibacter asiaticus	0	0	0	0	0	0	0	0	0
NZ_CP011931.1	214675	Leptospira interrogans serovar Manilae	1	1	0	0	0	1	0	0	0
NC_017254.1	713600	Buchnera aphidicola str. JF98 (Acyrthosiphon pisum)	2	2	0	0	0	2	0	0	0
NC_013422.1	555778	Halothiobacillus neapolitanus c2	0	0	0	0	0	0	0	0	0
NZ_CP006704.1	1392005	Comamonas testosteroni TK102	5	5	0	0	0	5	0	0	0
NC_009937.1	438753	Azorhizobium caulinodans ORS 571	1	1	0	0	0	1	0	0	0
NC_003030.1	272562	Clostridium acetobutylicum ATCC 824	2	2	0	0	0	2	0	0	0
NZ_CP008808.1	1240980	Campylobacter fetus subsp. fetus 04/554	0	0	0	0	0	0	0	0	0
NC_007946.1	364106	Escherichia coli UTI89	2	2	0	0	0	2	0	0	0
NZ_AP014595.1	931202	Candidatus Liberibacter asiaticus str. Ishi-1	0	0	0	0	0	0	0	0	0
NZ_CP006568.1	2342	Candidatus Sodalis pierantonius str. SOPE	4	3	0	0	0	3	0	0	0
NZ_CP007145.1	1227739	Hymenobacter swuensis DY53	5	5	0	0	0	5	0	0	0
NC_013851.1	572477	Allochromatium vinosum DSM 180	2	2	0	0	0	2	0	0	0
NC_013854.1	137722	Azospirillum sp. B510	6	6	0	0	0	6	0	0	0
NZ_ABCY02000001.1	445987	Borrelia valaisiana VS116	0	0	0	0	0	0	0	0	0
NC_011205.1	439851	Salmonella enterica subsp. enterica serovar Dublin str. CT_02021853	4	4	0	0	0	4	0	0	0
NC_015320.1	693661	Archaeoglobus veneficus SNP6	1	1	0	0	0	1	0	0	0
NZ_CP010571.1	813	Chlamydia trachomatis	0	0	0	0	0	0	0	0	0
NZ_CP009300.1	1454382	Bacillus cereus D17	3	2	0	0	0	1	1	0	0
NZ_CP007245.1	1412470	Salmonella enterica subsp. enterica serovar Enteritidis str. EC20120008	5	5	0	0	0	5	0	0	0
NC_021084.1	1236908	Wolbachia endosymbiont of Drosophila simulans wNo	0	0	0	0	0	0	0	0	0
NC_012488.1	568819	Listeria monocytogenes serotype 4b str. CLIP 80459	2	2	0	0	0	2	0	0	0
NZ_CP011770.1	1348774	Croceicoccus naphthovorans	2	2	0	0	0	2	0	0	0
NC_010816.1	205913	Bifidobacterium longum DJO10A	1	1	0	0	0	1	0	0	0
NC_006834.1	291331	Xanthomonas oryzae pv. oryzae KACC 10331	2	2	0	0	0	2	0	0	0
NC_020888.1	1298593	Thalassolituus oleivorans MIL-1	5	5	0	0	0	5	0	0	0
NZ_CP006965.1	582419	Thermococcus paralvinellae	1	1	0	0	0	1	0	0	0
NC_016856.1	588858	Salmonella enterica subsp. enterica serovar Typhimurium str. 14028S	3	2	0	0	0	2	0	0	0
NZ_CP008929.1	573	Klebsiella pneumoniae	4	1	2	0	0	1	2	0	0
NC_008347.1	394221	Maricaulis maris MCS10	1	1	0	0	0	1	0	0	0
NC_011593.1	391904	Bifidobacterium longum subsp. infantis ATCC 15697 = JCM 1222 = DSM 20088	1	1	0	0	0	1	0	0	0
NC_018720.1	1147128	Bifidobacterium asteroides PRL2011	2	2	0	0	0	2	0	0	0
NC_016641.1	985665	Paenibacillus terrae HPL-003	4	4	0	0	0	4	0	0	0
NZ_CP007699.1	1403539	Streptomyces lydicus A02	4	3	0	0	0	3	0	0	0
NZ_CP011790.1	149539	Salmonella enterica subsp. enterica serovar Enteritidis	7	7	0	0	0	7	0	0	0
NZ_CP011394.1	696867	Salmonella enterica subsp. enterica serovar Enteritidis str. 18569	3	3	0	0	0	3	0	0	0
NC_014370.1	553174	Prevotella melaninogenica ATCC 25845	3	3	0	0	0	3	0	0	0
NZ_CP009598.1	1449979	Bacillus anthracis str. V770-NP-1R	6	6	0	0	0	1	5	0	0
NC_018609.1	1228997	Riemerella anatipestifer RA-CH-1	3	3	0	0	0	3	0	0	0
NC_016795.1	1104320	Brucella abortus A13334	1	1	0	0	0	0	1	0	0
NC_016627.1	720554	[Clostridium] clariflavum DSM 19732	1	1	0	0	0	1	0	0	0
NZ_AP014573.1	1445606	Mycobacterium tuberculosis str. Kurono	1	1	0	0	0	0	1	0	0
NC_017056.1	1105096	Rickettsia prowazekii str. BuV67-CWPP	0	0	0	0	0	0	0	0	0
NC_010471.1	349519	Leuconostoc citreum KM20	0	0	0	0	0	0	0	0	0
NZ_CP011371.1	413882	[Polyangium] brachysporum	0	0	0	0	0	0	0	0	0
NC_017526.1	1081095	Legionella pneumophila subsp. pneumophila str. Hextuple_3a	2	2	0	0	0	2	0	0	0
NZ_CP009043.1	1244531	Campylobacter iguaniorum	1	1	0	0	0	1	0	0	0
NC_017846.1	694569	Aggregatibacter actinomycetemcomitans D7S-1	2	2	0	0	0	2	0	0	0
NC_021284.1	1276229	Spiroplasma syrphidicola EA-1	0	0	0	0	0	0	0	0	0
NC_012892.2	469008	Escherichia coli BL21(DE3)	5	3	2	0	0	3	2	0	0
NC_012588.1	427317	Sulfolobus islandicus M.14.25	2	2	0	0	0	2	0	0	0
NC_021880.1	1173064	Anaplasma phagocytophilum str. JM	0	0	0	0	0	0	0	0	0
NC_014217.1	639283	Starkeya novella DSM 506	3	3	0	0	0	3	0	0	0
NC_017436.1	759364	Chlamydia trachomatis D-LC	1	1	0	0	0	1	0	0	0
NZ_AGTD01000001.1	1050617	Escherichia coli UMNF18	4	0	4	0	0	0	4	0	0
NZ_CP010778.1	1452	Bacillus atrophaeus	5	5	0	0	0	5	0	0	0
NC_014225.1	716544	Waddlia chondrophila WSU 86-1044	3	3	0	0	0	3	0	0	0
NZ_CP009968.1	288681	Bacillus cereus E33L	2	2	0	0	0	1	1	0	0
NC_016010.1	981368	Xanthomonas axonopodis pv. citrumelo F1	5	5	0	0	0	3	2	0	0
NC_013062.1	531844	Flavobacteriaceae bacterium 3519-10	0	0	0	0	0	0	0	0	0
NC_013892.1	406818	Xenorhabdus bovienii SS-2004	0	0	0	0	0	0	0	0	0
NC_021004.1	869312	Streptococcus pneumoniae SPN033038	1	1	0	0	0	1	0	0	0
NZ_CP006820.1	1382920	Helicobacter pylori oki102	0	0	0	0	0	0	0	0	0
NC_021721.1	1318635	Lactobacillus casei LOCK919	2	2	0	0	0	0	2	0	0
NC_011420.2	414684	Rhodospirillum centenum SW	1	1	0	0	0	1	0	0	0
NC_019896.1	1192196	Bacillus subtilis subsp. subtilis str. BSP1	1	1	0	0	0	1	0	0	0
NC_017374.1	985081	Helicobacter pylori 2017	0	0	0	0	0	0	0	0	0
NC_002516.2	208964	Pseudomonas aeruginosa PAO1	7	7	0	0	0	7	0	0	0
NC_015673.1	662755	Corynebacterium resistens DSM 45100	1	1	0	0	0	1	0	0	0
NC_008782.1	232721	Acidovorax sp. JS42	4	4	0	0	0	4	0	0	0
NZ_CP012300.1	72407	Klebsiella pneumoniae subsp. pneumoniae	2	2	0	0	0	0	2	0	0
NZ_CP009448.1	562971	Achromobacter xylosoxidans C54	2	2	0	0	0	2	0	0	0
NC_000907.1	71421	Haemophilus influenzae Rd KW20	0	0	0	0	0	0	0	0	0
NZ_CP010049.1	1505597	Blochmannia endosymbiont of Camponotus (Colobopsis) obliquus	0	0	0	0	0	0	0	0	0
NZ_AP014648.1	1384459	Methyloceanibacter caenitepidi	3	3	0	0	0	3	0	0	0
NC_021237.1	1124983	Pseudomonas protegens CHA0	2	2	0	0	0	2	0	0	0
NZ_CP009976.1	1348584	Cellulophaga baltica 18	2	2	0	0	0	2	0	0	0
NC_009348.1	382245	Aeromonas salmonicida subsp. salmonicida A449	1	1	0	0	0	1	0	0	0
NC_016943.1	1146883	Blastococcus saxobsidens DD2	4	4	0	0	0	4	0	0	0
NC_017042.1	1105113	Rickettsia rhipicephali str. 3-7-female6-CWPP	0	0	0	0	0	0	0	0	0
NC_022600.1	1183438	Gloeobacter kilaueensis JS1	6	6	0	0	0	6	0	0	0
NC_013203.1	521095	Atopobium parvulum DSM 20469	0	0	0	0	0	0	0	0	0
NC_017075.1	983917	Rubrivivax gelatinosus IL144	3	3	0	0	0	3	0	0	0
NC_021353.1	1295009	Candidatus Methanomassiliicoccus intestinalis Issoire-Mx1	3	3	0	0	0	3	0	0	0
NZ_HG004426.1	688354	Campylobacter fetus subsp. venerealis str. 84-112	1	1	0	0	0	1	0	0	0
NZ_CP006908.1	1408283	Clostridium botulinum CDC_1436	3	3	0	0	0	3	0	0	0
NZ_CP011512.1	59893	Paenibacillus peoriae	2	2	0	0	0	1	1	0	0
NZ_CP012126.1	562	Escherichia coli	6	3	3	0	0	3	3	0	0
NC_014408.1	79929	Methanothermobacter marburgensis str. Marburg	0	0	0	0	0	0	0	0	0
NC_007958.1	316057	Rhodopseudomonas palustris BisB5	4	4	0	0	0	4	0	0	0
NZ_ABYG01000001.1	564419	Chlamydia trachomatis 70s	1	1	0	0	0	1	0	0	0
NC_004829.2	710127	Mycoplasma gallisepticum str. R(low)	0	0	0	0	0	0	0	0	0
NC_018642.1	882094	Listeria monocytogenes L312	1	1	0	0	0	1	0	0	0
NC_016012.1	1041504	Candidatus Arthromitus sp. SFB-rat-Yit	1	1	0	0	0	1	0	0	0
NC_014762.1	709032	Sulfuricurvum kujiense DSM 16994	3	3	0	0	0	3	0	0	0
NC_021915.1	1224163	Corynebacterium maris DSM 45190	1	1	0	0	0	1	0	0	0
NC_007292.1	291272	Candidatus Blochmannia pennsylvanicus str. BPEN	0	0	0	0	0	0	0	0	0
NC_013061.1	485917	Pedobacter heparinus DSM 2366	0	0	0	0	0	0	0	0	0
NC_002978.6	163164	Wolbachia endosymbiont of Drosophila melanogaster	0	0	0	0	0	0	0	0	0
NC_011080.1	423368	Salmonella enterica subsp. enterica serovar Newport str. SL254	5	4	0	0	0	4	0	0	0
NC_012563.1	536232	Clostridium botulinum A2 str. Kyoto	2	2	0	0	0	2	0	0	0
NC_020246.1	1028566	Sulfolobus acidocaldarius N8	2	2	0	0	0	2	0	0	0
NZ_CP007329.2	1412466	Salmonella enterica subsp. enterica serovar Enteritidis str. EC20120002	2	2	0	0	0	2	0	0	0
NZ_CP007576.1	1418107	Aeromonas hydrophila pc104A	4	4	0	0	0	4	0	0	0
NC_015057.1	1198114	Granulicella tundricola MP5ACTX9	3	3	0	0	0	3	0	0	0
NC_017061.1	1155777	Bacillus methylotrophicus YAU B9601-Y2	2	2	0	0	0	0	2	0	0
NC_008319.1	64471	Synechococcus sp. CC9311	1	1	0	0	0	1	0	0	0
NC_022794.1	1399115	Exiguobacterium sp. MH3	4	4	0	0	0	4	0	0	0
NC_015434.1	263358	Verrucosispora maris AB-18-032	5	5	0	0	0	5	0	0	0
NC_008148.1	266117	Rubrobacter xylanophilus DSM 9941	5	5	0	0	0	5	0	0	0
NC_011060.1	324925	Pelodictyon phaeoclathratiforme BU-1	2	2	0	0	0	2	0	0	0
NC_013355.1	622759	Zymomonas mobilis subsp. mobilis NCIMB 11163	1	1	0	0	0	1	0	0	0
NZ_LN846980.1	83558	Chlamydia pneumoniae	1	1	0	0	0	1	0	0	0
NC_015730.1	391595	Roseobacter litoralis Och 149	1	1	0	0	0	1	0	0	0
NC_011772.1	405531	Bacillus cereus G9842	2	2	0	0	0	1	1	0	0
NZ_CP006019.1	1343739	Palaeococcus pacificus DY20341	1	1	0	0	0	1	0	0	0
NC_011296.1	289376	Thermodesulfovibrio yellowstonii DSM 11347	2	2	0	0	0	2	0	0	0
NZ_CP006010.1	1337396	Rickettsia rickettsii str. Morgan	1	1	0	0	0	1	0	0	0
NC_009342.1	340322	Corynebacterium glutamicum R	0	0	0	0	0	0	0	0	0
NZ_CM001161.1	992186	Rhodobacter sphaeroides WS8N	1	1	0	0	0	1	0	0	0
NC_008313.1	381666	Ralstonia eutropha H16	3	3	0	0	0	3	0	0	0
NC_004572.3	203267	Tropheryma whipplei str. Twist	0	0	0	0	0	0	0	0	0
NC_020247.1	1028567	Sulfolobus acidocaldarius Ron12/I	3	3	0	0	0	3	0	0	0
NC_022080.4	1345697	Geobacillus sp. JF8	2	2	0	0	0	2	0	0	0
NC_009487.1	359786	Staphylococcus aureus subsp. aureus JH9	3	3	0	0	0	3	0	0	0
NC_004344.2	36870	Wigglesworthia glossinidia endosymbiont of Glossina brevipalpis	0	0	0	0	0	0	0	0	0
NZ_CP007222.1	1454603	Salmonella enterica subsp. enterica serovar Montevideo str. USDA-ARS-USMARC-1903	2	2	0	0	0	2	0	0	0
NZ_CP009608.1	83560	Chlamydia muridarum	1	1	0	0	0	1	0	0	0
NC_012731.1	484021	Klebsiella pneumoniae subsp. pneumoniae NTUH-K2044	4	4	0	0	0	4	0	0	0
NZ_CP012648.1	1302	Streptococcus gordonii	1	1	0	0	0	1	0	0	0
NZ_CP009685.1	511145	Escherichia coli str. K-12 substr. MG1655	5	2	3	0	0	2	3	0	0
NC_011149.1	454166	Salmonella enterica subsp. enterica serovar Agona str. SL483	4	4	0	0	0	4	0	0	0
NC_021355.1	224719	Methanobrevibacter sp. AbM4	1	1	0	0	0	1	0	0	0
NC_009802.1	360104	Campylobacter concisus 13826	1	1	0	0	0	1	0	0	0
NC_004557.1	212717	Clostridium tetani E88	1	1	0	0	0	1	0	0	0
NZ_CP011786.1	1437605	Bifidobacterium actinocoloniiforme DSM 22766	1	1	0	0	0	1	0	0	0
NZ_CP009859.1	562	Escherichia coli	3	2	1	0	0	2	1	0	0
NZ_CP006636.1	1358422	Escherichia coli PCN061	7	2	4	1	0	2	4	1	0
NC_020832.1	1302650	Bacillus subtilis subsp. subtilis str. BAB-1	3	3	0	0	0	1	2	0	0
NC_018508.1	1217737	Bacillus thuringiensis HD-789	5	5	0	0	0	2	3	0	0
NC_019780.1	13035	Dactylococcopsis salina PCC 8305	1	1	0	0	0	1	0	0	0
NC_015733.1	1042876	Pseudomonas putida S16	3	3	0	0	0	0	3	0	0
NZ_CP007242.1	1292358	Bacillus amyloliquefaciens KHG19	1	1	0	0	0	0	1	0	0
NZ_CP012364.1	1698448	Pseudomonadaceae bacterium E1148	0	0	0	0	0	0	0	0	0
NZ_CP009614.1	44454	Mycobacterium avium subsp. avium	5	5	0	0	0	5	0	0	0
NZ_CP007607.1	570416	Bacillus thuringiensis serovar kurstaki str. YBT-1520	4	4	0	0	0	2	2	0	0
NZ_CP012681.1	90371	Salmonella enterica subsp. enterica serovar Typhimurium	3	3	0	0	0	3	0	0	0
NC_017353.1	1034809	Staphylococcus lugdunensis N920143	2	2	0	0	0	2	0	0	0
NZ_CP012332.1	1391653	Vulgatibacter incomptus	2	2	0	0	0	2	0	0	0
NZ_CP007570.1	1311	Streptococcus agalactiae	0	0	0	0	0	0	0	0	0
NZ_CP009961.1	1550241	Thermofilum sp. 1807-2	1	1	0	0	0	1	0	0	0
NC_018267.1	100901	Wolbachia endosymbiont of Onchocerca ochengi	1	1	0	0	0	1	0	0	0
NC_013037.1	471854	Dyadobacter fermentans DSM 18053	3	3	0	0	0	3	0	0	0
NC_002967.9	243275	Treponema denticola ATCC 35405	1	1	0	0	0	1	0	0	0
NZ_CP011396.1	935705	Salmonella enterica subsp. enterica serovar Thompson str. ATCC 8391	2	2	0	0	0	2	0	0	0
NZ_CP004023.1	1249474	Burkholderia pseudomallei MSHR511	4	2	0	0	0	0	2	0	0
NZ_CP009795.1	350701	Burkholderia dolosa AU0158	3	3	0	0	0	0	2	1	0
NZ_CP010803.1	1486262	Martelella endophytica	3	3	0	0	0	3	0	0	0
NZ_AP014510.1	1408160	Thermotoga profunda AZM34c06	1	1	0	0	0	1	0	0	0
NC_004113.1	197221	Thermosynechococcus elongatus BP-1	1	1	0	0	0	1	0	0	0
NC_014537.1	572478	Vulcanisaeta distributa DSM 14429	0	0	0	0	0	0	0	0	0
NZ_CP013021.1	680279	Agarivorans gilvus	4	4	0	0	0	4	0	0	0
NZ_CP011365.1	90371	Salmonella enterica subsp. enterica serovar Typhimurium	2	2	0	0	0	2	0	0	0
NC_011244.1	412418	Borrelia recurrentis A1	2	2	0	0	0	0	2	0	0
NC_016913.1	1105104	Rickettsia rickettsii str. Brazil	0	0	0	0	0	0	0	0	0
NC_018149.1	1197325	Mycoplasma wenyonii str. Massachusetts	0	0	0	0	0	0	0	0	0
NZ_CP009720.1	1428	Bacillus thuringiensis	3	3	0	0	0	0	3	0	0
NC_022665.1	1340847	Streptococcus suis T15	3	3	0	0	0	3	0	0	0
NZ_CP012187.1	1597	Lactobacillus paracasei	3	3	0	0	0	1	2	0	0
NC_005071.1	74547	Prochlorococcus marinus str. MIT 9313	5	5	0	0	0	5	0	0	0
NZ_CP011976.1	1284798	Klebsiella pneumoniae DMC1097	2	2	0	0	0	2	0	0	0
NC_022592.1	1341692	Clostridium autoethanogenum DSM 10061	4	4	0	0	0	2	2	0	0
NZ_CP007155.1	1449976	Kutzneria albida DSM 43870	7	7	0	0	0	7	0	0	0
NZ_CP006714.1	1385941	Bifidobacterium breve NCFB 2258	2	2	0	0	0	2	0	0	0
NZ_CP013219.1	264445	Streptomyces hygroscopicus subsp. limoneus	5	4	0	0	0	4	0	0	0
NZ_CP011070.1	1580092	Candidatus Nitrosopumilus sp. NF5	3	2	0	0	0	2	0	0	0
NC_018585.1	879088	Listeria monocytogenes SLCC2378	3	3	0	0	0	2	1	0	0
NC_017491.1	1088720	Lactobacillus rhamnosus ATCC 8530	0	0	0	0	0	0	0	0	0
NC_012483.1	240015	Acidobacterium capsulatum ATCC 51196	1	1	0	0	0	1	0	0	0
NZ_AP014524.1	1420885	Vibrio cholerae MS6	4	4	0	0	0	4	0	0	0
NZ_CP006741.1	1300227	Bifidobacterium longum subsp. longum GT15	1	1	0	0	0	1	0	0	0
NC_021885.1	669502	Candidatus Profftella armatura	1	0	0	0	0	0	0	0	0
NC_005835.1	262724	Thermus thermophilus HB27	1	1	0	0	0	1	0	0	0
NC_008769.1	410289	Mycobacterium bovis BCG str. Pasteur 1173P2	2	2	0	0	0	0	2	0	0
NC_014158.1	521096	Tsukamurella paurometabola DSM 20162	2	2	0	0	0	2	0	0	0
NZ_CP010028.1	1182571	Deinococcus swuensis	4	4	0	0	0	4	0	0	0
NC_010376.1	334413	Finegoldia magna ATCC 29328	0	0	0	0	0	0	0	0	0
NC_013532.1	574556	Anaplasma centrale str. Israel	3	3	0	0	0	1	2	0	0
NC_014539.1	640512	Burkholderia sp. CCGE1003	2	2	0	0	0	2	0	0	0
NC_019897.1	717605	Thermobacillus composti KWC4	3	3	0	0	0	3	0	0	0
NZ_CP011117.1	294	Pseudomonas fluorescens	7	6	0	0	0	5	1	0	0
NZ_CP011364.1	1578828	Edwardsiella sp. EA181011	1	1	0	0	0	0	1	0	0
NC_010501.1	390235	Pseudomonas putida W619	5	4	0	0	0	4	0	0	0
NC_020059.1	698761	Rhizobium tropici CIAT 899	5	5	0	0	0	5	0	0	0
NZ_CP006632.1	1001989	Escherichia coli PCN033	0	0	0	0	0	0	0	0	0
NC_017186.1	713604	Amycolatopsis mediterranei S699	4	3	0	0	0	3	0	0	0
NC_010002.1	398578	Delftia acidovorans SPH-1	7	6	0	0	0	4	2	0	0
NC_007722.1	314225	Erythrobacter litoralis HTCC2594	2	1	0	0	0	1	0	0	0
NC_018622.1	1218356	Chlamydia psittaci WS/RT/E30	2	2	0	0	0	2	0	0	0
NZ_CP009364.1	1454377	Yersinia frederiksenii Y225	4	4	0	0	0	0	4	0	0
NZ_CP011636.1	571	Klebsiella oxytoca	5	4	0	0	0	4	0	0	0
NZ_CP007663.1	235	Brucella abortus	1	1	0	0	0	0	1	0	0
NC_013714.1	401473	Bifidobacterium dentium Bd1	2	2	0	0	0	2	0	0	0
NC_020537.1	1074919	Staphylococcus aureus subsp. aureus ST228	0	0	0	0	0	0	0	0	0
NC_016791.1	755731	Clostridium sp. BNL1100	4	4	0	0	0	4	0	0	0
NC_002952.2	282458	Staphylococcus aureus subsp. aureus MRSA252	4	4	0	0	0	4	0	0	0
NZ_CP004360.1	1296990	Komagataeibacter xylinus E25	3	3	0	0	0	3	0	0	0
NC_007503.1	246194	Carboxydothermus hydrogenoformans Z-2901	3	3	0	0	0	3	0	0	0
NZ_CP006975.1	1434773	Chlamydia muridarum str. Nigg CM972	0	0	0	0	0	0	0	0	0
NC_011035.1	521006	Neisseria gonorrhoeae NCCP11945	0	0	0	0	0	0	0	0	0
NZ_CP012384.1	53345	Enterococcus durans	1	1	0	0	0	1	0	0	0
NC_012791.1	543728	Variovorax paradoxus S110	2	2	0	0	0	2	0	0	0
NZ_LM995447.1	29343	[Clostridium] cellulosi	4	4	0	0	0	4	0	0	0
NZ_CP011854.1	316	Pseudomonas stutzeri	4	4	0	0	0	4	0	0	0
NZ_CP009798.1	339670	Burkholderia ambifaria AMMD	8	7	1	0	0	7	1	0	0
NZ_CP008941.1	91604	Candidatus Paracaedibacter acanthamoebae	3	3	0	0	0	3	0	0	0
NC_020833.1	1249531	Mannheimia haemolytica USDA-ARS-USMARC-183	2	2	0	0	0	2	0	0	0
NZ_CP008801.1	1435461	Escherichia coli KLY	5	0	5	0	0	0	5	0	0
NC_017456.1	1009464	Gardnerella vaginalis HMP9231	0	0	0	0	0	0	0	0	0
NZ_CP007422.1	1412462	Salmonella enterica subsp. enterica serovar Enteritidis str. EC20090531	2	2	0	0	0	2	0	0	0
NZ_CP004379.1	884204	Burkholderia pseudomallei 1026b	4	4	0	0	0	1	3	0	0
NZ_CP011494.1	330734	Marinobacter psychrophilus	3	3	0	0	0	3	0	0	0
NZ_HG738867.1	1403831	Escherichia coli str. K-12 substr. MC4100	3	1	2	0	0	1	2	0	0
NC_017125.1	634455	Acetobacter pasteurianus IFO 3283-22	2	2	0	0	0	2	0	0	0
NC_014414.1	314260	Parvularcula bermudensis HTCC2503	2	2	0	0	0	2	0	0	0
NZ_CP009407.1	1299325	Mycobacterium abscessus subsp. bolletii 103	1	1	0	0	0	1	0	0	0
NZ_CP010848.1	145458	Rathayibacter toxicus	2	2	0	0	0	2	0	0	0
NC_020307.1	1267753	Salmonella enterica subsp. enterica serovar Javiana str. CFSAN001992	4	4	0	0	0	4	0	0	0
NC_016582.1	749414	Streptomyces bingchenggensis BCW-1	8	7	0	0	0	7	0	0	0
NZ_CP011073.1	817	Bacteroides fragilis	2	2	0	0	0	2	0	0	0
NC_022239.1	862971	Streptococcus anginosus C238	3	3	0	0	0	2	1	0	0
NC_011094.1	439843	Salmonella enterica subsp. enterica serovar Schwarzengrund str. CVM19633	2	2	0	0	0	2	0	0	0
NC_017618.1	945704	Streptococcus suis JS14	2	2	0	0	0	2	0	0	0
NC_015711.1	483219	Myxococcus fulvus HW-1	6	6	0	0	0	5	0	1	0
NZ_CP002882.1	1010835	Mycobacterium tuberculosis BT2	2	2	0	0	0	0	2	0	0
NZ_CP005286.1	1223515	Corynebacterium humireducens NBRC 106098 = DSM 45392	1	1	0	0	0	1	0	0	0
NC_014365.1	644282	Desulfarculus baarsii DSM 2075	3	3	0	0	0	3	0	0	0
NZ_CP012037.1	264	Francisella tularensis subsp. novicida	2	2	0	0	0	2	0	0	0
NC_021717.1	1300256	Alteromonas macleodii str. 'Ionian Sea U7'	2	2	0	0	0	2	0	0	0
NZ_AP012273.1	1076588	Thiolapillus brandeum	1	1	0	0	0	1	0	0	0
NZ_CP010867.1	1311	Streptococcus agalactiae	1	1	0	0	0	1	0	0	0
NC_015734.1	979982	Leuconostoc sp. C2	0	0	0	0	0	0	0	0	0
NC_007350.1	342451	Staphylococcus saprophyticus subsp. saprophyticus ATCC 15305	0	0	0	0	0	0	0	0	0
NC_021831.1	754503	Mycoplasma hyopneumoniae 7422	1	1	0	0	0	1	0	0	0
NZ_CP008889.1	1274	Dermacoccus nishinomiyaensis	3	3	0	0	0	3	0	0	0
NZ_CP007593.1	1313	Streptococcus pneumoniae	4	4	0	0	0	2	2	0	0
NC_001263.1	243230	Deinococcus radiodurans R1	2	1	0	0	0	1	0	0	0
NC_021825.1	1639	Listeria monocytogenes	0	0	0	0	0	0	0	0	0
NC_014103.1	592022	Bacillus megaterium DSM 319	4	4	0	0	0	4	0	0	0
NZ_CP007778.1	1453988	Campylobacter lari RM16712	0	0	0	0	0	0	0	0	0
NC_012416.1	66084	Wolbachia sp. wRi	1	1	0	0	0	0	1	0	0
NZ_LK021130.1	55601	Vibrio anguillarum	0	0	0	0	0	0	0	0	0
NZ_CP009281.1	1536770	Paenibacillus sp. FSL R5-0345	7	7	0	0	0	7	0	0	0
NC_014166.1	572480	Arcobacter nitrofigilis DSM 7299	1	1	0	0	0	1	0	0	0
NC_023063.1	1423892	Ehrlichia muris AS145	0	0	0	0	0	0	0	0	0
NZ_CP010050.1	1360	Lactococcus lactis subsp. lactis	2	2	0	0	0	2	0	0	0
NZ_CP009242.1	1639	Listeria monocytogenes	3	3	0	0	0	3	0	0	0
NZ_CP009280.1	1536769	Paenibacillus sp. FSL P4-0081	7	6	0	0	0	6	0	0	0
NC_017568.1	984892	Staphylococcus pseudintermedius ED99	3	3	0	0	0	3	0	0	0
NC_015574.1	868131	Methanobacterium paludis	2	2	0	0	0	2	0	0	0
NZ_CP009610.1	727	Haemophilus influenzae	1	1	0	0	0	1	0	0	0
NZ_CP006851.1	1408176	Campylobacter jejuni subsp. jejuni F38011	0	0	0	0	0	0	0	0	0
NC_018608.1	1229492	Staphylococcus aureus 08BA02176	0	0	0	0	0	0	0	0	0
NZ_CP007446.1	1196094	Snodgrassella alvi wkB2	1	1	0	0	0	1	0	0	0
NZ_CP009838.1	630	Yersinia enterocolitica	5	5	0	0	0	5	0	0	0
NC_006512.1	283942	Idiomarina loihiensis L2TR	3	3	0	0	0	3	0	0	0
NC_002662.1	272623	Lactococcus lactis subsp. lactis Il1403	0	0	0	0	0	0	0	0	0
NC_017068.1	927704	Selenomonas ruminantium subsp. lactilytica TAM6421	3	3	0	0	0	3	0	0	0
NC_017039.1	1080230	Synechocystis sp. PCC 6803 substr. PCC-P	3	3	0	0	0	3	0	0	0
NZ_CP009514.1	1434113	Methanosarcina mazei C16	2	2	0	0	0	2	0	0	0
NZ_LM997412.1	875453	Peptoniphilus sp. 1-1	0	0	0	0	0	0	0	0	0
NZ_CP009436.1	28110	Francisella philomiragia	1	1	0	0	0	1	0	0	0
NC_016023.1	345219	Bacillus coagulans 36D1	2	2	0	0	0	2	0	0	0
NZ_CP008922.1	1719	Corynebacterium pseudotuberculosis	1	1	0	0	0	1	0	0	0
NC_017248.1	1029825	Brucella melitensis NI	0	0	0	0	0	0	0	0	0
NZ_CP010975.1	914150	Kangiella geojedonensis	3	3	0	0	0	3	0	0	0
NC_000913.3	511145	Escherichia coli str. K-12 substr. MG1655	1	0	1	0	0	0	1	0	0
NZ_CP008834.1	28450	Burkholderia pseudomallei	5	4	0	0	0	0	4	0	0
NC_012472.1	572264	Bacillus cereus 03BB102	3	3	0	0	0	0	3	0	0
NC_020419.1	471821	uncultured Termite group 1 bacterium phylotype Rs-D17	0	0	0	0	0	0	0	0	0
NC_017581.1	1051074	Streptococcus thermophilus JIM 8232	0	0	0	0	0	0	0	0	0
NC_015315.1	999630	Thermoproteus uzoniensis 768-20	0	0	0	0	0	0	0	0	0
NC_003912.7	195099	Campylobacter jejuni RM1221	2	2	0	0	0	2	0	0	0
NC_017121.1	634454	Acetobacter pasteurianus IFO 3283-07	0	0	0	0	0	0	0	0	0
NZ_CP012687.1	305	Ralstonia solanacearum	3	3	0	0	0	3	0	0	0
NC_015145.1	930171	Arthrobacter phenanthrenivorans Sphe3	0	0	0	0	0	0	0	0	0
NZ_CP009850.1	550	Enterobacter cloacae	4	4	0	0	0	4	0	0	0
NZ_CP010438.1	83333	Escherichia coli K-12	3	0	3	0	0	0	3	0	0
NC_014804.1	391623	Thermococcus barophilus MP	3	3	0	0	0	3	0	0	0
NZ_CP011447.1	520	Bordetella pertussis	1	1	0	0	0	0	1	0	0
NZ_CP000574.1	427140	Leuconostoc mesenteroides KFRI-MG	3	3	0	0	0	3	0	0	0
NC_021026.1	869306	Streptococcus pneumoniae SPN994038	4	4	0	0	0	3	0	1	0
NC_018623.1	1218357	Chlamydia psittaci M56	0	0	0	0	0	0	0	0	0
NZ_AP012327.1	1150460	Bifidobacterium kashiwanohense JCM 15439 = DSM 21854	3	3	0	0	0	1	2	0	0
NC_016749.1	1116231	Streptococcus macedonicus ACA-DC 198	1	1	0	0	0	1	0	0	0
NC_017366.1	102608	Helicobacter pylori F32	2	2	0	0	0	2	0	0	0
NC_017534.1	909952	Propionibacterium acnes 266	0	0	0	0	0	0	0	0	0
NC_017960.1	333849	Enterococcus faecium DO	1	1	0	0	0	1	0	0	0
NC_013523.1	479434	Sphaerobacter thermophilus DSM 20745	4	4	0	0	0	4	0	0	0
NZ_CP007521.1	2113	Mycoplasma californicum	1	0	0	0	0	0	0	0	0
NC_010321.1	340099	Thermoanaerobacter pseudethanolicus ATCC 33223	1	0	1	0	0	0	1	0	0
NC_007086.1	314565	Xanthomonas campestris pv. campestris str. 8004	2	2	0	0	0	2	0	0	0
NC_010730.1	436114	Sulfurihydrogenibium sp. YO3AOP1	0	0	0	0	0	0	0	0	0
NC_006300.1	221988	Mannheimia succiniciproducens MBEL55E	0	0	0	0	0	0	0	0	0
NZ_CP007501.1	576611	Polynucleobacter necessarius subsp. asymbioticus	0	0	0	0	0	0	0	0	0
NC_015875.1	1054460	Streptococcus pseudopneumoniae IS7493	1	1	0	0	0	0	1	0	0
NC_014323.1	757424	Herbaspirillum seropedicae SmR1	3	3	0	0	0	3	0	0	0
NC_017274.1	555311	Sulfolobus solfataricus 98/2	4	4	0	0	0	4	0	0	0
NZ_CP007026.1	1410606	Candidatus Nitrosopelagicus brevis	0	0	0	0	0	0	0	0	0
NZ_CP009165.1	1439855	Burkholderia pseudomallei A79A	4	4	0	0	0	1	1	2	0
NC_022443.1	1194085	Staphylococcus aureus subsp. aureus SA40	0	0	0	0	0	0	0	0	0
NC_015318.1	760142	Hippea maritima DSM 10411	1	1	0	0	0	1	0	0	0
NC_021670.1	1321369	Staphylococcus aureus Bmb9393	5	5	0	0	0	5	0	0	0
NC_013530.1	446471	Xylanimonas cellulosilytica DSM 15894	5	4	0	0	0	4	0	0	0
NC_013132.1	485918	Chitinophaga pinensis DSM 2588	6	6	0	0	0	6	0	0	0
NZ_CP009361.1	46170	Staphylococcus aureus subsp. aureus	0	0	0	0	0	0	0	0	0
NZ_CP008706.1	470	Acinetobacter baumannii	4	4	0	0	0	4	0	0	0
NZ_CP007215.1	1235834	Kosakonia sacchari SP1	4	3	0	0	0	3	0	0	0
NC_007517.1	269799	Geobacter metallireducens GS-15	1	1	0	0	0	1	0	0	0
NZ_CP012120.1	46170	Staphylococcus aureus subsp. aureus	1	1	0	0	0	1	0	0	0
NZ_CP009762.1	1295	Staphylococcus schleiferi	2	2	0	0	0	2	0	0	0
NZ_CP007060.1	751944	Halobacterium sp. DL1	4	3	0	0	0	3	0	0	0
NC_010473.1	316385	Escherichia coli str. K-12 substr. DH10B	2	0	2	0	0	0	2	0	0
NC_017546.1	393126	Listeria monocytogenes FSL R2-561	2	2	0	0	0	2	0	0	0
NC_008554.1	335543	Syntrophobacter fumaroxidans MPOB	3	3	0	0	0	3	0	0	0
NC_012997.1	377629	Teredinibacter turnerae T7901	3	3	0	0	0	3	0	0	0
NC_008526.1	321967	Lactobacillus casei ATCC 334	3	3	0	0	0	0	3	0	0
NC_018747.1	1234596	Borrelia garinii NMJW1	1	1	0	0	0	0	1	0	0
NC_011274.1	550538	Salmonella enterica subsp. enterica serovar Gallinarum str. 287/91	3	3	0	0	0	3	0	0	0
NZ_CP007161.1	403957	Virgibacillus sp. SK37	3	3	0	0	0	3	0	0	0
NZ_CP011301.1	292	Burkholderia cepacia	5	4	0	0	0	0	4	0	0
NC_014011.1	572547	Aminobacterium colombiense DSM 12261	0	0	0	0	0	0	0	0	0
NC_015567.1	768492	Serratia plymuthica AS9	6	6	0	0	0	0	6	0	0
NC_006814.3	272621	Lactobacillus acidophilus NCFM	0	0	0	0	0	0	0	0	0
NC_022130.1	1352356	Helicobacter pylori SouthAfrica20	4	4	0	0	0	3	0	1	0
NC_013522.1	525903	Thermanaerovibrio acidaminovorans DSM 6589	3	3	0	0	0	3	0	0	0
NC_015725.1	956483	Mycoplasma bovis Hubei-1	0	0	0	0	0	0	0	0	0
NZ_HG938370.1	1055524	Burkholderia cenocepacia H111	7	7	0	0	0	3	4	0	0
NC_020829.1	1294143	Pseudomonas denitrificans ATCC 13867	4	4	0	0	0	4	0	0	0
NZ_CP011096.1	1267001	Mycoplasma synoviae ATCC 25204	1	1	0	0	0	1	0	0	0
NC_019960.1	908937	Prevotella dentalis DSM 3688	1	1	0	0	0	1	0	0	0
NC_017538.1	1031710	Oligotropha carboxidovorans OM4	1	1	0	0	0	1	0	0	0
NC_018518.1	568706	Bordetella pertussis 18323	3	3	0	0	0	0	3	0	0
NC_009445.1	114615	Bradyrhizobium sp. ORS 278	4	4	0	0	0	4	0	0	0
NC_021177.1	1303692	Streptomyces fulvissimus DSM 40593	5	5	0	0	0	5	0	0	0
NZ_CP009455.1	157783	Pseudomonas cremoricolorata	4	3	0	0	0	3	0	0	0
NZ_HG322950.1	1301098	Pseudomonas knackmussii B13	0	0	0	0	0	0	0	0	0
NC_008532.1	322159	Streptococcus thermophilus LMD-9	2	2	0	0	0	2	0	0	0
NC_014761.1	670487	Oceanithermus profundus DSM 14977	2	2	0	0	0	2	0	0	0
NC_016621.1	1075399	Blattabacterium sp. (Cryptocercus punctulatus) str. Cpu	0	0	0	0	0	0	0	0	0
NZ_CP010852.1	1392	Bacillus anthracis	3	3	0	0	0	1	2	0	0
NZ_CP009086.1	149539	Salmonella enterica subsp. enterica serovar Enteritidis	2	2	0	0	0	2	0	0	0
NC_017473.1	999378	Lactobacillus casei LC2W	2	2	0	0	0	0	2	0	0
NC_009831.1	425104	Shewanella sediminis HAW-EB3	3	3	0	0	0	3	0	0	0
NZ_CP010820.1	28031	Lysinibacillus fusiformis	1	1	0	0	0	1	0	0	0
NZ_CP010434.1	96241	Bacillus subtilis subsp. spizizenii	3	3	0	0	0	3	0	0	0
NZ_HG813249.1	1288295	Listeria monocytogenes 6179	1	1	0	0	0	1	0	0	0
NZ_CP011346.1	492670	Bacillus methylotrophicus	5	5	0	0	0	1	4	0	0
NC_010163.1	441768	Acholeplasma laidlawii PG-8A	0	0	0	0	0	0	0	0	0
NC_018586.1	879089	Listeria monocytogenes SLCC2540	2	2	0	0	0	2	0	0	0
NC_015953.1	862751	Streptomyces sp. SirexAA-E	8	8	0	0	0	8	0	0	0
NZ_CP006953.1	1434215	Mannheimia varigena USDA-ARS-USMARC-1388	4	3	0	0	0	3	0	0	0
NC_021739.1	1311760	Mannheimia haemolytica D174	2	2	0	0	0	2	0	0	0
NZ_ABYF01000001.1	564418	Chlamydia trachomatis 70	0	0	0	0	0	0	0	0	0
NC_020546.1	1254439	Bifidobacterium thermophilum RBL67	1	1	0	0	0	1	0	0	0
NC_008149.1	377628	Yersinia pestis Nepal516	6	6	0	0	0	1	4	1	0
NC_014727.1	767455	Lactobacillus delbrueckii subsp. bulgaricus ND02	3	2	0	0	0	2	0	0	0
NC_017517.1	935588	Neisseria meningitidis M01-240355	0	0	0	0	0	0	0	0	0
NC_009785.1	467705	Streptococcus gordonii str. Challis substr. CH1	1	1	0	0	0	1	0	0	0
NC_010084.1	395019	Burkholderia multivorans ATCC 17616	3	3	0	0	0	3	0	0	0
NC_021283.1	1116211	Mycoplasma hyopneumoniae 168-L	2	1	0	0	0	1	0	0	0
NC_019905.1	1215088	Pseudomonas putida HB3267	3	3	0	0	0	2	1	0	0
NC_006156.1	290434	Borrelia bavariensis PBi	1	1	0	0	0	0	1	0	0
NC_020519.1	1204414	Corynebacterium glutamicum K051	3	3	0	0	0	1	2	0	0
NC_007644.1	264732	Moorella thermoacetica ATCC 39073	2	2	0	0	0	2	0	0	0
NC_010465.1	502800	Yersinia pseudotuberculosis YPIII	3	3	0	0	0	0	3	0	0
NZ_CP009494.1	246196	Mycobacterium smegmatis str. MC2 155	7	7	0	0	0	7	0	0	0
NZ_CP012868.1	511145	Escherichia coli str. K-12 substr. MG1655	1	0	1	0	0	0	1	0	0
NZ_CP011386.1	1587	Lactobacillus helveticus	0	0	0	0	0	0	0	0	0
NZ_CP011401.1	520	Bordetella pertussis	2	2	0	0	0	0	2	0	0
NZ_CP007221.1	129394	Xanthomonas oryzae pv. oryzicola	3	3	0	0	0	3	0	0	0
NC_010125.1	272568	Gluconacetobacter diazotrophicus PA1 5	3	3	0	0	0	3	0	0	0
NZ_CP012837.1	1719	Corynebacterium pseudotuberculosis	2	2	0	0	0	2	0	0	0
NC_021194.1	1310115	Mycobacterium tuberculosis EAI5/NITR206	3	3	0	0	0	0	3	0	0
NZ_AP013354.1	1391726	Helicobacter pylori 26695-1	0	0	0	0	0	0	0	0	0
NC_007984.1	374463	Baumannia cicadellinicola str. Hc (Homalodisca coagulata)	0	0	0	0	0	0	0	0	0
NC_017367.1	866346	Helicobacter pylori F57	1	1	0	0	0	1	0	0	0
NC_014960.1	926569	Anaerolinea thermophila UNI-1	2	2	0	0	0	2	0	0	0
NC_021890.1	907269	Chlamydia trachomatis RC-F(s)/342	0	0	0	0	0	0	0	0	0
NC_017322.1	698936	Sinorhizobium meliloti BL225C	3	3	0	0	0	3	0	0	0
NZ_CP007473.1	1249651	Ehrlichia chaffeensis str. Heartland	1	1	0	0	0	1	0	0	0
NC_010364.1	478009	Halobacterium salinarum R1	1	1	0	0	0	1	0	0	0
NZ_CP011339.1	1638788	Microcystis panniformis FACHB-1757	2	2	0	0	0	0	2	0	0
NC_017384.1	759362	Ketogulonicigenium vulgare WSH-001	2	2	0	0	0	2	0	0	0
NC_017044.1	1105108	Rickettsia parkeri str. Portsmouth	3	3	0	0	0	0	1	1	1
NC_003911.12	246200	Ruegeria pomeroyi DSS-3	4	4	0	0	0	4	0	0	0
NZ_CP007719.1	520487	Brucella suis bv. 3 str. 686	3	3	0	0	0	0	3	0	0
NZ_CP011966.1	1428454	Clostridium pasteurianum NRRL B-598	3	3	0	0	0	2	1	0	0
NC_016941.1	985002	Staphylococcus argenteus	0	0	0	0	0	0	0	0	0
NZ_CP007523.1	1454642	Salmonella enterica subsp. enterica serovar Typhimurium str. CDC 2011K-0870	2	1	1	0	0	1	1	0	0
NZ_CP011444.1	520	Bordetella pertussis	2	2	0	0	0	1	1	0	0
NZ_LK936442.1	28450	Burkholderia pseudomallei	2	1	0	0	0	0	1	0	0
NZ_CP006829.1	1208320	Thalassolituus oleivorans R6-15	1	1	0	0	0	1	0	0	0
NZ_CP007670.1	1280	Staphylococcus aureus	1	1	0	0	0	1	0	0	0
NC_013198.1	568703	Lactobacillus rhamnosus GG	3	3	0	0	0	3	0	0	0
NC_021235.1	767453	Lactobacillus fermentum F-6	0	0	0	0	0	0	0	0	0
NC_021352.1	1232383	Corynebacterium glutamicum SCgG2	2	2	0	0	0	2	0	0	0
NC_021172.1	670307	Hyphomicrobium denitrificans 1NES1	2	2	0	0	0	2	0	0	0
NZ_CP009470.1	1295	Staphylococcus schleiferi	3	3	0	0	0	3	0	0	0
NZ_CP006762.1	1345704	Yersinia pestis 1413	2	2	0	0	0	0	2	0	0
NC_017440.1	707187	Chlamydia trachomatis G/11074	0	0	0	0	0	0	0	0	0
NZ_CP009422.1	487	Neisseria meningitidis	0	0	0	0	0	0	0	0	0
NC_003197.1	99287	Salmonella enterica subsp. enterica serovar Typhimurium str. LT2	3	2	0	0	0	2	0	0	0
NC_017161.1	608538	Hydrogenobacter thermophilus TK-6	1	1	0	0	0	1	0	0	0
NC_011766.1	490899	Desulfurococcus kamchatkensis 1221n	0	0	0	0	0	0	0	0	0
NC_014147.1	1236608	Moraxella catarrhalis BBH18	1	1	0	0	0	1	0	0	0
NC_014448.1	872331	Mycoplasma hyorhinis HUB-1	0	0	0	0	0	0	0	0	0
NC_012029.1	416348	Halorubrum lacusprofundi ATCC 49239	2	1	1	0	0	1	1	0	0
NC_014100.1	509190	Caulobacter segnis ATCC 21756	1	1	0	0	0	1	0	0	0
NC_021741.1	1346614	Serratia liquefaciens ATCC 27592	3	3	0	0	0	3	0	0	0
NC_023013.1	1417673	Haloarcula hispanica N601	1	1	0	0	0	1	0	0	0
NZ_CP009863.1	72407	Klebsiella pneumoniae subsp. pneumoniae	5	5	0	0	0	4	1	0	0
NZ_CP009679.1	492670	Bacillus methylotrophicus	4	4	0	0	0	1	3	0	0
NZ_CP007274.1	1412475	Salmonella enterica subsp. enterica serovar Enteritidis str. SA20093266	2	2	0	0	0	2	0	0	0
NC_017644.1	1033813	Escherichia coli NA114	4	3	1	0	0	3	1	0	0
NC_010524.1	395495	Leptothrix cholodnii SP-6	4	4	0	0	0	4	0	0	0
NZ_HG941718.1	1359206	Escherichia coli ST131	3	3	0	0	0	3	0	0	0
NC_018073.1	591365	Streptococcus intermedius JTH08	1	1	0	0	0	1	0	0	0
NZ_CP009928.1	1324352	Chryseobacterium gallinarum	3	3	0	0	0	3	0	0	0
NC_016610.1	203275	Tannerella forsythia 92A2	1	1	0	0	0	1	0	0	0
NC_019974.1	694430	Natronococcus occultus SP4	4	3	0	0	0	3	0	0	0
NC_015744.1	887712	Chlamydia trachomatis L2c	1	1	0	0	0	1	0	0	0
NC_015185.1	868864	Desulfurobacterium thermolithotrophum DSM 11699	2	1	0	0	0	1	0	0	0
NC_021893.1	1007870	Chlamydia trachomatis RC-L2/55	1	1	0	0	0	1	0	0	0
NZ_AP012334.1	1150468	Scardovia inopinata JCM 12537	2	2	0	0	0	2	0	0	0
NC_019396.1	1224746	Gluconobacter oxydans H24	5	4	0	0	0	4	0	0	0
NZ_CP009125.1	29471	Pectobacterium atrosepticum	2	2	0	0	0	2	0	0	0
NZ_LK028559.1	35623	Acholeplasma oculi	0	0	0	0	0	0	0	0	0
NZ_CP007738.1	235	Brucella abortus	1	1	0	0	0	0	1	0	0
NZ_CP011256.1	339	Xanthomonas campestris	1	1	0	0	0	1	0	0	0
NZ_CM001467.1	1144888	Rickettsia helvetica C9P9	1	1	0	0	0	1	0	0	0
NZ_CP007441.1	316	Pseudomonas stutzeri	5	5	0	0	0	5	0	0	0
NC_017593.1	869216	Streptococcus pneumoniae INV200	1	1	0	0	0	1	0	0	0
NC_017769.2	1130804	Streptococcus pneumoniae ST556	1	1	0	0	0	1	0	0	0
NC_020518.1	1110693	Escherichia coli str. K-12 substr. MDS42	2	0	2	0	0	0	2	0	0
NC_015696.1	573569	Francisella sp. TX077308	1	1	0	0	0	1	0	0	0
NZ_AP012555.1	1229671	Mycobacterium avium subsp. hominissuis TH135	0	0	0	0	0	0	0	0	0
NC_014171.1	714359	Bacillus thuringiensis BMB171	4	4	0	0	0	1	3	0	0
NC_021057.1	1234603	Candidatus Moranella endobia PCVAL	0	0	0	0	0	0	0	0	0
NZ_CP009447.1	319705	Mycobacterium abscessus subsp. bolletii	1	1	0	0	0	1	0	0	0
NC_018939.1	85962	Helicobacter pylori 26695	2	2	0	0	0	2	0	0	0
NC_004369.1	196164	Corynebacterium efficiens YS-314	1	1	0	0	0	0	1	0	0
NC_016779.1	347495	Bacillus cereus F837/76	2	1	0	0	0	0	1	0	0
NZ_CP010289.1	119857	Francisella tularensis subsp. holarctica	0	0	0	0	0	0	0	0	0
NC_013411.1	544556	Geobacillus sp. Y412MC61	2	2	0	0	0	0	2	0	0
NZ_CP010284.1	858307	Salmonella enterica subsp. enterica serovar Newport str. CVM N1543	3	3	0	0	0	3	0	0	0
NZ_AHJO01000001.1	1132501	Sulfolobus islandicus M.16.23	0	0	0	0	0	0	0	0	0
NC_017941.2	523841	Haloferax mediterranei ATCC 33500	1	1	0	0	0	1	0	0	0
NC_022659.1	1241583	Burkholderia pseudomallei NCTC 13179	7	5	0	0	0	1	4	0	0
NC_004088.1	187410	Yersinia pestis KIM10+	2	2	0	0	0	0	2	0	0
NC_015589.1	696281	Desulfotomaculum ruminis DSM 2154	4	4	0	0	0	4	0	0	0
NC_015435.1	1006006	Metallosphaera cuprina Ar-4	0	0	0	0	0	0	0	0	0
NC_015214.1	891391	Lactobacillus acidophilus 30SC	0	0	0	0	0	0	0	0	0
NZ_CP012590.1	712122	Actinomyces sp. oral taxon 414	2	2	0	0	0	2	0	0	0
NZ_CP011564.1	1604004	Halanaeroarchaeum sulfurireducens	2	2	0	0	0	2	0	0	0
NZ_CP011279.1	93218	Pandoraea apista	3	3	0	0	0	3	0	0	0
NZ_CP011922.1	1449091	Francisella noatunensis subsp. orientalis FNO24	1	1	0	0	0	1	0	0	0
NZ_CP004377.1	1249477	Burkholderia pseudomallei NAU35A-3	9	8	0	0	0	2	6	0	0
NZ_CP003328.1	1147130	Pasteurella multocida subsp. multocida str. HB03	0	0	0	0	0	0	0	0	0
NC_008786.1	391735	Verminephrobacter eiseniae EF01-2	3	3	0	0	0	3	0	0	0
NC_004307.2	206672	Bifidobacterium longum NCC2705	3	3	0	0	0	3	0	0	0
NC_021738.1	1311759	Mannheimia haemolytica D171	2	2	0	0	0	2	0	0	0
NZ_CP011538.1	2098	Mycoplasma hominis	0	0	0	0	0	0	0	0	0
NZ_AEUT02000001.1	873447	Streptococcus parauberis NCFD 2020	2	2	0	0	0	2	0	0	0
NC_009511.1	392499	Sphingomonas wittichii RW1	4	4	0	0	0	4	0	0	0
NC_009776.1	453591	Ignicoccus hospitalis KIN4/I	1	1	0	0	0	1	0	0	0
NZ_CP012349.1	938141	Salmonella enterica subsp. enterica serovar Sloterdijk str. ATCC 15791	2	2	0	0	0	2	0	0	0
NZ_CP009499.1	1299331	Mycobacterium intracellulare 1956	5	5	0	0	0	1	4	0	0
NC_019751.1	1170562	Calothrix sp. PCC 6303	4	4	0	0	0	4	0	0	0
NC_018417.1	1202539	Candidatus Carsonella ruddii HT isolate Thao2000	0	0	0	0	0	0	0	0	0
NC_021593.1	1281781	Bifidobacterium animalis subsp. lactis Bl12	1	1	0	0	0	1	0	0	0
NZ_CP006819.1	1408178	Streptococcus thermophilus ASCC 1275	1	1	0	0	0	1	0	0	0
NZ_CP009016.1	611301	Xanthomonas citri subsp. citri	1	1	0	0	0	0	1	0	0
NZ_CP010441.1	83333	Escherichia coli K-12	5	3	1	0	0	3	1	0	0
NC_017505.1	630588	Neisseria meningitidis alpha710	0	0	0	0	0	0	0	0	0
NZ_HG965802.1	38323	Bartonella henselae	4	4	0	0	0	4	0	0	0
NC_016909.1	1105105	Rickettsia rickettsii str. Arizona	0	0	0	0	0	0	0	0	0
NC_018412.1	1159203	Mycoplasma gallisepticum CA06_2006.052-5-2P	0	0	0	0	0	0	0	0	0
NZ_CP002871.1	1010834	Mycobacterium tuberculosis HKBS1	3	3	0	0	0	0	3	0	0
NC_008595.1	243243	Mycobacterium avium 104	2	2	0	0	0	2	0	0	0
NZ_CP010442.1	83333	Escherichia coli K-12	2	2	0	0	0	2	0	0	0
NZ_CP008953.1	208439	Amycolatopsis japonica	7	7	0	0	0	7	0	0	0
NZ_CP010818.1	65058	Corynebacterium ulcerans	2	2	0	0	0	2	0	0	0
NC_014298.1	795797	Halalkalicoccus jeotgali B3	4	4	0	0	0	4	0	0	0
NC_021889.1	907267	Chlamydia trachomatis RC-J/953	1	1	0	0	0	1	0	0	0
NC_018866.1	1147129	Dehalobacter sp. DCA	1	1	0	0	0	0	1	0	0
NC_017111.1	634457	Acetobacter pasteurianus IFO 3283-32	1	1	0	0	0	1	0	0	0
NZ_CP009429.1	33050	Sphingopyxis macrogoltabida	5	5	0	0	0	5	0	0	0
NC_020064.1	1249634	Serratia marcescens FGI94	4	4	0	0	0	4	0	0	0
NC_017281.1	718271	Campylobacter jejuni subsp. jejuni S3	4	4	0	0	0	4	0	0	0
NC_010278.1	434271	Actinobacillus pleuropneumoniae serovar 3 str. JL03	2	2	0	0	0	1	1	0	0
NC_011992.1	535289	Acidovorax ebreus TPSY	2	2	0	0	0	2	0	0	0
NC_017063.1	1055527	Helicobacter pylori ELS37	3	3	0	0	0	3	0	0	0
NZ_CP011522.1	1649184	Streptomyces sp. CFMR 7	11	11	0	0	0	11	0	0	0
NZ_CP010519.1	1888	Streptomyces albus	8	8	0	0	0	8	0	0	0
NZ_CP012482.1	1408	Bacillus pumilus	5	3	0	0	0	3	0	0	0
NC_009656.1	381754	Pseudomonas aeruginosa PA7	3	3	0	0	0	3	0	0	0
NZ_CP009117.1	1398491	Borrelia valaisiana Tom4006	0	0	0	0	0	0	0	0	0
NZ_CP007520.1	743967	Mycoplasma yeatsii GM274B	0	0	0	0	0	0	0	0	0
NC_020210.1	1233873	Geobacillus sp. GHH01	0	0	0	0	0	0	0	0	0
NC_012925.1	218494	Streptococcus suis P1/7	2	2	0	0	0	2	0	0	0
NZ_CP011018.1	562	Escherichia coli	3	1	2	0	0	1	2	0	0
NC_016809.1	862964	Haemophilus influenzae 10810	0	0	0	0	0	0	0	0	0
NZ_CP009759.1	633	Yersinia pseudotuberculosis	6	6	0	0	0	1	5	0	0
NZ_CP009426.1	1773	Mycobacterium tuberculosis	3	3	0	0	0	0	3	0	0
NZ_CP012090.1	659019	Mycobacterium tuberculosis W-148	4	4	0	0	0	0	4	0	0
NC_015573.1	760568	Desulfotomaculum kuznetsovii DSM 6115	2	2	0	0	0	2	0	0	0
NC_015726.1	1042878	Cupriavidus necator N-1	7	4	0	0	0	4	0	0	0
NZ_CP007147.1	1448140	Pseudomonas aeruginosa YL84	2	2	0	0	0	2	0	0	0
NZ_CP008714.1	487909	Xanthomonas translucens pv. undulosa	2	2	0	0	0	2	0	0	0
NC_015931.1	694429	Pyrolobus fumarii 1A	0	0	0	0	0	0	0	0	0
NC_003997.3	198094	Bacillus anthracis str. Ames	4	4	0	0	0	2	2	0	0
NZ_CP007522.1	1316911	Bifidobacterium animalis subsp. lactis KLDS2.0603	2	2	0	0	0	2	0	0	0
NC_014961.1	765177	Desulfurococcus mucosus DSM 2162	2	1	0	0	0	1	0	0	0
NZ_CP011389.1	1309411	'Deinococcus soli' Cha et al. 2014	0	0	0	0	0	0	0	0	0
NC_017307.1	935697	Corynebacterium pseudotuberculosis CIP 52.97	1	1	0	0	0	1	0	0	0
NC_008610.1	413404	Candidatus Ruthia magnifica str. Cm (Calyptogena magnifica)	0	0	0	0	0	0	0	0	0
NC_015946.1	743965	Mycoplasma putrefaciens KS1	3	3	0	0	0	3	0	0	0
NZ_HG917972.2	1131442	Mycobacterium marinum E11	7	7	0	0	0	5	2	0	0
NC_017503.1	708616	Mycoplasma gallisepticum str. F	2	2	0	0	0	2	0	0	0
NC_013512.1	525898	Sulfurospirillum deleyianum DSM 6946	2	2	0	0	0	2	0	0	0
NC_013959.1	580332	Sideroxydans lithotrophicus ES-1	3	3	0	0	0	3	0	0	0
NZ_CP011647.1	573	Klebsiella pneumoniae	2	2	0	0	0	2	0	0	0
NZ_AP014522.1	1420599	Pseudomonas protegens Cab57	2	2	0	0	0	2	0	0	0
NZ_LN847257.1	83558	Chlamydia pneumoniae	2	2	0	0	0	2	0	0	0
NC_020209.1	1282356	Pseudomonas poae RE*1-1-14	3	3	0	0	0	3	0	0	0
NC_012207.1	561275	Mycobacterium bovis BCG str. Tokyo 172	2	2	0	0	0	0	2	0	0
NC_015677.1	365046	Ramlibacter tataouinensis TTB310	5	5	0	0	0	5	0	0	0
NC_014472.1	313603	Maribacter sp. HTCC2170	1	1	0	0	0	1	0	0	0
NZ_CP004858.1	570416	Bacillus thuringiensis serovar kurstaki str. YBT-1520	3	3	0	0	0	0	3	0	0
NZ_CP009509.1	1434117	Methanosarcina mazei WWM610	1	1	0	0	0	1	0	0	0
NC_019776.1	755178	Cyanobacterium aponinum PCC 10605	2	0	0	0	0	0	0	0	0
NZ_CP007176.1	1458279	Staphylococcus aureus USA300-ISMMS1	1	1	0	0	0	1	0	0	0
NZ_CP004393.1	1208324	Celeribacter indicus	3	3	0	0	0	3	0	0	0
NZ_CP010299.1	1280	Staphylococcus aureus	2	2	0	0	0	2	0	0	0
NC_015391.1	208596	Carnobacterium sp. 17-4	1	1	0	0	0	1	0	0	0
NC_011769.1	883	Desulfovibrio vulgaris str. 'Miyazaki F'	1	1	0	0	0	1	0	0	0
NZ_CP007727.1	1094170	Klebsiella pneumoniae subsp. pneumoniae KPNIH10	7	7	0	0	0	6	1	0	0
NC_020299.1	1208920	Candidatus Kinetoplastibacterium oncopeltii TCC290E	0	0	0	0	0	0	0	0	0
NC_012778.1	515620	[Eubacterium] eligens ATCC 27750	2	2	0	0	0	2	0	0	0
NC_022582.1	1156433	Streptococcus sp. I-P16	0	0	0	0	0	0	0	0	0
NC_006513.1	76114	Aromatoleum aromaticum EbN1	5	5	0	0	0	5	0	0	0
NC_018178.1	1191523	Melioribacter roseus P3M-2	2	1	0	0	0	1	0	0	0
NZ_CP007744.1	29471	Pectobacterium atrosepticum	1	1	0	0	0	1	0	0	0
NC_022107.1	1340853	Chlamydia trachomatis F/11-96	0	0	0	0	0	0	0	0	0
NC_021807.1	1336746	Streptococcus pyogenes HSC5	1	1	0	0	0	1	0	0	0
NZ_CP011280.1	187101	Sneathia amnii	0	0	0	0	0	0	0	0	0
NC_010546.1	43989	Cyanothece sp. ATCC 51142	2	2	0	0	0	2	0	0	0
NZ_CP011060.1	1329908	Borrelia hermsii CC1	0	0	0	0	0	0	0	0	0
NC_002689.2	273116	Thermoplasma volcanium GSS1	1	1	0	0	0	1	0	0	0
NC_007481.1	326442	Pseudoalteromonas haloplanktis TAC125	4	4	0	0	0	4	0	0	0
NZ_CP009341.1	1392	Bacillus anthracis	6	6	0	0	0	1	5	0	0
NC_013199.1	568704	Lactobacillus rhamnosus Lc 705	3	3	0	0	0	3	0	0	0
NC_009783.1	338187	Vibrio campbellii ATCC BAA-1116	3	3	0	0	0	2	1	0	0
NC_008260.1	393595	Alcanivorax borkumensis SK2	0	0	0	0	0	0	0	0	0
NZ_CP010436.1	210	Helicobacter pylori	1	1	0	0	0	1	0	0	0
NC_017502.1	710128	Mycoplasma gallisepticum str. R(high)	1	0	0	0	0	0	0	0	0
NZ_CP010586.1	1452722	Bacillus megaterium Q3	5	5	0	0	0	5	0	0	0
NC_011989.1	311402	Agrobacterium vitis S4	6	6	0	0	0	6	0	0	0
NC_014638.1	702459	Bifidobacterium bifidum PRL2010	3	3	0	0	0	3	0	0	0
NZ_CP009601.1	1249660	Burkholderia thailandensis 2002721643	2	1	0	0	0	1	0	0	0
NC_013192.1	523794	Leptotrichia buccalis C-1013-b	0	0	0	0	0	0	0	0	0
NC_014924.1	743721	Pseudoxanthomonas suwonensis 11-1	3	3	0	0	0	3	0	0	0
NC_015633.1	882102	Vibrio anguillarum 775	3	3	0	0	0	3	0	0	0
NZ_CP010089.1	29338	Bacillus thuringiensis serovar galleriae	6	5	0	0	0	1	4	0	0
NZ_CP010912.1	589873	Alteromonas australica	5	5	0	0	0	5	0	0	0
NZ_CP011535.1	1314	Streptococcus pyogenes	0	0	0	0	0	0	0	0	0
NC_009009.1	388919	Streptococcus sanguinis SK36	2	2	0	0	0	2	0	0	0
NZ_CP011259.1	1124917	Salmonella enterica subsp. enterica serovar Agona str. 460004 2-1	2	2	0	0	0	2	0	0	0
NZ_CP009692.1	1405	Bacillus mycoides	7	7	0	0	0	3	4	0	0
NZ_CP009273.1	679895	Escherichia coli BW25113	6	1	4	0	0	1	4	0	0
NC_022081.1	1150476	Bacillus methylotrophicus UCMB5113	1	1	0	0	0	0	1	0	0
NC_006677.1	290633	Gluconobacter oxydans 621H	2	2	0	0	0	2	0	0	0
NC_016616.1	640081	Dechlorosoma suillum PS	2	2	0	0	0	2	0	0	0
NC_014328.1	748727	Clostridium ljungdahlii DSM 13528	5	4	0	0	0	2	2	0	0
NC_022898.1	1415167	Bacillus subtilis PY79	3	3	0	0	0	0	3	0	0
NC_010513.1	405440	Xylella fastidiosa M12	4	4	0	0	0	4	0	0	0
NZ_CP006772.1	1400053	Bacteroidales bacterium CF	0	0	0	0	0	0	0	0	0
NC_016802.1	698968	Corynebacterium diphtheriae HC02	1	1	0	0	0	1	0	0	0
NZ_CP011129.1	84531	Lysobacter antibioticus	5	5	0	0	0	5	0	0	0
NC_016787.1	698969	Corynebacterium diphtheriae HC03	3	3	0	0	0	3	0	0	0
NZ_CP007183.1	1183378	Campylobacter coli RM1875	2	2	0	0	0	2	0	0	0
NC_004552.2	218497	Chlamydophila abortus S26/3	0	0	0	0	0	0	0	0	0
NZ_CP007541.1	325775	Coxiella endosymbiont of Amblyomma americanum	1	1	0	0	0	1	0	0	0
NC_016111.1	1003195	Streptomyces cattleya NRRL 8057 = DSM 46488	3	2	0	0	0	2	0	0	0
NC_021872.1	1358027	Lactobacillus reuteri TD1	2	1	0	0	0	1	0	0	0
NZ_CP009290.1	86192	Pseudomonas chlororaphis subsp. aurantiaca	6	5	0	0	0	5	0	0	0
NC_017192.1	944547	Arcobacter sp. L	3	3	0	0	0	3	0	0	0
NC_022583.1	1406864	Mesoplasma florum W37	1	1	0	0	0	1	0	0	0
NZ_CP007760.1	520466	Brucella melitensis bv. 3 str. Ether	0	0	0	0	0	0	0	0	0
NC_010161.1	382640	Bartonella tribocorum CIP 105476	1	0	0	0	0	0	0	0	0
NC_010336.1	484022	Francisella philomiragia subsp. philomiragia ATCC 25017	1	1	0	0	0	1	0	0	0
NC_020164.1	1194526	Staphylococcus warneri SG1	2	2	0	0	0	2	0	0	0
NZ_CP012381.1	1587	Lactobacillus helveticus	2	2	0	0	0	2	0	0	0
NC_002745.2	158879	Staphylococcus aureus subsp. aureus N315	1	1	0	0	0	1	0	0	0
NC_023066.1	1408272	Pseudomonas aeruginosa LES431	3	3	0	0	0	3	0	0	0
NZ_CP012358.1	1697053	Pseudomonadaceae bacterium B4199	0	0	0	0	0	0	0	0	0
NZ_CP007393.1	562	Escherichia coli	5	4	1	0	0	4	1	0	0
NC_014831.1	644966	Thermaerobacter marianensis DSM 12885	2	1	0	0	0	1	0	0	0
NC_017790.1	745776	Deinococcus gobiensis I-0	2	2	0	0	0	2	0	0	0
NC_012891.1	486410	Streptococcus dysgalactiae subsp. equisimilis GGS_124	0	0	0	0	0	0	0	0	0
NC_015709.1	579138	Zymomonas mobilis subsp. pomaceae ATCC 29192	0	0	0	0	0	0	0	0	0
NZ_CP008881.1	96345	Flavobacterium psychrophilum	1	1	0	0	0	1	0	0	0
NZ_CP009511.1	1434115	Methanosarcina mazei SarPi	2	2	0	0	0	2	0	0	0
NC_015590.1	693982	Sinorhizobium meliloti AK83	5	4	0	0	0	4	0	0	0
NZ_CP006027.1	1248902	Escherichia coli O145:H28 str. RM13514	7	3	3	0	0	3	3	0	0
NC_016048.1	693746	Oscillibacter valericigenes Sjm18-20	4	4	0	0	0	4	0	0	0
NZ_CP006271.1	585425	Synechococcus sp. KORDI-52	0	0	0	0	0	0	0	0	0
NZ_CP004383.1	1249667	Burkholderia thailandensis USAMRU Malaysia #20	5	4	0	0	0	4	0	0	0
NC_022126.1	585143	Staphylococcus aureus subsp. aureus 55/2053	0	0	0	0	0	0	0	0	0
NC_013654.1	431946	Escherichia coli SE15	6	5	1	0	0	5	1	0	0
NZ_CP013050.1	55802	Thermococcus barophilus	1	1	0	0	0	1	0	0	0
NC_019753.1	1173022	Crinalium epipsammum PCC 9333	6	5	0	0	0	5	0	0	0
NZ_CP012024.1	1479	Bacillus smithii	2	2	0	0	0	2	0	0	0
NC_006155.1	273123	Yersinia pseudotuberculosis IP 32953	2	2	0	0	0	0	2	0	0
NZ_CP011528.1	1280	Staphylococcus aureus	1	1	0	0	0	1	0	0	0
NZ_CP009641.1	451709	Bacillus cereus 03BB108	2	2	0	0	0	0	2	0	0
NC_013921.1	580331	Thermoanaerobacter italicus Ab9	1	1	0	0	0	1	0	0	0
NC_013124.1	525909	Acidimicrobium ferrooxidans DSM 10331	0	0	0	0	0	0	0	0	0
NZ_CP009709.1	1121088	Bacillus coagulans DSM 1 = ATCC 7050	3	3	0	0	0	3	0	0	0
NC_018692.1	1004785	Alteromonas macleodii str. 'Black Sea 11'	3	3	0	0	0	3	0	0	0
NC_011365.1	272568	Gluconacetobacter diazotrophicus PA1 5	4	4	0	0	0	4	0	0	0
NZ_CP007133.1	1248903	Escherichia coli O145:H28 str. RM12761	3	2	1	0	0	2	1	0	0
NC_018010.1	866536	Belliella baltica DSM 15883	1	1	0	0	0	1	0	0	0
NZ_CP013287.1	1639	Listeria monocytogenes	0	0	0	0	0	0	0	0	0
NZ_CP009217.1	1528098	Rickettsiales bacterium Ac37b	0	0	0	0	0	0	0	0	0
NC_002678.2	266835	Mesorhizobium loti MAFF303099	4	4	0	0	0	4	0	0	0
NC_002163.1	192222	Campylobacter jejuni subsp. jejuni NCTC 11168 = ATCC 700819	0	0	0	0	0	0	0	0	0
NC_015460.1	1005058	Gallibacterium anatis UMN179	2	1	0	0	0	1	0	0	0
NZ_CP009927.1	1719	Corynebacterium pseudotuberculosis	1	1	0	0	0	1	0	0	0
NZ_LN849008.1	520	Bordetella pertussis	5	5	0	0	0	2	3	0	0
NC_008344.1	335283	Nitrosomonas eutropha C91	1	1	0	0	0	1	0	0	0
NC_022780.1	1408206	Pediococcus pentosaceus SL4	2	1	0	0	0	1	0	0	0
NC_010172.1	419610	Methylobacterium extorquens PA1	0	0	0	0	0	0	0	0	0
NC_018001.1	768672	Desulfurococcus fermentans DSM 16532	1	1	0	0	0	1	0	0	0
NC_007951.1	266265	Burkholderia xenovorans LB400	6	6	0	0	0	6	0	0	0
NC_005773.3	264730	Pseudomonas savastanoi pv. phaseolicola 1448A	1	1	0	0	0	1	0	0	0
NC_017191.1	1034836	Bacillus amyloliquefaciens XH7	2	2	0	0	0	0	2	0	0
NC_013450.1	681288	Staphylococcus aureus subsp. aureus ED98	3	3	0	0	0	3	0	0	0
NC_010831.1	331678	Chlorobium phaeobacteroides BS1	1	1	0	0	0	1	0	0	0
NZ_CP011409.1	1262470	Herbaspirillum hiltneri N3	4	4	0	0	0	4	0	0	0
NC_022247.1	1246301	Variovorax paradoxus B4	3	3	0	0	0	3	0	0	0
NC_022538.1	1318466	Acholeplasma palmae J233	2	1	0	0	0	1	0	0	0
NC_018630.1	697283	Streptococcus pneumoniae gamPNI0373	1	1	0	0	0	1	0	0	0
NC_012804.1	593117	Thermococcus gammatolerans EJ3	3	3	0	0	0	3	0	0	0
NC_022082.1	1380908	Klebsiella pneumoniae JM45	5	3	1	1	0	2	2	1	0
NZ_CP007392.1	562	Escherichia coli	6	5	1	0	0	5	1	0	0
NC_003910.7	167879	Colwellia psychrerythraea 34H	4	4	0	0	0	4	0	0	0
NZ_CP012176.1	43687	Metallosphaera sedula	1	1	0	0	0	1	0	0	0
NZ_CP012109.1	1297742	Myxococcus sp. (contaminant ex DSM 436)	6	6	0	0	0	6	0	0	0
NZ_CP003949.1	543736	Rhodococcus opacus PD630	8	8	0	0	0	6	2	0	0
NC_014210.1	446468	Nocardiopsis dassonvillei subsp. dassonvillei DSM 43111	5	5	0	0	0	5	0	0	0
NC_017910.1	630626	Shimwellia blattae DSM 4481 = NBRC 105725	1	1	0	0	0	1	0	0	0
NZ_CP012805.1	1328	Streptococcus anginosus	0	0	0	0	0	0	0	0	0
NC_017920.1	416344	Burkholderia sp. KJ006	6	6	0	0	0	1	4	1	0
NC_021810.1	1124936	Salmonella enterica subsp. enterica serovar Heidelberg str. 41578	3	3	0	0	0	3	0	0	0
NZ_CP013130.1	60520	Lactobacillus paraplantarum	5	5	0	0	0	5	0	0	0
NZ_CP007657.1	1280	Staphylococcus aureus	0	0	0	0	0	0	0	0	0
NZ_CP009500.1	65058	Corynebacterium ulcerans	0	0	0	0	0	0	0	0	0
NC_013361.1	573235	Escherichia coli O26:H11 str. 11368	5	1	4	0	0	1	4	0	0
NZ_CP007247.1	1412455	Salmonella enterica subsp. enterica serovar Enteritidis str. EC20110221	0	0	0	0	0	0	0	0	0
NC_009699.1	441772	Clostridium botulinum F str. Langeland	2	2	0	0	0	2	0	0	0
NZ_CP011989.1	1284802	Klebsiella pneumoniae UHKPC33	1	1	0	0	0	1	0	0	0
NZ_CP009781.1	1453495	Yersinia aldovae 670-83	1	0	0	0	1	0	0	0	1
NC_014216.1	589865	Desulfurivibrio alkaliphilus AHT 2	0	0	0	0	0	0	0	0	0
NC_010830.1	452471	Candidatus Amoebophilus asiaticus 5a2	0	0	0	0	0	0	0	0	0
NC_016051.1	246969	Thermococcus sp. AM4	1	1	0	0	0	1	0	0	0
NZ_CP007668.1	935590	Neisseria meningitidis M0579	4	4	0	0	0	3	1	0	0
NC_002488.3	160492	Xylella fastidiosa 9a5c	1	1	0	0	0	1	0	0	0
NZ_CP010406.1	1446792	Bacillus sp. Pc3	1	1	0	0	0	0	1	0	0
NC_018587.1	932919	Listeria monocytogenes SLCC2755	4	4	0	0	0	4	0	0	0
NC_014844.1	643562	Desulfovibrio aespoeensis Aspo-2	7	7	0	0	0	7	0	0	0
NZ_CP003679.1	1095955	Treponema pallidum subsp. pallidum str. Sea 81-4	0	0	0	0	0	0	0	0	0
NZ_CP010540.1	1263761	Mycoplasma pneumoniae 39443	1	1	0	0	0	1	0	0	0
NC_020911.1	391626	Octadecabacter antarcticus 307	6	6	0	0	0	6	0	0	0
NC_016797.1	1112912	Brucella suis VBI22	3	3	0	0	0	0	3	0	0
NC_014618.1	701347	Enterobacter lignolyticus SCF1	3	3	0	0	0	3	0	0	0
NC_018681.1	1133849	Nocardia brasiliensis ATCC 700358	4	4	0	0	0	4	0	0	0
NZ_CP012649.1	1661	Trueperella pyogenes	3	3	0	0	0	3	0	0	0
NC_022998.1	1276258	Spiroplasma apis B31	0	0	0	0	0	0	0	0	0
NC_015576.1	875328	Mycobacterium sinense	4	4	0	0	0	4	0	0	0
NZ_CP006934.1	1276257	Spiroplasma sabaudiense Ar-1343	0	0	0	0	0	0	0	0	0
NC_013525.1	525904	Thermobaculum terrenum ATCC BAA-798	1	1	0	0	0	1	0	0	0
NC_007797.1	212042	Anaplasma phagocytophilum str. HZ	0	0	0	0	0	0	0	0	0
NC_016930.1	481009	Rickettsia philipii str. 364D	0	0	0	0	0	0	0	0	0
NZ_CP009084.2	149539	Salmonella enterica subsp. enterica serovar Enteritidis	2	2	0	0	0	2	0	0	0
NC_012582.1	345073	Vibrio cholerae O395	1	1	0	0	0	1	0	0	0
NZ_CP008747.1	1284	Staphylococcus hyicus	1	1	0	0	0	1	0	0	0
NC_020568.1	1074919	Staphylococcus aureus subsp. aureus ST228	0	0	0	0	0	0	0	0	0
[truncated: 3,303 more rows]
