# Supplementary material for: Centrifuge: rapid and sensitive classification of metagenomic sequences
Source: Genome Res. 2016 Dec;26(12):1721–9. doi: 10.1101/gr.210641.116 (PMC5131823; doi:10.1101/gr.210641.116)
Supplement: Supplemental Material [file supp_gr.210641.116_Supplemental_Table_S4.xlsx]

## Sheet: ebola-patients-table
Patient ID	SRRID(s)	Patient outcome
G3670.1	SRR1553450	Discharged
G3765.2	SRR1553501, SRR1553502	Discharged
G3789.1	SRR1553525, SRR1553526	Discharged
G3796	SRR1553529, SRR1553530	Discharged
G3819	SRR1553559, SRR1553559	Discharged
G3821	SRR1553563, SRR1553564	Discharged
G3850	SRR1553595, SRR1553596	Discharged
G3764	SRR1553499, SRR1553500	Died
G3795	SRR1553527, SRR1553528	Died
G3808	SRR1553543, SRR1553544	Died
G3825	SRR1553569, SRR1553570, SRR1553571, SRR1553572	Died
G3826	SRR1553573, SRR1553574	Died
G3845	SRR1553589, SRR1553590	Died
G3769	SRR1553503, SRR1553504, SRR1553505, SRR1553506, SRR1553507, SRR1553508, SRR1553509, SRR1553510	Discharged
G3799	SRR1553533, SRR1553534	Discharged
G3805	SRR1553537, SRR1553538, SRR1553539, SRR1553540	Discharged
G3809	SRR1553545, SRR1553546	Discharged
G3810	SRR1553547, SRR1553548, SRR1553549, SRR1553550	Discharged
G3817	SRR1553555, SRR1553556	Discharged
G3857	SRR1553603, SRR1553604	Discharged
NM042	SRR1553605, SRR1553606, SRR1553607, SRR1553608, SRR1553609, SRR1553610	Discharged
EM112	SRR1553429, SRR1553430	Died
EM121	SRR1553439, SRR1553440	Died
EM124	SRR1553441, SRR1553442, SRR1553443, SRR1553444, SRR1553445, SRR1553446, SRR1553447, SRR1553448	Died
G3676	SRR1553451, SRR1553452, SRR1553453, SRR1553454	Died
G3677	SRR1553455, SRR1553456, SRR1553457, SRR1553458	Died
G3707	SRR1553471, SRR1553472	Died
G3713	SRR1553473, SRR1553474, SRR1553475, SRR1553476, SRR1553477, SRR1553478	Died
G3724	SRR1553479, SRR1553480	Died
G3735	SRR1553485, SRR1553486, SRR1553487, SRR1553488	Died
G3752	SRR1553495, SRR1553496	Died
G3770	SRR1553511, SRR1553512, SRR1553513, SRR1553514	Died
G3798	SRR1553531, SRR1553532	Died
G3800	SRR1553535, SRR1553536	Died
G3807	SRR1553541, SRR1553542	Died
G3814	SRR1553551, SRR1553552	Died
G3816	SRR1553553, SRR1553554	Died
G3818	SRR1553557, SRR1553558	Died
G3820	SRR1553561, SRR1553562	Died
G3822	SRR1553565, SRR1553566	Died
G3823	SRR1553567, SRR1553568	Died
G3827	SRR1553575, SRR1553576	Died
G3829	SRR1553577, SRR1553578	Died
G3834	SRR1553581, SRR1553582	Died
G3838	SRR1553583, SRR1553584	Died
G3840	SRR1553585, SRR1553586	Died
G3846	SRR1553591, SRR1553592	Died
G3848	SRR1553593, SRR1553594	Died
G3851	SRR1553597, SRR1553598	Died
